# Supplementary material
Source: PubMed Central journal article supplement (PMC5473734)
Supplement: mmc1.pdf [file mmc1.pdf]

**The American Journal of Human Genetics, Volume 100**

## **Supplemental Data**

### **Evaluating the Clinical Validity of Gene-Disease**

#### **Associations: An Evidence-Based Framework**

#### **Developed by the Clinical Genome Resource**

**Natasha T. Strande, Erin Rooney Riggs, Adam H. Buchanan, Ozge Ceyhan-Birsoy, Marina DiStefano, Selina S. Dwight, Jenny Goldstein, Rajarshi Ghosh, Bryce A. Seifert, Tam P. Sneddon, Matt W. Wright, Laura V. Milko, J. Michael Cherry, Monica A. Giovanni, Michael F. Murray, Julianne M. O'Daniel, Erin M. Ramos, Avni B. Santani, Alan F. Scott, Sharon E. Plon, Heidi L. Rehm, Christa L. Martin, and Jonathan S. Berg**

**A. Dominant/X-linked**

$$Z = \log_{10} [1/(0.5)^n]$$

$n$  = dominant segregations

| $n$ | LOD | Points |
|-----|-----|--------|
| 15  | 4.5 | 6.5    |
| 14  | 4.2 | 6.0    |
| 13  | 3.9 | 5.5    |
| 12  | 3.6 | 5.5    |
| 11  | 3.3 | 5.0    |
| 10  | 3.0 | 5.0    |
| 9   | 2.7 | 4.5    |
| 8   | 2.4 | 4.0    |
| 7   | 2.1 | 4.0    |
| 6   | 1.8 | 3.5    |
| 5   | 1.5 | 3.0    |
| 4   | 1.2 | 1.5    |

**B. Recessive**

$$Z = \log_{10} \{1/[(0.25)^{x-1}(0.75)^y]\}$$

$x$  = affected individuals  
 $y$  = unaffected individuals

| $x/y$ | LOD  | Points |
|-------|------|--------|
| 7 / 4 | 4.11 | 6.0    |
| 7 / 1 | 3.73 | 5.5    |
| 6 / 1 | 3.14 | 5.0    |
| 5 / 1 | 2.53 | 4.5    |
| 4 / 3 | 2.18 | 4.0    |
| 4 / 1 | 1.90 | 3.5    |
| 3 / 3 | 1.50 | 3.0    |
| 3 / 2 | 1.45 | 2.5    |
| 3 / 1 | 1.30 | 2.5    |
| 2 / 3 | 1.00 | 1.5    |
| 2 / 2 | 0.85 | 1.0    |
| 2 / 1 | 0.72 | 1.0    |

**C. Proposed Matrix Scoring for LOD Ranges**

| LOD Range   | Points (Max = 7) |
|-------------|------------------|
| $\geq 5.00$ | 7.0              |
| 4.50 – 4.99 | 6.5              |
| 4.00 – 4.49 | 6.0              |
| 3.50 – 3.99 | 5.5              |
| 3.00 – 3.49 | 5.0 (1000:1)     |
| 2.50 – 2.99 | 4.5              |
| 2.00 – 2.49 | 4.0 (100:1)      |
| 1.75 – 1.99 | 3.5              |
| 1.50 – 1.74 | 3.0              |
| 1.25 – 1.49 | 2.5 (10:1)       |
| 1.00 – 1.24 | 1.5              |
| 0.72 – 0.99 | 1.0              |

**Figure S1: Guidelines for approximating LOD scores within the ClinGen clinical validity framework. (A, B)** LOD score ( $Z$ ) estimates are given for multiple segregation scenarios with a suggested number of points to be assigned in the genetic evidence category (Figure 3). **A.** LOD scores for disorders inherited in a dominant or X-linked manner should be calculated using the same equation, where  $n$  equals the number of dominant segregations. **B.** For autosomal recessive disorders, both unaffected carriers ( $y$ ) and affected genotype positive individuals ( $x$ ) should be included in the calculation of the LOD score. In general, the number of affected individuals ( $x$ ) - 1 is equal to the number of affected segregations and can be used interchangeably in this equation. **C.** A suggested number of points is provided for multiple ranges of LOD scores to facilitate consistent scoring in the summary matrix (Figure 4).

| AGTR2 and X-linked intellectual disability       |                                   |                                                                                                                                                                                                            |                                                                                                             |                                                                                |        |        |       |                                                        |     |                                                     |
|--------------------------------------------------|-----------------------------------|------------------------------------------------------------------------------------------------------------------------------------------------------------------------------------------------------------|-------------------------------------------------------------------------------------------------------------|--------------------------------------------------------------------------------|--------|--------|-------|--------------------------------------------------------|-----|-----------------------------------------------------|
|                                                  | Evidence Type                     | Case Information Type                                                                                                                                                                                      | Guidelines                                                                                                  |                                                                                |        | Scores |       | PMIDs/Notes                                            |     |                                                     |
|                                                  |                                   |                                                                                                                                                                                                            | Default                                                                                                     | Range                                                                          | Max    | Points | Tally |                                                        |     |                                                     |
| Genetic Evidence                                 | Case-Level Data <sup>A</sup>      | Variant Evidence                                                                                                                                                                                           | Autosomal Dominant or X-linked Disorder <sup>B</sup>                                                        | Variant is de novo <sup>C</sup>                                                | 2      | 0-3    | 12    |                                                        |     |                                                     |
|                                                  |                                   |                                                                                                                                                                                                            |                                                                                                             | Proband with predicted or proven null variant <sup>D</sup>                     | 1.5    | 0-2    | 10    |                                                        |     |                                                     |
|                                                  |                                   |                                                                                                                                                                                                            |                                                                                                             | Proband with other variant type with some evidence of gene impact <sup>E</sup> | 0.5    | 0-1.5  | 7     | 0.5                                                    | 0.5 | Takeshita E et al. 2012 Oct (22269148) <sup>1</sup> |
|                                                  |                                   | Autosomal Recessive Disease                                                                                                                                                                                | Two variants in trans and at least one de novo <sup>C</sup> or a predicted/proven null variant <sup>D</sup> | 2                                                                              | 0-3    | 12     |       |                                                        |     |                                                     |
|                                                  |                                   |                                                                                                                                                                                                            | Two variants (not predicted/proven null) with some evidence of gene impact <sup>E</sup> in trans            | 1                                                                              | 0-1.5  |        |       |                                                        |     |                                                     |
|                                                  | Segregation <sup>F</sup> Evidence | Evidence of segregation in one or more families                                                                                                                                                            | LOD Score Examples                                                                                          | 3                                                                              | 5      | 0-7    | 7     |                                                        |     |                                                     |
|                                                  |                                   |                                                                                                                                                                                                            |                                                                                                             | 2                                                                              | 4      |        |       |                                                        |     |                                                     |
|                                                  |                                   |                                                                                                                                                                                                            |                                                                                                             | 1.5                                                                            | 3      |        |       |                                                        |     |                                                     |
|                                                  |                                   |                                                                                                                                                                                                            |                                                                                                             | 1                                                                              | 1.5    |        |       |                                                        |     |                                                     |
|                                                  | Case-Control Data <sup>G</sup>    | Case-Control Study Type <sup>H</sup>                                                                                                                                                                       | Case-Control Quality Criteria <sup>I</sup>                                                                  | Guidelines                                                                     |        | Scores |       | PMIDs/Notes                                            |     |                                                     |
| Points/Study                                     |                                   |                                                                                                                                                                                                            |                                                                                                             | Max                                                                            | Points | Tally  |       |                                                        |     |                                                     |
| Single Variant Analysis <sup>H<sub>a</sub></sup> |                                   | 1. Variant Detection Methodology <sup>H<sub>a</sub></sup><br>2. Power <sup>H<sub>b</sub></sup><br>3. Bias and confounding <sup>H<sub>c</sub></sup><br>4. Statistical Significance <sup>H<sub>d</sub></sup> | 0-6                                                                                                         | 12                                                                             |        |        |       |                                                        |     |                                                     |
|                                                  |                                   |                                                                                                                                                                                                            | 0-6                                                                                                         | 12                                                                             |        |        |       |                                                        |     |                                                     |
| Total Genetic Evidence Points (Maximum 12)       |                                   |                                                                                                                                                                                                            |                                                                                                             |                                                                                |        |        | 0.5   |                                                        |     |                                                     |
| Experimental Evidence                            | Evidence Category                 | Evidence Type                                                                                                                                                                                              | Guidelines                                                                                                  |                                                                                |        | Scores |       | PMIDs/Notes                                            |     |                                                     |
|                                                  |                                   |                                                                                                                                                                                                            | Default                                                                                                     | Range                                                                          | Max    | Points | Tally |                                                        |     |                                                     |
|                                                  | Function                          | Biochemical Function                                                                                                                                                                                       | 0.5                                                                                                         | 0 - 2                                                                          | 2      | 0.5    | 0.5   | Vervoort VS et al. 2002 Jun 28 (12089445) <sup>2</sup> |     |                                                     |
|                                                  |                                   | Protein Interaction                                                                                                                                                                                        | 0.5                                                                                                         | 0 - 2                                                                          |        |        |       |                                                        |     |                                                     |
|                                                  |                                   | Expression                                                                                                                                                                                                 | 0.5                                                                                                         | 0 - 2                                                                          |        |        |       |                                                        |     |                                                     |
|                                                  | Functional Alteration             | Cells from affected individual                                                                                                                                                                             | 1                                                                                                           | 0 - 2                                                                          | 2      | 0.5    | 0.5   | Pawlowski TL et al. 2009 Sep (19501643) <sup>3</sup>   |     |                                                     |
|                                                  |                                   | Engineered cells                                                                                                                                                                                           | 0.5                                                                                                         | 0 - 1                                                                          |        |        |       |                                                        |     |                                                     |
|                                                  | Models & Rescue                   | Animal model                                                                                                                                                                                               | 2                                                                                                           | 0 - 4                                                                          | 4      | 2.0    | 2     | Maul B et al. 2008 May (18335189) <sup>4</sup>         |     |                                                     |
|                                                  |                                   | Cell culture model system                                                                                                                                                                                  | 1                                                                                                           | 0 - 2                                                                          |        |        |       |                                                        |     |                                                     |
|                                                  |                                   | Rescue in animal model                                                                                                                                                                                     | 2                                                                                                           | 0 - 4                                                                          |        |        |       |                                                        |     |                                                     |
| Rescue in engineered equivalent                  |                                   | 1                                                                                                                                                                                                          | 0 - 2                                                                                                       |                                                                                |        |        |       |                                                        |     |                                                     |
| Total Experimental Evidence Points (Maximum 6)   |                                   |                                                                                                                                                                                                            |                                                                                                             |                                                                                |        |        | 3     |                                                        |     |                                                     |

**Figure S2: Summary of evidence for a relationship between AGTR2 and X-linked intellectual disability.**

Evidence for the examples presented in Table 1 and Figure 5 is summarized in Figures S2-S65. The number of points awarded for each type of evidence and their corresponding references are provided. Footnotes A-I are the guidelines used to assess genetic evidence within this framework and apply to all of the examples presented in the following figures.

- A. Each case may be given points for A) variant evidence (in the context of the appropriate mode of inheritance) and B) segregation evidence, if applicable (see footnote F and Figure S1 for more details on segregation evidence).
- B. In X-linked disorders, affected probands will often be hemizygous males and/or heterozygous females. Recognizing that there can be rare cases of females affected by X-linked recessive disorders (due to chromosomal aneuploidy, skewed X inactivation, or homozygosity for a sequence variant) evaluators must interpret individual cases and X-linked pedigrees with caution.
- C. Points should be adjusted depending on statistical expectation of *de novo* variation in the gene in question for variants.

- D. As described in the 2015 ACMG/AMP sequence variant interpretation guidelines<sup>5</sup>, null variants (typically nonsense, frameshift, canonical +/-1 or 2 splice sites, initiation codon, single or multi-exon deletions) are considered “very strong evidence for pathogenicity” in genes for which loss of function is a known disease mechanism. Disease mechanism can be assumed loss of function (LOF) if the gene is LOF constrained. LOF constraint scores must be interpreted in the context of the disease in question – genes associated with severe, pediatric-onset disorders are more likely to show constraint than adult-onset conditions where overall fitness is not impacted.
- E. For variants NOT considered to be “null” (typically missense), at least some impact to gene function must be demonstrated for the case to count. Impact based on predictions only would score less than the default 0.5 points and impact based on functional validation can score 0.5 or above (up to 1.5/case) depending on the validation quality and biological representativeness of the functional assay.
- F. LOD scores reported by the authors of a peer-reviewed journal article may be used to assign segregation points as outlined in the scoring matrix above. If a LOD score is not provided by the authors, one may be estimated for informative families with rare, highly penetrant disorders in which phenocopies are expected to be rare or absent. Below are guidelines for calculating estimated LOD scores in the appropriate scenarios are included in the standard operating procedure available online.
- G. Case-control studies should be independently assessed to evaluate the quality of the study design preferably in concert with an expert.
- H. Case-control studies are classified based on how variation in cases and controls is evaluated: single variant analysis or aggregate variant analysis. Studies presenting both types of analyses may be counted in either category at the discretion of the curator/expert, but the same variants should not be counted in both categories.
- a. *Single variant analysis* studies are those in which individual variants are evaluated for statistical enrichment in cases compared to controls. More than one variant may be analyzed, but the variants should be independently assessed with appropriate statistical correction for multiple testing.
- b. *Aggregate variant analysis* studies are those in which the statistical enrichment of two or more variants as an aggregate is assessed in cases compared to controls. This comparison could be accomplished by genotyping specific variants or by sequencing the entire gene.
- I. Points for case-control studies may be assigned at the discretion of expert opinion based on the overall quality of each study. The following should be considered when evaluating case-control study quality:
- a. *Variant Detection Methodology*: Cases and controls should ideally be analyzed using methods with equivalent analytical performance (e.g. equivalent genotype methods, sufficient and equivalent depth and quality of sequencing coverage, correction for batch effects).
- b. *Power*: The study should analyze a sufficient number of cases and controls given the prevalence of the disease, the allele frequency, and the expected effect size in question to provide appropriate statistical power to detect an association.
- c. *Bias and Confounding factors*: The manner in which cases and controls were selected for participation and the degree of case-control matching may impact the outcome of the study. The following are some factors that should be considered:
- i. Are there systematic differences between individuals selected for study and individuals not selected for study?
- ii. Are the cases and controls matched by demographic information (e.g., age, ethnicity, location of recruitment, etc.)?
- iii. Are the cases and controls matched for genetic ancestry, if not did investigators account for genetic ancestry in the analysis?
- iv. Have the cases and controls been equivalently evaluated for presence or absence of a phenotype, and/or family history of disease?
- d. *Statistical Significance* – The level of statistical significance should be weighed carefully. When an odds ratio is presented, its magnitude should be consistent with a monogenic disease etiology. When p-values or 95% confidence intervals (CI) are presented, the strength of the statistical association can be weighed in the final points assigned. Factors, such as multiple testing, that might impact that interpretation of uncorrected p-values and CIs should be considered when assigning points

| Assertion criteria                         | Genetic Evidence (0-12 points)                                                                                                                                                                                                 | Experimental Evidence (0-6 points)                                                                             | Total Points (0-18)                    | Replication Over Time (Y/N)                        |
|--------------------------------------------|--------------------------------------------------------------------------------------------------------------------------------------------------------------------------------------------------------------------------------|----------------------------------------------------------------------------------------------------------------|----------------------------------------|----------------------------------------------------|
| <b>Description</b>                         | Case-level, family segregation, or case-control data that support the gene-disease association                                                                                                                                 | Gene-level experimental evidence that support the gene-disease association                                     | Sum of Genetic & Experimental Evidence | > 2 pubs w/ convincing evidence over time (>3 yrs) |
| <b>Assigned Points</b>                     | <b>0.5</b>                                                                                                                                                                                                                     | <b>3</b>                                                                                                       | <b>3.5</b>                             | <b>NO</b>                                          |
| <b>CALCULATED CLASSIFICATION</b>           |                                                                                                                                                                                                                                | <b>LIMITED</b>                                                                                                 | <b>1-6</b>                             |                                                    |
|                                            |                                                                                                                                                                                                                                | <b>MODERATE</b>                                                                                                | <b>7-11</b>                            |                                                    |
|                                            |                                                                                                                                                                                                                                | <b>STRONG</b>                                                                                                  | <b>12-18</b>                           |                                                    |
|                                            |                                                                                                                                                                                                                                | <b>DEFINITIVE</b>                                                                                              | <b>12-18 AND replication over time</b> |                                                    |
| <b>Valid contradictory evidence (Y/N)*</b> | YES Piton A et al. 2013 Aug 8 (23871722) <sup>6</sup> ; (Piton et al. refutes the original gene-disease assertion and ExAC data demonstrates that almost all of the variants identified are common in the general population.) |                                                                                                                |                                        |                                                    |
| <b>CALCULATED CLASSIFICATION (DATE)</b>    |                                                                                                                                                                                                                                | <b>LIMITED</b>                                                                                                 |                                        |                                                    |
| <b>MODIFY CALCULATED CLASSIFICATION</b>    |                                                                                                                                                                                                                                | <b>YES</b>                                                                                                     |                                        |                                                    |
| <b>CURATOR CLASSIFICATION (DATE)</b>       |                                                                                                                                                                                                                                | <b>DISPUTED</b><br>10/10/2016                                                                                  |                                        |                                                    |
| <b>EXPERT CURATION (DATE)</b>              |                                                                                                                                                                                                                                | <b>DISPUTED</b><br>11/16/16<br>"Disputed" based on Pitton et al. 2013 <sup>6</sup> and ExAC <sup>7</sup> data. |                                        |                                                    |

**Figure S3: Summary matrix and classification for *AGTR2* and X-linked intellectual disability.**

| AKAP9 and autosomal dominant long QT syndrome |                                                |                                                                    |                                                                                     |       |       |        |       |             |                                                    |
|-----------------------------------------------|------------------------------------------------|--------------------------------------------------------------------|-------------------------------------------------------------------------------------|-------|-------|--------|-------|-------------|----------------------------------------------------|
|                                               | Evidence Type                                  | Case Information Type                                              | Guidelines                                                                          |       |       | Scores |       | PMIDs/Notes |                                                    |
|                                               |                                                |                                                                    | Default                                                                             | Range | Max   | Points | Tally |             |                                                    |
| Genetic Evidence                              | Variant Evidence                               | Autosomal Dominant or X-linked Disorder                            | Variant is de novo                                                                  |       | 2     | 0-3    | 12    |             |                                                    |
|                                               |                                                |                                                                    | Proband with predicted or proven null variant                                       |       | 1.5   | 0-2    | 10    |             |                                                    |
|                                               |                                                |                                                                    | Proband with other variant type with some evidence of gene impact                   |       | 0.5   | 0-1.5  | 7     | 0.5         | 0.5                                                |
|                                               |                                                | Autosomal Recessive Disease                                        | Two variants in trans and at least one de novo or a predicted/proven null variant   |       | 2     | 0-3    | 12    |             |                                                    |
|                                               |                                                |                                                                    | Two variants (not predicted/proven null) with some evidence of gene impact in trans |       | 1     | 0-1.5  |       |             |                                                    |
|                                               | Segregation Evidence                           | Evidence of segregation in one or more families                    | LOD Score Examples                                                                  | 3     | 5     | 0-7    | 7     |             |                                                    |
|                                               |                                                |                                                                    |                                                                                     | 2     | 4     |        |       |             |                                                    |
|                                               |                                                |                                                                    |                                                                                     | 1.5   | 3     |        |       |             |                                                    |
|                                               |                                                |                                                                    |                                                                                     | 1     | 1.5   |        |       |             |                                                    |
|                                               |                                                |                                                                    |                                                                                     |       |       |        |       |             |                                                    |
| Case-Level Data                               | Case-Control Study Type                        | Case-Control Quality Criteria                                      | Guidelines                                                                          |       |       | Scores |       | PMIDs/Notes |                                                    |
|                                               |                                                |                                                                    | Points/Study                                                                        |       | Max   | Points | Tally |             |                                                    |
|                                               | Single Variant Analysis                        | 1. Variant Detection Methodology                                   |                                                                                     | 0-6   | 12    |        |       |             |                                                    |
|                                               | Aggregate Variant Analysis                     | 2. Power<br>3. Bias and confounding<br>4. Statistical Significance |                                                                                     | 0-6   | 12    |        |       |             |                                                    |
| Total Genetic Evidence Points (Maximum 12)    |                                                |                                                                    |                                                                                     |       |       |        | 0.5   |             |                                                    |
| Experimental Evidence                         | Function                                       | Biochemical Function                                               |                                                                                     | 0.5   | 0 - 2 | 2      | 0.5   | 0.5         | Marx SO et al. 2002 Jan 18 (11799244) <sup>9</sup> |
|                                               |                                                | Protein Interaction                                                |                                                                                     | 0.5   | 0 - 2 |        |       |             |                                                    |
|                                               |                                                | Expression                                                         |                                                                                     | 0.5   | 0 - 2 |        |       |             |                                                    |
|                                               | Functional Alteration                          | Cells from affected individual                                     |                                                                                     | 1     | 0 - 2 | 2      | 1.0   | 1           | Chen L et al. 2007 Dec 26 (18093912) <sup>8</sup>  |
|                                               |                                                | Engineered cells                                                   |                                                                                     | 0.5   | 0 - 1 |        |       |             |                                                    |
|                                               | Models & Rescue                                | Animal model                                                       |                                                                                     | 2     | 0 - 4 | 4      |       |             |                                                    |
|                                               |                                                | Cell culture model system                                          |                                                                                     | 1     | 0 - 2 |        |       |             |                                                    |
|                                               |                                                | Rescue in animal model                                             |                                                                                     | 2     | 0 - 4 |        |       |             |                                                    |
|                                               |                                                | Rescue in engineered equivalent                                    |                                                                                     | 1     | 0 - 2 |        |       |             |                                                    |
|                                               | Total Experimental Evidence Points (Maximum 6) |                                                                    |                                                                                     |       |       |        |       | 1.5         |                                                    |

Figure S4: Summary of evidence supporting a relationship between *AKAP9* and autosomal dominant long QT syndrome.

| Assertion criteria                      | Genetic Evidence (0-12 points)                                                                 | Experimental Evidence (0-6 points)                                         | Total Points (0-18)                    | Replication Over Time (Y/N)                        |
|-----------------------------------------|------------------------------------------------------------------------------------------------|----------------------------------------------------------------------------|----------------------------------------|----------------------------------------------------|
| <b>Description</b>                      | Case-level, family segregation, or case-control data that support the gene-disease association | Gene-level experimental evidence that support the gene-disease association | Sum of Genetic & Experimental Evidence | > 2 pubs w/ convincing evidence over time (>3 yrs) |
| <b>Assigned Points</b>                  | <b>0.5</b>                                                                                     | <b>1.5</b>                                                                 | <b>2</b>                               | <b>NO</b>                                          |
| <b>CALCULATED CLASSIFICATION</b>        |                                                                                                | <b>LIMITED</b>                                                             | <b>1-6</b>                             |                                                    |
|                                         |                                                                                                | <b>MODERATE</b>                                                            | <b>7-11</b>                            |                                                    |
|                                         |                                                                                                | <b>STRONG</b>                                                              | <b>12-18</b>                           |                                                    |
|                                         |                                                                                                | <b>DEFINITIVE</b>                                                          | <b>12-18 AND replication over time</b> |                                                    |
| Valid contradictory evidence (Y/N)*     | NO                                                                                             |                                                                            |                                        |                                                    |
| <b>CALCULATED CLASSIFICATION (DATE)</b> |                                                                                                | <b>LIMITED</b><br>04/05/16                                                 |                                        |                                                    |
| <b>EXPERT CURATION (DATE)</b>           |                                                                                                | <b>LIMITED</b><br>12/15/16                                                 |                                        |                                                    |

**Figure S5: Summary matrix and classification for *AKAP9* and autosomal dominant long QT syndrome.**

**ARSD and chondrodysplasia punctata**

| Evidence Type                                  |                       | Case Information Type          |                                                                                                        | Guidelines                                                        |       |        | Scores |             | PMIDs/Notes                                                         |   |
|------------------------------------------------|-----------------------|--------------------------------|--------------------------------------------------------------------------------------------------------|-------------------------------------------------------------------|-------|--------|--------|-------------|---------------------------------------------------------------------|---|
|                                                |                       |                                |                                                                                                        | Default                                                           | Range | Max    | Points | Tally       |                                                                     |   |
| Genetic Evidence                               | Case-Level Data       | Variant Evidence               | Autosomal Dominant or X-linked Disorder                                                                | Variant is de novo                                                |       | 2      | 0-3    | 12          | 0.0                                                                 |   |
|                                                |                       |                                |                                                                                                        | Proband with predicted or proven null variant                     |       | 1.5    | 0-2    | 10          | 0.0                                                                 |   |
|                                                |                       |                                |                                                                                                        | Proband with other variant type with some evidence of gene impact |       | 0.5    | 0-1.5  | 7           | 0.0                                                                 | 0 |
|                                                |                       | Autosomal Recessive Disease    | Two variants in trans and at least one de novo or a predicted/proven null variant                      |                                                                   | 2     | 0-3    | 12     | 0.0         | 0                                                                   |   |
|                                                |                       |                                | Two variants (not predicted/proven null) with some evidence of gene impact in trans                    |                                                                   | 1     | 0-1.5  |        |             |                                                                     |   |
| Genetic Evidence                               | Case-Level Data       | Segregation Evidence           | Evidence of segregation in one or more families                                                        | LOD Score Examples                                                | 3     | 5      | 0-7    | 7           | 0.0                                                                 |   |
|                                                |                       |                                |                                                                                                        |                                                                   | 2     | 4      |        |             |                                                                     |   |
|                                                |                       |                                |                                                                                                        |                                                                   | 1.5   | 3      |        |             |                                                                     |   |
|                                                |                       |                                |                                                                                                        |                                                                   | 1     | 1.5    |        |             |                                                                     |   |
|                                                |                       |                                |                                                                                                        |                                                                   |       |        |        |             |                                                                     |   |
| Genetic Evidence                               | Case-Control Data     | Case-Control Study Type        | Case-Control Quality Criteria                                                                          | Guidelines                                                        |       |        | Scores |             | PMIDs/Notes                                                         |   |
|                                                |                       |                                |                                                                                                        | Points/Study                                                      | Max   | Points | Tally  |             |                                                                     |   |
|                                                |                       | Single Variant Analysis        | 1. Variant Detection Methodology<br>2. Power<br>3. Bias and confounding<br>4. Statistical Significance | 0-6                                                               |       | 12     | 0.0    |             |                                                                     |   |
|                                                |                       |                                |                                                                                                        | 0-6                                                               |       | 12     | 0.0    |             |                                                                     |   |
| Total Genetic Evidence Points (Maximum 12)     |                       |                                |                                                                                                        |                                                                   |       |        |        | 0           | No reports of variants in this gene associated with this condition. |   |
| Experimental Evidence                          | Evidence Category     | Evidence Type                  | Guidelines                                                                                             |                                                                   |       | Scores |        | PMIDs/Notes |                                                                     |   |
|                                                |                       |                                | Default                                                                                                | Range                                                             | Max   | Points | Tally  |             |                                                                     |   |
|                                                | Function              | Biochemical Function           | 0.5                                                                                                    | 0 - 2                                                             | 2     |        |        |             |                                                                     |   |
|                                                |                       | Protein Interaction            | 0.5                                                                                                    | 0 - 2                                                             |       |        |        |             |                                                                     |   |
|                                                |                       | Expression                     | 0.5                                                                                                    | 0 - 2                                                             |       |        |        |             |                                                                     |   |
|                                                | Functional Alteration | Cells from affected individual | 1                                                                                                      | 0 - 2                                                             | 2     |        |        |             |                                                                     |   |
|                                                |                       | Engineered cells               | 0.5                                                                                                    | 0 - 1                                                             |       |        |        |             |                                                                     |   |
|                                                | Models & Rescue       | Animal model                   | 2                                                                                                      | 0 - 4                                                             | 4     |        |        |             |                                                                     |   |
|                                                |                       | Cell culture model system      | 1                                                                                                      | 0 - 2                                                             |       |        |        |             |                                                                     |   |
|                                                |                       | Rescue in animal model         | 2                                                                                                      | 0 - 4                                                             |       |        |        |             |                                                                     |   |
| Rescue in engineered equivalent                |                       | 1                              | 0 - 2                                                                                                  |                                                                   |       |        |        |             |                                                                     |   |
| Total Experimental Evidence Points (Maximum 6) |                       |                                |                                                                                                        |                                                                   |       |        |        | 0           |                                                                     |   |

**Figure S6: Summary of evidence supporting a relationship between ARSD and chondrodysplasia punctata.**



| Assertion criteria                      | Genetic Evidence (0-12 points)                                                                 | Experimental Evidence (0-6 points)                                         | Total Points (0-18)                    | Replication Over Time (Y/N)                        |
|-----------------------------------------|------------------------------------------------------------------------------------------------|----------------------------------------------------------------------------|----------------------------------------|----------------------------------------------------|
| <b>Description</b>                      | Case-level, family segregation, or case-control data that support the gene-disease association | Gene-level experimental evidence that support the gene-disease association | Sum of Genetic & Experimental Evidence | > 2 pubs w/ convincing evidence over time (>3 yrs) |
| <b>Assigned Points</b>                  |                                                                                                | <b>0</b>                                                                   | <b>0</b>                               | <b>NO</b>                                          |
| <b>CALCULATED CLASSIFICATION</b>        |                                                                                                | <b>LIMITED</b>                                                             | <b>1-6</b>                             |                                                    |
|                                         |                                                                                                | <b>MODERATE</b>                                                            | <b>7-11</b>                            |                                                    |
|                                         |                                                                                                | <b>STRONG</b>                                                              | <b>12-18</b>                           |                                                    |
|                                         |                                                                                                | <b>DEFINITIVE</b>                                                          | <b>12-18 AND replication over time</b> |                                                    |
| Valid contradictory evidence (Y/N)*     | NO                                                                                             |                                                                            |                                        |                                                    |
| <b>CALCULATED CLASSIFICATION (DATE)</b> |                                                                                                | <b>NO REPORTED EVIDENCE</b><br>07/14/2016                                  |                                        |                                                    |
| <b>EXPERT CURATION (DATE)</b>           |                                                                                                | <b>NO REPORTED EVIDENCE</b><br>11/15/16                                    |                                        |                                                    |

**Figure S7: Summary matrix and classification for *ARSD* and chondrodysplasia punctata.**

## ATF6 and autosomal recessive achromatopsia

| Evidence Type                                         |                                                 | Case Information Type         |                                                                                                        | Guidelines                                                        |        |        | Scores |                                                  | PMIDs/Notes                                                                              |
|-------------------------------------------------------|-------------------------------------------------|-------------------------------|--------------------------------------------------------------------------------------------------------|-------------------------------------------------------------------|--------|--------|--------|--------------------------------------------------|------------------------------------------------------------------------------------------|
|                                                       |                                                 |                               |                                                                                                        | Default                                                           | Range  | Max    | Points | Tally                                            |                                                                                          |
| Genetic Evidence                                      | Case-Level Data                                 | Variant Evidence              | Autosomal Dominant or X-linked Disorder                                                                | Variant is de novo                                                | 2      | 0-3    | 12     |                                                  |                                                                                          |
|                                                       |                                                 |                               |                                                                                                        | Proband with predicted or proven null variant                     | 1.5    | 0-2    | 10     |                                                  |                                                                                          |
|                                                       |                                                 |                               |                                                                                                        | Proband with other variant type with some evidence of gene impact | 0.5    | 0-1.5  | 7      |                                                  |                                                                                          |
|                                                       |                                                 | Autosomal Recessive Disease   | Two variants in trans and at least one de novo or a predicted/proven null variant                      | 2                                                                 | 0-3    | 12     | 9.0    | 12                                               | Ansar M et al. 2015 Sep (26063662); Kohli S et al. 2015 Jul (26029869) <sup>10; 11</sup> |
|                                                       |                                                 |                               | Two variants (not predicted/proven null) with some evidence of gene impact in trans                    | 1                                                                 | 0-1.5  |        |        |                                                  |                                                                                          |
| Segregation Evidence                                  | Evidence of segregation in one or more families | LOD Score Examples            | 3                                                                                                      | 5                                                                 | 0-7    | 7      | 7.0    | 7                                                | Ansar M et al. 2015 Sep (26063662); Kohli S et al. 2015 Jul (26029869) <sup>10; 11</sup> |
|                                                       |                                                 |                               | 2                                                                                                      | 4                                                                 |        |        |        |                                                  |                                                                                          |
|                                                       |                                                 |                               | 1.5                                                                                                    | 3                                                                 |        |        |        |                                                  |                                                                                          |
|                                                       |                                                 |                               | 1                                                                                                      | 1.5                                                               |        |        |        |                                                  |                                                                                          |
|                                                       |                                                 |                               |                                                                                                        |                                                                   |        |        |        |                                                  |                                                                                          |
| Case-Control Data                                     | Case-Control Study Type                         | Case-Control Quality Criteria | Guidelines                                                                                             |                                                                   |        | Scores |        | PMIDs/Notes                                      |                                                                                          |
|                                                       |                                                 |                               | Points/Study                                                                                           | Max                                                               | Points | Tally  |        |                                                  |                                                                                          |
|                                                       | Single Variant Analysis                         | Aggregate Variant Analysis    | 1. Variant Detection Methodology<br>2. Power<br>3. Bias and confounding<br>4. Statistical Significance | 0-6                                                               |        | 12     |        |                                                  |                                                                                          |
|                                                       |                                                 |                               |                                                                                                        | 0-6                                                               |        | 12     |        |                                                  |                                                                                          |
| <b>Total Genetic Evidence Points (Maximum 12)</b>     |                                                 |                               |                                                                                                        |                                                                   |        |        |        | <b>14</b>                                        |                                                                                          |
| Experimental Evidence                                 | Function                                        | Biochemical Function          | 0.5                                                                                                    | 0 - 2                                                             | 2      | 0.5    | 0.5    | Ansar M et al. 2015 Sep (26063662) <sup>11</sup> |                                                                                          |
|                                                       |                                                 |                               | 0.5                                                                                                    | 0 - 2                                                             |        |        |        |                                                  |                                                                                          |
|                                                       | Functional Alteration                           | Expression                    | Cells from affected individual                                                                         | 1                                                                 | 0 - 2  | 2      | 0.5    | 0.5                                              | Ansar M et al. 2015 Sep (26063662) <sup>11</sup>                                         |
|                                                       |                                                 |                               | Engineered cells                                                                                       | 0.5                                                               | 0 - 1  |        |        |                                                  |                                                                                          |
|                                                       | Models & Rescue                                 | Animal model                  | 2                                                                                                      | 0 - 4                                                             | 4      | 1.0    | 1      | Kohli S et al. 2015 Jul (26029869) <sup>10</sup> |                                                                                          |
| Cell culture model system                             |                                                 |                               | 1                                                                                                      | 0 - 2                                                             |        |        |        |                                                  |                                                                                          |
| Rescue in animal model                                |                                                 |                               | 2                                                                                                      | 0 - 4                                                             |        |        |        |                                                  |                                                                                          |
| Rescue in engineered equivalent                       |                                                 |                               | 1                                                                                                      | 0 - 2                                                             |        |        |        |                                                  |                                                                                          |
| <b>Total Experimental Evidence Points (Maximum 6)</b> |                                                 |                               |                                                                                                        |                                                                   |        |        |        | <b>2</b>                                         |                                                                                          |

**Figure S8: Summary of evidence supporting a relationship between ATF6 and autosomal recessive achromatopsia.**

| Assertion criteria                      | Genetic Evidence (0-12 points)                                                                 | Experimental Evidence (0-6 points)                                         | Total Points (0-18)                    | Replication Over Time (Y/N)                        |
|-----------------------------------------|------------------------------------------------------------------------------------------------|----------------------------------------------------------------------------|----------------------------------------|----------------------------------------------------|
| <b>Description</b>                      | Case-level, family segregation, or case-control data that support the gene-disease association | Gene-level experimental evidence that support the gene-disease association | Sum of Genetic & Experimental Evidence | > 2 pubs w/ convincing evidence over time (>3 yrs) |
| <b>Assigned Points</b>                  | <b>12</b>                                                                                      | <b>2</b>                                                                   | <b>14</b>                              | <b>NO</b>                                          |
| <b>CALCULATED CLASSIFICATION</b>        |                                                                                                | <b>LIMITED</b>                                                             | <b>1-6</b>                             |                                                    |
|                                         |                                                                                                | <b>MODERATE</b>                                                            | <b>7-11</b>                            |                                                    |
|                                         |                                                                                                | <b>STRONG</b>                                                              | <b>12-18</b>                           |                                                    |
|                                         |                                                                                                | <b>DEFINITIVE</b>                                                          | <b>12-18 AND replication over time</b> |                                                    |
| Valid contradictory evidence (Y/N)*     | NO                                                                                             |                                                                            |                                        |                                                    |
| <b>CALCULATED CLASSIFICATION (DATE)</b> |                                                                                                | <b>STRONG</b><br>06/01/2016                                                |                                        |                                                    |
| <b>EXPERT CURATION (DATE)</b>           |                                                                                                | <b>STRONG</b><br>11/16/2016                                                |                                        |                                                    |

**Figure S9: Summary matrix and classification for *ATF6* and autosomal recessive achromatopsia.**

| <b>BAG3 and autosomal dominant myofibrillar myopathy</b> |                                   |                                                        |                                                 |                                                                                     |               |               |                    |                                                                                               |                    |                                                                                                                                                                                                                                                                                                 |
|----------------------------------------------------------|-----------------------------------|--------------------------------------------------------|-------------------------------------------------|-------------------------------------------------------------------------------------|---------------|---------------|--------------------|-----------------------------------------------------------------------------------------------|--------------------|-------------------------------------------------------------------------------------------------------------------------------------------------------------------------------------------------------------------------------------------------------------------------------------------------|
| <b>Genetic Evidence</b>                                  | <b>Case-Level Data</b>            | <b>Evidence Type</b>                                   | <b>Case Information Type</b>                    | <b>Guidelines</b>                                                                   |               |               | <b>Scores</b>      |                                                                                               | <b>PMIDs/Notes</b> |                                                                                                                                                                                                                                                                                                 |
|                                                          |                                   |                                                        |                                                 | <b>Default</b>                                                                      | <b>Range</b>  | <b>Max</b>    | <b>Points</b>      | <b>Tally</b>                                                                                  |                    |                                                                                                                                                                                                                                                                                                 |
|                                                          |                                   | <b>Variant Evidence</b>                                | <b>Autosomal Dominant or X-linked Disorder</b>  | Variant is de novo                                                                  | 2             | 0-3           | 12                 |                                                                                               |                    |                                                                                                                                                                                                                                                                                                 |
|                                                          |                                   |                                                        |                                                 | Proband with predicted or proven null variant                                       | 1.5           | 0-2           | 10                 |                                                                                               |                    |                                                                                                                                                                                                                                                                                                 |
|                                                          |                                   |                                                        |                                                 | Proband with other variant type with some evidence of gene impact                   | 0.5           | 0-1.5         | 7                  | 7.0                                                                                           | 7                  | Seicen D et al. 2009 Jan (19085932); Odgerel Z et al. 2010 Jul (20605452); Semmler AL et al. 2014 Aug 1 (25208129); Konersman CG et al. 2015 May (25728519); Kostera-Pruszczyk A et al. 2015 Dec (26545904); D et al. 2016 Jun (27443559); Ja//er F et al. 2012 Jun (22734908) <sup>12-18</sup> |
|                                                          |                                   |                                                        | <b>Autosomal Recessive Disease</b>              | Two variants in trans and at least one de novo or a predicted/proven null variant   | 2             | 0-3           | 12                 |                                                                                               |                    |                                                                                                                                                                                                                                                                                                 |
|                                                          |                                   |                                                        |                                                 | Two variants (not predicted/proven null) with some evidence of gene impact in trans | 1             | 0-1.5         |                    |                                                                                               |                    |                                                                                                                                                                                                                                                                                                 |
|                                                          |                                   | <b>Segregation Evidence</b>                            | Evidence of segregation in one or more families | LOD Score Examples                                                                  | 3             | 5             | 0-7                | 7                                                                                             |                    |                                                                                                                                                                                                                                                                                                 |
|                                                          |                                   |                                                        |                                                 |                                                                                     | 2             | 4             |                    |                                                                                               |                    |                                                                                                                                                                                                                                                                                                 |
|                                                          |                                   |                                                        |                                                 |                                                                                     | 1.5           | 3             |                    |                                                                                               |                    |                                                                                                                                                                                                                                                                                                 |
| 1                                                        | 1.5                               |                                                        |                                                 |                                                                                     |               |               |                    |                                                                                               |                    |                                                                                                                                                                                                                                                                                                 |
|                                                          |                                   |                                                        |                                                 |                                                                                     |               |               |                    |                                                                                               |                    |                                                                                                                                                                                                                                                                                                 |
| <b>Case-Control Data</b>                                 | <b>Case-Control Study Type</b>    | <b>Case-Control Quality Criteria</b>                   | <b>Guidelines</b>                               |                                                                                     | <b>Scores</b> |               | <b>PMIDs/Notes</b> |                                                                                               |                    |                                                                                                                                                                                                                                                                                                 |
|                                                          |                                   |                                                        | <b>Points/Study</b>                             | <b>Max</b>                                                                          | <b>Points</b> | <b>Tally</b>  |                    |                                                                                               |                    |                                                                                                                                                                                                                                                                                                 |
|                                                          | <b>Single Variant Analysis</b>    | 1. Variant Detection Methodology<br>2. Power           | 0-6                                             | 12                                                                                  |               |               |                    |                                                                                               |                    |                                                                                                                                                                                                                                                                                                 |
|                                                          | <b>Aggregate Variant Analysis</b> | 3. Bias and confounding<br>4. Statistical Significance | 0-6                                             | 12                                                                                  |               |               |                    |                                                                                               |                    |                                                                                                                                                                                                                                                                                                 |
| <b>Total Genetic Evidence Points (Maximum 12)</b>        |                                   |                                                        |                                                 |                                                                                     |               |               | <b>7</b>           |                                                                                               |                    |                                                                                                                                                                                                                                                                                                 |
| <b>Experimental Evidence</b>                             | <b>Evidence Category</b>          | <b>Evidence Type</b>                                   | <b>Guidelines</b>                               |                                                                                     |               | <b>Scores</b> |                    | <b>PMIDs/Notes</b>                                                                            |                    |                                                                                                                                                                                                                                                                                                 |
|                                                          |                                   |                                                        | <b>Default</b>                                  | <b>Range</b>                                                                        | <b>Max</b>    | <b>Points</b> | <b>Tally</b>       |                                                                                               |                    |                                                                                                                                                                                                                                                                                                 |
|                                                          | <b>Function</b>                   | Biochemical Function                                   | 0.5                                             | 0 - 2                                                                               | 2             | 1.0           | 1                  | Homma S et al. 2006 Sep (16936253); Seicen D et al. 2009 Jan (19085932) <sup>12; 19</sup>     |                    |                                                                                                                                                                                                                                                                                                 |
|                                                          |                                   | Protein Interaction                                    | 0.5                                             | 0 - 2                                                                               |               |               |                    |                                                                                               |                    |                                                                                                                                                                                                                                                                                                 |
|                                                          |                                   | Expression                                             | 0.5                                             | 0 - 2                                                                               |               |               |                    |                                                                                               |                    |                                                                                                                                                                                                                                                                                                 |
|                                                          | <b>Functional Alteration</b>      | Cells from affected individual                         | 1                                               | 0 - 2                                                                               | 2             |               |                    |                                                                                               |                    |                                                                                                                                                                                                                                                                                                 |
|                                                          |                                   | Engineered cells                                       | 0.5                                             | 0 - 1                                                                               |               |               |                    |                                                                                               |                    |                                                                                                                                                                                                                                                                                                 |
|                                                          | <b>Models &amp; Rescue</b>        | Animal model                                           | 2                                               | 0 - 4                                                                               | 4             | 6.0           | 4                  | Homma S et al. 2006 Sep (16936253); Hishiya A et al. 2010 Nov 12 (20884878) <sup>19; 20</sup> |                    |                                                                                                                                                                                                                                                                                                 |
|                                                          |                                   | Cell culture model system                              | 1                                               | 0 - 2                                                                               |               |               |                    |                                                                                               |                    |                                                                                                                                                                                                                                                                                                 |
|                                                          |                                   | Rescue in animal model                                 | 2                                               | 0 - 4                                                                               |               |               |                    |                                                                                               |                    |                                                                                                                                                                                                                                                                                                 |
| Rescue in engineered equivalent                          |                                   | 1                                                      | 0 - 2                                           |                                                                                     |               |               |                    |                                                                                               |                    |                                                                                                                                                                                                                                                                                                 |
| <b>Total Experimental Evidence Points (Maximum 6)</b>    |                                   |                                                        |                                                 |                                                                                     |               |               | <b>5</b>           |                                                                                               |                    |                                                                                                                                                                                                                                                                                                 |

**Figure S10: Summary of evidence supporting a relationship between BAG3 and autosomal dominant myofibrillar myopathy.**

| Assertion criteria                      | Genetic Evidence (0-12 points)                                                                 | Experimental Evidence (0-6 points)                                         | Total Points (0-18)                    | Replication Over Time (Y/N)                        |
|-----------------------------------------|------------------------------------------------------------------------------------------------|----------------------------------------------------------------------------|----------------------------------------|----------------------------------------------------|
| <b>Description</b>                      | Case-level, family segregation, or case-control data that support the gene-disease association | Gene-level experimental evidence that support the gene-disease association | Sum of Genetic & Experimental Evidence | > 2 pubs w/ convincing evidence over time (>3 yrs) |
| <b>Assigned Points</b>                  | <b>7</b>                                                                                       | <b>5</b>                                                                   | <b>12</b>                              | <b>YES</b>                                         |
| <b>CALCULATED CLASSIFICATION</b>        |                                                                                                | <b>LIMITED</b>                                                             | <b>1-6</b>                             |                                                    |
|                                         |                                                                                                | <b>MODERATE</b>                                                            | <b>7-11</b>                            |                                                    |
|                                         |                                                                                                | <b>STRONG</b>                                                              | <b>12-18</b>                           |                                                    |
|                                         |                                                                                                | <b>DEFINITIVE</b>                                                          | <b>12-18 AND replication over time</b> |                                                    |
| Valid contradictory evidence (Y/N)*     | NO                                                                                             |                                                                            |                                        |                                                    |
| <b>CALCULATED CLASSIFICATION (DATE)</b> |                                                                                                | <b>DEFINITIVE</b>                                                          |                                        |                                                    |
| <b>EXPERT CURATION (DATE)</b>           |                                                                                                | <b>DEFINITIVE</b><br>12/18/2016                                            |                                        |                                                    |

**Figure S11: Summary matrix and classification for *BAG3* and autosomal dominant myofibrillar myopathy.**

**C1QB and autosomal recessive immunodeficiency due to an early component of complement deficiency**

| Evidence Type                                  |                                                                                     | Case Information Type                                                                                  |                                                                                   | Guidelines                                                        |       |     | Scores |       | PMIDs/Notes                                                                                                                                                                                                                                                              |                                                                                                                                                                                                                                                             |
|------------------------------------------------|-------------------------------------------------------------------------------------|--------------------------------------------------------------------------------------------------------|-----------------------------------------------------------------------------------|-------------------------------------------------------------------|-------|-----|--------|-------|--------------------------------------------------------------------------------------------------------------------------------------------------------------------------------------------------------------------------------------------------------------------------|-------------------------------------------------------------------------------------------------------------------------------------------------------------------------------------------------------------------------------------------------------------|
|                                                |                                                                                     |                                                                                                        |                                                                                   | Default                                                           | Range | Max | Points | Tally |                                                                                                                                                                                                                                                                          |                                                                                                                                                                                                                                                             |
| Genetic Evidence                               | Case-Level Data                                                                     | Variant Evidence                                                                                       | Autosomal Dominant or X-linked Disorder                                           | Variant is de novo                                                |       | 2   | 0-3    | 12    |                                                                                                                                                                                                                                                                          |                                                                                                                                                                                                                                                             |
|                                                |                                                                                     |                                                                                                        |                                                                                   | Proband with predicted or proven null variant                     |       | 1.5 | 0-2    | 10    |                                                                                                                                                                                                                                                                          |                                                                                                                                                                                                                                                             |
|                                                |                                                                                     |                                                                                                        |                                                                                   | Proband with other variant type with some evidence of gene impact |       | 0.5 | 0-1.5  | 7     |                                                                                                                                                                                                                                                                          |                                                                                                                                                                                                                                                             |
|                                                |                                                                                     | Autosomal Recessive Disease                                                                            | Two variants in trans and at least one de novo or a predicted/proven null variant |                                                                   | 2     | 0-3 | 12     | 8.0   | 10                                                                                                                                                                                                                                                                       | Petry F et al. 1997 Dec (9476130); Marquart HV et al. 2007 Jul (17513176); McAdam RA et al. 1988 (2894352); Troedson C et al. 2013 May (23651859); Higuchi Y et al. 2013 Oct 28 (24160257); van Schaarenburg RA et al. 2015 Mar (25454803) <sup>21-26</sup> |
|                                                | Two variants (not predicted/proven null) with some evidence of gene impact in trans |                                                                                                        | 1                                                                                 | 0-1.5                                                             | 2.0   |     |        |       |                                                                                                                                                                                                                                                                          |                                                                                                                                                                                                                                                             |
| Segregation Evidence                           | Evidence of segregation in one or more families                                     | LOD Score Examples                                                                                     | 3                                                                                 | 5                                                                 | 0-7   | 7   | 3.5    | 3.5   | Marquart HV et al. 2007 Jul (17513176); Higuchi Y et al. 2013 Oct 28 (24160257) <sup>23, 25</sup>                                                                                                                                                                        |                                                                                                                                                                                                                                                             |
|                                                |                                                                                     |                                                                                                        | 2                                                                                 | 4                                                                 |       |     |        |       |                                                                                                                                                                                                                                                                          |                                                                                                                                                                                                                                                             |
|                                                |                                                                                     |                                                                                                        | 1.5                                                                               | 3                                                                 |       |     |        |       |                                                                                                                                                                                                                                                                          |                                                                                                                                                                                                                                                             |
|                                                |                                                                                     |                                                                                                        | 1                                                                                 | 1.5                                                               |       |     |        |       |                                                                                                                                                                                                                                                                          |                                                                                                                                                                                                                                                             |
|                                                |                                                                                     |                                                                                                        |                                                                                   |                                                                   |       |     |        |       |                                                                                                                                                                                                                                                                          |                                                                                                                                                                                                                                                             |
| Case-Control Data                              | Case-Control Study Type                                                             | Case-Control Quality Criteria                                                                          |                                                                                   | Guidelines                                                        |       |     | Scores |       | PMIDs/Notes                                                                                                                                                                                                                                                              |                                                                                                                                                                                                                                                             |
|                                                | Single Variant Analysis                                                             | 1. Variant Detection Methodology<br>2. Power<br>3. Bias and confounding<br>4. Statistical Significance |                                                                                   | Points/Study                                                      |       | Max | Points | Tally |                                                                                                                                                                                                                                                                          |                                                                                                                                                                                                                                                             |
|                                                |                                                                                     |                                                                                                        |                                                                                   | 0-6                                                               |       | 12  |        |       |                                                                                                                                                                                                                                                                          |                                                                                                                                                                                                                                                             |
|                                                |                                                                                     |                                                                                                        |                                                                                   | 0-6                                                               |       | 12  |        |       |                                                                                                                                                                                                                                                                          |                                                                                                                                                                                                                                                             |
| Aggregate Variant Analysis                     |                                                                                     |                                                                                                        |                                                                                   |                                                                   |       |     |        |       |                                                                                                                                                                                                                                                                          |                                                                                                                                                                                                                                                             |
| Total Genetic Evidence Points (Maximum 12)     |                                                                                     |                                                                                                        |                                                                                   |                                                                   |       |     |        | 12    |                                                                                                                                                                                                                                                                          |                                                                                                                                                                                                                                                             |
| Experimental Evidence                          | Function                                                                            | Biochemical Function                                                                                   |                                                                                   | 0.5                                                               | 0 - 2 | 2   | 1.0    | 1     | van Schaarenburg RA et al. 2015 Mar (25454803); Higuchi Y et al. 2013 Oct 28 (24160257); McAdam RA et al. 1988 (2894352); Petry F et al. 1997 Dec (9476130); Marquart HV et al. 2007 Jul (17513176); van Schaarenburg RA et al. 2015 Mar (25454803) <sup>21-24, 26</sup> |                                                                                                                                                                                                                                                             |
|                                                |                                                                                     | Protein Interaction                                                                                    |                                                                                   | 0.5                                                               | 0 - 2 |     |        |       |                                                                                                                                                                                                                                                                          |                                                                                                                                                                                                                                                             |
|                                                |                                                                                     | Expression                                                                                             |                                                                                   | 0.5                                                               | 0 - 2 |     |        |       |                                                                                                                                                                                                                                                                          |                                                                                                                                                                                                                                                             |
|                                                | Functional Alteration                                                               | Cells from affected individual                                                                         |                                                                                   | 1                                                                 | 0 - 2 | 2   | 2.0    | 2     | McAdam RA et al. 1988 (2894352) <sup>21</sup>                                                                                                                                                                                                                            |                                                                                                                                                                                                                                                             |
|                                                |                                                                                     | Engineered cells                                                                                       |                                                                                   | 0.5                                                               | 0 - 1 |     |        |       |                                                                                                                                                                                                                                                                          |                                                                                                                                                                                                                                                             |
|                                                | Models & Rescue                                                                     | Animal model                                                                                           |                                                                                   | 2                                                                 | 0 - 4 | 4   | 2.0    | 2     | Miura-Shimura Y et al. 2002 Aug 1 (12133956) <sup>27</sup>                                                                                                                                                                                                               |                                                                                                                                                                                                                                                             |
|                                                |                                                                                     | Cell culture model system                                                                              |                                                                                   | 1                                                                 | 0 - 2 |     |        |       |                                                                                                                                                                                                                                                                          |                                                                                                                                                                                                                                                             |
|                                                |                                                                                     | Rescue in animal model                                                                                 |                                                                                   | 2                                                                 | 0 - 4 |     |        |       |                                                                                                                                                                                                                                                                          |                                                                                                                                                                                                                                                             |
| Rescue in engineered equivalent                |                                                                                     | 1                                                                                                      | 0 - 2                                                                             |                                                                   |       |     |        |       |                                                                                                                                                                                                                                                                          |                                                                                                                                                                                                                                                             |
| Total Experimental Evidence Points (Maximum 6) |                                                                                     |                                                                                                        |                                                                                   |                                                                   |       |     |        | 5     |                                                                                                                                                                                                                                                                          |                                                                                                                                                                                                                                                             |

**Figure S12: Summary of evidence supporting a relationship between C1QB and autosomal recessive immunodeficiency due to an early component of complement deficiency.**

| Assertion criteria                  | Genetic Evidence (0-12 points)                                                                 | Experimental Evidence (0-6 points)                                         | Total Points (0-18)                    | Replication Over Time (Y/N)                        |
|-------------------------------------|------------------------------------------------------------------------------------------------|----------------------------------------------------------------------------|----------------------------------------|----------------------------------------------------|
| <b>Description</b>                  | Case-level, family segregation, or case-control data that support the gene-disease association | Gene-level experimental evidence that support the gene-disease association | Sum of Genetic & Experimental Evidence | > 2 pubs w/ convincing evidence over time (>3 yrs) |
| <b>Assigned Points</b>              | <b>12</b>                                                                                      | <b>5</b>                                                                   | <b>17</b>                              | <b>YES</b>                                         |
| <b>CALCULATED CLASSIFICATION</b>    |                                                                                                | <b>LIMITED</b>                                                             | <b>1-6</b>                             |                                                    |
|                                     |                                                                                                | <b>MODERATE</b>                                                            | <b>7-11</b>                            |                                                    |
|                                     |                                                                                                | <b>STRONG</b>                                                              | <b>12-18</b>                           |                                                    |
|                                     |                                                                                                | <b>DEFINITIVE</b>                                                          | <b>12-18 AND replication over time</b> |                                                    |
| Valid contradictory evidence (Y/N)* | NO                                                                                             |                                                                            |                                        |                                                    |
|                                     | <b>CALCULATED CLASSIFICATION (DATE)</b>                                                        | <b>DEFINITIVE</b><br>06/13/2016                                            |                                        |                                                    |
|                                     | <b>EXPERT CURATION (DATE)</b>                                                                  | <b>DEFINITIVE</b><br>01/09/2017                                            |                                        |                                                    |

**Figure S13: Summary matrix and classification for *C1QB* and autosomal recessive immunodeficiency due to an early component of complement deficiency.**

**CD3E and autosomal recessive severe combined immunodeficiency**

| Evidence Type                                  |                                                                                     | Case Information Type                        |                                                                                   | Guidelines                                                        |        |        | Scores                                                     |                                                                                                                                    | PMIDs/Notes                                                                                                                              |
|------------------------------------------------|-------------------------------------------------------------------------------------|----------------------------------------------|-----------------------------------------------------------------------------------|-------------------------------------------------------------------|--------|--------|------------------------------------------------------------|------------------------------------------------------------------------------------------------------------------------------------|------------------------------------------------------------------------------------------------------------------------------------------|
|                                                |                                                                                     |                                              |                                                                                   | Default                                                           | Range  | Max    | Points                                                     | Tally                                                                                                                              |                                                                                                                                          |
| Genetic Evidence                               | Case-Level Data                                                                     | Variant Evidence                             | Autosomal Dominant or X-linked Disorder                                           | Variant is de novo                                                | 2      | 0-3    | 12                                                         |                                                                                                                                    |                                                                                                                                          |
|                                                |                                                                                     |                                              |                                                                                   | Proband with predicted or proven null variant                     | 1.5    | 0-2    | 10                                                         |                                                                                                                                    |                                                                                                                                          |
|                                                |                                                                                     |                                              |                                                                                   | Proband with other variant type with some evidence of gene impact | 0.5    | 0-1.5  | 7                                                          |                                                                                                                                    |                                                                                                                                          |
|                                                |                                                                                     | Autosomal Recessive Disease                  | Two variants in trans and at least one de novo or a predicted/proven null variant | 2                                                                 | 0-3    | 12     | 6.0                                                        | 6                                                                                                                                  | Soudais C et al. 1993 Jan (8490660); de Saint Basile G et al. 2004 Nov (15546002); Fuehrer M et al. 2014 May (24515816) <sup>28-30</sup> |
|                                                | Two variants (not predicted/proven null) with some evidence of gene impact in trans |                                              | 1                                                                                 | 0-1.5                                                             |        |        |                                                            |                                                                                                                                    |                                                                                                                                          |
| Segregation Evidence                           | Evidence of segregation in one or more families                                     | LOD Score Examples                           | 3<br>2<br>1.5<br>1                                                                | 5<br>4<br>3<br>1.5                                                | 0-7    | 7      | 0.0                                                        | 0                                                                                                                                  |                                                                                                                                          |
| Case-Control Data                              | Case-Control Study Type                                                             | Case-Control Quality Criteria                | Guidelines                                                                        |                                                                   |        | Scores |                                                            | PMIDs/Notes                                                                                                                        |                                                                                                                                          |
|                                                |                                                                                     |                                              | Points/Study                                                                      | Max                                                               | Points | Tally  |                                                            |                                                                                                                                    |                                                                                                                                          |
|                                                | Single Variant Analysis                                                             | 1. Variant Detection Methodology<br>2. Power | 0-6                                                                               | 12                                                                |        |        |                                                            |                                                                                                                                    |                                                                                                                                          |
| Aggregate Variant Analysis                     | 3. Bias and confounding<br>4. Statistical Significance                              | 0-6                                          | 12                                                                                |                                                                   |        |        |                                                            |                                                                                                                                    |                                                                                                                                          |
| Total Genetic Evidence Points (Maximum 12)     |                                                                                     |                                              |                                                                                   |                                                                   |        |        | 6                                                          |                                                                                                                                    |                                                                                                                                          |
| Experimental Evidence                          | Evidence Category                                                                   | Evidence Type                                | Guidelines                                                                        |                                                                   |        | Scores |                                                            | PMIDs/Notes                                                                                                                        |                                                                                                                                          |
|                                                |                                                                                     |                                              | Default                                                                           | Range                                                             | Max    | Points | Tally                                                      |                                                                                                                                    |                                                                                                                                          |
|                                                | Function                                                                            | Biochemical Function                         | 0.5                                                                               | 0 - 2                                                             | 2      | 1.5    | 1.5                                                        | Manolios N et al. 1991 Jul (1828760); Thoenes G et al. 1992 Jan 5 (1370449); Fuehrer M et al. 2014 May (24515816) <sup>30-32</sup> |                                                                                                                                          |
|                                                |                                                                                     | Protein Interaction                          | 0.5                                                                               | 0 - 2                                                             |        |        |                                                            |                                                                                                                                    |                                                                                                                                          |
|                                                |                                                                                     | Expression                                   | 0.5                                                                               | 0 - 2                                                             |        |        |                                                            |                                                                                                                                    |                                                                                                                                          |
| Functional Alteration                          | Cells from affected individual                                                      | 1                                            | 0 - 2                                                                             | 2                                                                 | 2.0    | 2      | de Saint Basile G et al. 2004 Nov (15546002) <sup>29</sup> |                                                                                                                                    |                                                                                                                                          |
|                                                | Engineered cells                                                                    | 0.5                                          | 0 - 1                                                                             |                                                                   |        |        |                                                            |                                                                                                                                    |                                                                                                                                          |
| Models & Rescue                                | Animal model                                                                        | 2                                            | 0 - 4                                                                             | 4                                                                 | 2.0    | 2      | Wang B et al. 1994 Sep 27 (7937778) <sup>33</sup>          |                                                                                                                                    |                                                                                                                                          |
|                                                | Cell culture model system                                                           | 1                                            | 0 - 2                                                                             |                                                                   |        |        |                                                            |                                                                                                                                    |                                                                                                                                          |
|                                                | Rescue in animal model                                                              | 2                                            | 0 - 4                                                                             |                                                                   |        |        |                                                            |                                                                                                                                    |                                                                                                                                          |
|                                                | Rescue in engineered equivalent                                                     | 1                                            | 0 - 2                                                                             |                                                                   |        |        |                                                            |                                                                                                                                    |                                                                                                                                          |
| Total Experimental Evidence Points (Maximum 6) |                                                                                     |                                              |                                                                                   |                                                                   |        |        | 5.5                                                        |                                                                                                                                    |                                                                                                                                          |

**Figure S14: Summary of evidence supporting a relationship between CD3E and autosomal recessive severe combined immunodeficiency**



| Assertion criteria                      | Genetic Evidence (0-12 points)                                                                 | Experimental Evidence (0-6 points)                                                                                                                                             | Total Points (0-18)                    | Replication Over Time (Y/N)                        |
|-----------------------------------------|------------------------------------------------------------------------------------------------|--------------------------------------------------------------------------------------------------------------------------------------------------------------------------------|----------------------------------------|----------------------------------------------------|
| <b>Description</b>                      | Case-level, family segregation, or case-control data that support the gene-disease association | Gene-level experimental evidence that support the gene-disease association                                                                                                     | Sum of Genetic & Experimental Evidence | > 2 pubs w/ convincing evidence over time (>3 yrs) |
| <b>Assigned Points</b>                  | <b>6</b>                                                                                       | <b>5.5</b>                                                                                                                                                                     | <b>11.5</b>                            | <b>YES</b>                                         |
| <b>CALCULATED CLASSIFICATION</b>        |                                                                                                | <b>LIMITED</b>                                                                                                                                                                 | <b>1-6</b>                             |                                                    |
|                                         |                                                                                                | <b>MODERATE</b>                                                                                                                                                                | <b>7-11</b>                            |                                                    |
|                                         |                                                                                                | <b>STRONG</b>                                                                                                                                                                  | <b>12-18</b>                           |                                                    |
|                                         |                                                                                                | <b>DEFINITIVE</b>                                                                                                                                                              | <b>12-18 AND replication over time</b> |                                                    |
| Valid contradictory evidence (Y/N)*     | NO                                                                                             |                                                                                                                                                                                |                                        |                                                    |
| <b>CALCULATED CLASSIFICATION (DATE)</b> |                                                                                                | <b>DEFINITIVE</b><br>05/26/2016                                                                                                                                                |                                        |                                                    |
| <b>EXPERT CURATION (DATE)</b>           |                                                                                                | <b>DEFINITIVE</b><br>01/09/2017<br>Expert agrees with decision to round up to "Definitive," and is aware of additional unpublished genetic evidence to corroborate this claim. |                                        |                                                    |

**Figure S15: Summary matrix and classification for *CD3E* and autosomal recessive severe combined immunodeficiency.**

**CHD1L and autosomal dominant renal or urinary tract malformation (CAKUT)**

| Evidence Type                                  |                         | Case Information Type                                                                                  |                                                                                     | Guidelines                                                        |       |        | Scores |                                                         | PMIDs/Notes |
|------------------------------------------------|-------------------------|--------------------------------------------------------------------------------------------------------|-------------------------------------------------------------------------------------|-------------------------------------------------------------------|-------|--------|--------|---------------------------------------------------------|-------------|
|                                                |                         |                                                                                                        |                                                                                     | Default                                                           | Range | Max    | Points | Tally                                                   |             |
| Genetic Evidence                               | Case-Level Data         | Variant Evidence                                                                                       | Autosomal Dominant or X-linked Disorder                                             | Variant is de novo                                                | 2     | 0-3    | 12     |                                                         |             |
|                                                |                         |                                                                                                        |                                                                                     | Proband with predicted or proven null variant                     | 1.5   | 0-2    | 10     |                                                         |             |
|                                                |                         |                                                                                                        |                                                                                     | Proband with other variant type with some evidence of gene impact | 0.5   | 0-1.5  | 7      | 2.5                                                     | 2.5         |
|                                                |                         | Autosomal Recessive Disease                                                                            | Two variants in trans and at least one de novo or a predicted/proven null variant   | 2                                                                 | 0-3   | 12     |        |                                                         |             |
|                                                |                         |                                                                                                        | Two variants (not predicted/proven null) with some evidence of gene impact in trans | 1                                                                 | 0-1.5 |        |        |                                                         |             |
|                                                | Segregation Evidence    | Evidence of segregation in one or more families                                                        | LOD Score Examples                                                                  | 3                                                                 | 5     | 0-7    | 7      |                                                         |             |
|                                                |                         |                                                                                                        |                                                                                     | 2                                                                 | 4     |        |        |                                                         |             |
|                                                |                         |                                                                                                        |                                                                                     | 1.5                                                               | 3     |        |        |                                                         |             |
|                                                |                         |                                                                                                        |                                                                                     | 1                                                                 | 1.5   |        |        |                                                         |             |
|                                                |                         |                                                                                                        |                                                                                     |                                                                   |       |        |        |                                                         |             |
| Case-Control Data                              | Case-Control Study Type | Case-Control Quality Criteria                                                                          |                                                                                     | Guidelines                                                        |       | Scores |        | PMIDs/Notes                                             |             |
|                                                |                         |                                                                                                        |                                                                                     | Points/Study                                                      | Max   | Points | Tally  |                                                         |             |
|                                                | Single Variant Analysis | 1. Variant Detection Methodology<br>2. Power<br>3. Bias and confounding<br>4. Statistical Significance |                                                                                     | 0-6                                                               | 12    |        |        |                                                         |             |
|                                                |                         |                                                                                                        |                                                                                     | 0-6                                                               | 12    |        |        |                                                         |             |
| Total Genetic Evidence Points (Maximum 12)     |                         |                                                                                                        |                                                                                     |                                                                   |       |        |        | 3.5                                                     |             |
| Experimental Evidence                          | Evidence Category       | Evidence Type                                                                                          | Guidelines                                                                          |                                                                   |       | Scores |        | PMIDs/Notes                                             |             |
|                                                |                         |                                                                                                        | Default                                                                             | Range                                                             | Max   | Points | Tally  |                                                         |             |
|                                                | Function                | Biochemical Function                                                                                   | 0.5                                                                                 | 0 - 2                                                             | 2     | 1.0    | 1      | Brockschmidt A et al. 2012 Jun (22146311) <sup>35</sup> |             |
|                                                |                         | Protein Interaction                                                                                    | 0.5                                                                                 | 0 - 2                                                             |       |        |        |                                                         |             |
|                                                |                         | Expression                                                                                             | 0.5                                                                                 | 0 - 2                                                             |       |        |        |                                                         |             |
|                                                | Functional Alteration   | Cells from affected individual                                                                         | 1                                                                                   | 0 - 2                                                             | 2     |        |        |                                                         |             |
|                                                |                         | Engineered cells                                                                                       | 0.5                                                                                 | 0 - 1                                                             |       |        |        |                                                         |             |
|                                                | Models & Rescue         | Animal model                                                                                           | 2                                                                                   | 0 - 4                                                             | 4     |        |        |                                                         |             |
|                                                |                         | Cell culture model system                                                                              | 1                                                                                   | 0 - 2                                                             |       |        |        |                                                         |             |
|                                                |                         | Rescue in animal model                                                                                 | 2                                                                                   | 0 - 4                                                             |       |        |        |                                                         |             |
| Rescue in engineered equivalent                |                         | 1                                                                                                      | 0 - 2                                                                               |                                                                   |       |        |        |                                                         |             |
| Total Experimental Evidence Points (Maximum 6) |                         |                                                                                                        |                                                                                     |                                                                   |       |        |        | 1                                                       |             |

**Figure S16: Summary of evidence supporting a relationship between CHD1L and autosomal dominant renal or urinary tract malformation (CAKUT).**

| Assertion criteria                      | Genetic Evidence (0-12 points)                                                                 | Experimental Evidence (0-6 points)                                         | Total Points (0-18)                    | Replication Over Time (Y/N)                        |
|-----------------------------------------|------------------------------------------------------------------------------------------------|----------------------------------------------------------------------------|----------------------------------------|----------------------------------------------------|
| <b>Description</b>                      | Case-level, family segregation, or case-control data that support the gene-disease association | Gene-level experimental evidence that support the gene-disease association | Sum of Genetic & Experimental Evidence | > 2 pubs w/ convincing evidence over time (>3 yrs) |
| <b>Assigned Points</b>                  | <b>2.5</b>                                                                                     | <b>1</b>                                                                   | <b>3.5</b>                             | <b>NO</b>                                          |
| <b>CALCULATED CLASSIFICATION</b>        |                                                                                                | <b>LIMITED</b>                                                             | <b>1-6</b>                             |                                                    |
|                                         |                                                                                                | <b>MODERATE</b>                                                            | <b>7-11</b>                            |                                                    |
|                                         |                                                                                                | <b>STRONG</b>                                                              | <b>12-18</b>                           |                                                    |
|                                         |                                                                                                | <b>DEFINITIVE</b>                                                          | <b>12-18 AND replication over time</b> |                                                    |
| Valid contradictory evidence (Y/N)*     | NO                                                                                             |                                                                            |                                        |                                                    |
| <b>CALCULATED CLASSIFICATION (DATE)</b> |                                                                                                | <b>LIMITED</b><br>05/25/2016                                               |                                        |                                                    |
| <b>EXPERT CURATION (DATE)</b>           |                                                                                                | <b>LIMITED</b><br>11/18/2016                                               |                                        |                                                    |

**Figure S17: Summary matrix and classification for *CHD1L* and autosomal dominant renal or urinary tract malformation (CAKUT).**

**COL2A1 and autosomal dominant Spondyloepiphyseal dysplasia (Stanescu type)**

| Genetic Evidence                               | Evidence Type                                          | Case Information Type                                                               | Guidelines                                                        |       |        | Scores |                                                                                                    | PMIDs/Notes                                                                                                                            |   |                                                                                                |
|------------------------------------------------|--------------------------------------------------------|-------------------------------------------------------------------------------------|-------------------------------------------------------------------|-------|--------|--------|----------------------------------------------------------------------------------------------------|----------------------------------------------------------------------------------------------------------------------------------------|---|------------------------------------------------------------------------------------------------|
|                                                |                                                        |                                                                                     | Default                                                           | Range | Max    | Points | Tally                                                                                              |                                                                                                                                        |   |                                                                                                |
|                                                |                                                        |                                                                                     |                                                                   |       |        |        |                                                                                                    |                                                                                                                                        |   |                                                                                                |
| Case-Level Data                                | Variant Evidence                                       | Autosomal Dominant or X-linked Disorder                                             | Variant is de novo                                                |       | 2      | 0-3    | 12                                                                                                 | 2.0                                                                                                                                    | 2 | Jurgens J et al. 2015 Oct (26183434) <sup>36</sup>                                             |
|                                                |                                                        |                                                                                     | Proband with predicted or proven null variant                     |       | 1.5    | 0-2    | 10                                                                                                 |                                                                                                                                        |   |                                                                                                |
|                                                |                                                        |                                                                                     | Proband with other variant type with some evidence of gene impact |       | 0.5    | 0-1.5  | 7                                                                                                  | 1.0                                                                                                                                    | 1 | Jurgens J et al. 2015 Oct (26183434); Hammarsjö A et al. 2016 Jan (26420734) <sup>36; 37</sup> |
|                                                | Autosomal Recessive Disease                            | Two variants in trans and at least one de novo or a predicted/proven null variant   |                                                                   | 2     | 0-3    | 12     |                                                                                                    |                                                                                                                                        |   |                                                                                                |
|                                                |                                                        | Two variants (not predicted/proven null) with some evidence of gene impact in trans |                                                                   | 1     | 0-1.5  |        |                                                                                                    |                                                                                                                                        |   |                                                                                                |
| Segregation Evidence                           | Evidence of segregation in one or more families        | LOD Score Examples                                                                  | 3                                                                 | 5     | 0-7    | 7      |                                                                                                    |                                                                                                                                        |   |                                                                                                |
|                                                |                                                        |                                                                                     | 2                                                                 | 4     |        |        |                                                                                                    |                                                                                                                                        |   |                                                                                                |
|                                                |                                                        |                                                                                     | 1.5                                                               | 3     |        |        |                                                                                                    |                                                                                                                                        |   |                                                                                                |
|                                                |                                                        |                                                                                     | 1                                                                 | 1.5   |        |        |                                                                                                    |                                                                                                                                        |   |                                                                                                |
|                                                |                                                        |                                                                                     |                                                                   |       |        |        |                                                                                                    |                                                                                                                                        |   |                                                                                                |
| Case-Control Data                              | Case-Control Study Type                                | Case-Control Quality Criteria                                                       | Guidelines                                                        |       |        | Scores |                                                                                                    | PMIDs/Notes                                                                                                                            |   |                                                                                                |
|                                                |                                                        |                                                                                     | Points/Study                                                      | Max   | Points | Tally  |                                                                                                    |                                                                                                                                        |   |                                                                                                |
|                                                | Single Variant Analysis                                | 1. Variant Detection Methodology<br>2. Power                                        | 0-6                                                               | 12    |        |        |                                                                                                    |                                                                                                                                        |   |                                                                                                |
| Aggregate Variant Analysis                     | 3. Bias and confounding<br>4. Statistical Significance | 0-6                                                                                 | 12                                                                |       |        |        |                                                                                                    |                                                                                                                                        |   |                                                                                                |
| Total Genetic Evidence Points (Maximum 12)     |                                                        |                                                                                     |                                                                   |       |        |        | 9                                                                                                  |                                                                                                                                        |   |                                                                                                |
| Experimental Evidence                          | Function                                               | Biochemical Function                                                                | 0.5                                                               | 0 - 2 | 2      |        |                                                                                                    |                                                                                                                                        |   |                                                                                                |
|                                                |                                                        | Protein Interaction                                                                 | 0.5                                                               | 0 - 2 |        |        |                                                                                                    |                                                                                                                                        |   |                                                                                                |
|                                                |                                                        | Expression                                                                          | 0.5                                                               | 0 - 2 |        |        |                                                                                                    |                                                                                                                                        |   |                                                                                                |
|                                                | Functional Alteration                                  | Cells from affected individual                                                      | 1                                                                 | 0 - 2 | 2      | 2.0    | 2                                                                                                  | Chan D et al. 1993 Jul 15 (8325895); Vandenberg P et al. 1991 Sep 1 (1881905); Garofalo S et al. 1991 Nov 1 (1946380) <sup>38-40</sup> |   |                                                                                                |
|                                                |                                                        | Engineered cells                                                                    | 0.5                                                               | 0 - 1 |        |        |                                                                                                    |                                                                                                                                        |   |                                                                                                |
| Models & Rescue                                | Animal model                                           | 2                                                                                   | 0 - 4                                                             | 4     | 4.0    | 4      | Vandenberg P et al. 1991 Sep 1 (1881905); Garofalo S et al. 1991 Nov 1 (1946380) <sup>39, 40</sup> |                                                                                                                                        |   |                                                                                                |
|                                                | Cell culture model system                              | 1                                                                                   | 0 - 2                                                             |       |        |        |                                                                                                    |                                                                                                                                        |   |                                                                                                |
|                                                | Rescue in animal model                                 | 2                                                                                   | 0 - 4                                                             |       |        |        |                                                                                                    |                                                                                                                                        |   |                                                                                                |
|                                                | Rescue in engineered equivalent                        | 1                                                                                   | 0 - 2                                                             |       |        |        |                                                                                                    |                                                                                                                                        |   |                                                                                                |
| Total Experimental Evidence Points (Maximum 6) |                                                        |                                                                                     |                                                                   |       |        |        | 6                                                                                                  |                                                                                                                                        |   |                                                                                                |

**Figure S18: Summary of evidence supporting a relationship between COL2A1 and autosomal dominant Spondyloepiphyseal dysplasia (Stanescu type).**

| Assertion criteria                      | Genetic Evidence (0-12 points)                                                                 | Experimental Evidence (0-6 points)                                         | Total Points (0-18)                    | Replication Over Time (Y/N)                        |
|-----------------------------------------|------------------------------------------------------------------------------------------------|----------------------------------------------------------------------------|----------------------------------------|----------------------------------------------------|
| <b>Description</b>                      | Case-level, family segregation, or case-control data that support the gene-disease association | Gene-level experimental evidence that support the gene-disease association | Sum of Genetic & Experimental Evidence | > 2 pubs w/ convincing evidence over time (>3 yrs) |
| <b>Assigned Points</b>                  | <b>3</b>                                                                                       | <b>6</b>                                                                   | <b>9</b>                               | <b>NO</b>                                          |
| <b>CALCULATED CLASSIFICATION</b>        |                                                                                                | <b>LIMITED</b>                                                             | <b>1-6</b>                             |                                                    |
|                                         |                                                                                                | <b>MODERATE</b>                                                            | <b>7-11</b>                            |                                                    |
|                                         |                                                                                                | <b>STRONG</b>                                                              | <b>12-18</b>                           |                                                    |
|                                         |                                                                                                | <b>DEFINITIVE</b>                                                          | <b>12-18 AND replication over time</b> |                                                    |
| Valid contradictory evidence (Y/N)*     | NO                                                                                             |                                                                            |                                        |                                                    |
| <b>CALCULATED CLASSIFICATION (DATE)</b> |                                                                                                | <b>MODERATE</b><br>05/25/2016                                              |                                        |                                                    |
| <b>EXPERT CURATION (DATE)</b>           |                                                                                                | <b>MODERATE</b><br>12/01/2016                                              |                                        |                                                    |

**Figure S19: Summary matrix and classification for *COL2A1* and autosomal dominant Spondyloepiphyseal dysplasia (Stanescu type).**

**DICER1 and autosomal dominant pleuropulmonary blastoma**

| Genetic Evidence                                      | Evidence Type                                   | Case Information Type                                                               | Guidelines                                                        |       |        | Scores |             | PMIDs/Notes                                                                                      |    |                                                                                                                                   |
|-------------------------------------------------------|-------------------------------------------------|-------------------------------------------------------------------------------------|-------------------------------------------------------------------|-------|--------|--------|-------------|--------------------------------------------------------------------------------------------------|----|-----------------------------------------------------------------------------------------------------------------------------------|
|                                                       |                                                 |                                                                                     | Default                                                           | Range | Max    | Points | Tally       |                                                                                                  |    |                                                                                                                                   |
|                                                       |                                                 |                                                                                     |                                                                   |       |        |        |             |                                                                                                  |    |                                                                                                                                   |
| Case-Level Data                                       | Variant Evidence                                | Autosomal Dominant or X-linked Disorder                                             | Variant is de novo                                                |       | 2      | 0-3    | 12          | 12.0                                                                                             | 12 | Hill DA et al. 2009 Aug 21 (19556464); Doros L et al. 2012 Sep (22180160); Stewart DR et al. 2014 Nov (25118636) <sup>41-43</sup> |
|                                                       |                                                 |                                                                                     | Proband with predicted or proven null variant                     |       | 1.5    | 0-2    | 10          |                                                                                                  |    |                                                                                                                                   |
|                                                       |                                                 |                                                                                     | Proband with other variant type with some evidence of gene impact |       | 0.5    | 0-1.5  | 7           |                                                                                                  |    |                                                                                                                                   |
|                                                       | Autosomal Recessive Disease                     | Two variants in trans and at least one de novo or a predicted/proven null variant   |                                                                   | 2     | 0-3    | 12     |             |                                                                                                  |    |                                                                                                                                   |
|                                                       |                                                 | Two variants (not predicted/proven null) with some evidence of gene impact in trans |                                                                   | 1     | 0-1.5  |        |             |                                                                                                  |    |                                                                                                                                   |
| Segregation Evidence                                  | Evidence of segregation in one or more families | LOD Score Examples                                                                  | 3                                                                 | 5     | 0-7    | 7      |             |                                                                                                  |    |                                                                                                                                   |
|                                                       |                                                 |                                                                                     | 2                                                                 | 4     |        |        |             |                                                                                                  |    |                                                                                                                                   |
|                                                       |                                                 |                                                                                     | 1.5                                                               | 3     |        |        |             |                                                                                                  |    |                                                                                                                                   |
|                                                       |                                                 |                                                                                     | 1                                                                 | 1.5   |        |        |             |                                                                                                  |    |                                                                                                                                   |
|                                                       |                                                 |                                                                                     |                                                                   |       |        |        |             |                                                                                                  |    |                                                                                                                                   |
| Case-Control Data                                     | Case-Control Study Type                         | Case-Control Quality Criteria                                                       | Guidelines                                                        |       | Scores |        | PMIDs/Notes |                                                                                                  |    |                                                                                                                                   |
|                                                       |                                                 |                                                                                     | Points/Study                                                      | Max   | Points | Tally  |             |                                                                                                  |    |                                                                                                                                   |
|                                                       | Single Variant Analysis                         | 1. Variant Detection Methodology<br>2. Power                                        | 0-6                                                               | 12    |        |        |             |                                                                                                  |    |                                                                                                                                   |
|                                                       | Aggregate Variant Analysis                      | 3. Bias and confounding<br>4. Statistical Significance                              | 0-6                                                               | 12    |        |        |             |                                                                                                  |    |                                                                                                                                   |
| <b>Total Genetic Evidence Points (Maximum 12)</b>     |                                                 |                                                                                     |                                                                   |       |        |        | <b>12</b>   |                                                                                                  |    |                                                                                                                                   |
| Experimental Evidence                                 | Evidence Category                               | Evidence Type                                                                       | Guidelines                                                        |       |        | Scores |             | PMIDs/Notes                                                                                      |    |                                                                                                                                   |
|                                                       |                                                 |                                                                                     | Default                                                           | Range | Max    | Points | Tally       |                                                                                                  |    |                                                                                                                                   |
|                                                       | Function                                        | Biochemical Function                                                                | 0.5                                                               | 0 - 2 | 2      | 2.0    | 2           | Hill DA et al. 2009 Aug 21 (19556464); Harris KS et al. 2006 Feb 14 (16452165) <sup>41; 44</sup> |    |                                                                                                                                   |
|                                                       |                                                 | Protein Interaction                                                                 | 0.5                                                               | 0 - 2 |        |        |             |                                                                                                  |    |                                                                                                                                   |
|                                                       |                                                 | Expression                                                                          | 0.5                                                               | 0 - 2 |        |        |             |                                                                                                  |    |                                                                                                                                   |
|                                                       | Functional Alteration                           | Cells from affected individual                                                      | 1                                                                 | 0 - 2 | 2      |        |             |                                                                                                  |    |                                                                                                                                   |
|                                                       |                                                 | Engineered cells                                                                    | 0.5                                                               | 0 - 1 |        |        |             |                                                                                                  |    |                                                                                                                                   |
| Models & Rescue                                       | Animal model                                    | 2                                                                                   | 0 - 4                                                             | 4     | 2.0    | 2      |             |                                                                                                  |    |                                                                                                                                   |
|                                                       | Cell culture model system                       | 1                                                                                   | 0 - 2                                                             |       |        |        |             |                                                                                                  |    |                                                                                                                                   |
|                                                       | Rescue in animal model                          | 2                                                                                   | 0 - 4                                                             |       |        |        |             |                                                                                                  |    |                                                                                                                                   |
|                                                       | Rescue in engineered equivalent                 | 1                                                                                   | 0 - 2                                                             |       |        |        |             |                                                                                                  |    |                                                                                                                                   |
| <b>Total Experimental Evidence Points (Maximum 6)</b> |                                                 |                                                                                     |                                                                   |       |        |        | <b>4</b>    |                                                                                                  |    |                                                                                                                                   |

**Figure S20: Summary of evidence supporting a relationship between *DICER1* and autosomal dominant pleuropulmonary blastoma.**

| Assertion criteria                      | Genetic Evidence (0-12 points)                                                                 | Experimental Evidence (0-6 points)                                         | Total Points (0-18)                    | Replication Over Time (Y/N)                        |
|-----------------------------------------|------------------------------------------------------------------------------------------------|----------------------------------------------------------------------------|----------------------------------------|----------------------------------------------------|
| <b>Description</b>                      | Case-level, family segregation, or case-control data that support the gene-disease association | Gene-level experimental evidence that support the gene-disease association | Sum of Genetic & Experimental Evidence | > 2 pubs w/ convincing evidence over time (>3 yrs) |
| <b>Assigned Points</b>                  | <b>12</b>                                                                                      | <b>4</b>                                                                   | <b>16</b>                              | <b>YES</b>                                         |
| <b>CALCULATED CLASSIFICATION</b>        |                                                                                                | <b>LIMITED</b>                                                             | <b>1-6</b>                             |                                                    |
|                                         |                                                                                                | <b>MODERATE</b>                                                            | <b>7-11</b>                            |                                                    |
|                                         |                                                                                                | <b>STRONG</b>                                                              | <b>12-18</b>                           |                                                    |
|                                         |                                                                                                | <b>DEFINITIVE</b>                                                          | <b>12-18 AND replication over time</b> |                                                    |
| Valid contradictory evidence (Y/N)*     | NO                                                                                             |                                                                            |                                        |                                                    |
| <b>CALCULATED CLASSIFICATION (DATE)</b> |                                                                                                | <b>DEFINITIVE</b><br>05/06/2016                                            |                                        |                                                    |
| <b>EXPERT CURATION (DATE)</b>           |                                                                                                | <b>DEFINITIVE</b><br>01/08/2017                                            |                                        |                                                    |

**Figure S21: Summary matrix and classification for *DICER1* and autosomal dominant pleuropulmonary blastoma.**

**FGFR3 and autosomal dominant achondroplasia**

| Evidence Type                                  |                                                                                     | Case Information Type                        |                                                                                   | Guidelines                                                        |       |        | Scores                                                                                     |             | PMIDs/Notes |                                                                     |                                                                                                                                                                        |                                                                                                                        |
|------------------------------------------------|-------------------------------------------------------------------------------------|----------------------------------------------|-----------------------------------------------------------------------------------|-------------------------------------------------------------------|-------|--------|--------------------------------------------------------------------------------------------|-------------|-------------|---------------------------------------------------------------------|------------------------------------------------------------------------------------------------------------------------------------------------------------------------|------------------------------------------------------------------------------------------------------------------------|
|                                                |                                                                                     |                                              |                                                                                   | Default                                                           | Range | Max    | Points                                                                                     | Tally       |             |                                                                     |                                                                                                                                                                        |                                                                                                                        |
| Genetic Evidence                               | Case-Level Data                                                                     | Variant Evidence                             | Autosomal Dominant or X-linked Disorder                                           | Variant is de novo                                                |       | 2      | 0-3                                                                                        | 12          | 10.0        | 10                                                                  | Rousseau F et al. 1994 Sep 15 (8078586); Shiang R et al. 1994 Jul 29 (7913883) <sup>45, 46</sup><br>(Additional cases are available beyond those in these references.) |                                                                                                                        |
|                                                |                                                                                     |                                              |                                                                                   | Proband with predicted or proven null variant                     |       | 1.5    | 0-2                                                                                        | 10          |             |                                                                     |                                                                                                                                                                        |                                                                                                                        |
|                                                |                                                                                     |                                              |                                                                                   | Proband with other variant type with some evidence of gene impact |       | 0.5    | 0-1.5                                                                                      | 7           | 1.0         | 1                                                                   |                                                                                                                                                                        | Rousseau F et al. 1994 Sep 15 (8078586) <sup>45</sup> (Additional cases are available beyond those in this reference.) |
|                                                |                                                                                     | Autosomal Recessive Disease                  | Two variants in trans and at least one de novo or a predicted/proven null variant |                                                                   | 2     | 0-3    | 12                                                                                         |             |             |                                                                     |                                                                                                                                                                        |                                                                                                                        |
|                                                | Two variants (not predicted/proven null) with some evidence of gene impact in trans |                                              | 1                                                                                 | 0-1.5                                                             |       |        |                                                                                            |             |             |                                                                     |                                                                                                                                                                        |                                                                                                                        |
| Segregation Evidence                           | Evidence of segregation in one or more families                                     |                                              | LOD Score Examples                                                                | 3                                                                 | 5     | 0-7    | 7                                                                                          | 2.0         | 2           | Rousseau F et al. 1994 Sep 15 (8078586) <sup>45</sup>               |                                                                                                                                                                        |                                                                                                                        |
|                                                |                                                                                     |                                              | 2                                                                                 | 4                                                                 |       |        |                                                                                            |             |             |                                                                     |                                                                                                                                                                        |                                                                                                                        |
|                                                |                                                                                     |                                              | 1.5                                                                               | 3                                                                 |       |        |                                                                                            |             |             |                                                                     |                                                                                                                                                                        |                                                                                                                        |
|                                                |                                                                                     |                                              | 1                                                                                 | 1.5                                                               |       |        |                                                                                            |             |             |                                                                     |                                                                                                                                                                        |                                                                                                                        |
|                                                |                                                                                     |                                              |                                                                                   |                                                                   |       |        |                                                                                            |             |             |                                                                     |                                                                                                                                                                        |                                                                                                                        |
| Case-Control Data                              | Case-Control Study Type                                                             | Case-Control Quality Criteria                |                                                                                   | Guidelines                                                        |       |        | Scores                                                                                     |             | PMIDs/Notes |                                                                     |                                                                                                                                                                        |                                                                                                                        |
|                                                |                                                                                     |                                              |                                                                                   | Points/Study                                                      | Max   | Points | Tally                                                                                      |             |             |                                                                     |                                                                                                                                                                        |                                                                                                                        |
|                                                | Single Variant Analysis                                                             | 1. Variant Detection Methodology<br>2. Power |                                                                                   | 0-6                                                               | 12    |        |                                                                                            |             |             |                                                                     |                                                                                                                                                                        |                                                                                                                        |
| Aggregate Variant Analysis                     | 3. Bias and confounding<br>4. Statistical Significance                              |                                              | 0-6                                                                               | 12                                                                |       |        |                                                                                            |             |             |                                                                     |                                                                                                                                                                        |                                                                                                                        |
| Total Genetic Evidence Points (Maximum 12)     |                                                                                     |                                              |                                                                                   |                                                                   |       |        |                                                                                            |             | 12          | Additional genetic evidence is available beyond this maximum score. |                                                                                                                                                                        |                                                                                                                        |
| Experimental Evidence                          | Evidence Category                                                                   | Evidence Type                                | Guidelines                                                                        |                                                                   |       | Scores |                                                                                            | PMIDs/Notes |             |                                                                     |                                                                                                                                                                        |                                                                                                                        |
|                                                |                                                                                     |                                              | Default                                                                           | Range                                                             | Max   | Points | Tally                                                                                      |             |             |                                                                     |                                                                                                                                                                        |                                                                                                                        |
|                                                | Function                                                                            | Biochemical Function                         | 0.5                                                                               | 0 - 2                                                             | 2     |        |                                                                                            |             |             |                                                                     |                                                                                                                                                                        |                                                                                                                        |
|                                                |                                                                                     | Protein Interaction                          | 0.5                                                                               | 0 - 2                                                             |       |        |                                                                                            |             |             |                                                                     |                                                                                                                                                                        |                                                                                                                        |
|                                                |                                                                                     | Expression                                   | 0.5                                                                               | 0 - 2                                                             |       |        |                                                                                            |             |             |                                                                     |                                                                                                                                                                        |                                                                                                                        |
| Functional Alteration                          | Cells from affected individual                                                      | 1                                            | 0 - 2                                                                             | 2                                                                 | 1.0   | 1      | Naski MC et al. 1998 Dec (9811582); Cho JY et al. 2004 Jan 13 (14699054) <sup>47, 48</sup> |             |             |                                                                     |                                                                                                                                                                        |                                                                                                                        |
|                                                | Engineered cells                                                                    | 0.5                                          | 0 - 1                                                                             |                                                                   |       |        |                                                                                            |             |             |                                                                     |                                                                                                                                                                        |                                                                                                                        |
| Models & Rescue                                | Animal model                                                                        | 2                                            | 0 - 4                                                                             | 4                                                                 | 2.0   | 2      | Wang Y et al. 1999 Apr 13 (10200283) <sup>49</sup>                                         |             |             |                                                                     |                                                                                                                                                                        |                                                                                                                        |
|                                                | Cell culture model system                                                           | 1                                            | 0 - 2                                                                             |                                                                   |       |        |                                                                                            |             |             |                                                                     |                                                                                                                                                                        |                                                                                                                        |
|                                                | Rescue in animal model                                                              | 2                                            | 0 - 4                                                                             |                                                                   |       |        |                                                                                            |             |             |                                                                     |                                                                                                                                                                        |                                                                                                                        |
|                                                | Rescue in engineered equivalent                                                     | 1                                            | 0 - 2                                                                             |                                                                   |       |        |                                                                                            |             |             |                                                                     |                                                                                                                                                                        |                                                                                                                        |
| Total Experimental Evidence Points (Maximum 6) |                                                                                     |                                              |                                                                                   |                                                                   |       |        |                                                                                            |             | 3           | Additional experimental data may be available.                      |                                                                                                                                                                        |                                                                                                                        |

**Figure S22: Summary of evidence supporting a relationship between *FGFR3* and autosomal dominant achondroplasia.**



| Assertion criteria                      | Genetic Evidence (0-12 points)                                                                 | Experimental Evidence (0-6 points)                                         | Total Points (0-18)                    | Replication Over Time (Y/N)                        |
|-----------------------------------------|------------------------------------------------------------------------------------------------|----------------------------------------------------------------------------|----------------------------------------|----------------------------------------------------|
| <b>Description</b>                      | Case-level, family segregation, or case-control data that support the gene-disease association | Gene-level experimental evidence that support the gene-disease association | Sum of Genetic & Experimental Evidence | > 2 pubs w/ convincing evidence over time (>3 yrs) |
| <b>Assigned Points</b>                  | <b>12</b>                                                                                      | <b>3</b>                                                                   | <b>15</b>                              | <b>YES</b>                                         |
| <b>CALCULATED CLASSIFICATION</b>        |                                                                                                | <b>LIMITED</b>                                                             | <b>1-6</b>                             |                                                    |
|                                         |                                                                                                | <b>MODERATE</b>                                                            | <b>7-11</b>                            |                                                    |
|                                         |                                                                                                | <b>STRONG</b>                                                              | <b>12-18</b>                           |                                                    |
|                                         |                                                                                                | <b>DEFINITIVE</b>                                                          | <b>12-18 AND replication over time</b> |                                                    |
| Valid contradictory evidence (Y/N)*     | NO                                                                                             |                                                                            |                                        |                                                    |
| <b>CALCULATED CLASSIFICATION (DATE)</b> |                                                                                                | <b>DEFINITIVE</b><br>04/05/2016                                            |                                        |                                                    |
| <b>EXPERT CURATION (DATE)</b>           |                                                                                                | <b>DEFINITIVE</b><br>12/01/2016                                            |                                        |                                                    |

**Figure S23: Summary matrix and classification for *FGFR3* and autosomal dominant achondroplasia.**

### HNRNPK and autosomal dominant Au-Kline syndrome

| Evidence Type                                         |                                                 | Case Information Type                                                                                  |                                                                                     | Guidelines                                                        |       |        | Scores |            | PMIDs/Notes                                      |   |                                                                                        |  |
|-------------------------------------------------------|-------------------------------------------------|--------------------------------------------------------------------------------------------------------|-------------------------------------------------------------------------------------|-------------------------------------------------------------------|-------|--------|--------|------------|--------------------------------------------------|---|----------------------------------------------------------------------------------------|--|
|                                                       |                                                 |                                                                                                        |                                                                                     | Default                                                           | Range | Max    | Points | Tally      |                                                  |   |                                                                                        |  |
| Genetic Evidence                                      | Case-Level Data                                 | Variant Evidence                                                                                       | Autosomal Dominant or X-linked Disorder                                             | Variant is de novo                                                |       | 2      | 0-3    | 12         | 6.0                                              | 6 | Au PY et al. 2015 Oct (26173930); Lange L et al. 2016 Sep (26954065) <sup>50; 51</sup> |  |
|                                                       |                                                 |                                                                                                        |                                                                                     | Proband with predicted or proven null variant                     |       | 1.5    | 0-2    | 10         |                                                  |   |                                                                                        |  |
|                                                       |                                                 |                                                                                                        |                                                                                     | Proband with other variant type with some evidence of gene impact |       | 0.5    | 0-1.5  | 7          |                                                  |   |                                                                                        |  |
|                                                       |                                                 | Autosomal Recessive Disease                                                                            | Two variants in trans and at least one de novo or a predicted/proven null variant   |                                                                   | 2     | 0-3    | 12     |            |                                                  |   |                                                                                        |  |
|                                                       |                                                 |                                                                                                        | Two variants (not predicted/proven null) with some evidence of gene impact in trans |                                                                   | 1     | 0-1.5  |        |            |                                                  |   |                                                                                        |  |
| Segregation Evidence                                  | Evidence of segregation in one or more families | LOD Score Examples                                                                                     | 3                                                                                   | 5                                                                 | 0-7   | 7      |        |            |                                                  |   |                                                                                        |  |
|                                                       |                                                 |                                                                                                        | 2                                                                                   | 4                                                                 |       |        |        |            |                                                  |   |                                                                                        |  |
|                                                       |                                                 |                                                                                                        | 1.5                                                                                 | 3                                                                 |       |        |        |            |                                                  |   |                                                                                        |  |
|                                                       |                                                 |                                                                                                        | 1                                                                                   | 1.5                                                               |       |        |        |            |                                                  |   |                                                                                        |  |
|                                                       |                                                 |                                                                                                        |                                                                                     |                                                                   |       |        |        |            |                                                  |   |                                                                                        |  |
| Case-Control Data                                     | Case-Control Study Type                         | Case-Control Quality Criteria                                                                          |                                                                                     | Guidelines                                                        |       |        | Scores |            | PMIDs/Notes                                      |   |                                                                                        |  |
|                                                       |                                                 |                                                                                                        |                                                                                     | Points/Study                                                      | Max   | Points | Tally  |            |                                                  |   |                                                                                        |  |
|                                                       | Single Variant Analysis                         | 1. Variant Detection Methodology<br>2. Power<br>3. Bias and confounding<br>4. Statistical Significance |                                                                                     | 0-6                                                               |       | 12     |        |            |                                                  |   |                                                                                        |  |
|                                                       |                                                 |                                                                                                        |                                                                                     | 0-6                                                               |       | 12     |        |            |                                                  |   |                                                                                        |  |
| <b>Total Genetic Evidence Points (Maximum 12)</b>     |                                                 |                                                                                                        |                                                                                     |                                                                   |       |        |        | <b>6.5</b> |                                                  |   |                                                                                        |  |
| Experimental Evidence                                 | Function                                        | Biochemical Function                                                                                   |                                                                                     | 0.5                                                               | 0 - 2 | 2      | 0.5    | 0.5        | Fan X et al. 2015 Dec 7 (26638989) <sup>52</sup> |   |                                                                                        |  |
|                                                       |                                                 | Protein Interaction                                                                                    |                                                                                     | 0.5                                                               | 0 - 2 |        |        |            |                                                  |   |                                                                                        |  |
|                                                       |                                                 | Expression                                                                                             |                                                                                     | 0.5                                                               | 0 - 2 |        |        |            |                                                  |   |                                                                                        |  |
|                                                       | Functional Alteration                           | Cells from affected individual                                                                         |                                                                                     | 1                                                                 | 0 - 2 | 2      |        |            |                                                  |   |                                                                                        |  |
|                                                       |                                                 | Engineered cells                                                                                       |                                                                                     | 0.5                                                               | 0 - 1 |        |        |            |                                                  |   |                                                                                        |  |
|                                                       | Models & Rescue                                 | Animal model                                                                                           |                                                                                     | 2                                                                 | 0 - 4 | 4      |        |            |                                                  |   |                                                                                        |  |
|                                                       |                                                 | Cell culture model system                                                                              |                                                                                     | 1                                                                 | 0 - 2 |        |        |            |                                                  |   |                                                                                        |  |
| Rescue in animal model                                |                                                 | 2                                                                                                      | 0 - 4                                                                               |                                                                   |       |        |        |            |                                                  |   |                                                                                        |  |
| Rescue in engineered equivalent                       |                                                 | 1                                                                                                      | 0 - 2                                                                               |                                                                   |       |        |        |            |                                                  |   |                                                                                        |  |
| <b>Total Experimental Evidence Points (Maximum 6)</b> |                                                 |                                                                                                        |                                                                                     |                                                                   |       |        |        | <b>0.5</b> |                                                  |   |                                                                                        |  |

**Figure S24: Summary of evidence supporting a relationship between *HNRNPK* and autosomal dominant Au-Kline syndrome.**

| Assertion criteria                      | Genetic Evidence (0-12 points)                                                                 | Experimental Evidence (0-6 points)                                         | Total Points (0-18)                    | Replication Over Time (Y/N)                        |
|-----------------------------------------|------------------------------------------------------------------------------------------------|----------------------------------------------------------------------------|----------------------------------------|----------------------------------------------------|
| <b>Description</b>                      | Case-level, family segregation, or case-control data that support the gene-disease association | Gene-level experimental evidence that support the gene-disease association | Sum of Genetic & Experimental Evidence | > 2 pubs w/ convincing evidence over time (>3 yrs) |
| <b>Assigned Points</b>                  | <b>6</b>                                                                                       | <b>0.5</b>                                                                 | <b>6.5</b>                             | <b>NO</b>                                          |
| <b>CALCULATED CLASSIFICATION</b>        |                                                                                                | <b>LIMITED</b>                                                             | <b>1-6</b>                             |                                                    |
|                                         |                                                                                                | <b>MODERATE</b>                                                            | <b>7-11</b>                            |                                                    |
|                                         |                                                                                                | <b>STRONG</b>                                                              | <b>12-18</b>                           |                                                    |
|                                         |                                                                                                | <b>DEFINITIVE</b>                                                          | <b>12-18 AND replication over time</b> |                                                    |
| Valid contradictory evidence (Y/N)*     | NO                                                                                             |                                                                            |                                        |                                                    |
| <b>CALCULATED CLASSIFICATION (DATE)</b> |                                                                                                | <b>MODERATE</b>                                                            |                                        |                                                    |
| <b>EXPERT CURATION (DATE)</b>           |                                                                                                | <b>MODERATE</b><br>11/15/2016                                              |                                        |                                                    |

**Figure S25: Summary matrix and classification for *HNRNPK* and autosomal dominant Au-Kline**

**syndrome.** Evidence is rapidly emerging supporting the association between *HNRNPK* and Au-Kline syndrome. Gallardo, et al. published a paper in 2015<sup>53</sup> describing an *Hnrnpk* +/- haploinsufficient mouse, which they developed to study its role in tumorigenesis. Personal communication with the senior author of that paper, Sean Post, in August 2016, revealed that the haploinsufficient mice appeared to have "significant reduction in overall size and had numerous structural/bone abnormalities," reminiscent of the human phenotype, though he clarified that his group is not able to formally assess them for these types of phenotypes. Additionally, we are aware of at least one additional unpublished case - this evidence is not being formally considered, as it is not part of the public domain.

**LAMB1 and autosomal recessive lissencephaly 5**

|                                                       | Evidence Type              | Case Information Type                                                                                  | Guidelines                                      |                                                                                     |                                                                   | Scores |          | PMIDs/Notes                                    |     |                                                        |                                                        |
|-------------------------------------------------------|----------------------------|--------------------------------------------------------------------------------------------------------|-------------------------------------------------|-------------------------------------------------------------------------------------|-------------------------------------------------------------------|--------|----------|------------------------------------------------|-----|--------------------------------------------------------|--------------------------------------------------------|
|                                                       |                            |                                                                                                        | Default                                         | Range                                                                               | Max                                                               | Points | Tally    |                                                |     |                                                        |                                                        |
| Genetic Evidence                                      | Case-Level Data            | Variant Evidence                                                                                       | Autosomal Dominant or X-linked Disorder         |                                                                                     | Variant is de novo                                                | 2      | 0-3      | 12                                             |     |                                                        |                                                        |
|                                                       |                            |                                                                                                        | Autosomal Dominant or X-linked Disorder         |                                                                                     | Proband with predicted or proven null variant                     | 1.5    | 0-2      | 10                                             |     |                                                        |                                                        |
|                                                       |                            |                                                                                                        | Autosomal Dominant or X-linked Disorder         |                                                                                     | Proband with other variant type with some evidence of gene impact | 0.5    | 0-1.5    | 7                                              |     |                                                        |                                                        |
|                                                       |                            | Autosomal Recessive Disease                                                                            |                                                 | Two variants in trans and at least one de novo or a predicted/proven null variant   | 2                                                                 | 0-3    |          | 4.0                                            | 4   | Radmanesh F et al. 2013 Mar 7 (23472759) <sup>54</sup> |                                                        |
|                                                       |                            | Autosomal Recessive Disease                                                                            |                                                 | Two variants (not predicted/proven null) with some evidence of gene impact in trans | 1                                                                 | 0-1.5  | 12       |                                                |     |                                                        |                                                        |
|                                                       | Segregation Evidence       |                                                                                                        | Evidence of segregation in one or more families | LOD Score Examples                                                                  | 3                                                                 | 5      | 0-7      | 7                                              | 4.0 | 4                                                      | Radmanesh F et al. 2013 Mar 7 (23472759) <sup>54</sup> |
|                                                       | Segregation Evidence       |                                                                                                        |                                                 |                                                                                     | 2                                                                 | 4      |          |                                                |     |                                                        |                                                        |
|                                                       | Segregation Evidence       |                                                                                                        |                                                 |                                                                                     | 1.5                                                               | 3      |          |                                                |     |                                                        |                                                        |
|                                                       | Segregation Evidence       |                                                                                                        |                                                 |                                                                                     | 1                                                                 | 1.5    |          |                                                |     |                                                        |                                                        |
|                                                       | Segregation Evidence       |                                                                                                        |                                                 |                                                                                     |                                                                   |        |          |                                                |     |                                                        |                                                        |
| Case-Control Data                                     | Case-Control Study Type    | Case-Control Quality Criteria                                                                          | Guidelines                                      |                                                                                     |                                                                   | Scores |          | PMIDs/Notes                                    |     |                                                        |                                                        |
|                                                       |                            |                                                                                                        | Points/Study                                    | Max                                                                                 | Points                                                            | Tally  |          |                                                |     |                                                        |                                                        |
|                                                       | Single Variant Analysis    | 1. Variant Detection Methodology<br>2. Power<br>3. Bias and confounding<br>4. Statistical Significance | 0-6                                             | 12                                                                                  |                                                                   |        |          |                                                |     |                                                        |                                                        |
|                                                       | Aggregate Variant Analysis |                                                                                                        | 0-6                                             | 12                                                                                  |                                                                   |        |          |                                                |     |                                                        |                                                        |
| <b>Total Genetic Evidence Points (Maximum 12)</b>     |                            |                                                                                                        |                                                 |                                                                                     |                                                                   |        | <b>8</b> |                                                |     |                                                        |                                                        |
| Experimental Evidence                                 | Evidence Category          | Evidence Type                                                                                          | Guidelines                                      |                                                                                     |                                                                   | Scores |          | PMIDs/Notes                                    |     |                                                        |                                                        |
|                                                       |                            |                                                                                                        | Default                                         | Range                                                                               | Max                                                               | Points | Tally    |                                                |     |                                                        |                                                        |
|                                                       | Function                   | Biochemical Function                                                                                   | 0.5                                             | 0 - 2                                                                               | 2                                                                 |        |          |                                                |     |                                                        |                                                        |
|                                                       |                            | Protein Interaction                                                                                    | 0.5                                             | 0 - 2                                                                               |                                                                   |        |          |                                                |     |                                                        |                                                        |
|                                                       |                            | Expression                                                                                             | 0.5                                             | 0 - 2                                                                               |                                                                   |        |          |                                                |     |                                                        |                                                        |
|                                                       | Functional Alteration      | Cells from affected individual                                                                         | 1                                               | 0 - 2                                                                               | 2                                                                 |        |          |                                                |     |                                                        |                                                        |
|                                                       |                            | Engineered cells                                                                                       | 0.5                                             | 0 - 1                                                                               |                                                                   |        |          |                                                |     |                                                        |                                                        |
|                                                       | Models & Rescue            | Animal model                                                                                           | 2                                               | 0 - 4                                                                               | 4                                                                 | 1.0    | 1        | Lee J et al. 2007 Jun (17525174) <sup>55</sup> |     |                                                        |                                                        |
|                                                       |                            | Cell culture model system                                                                              | 1                                               | 0 - 2                                                                               |                                                                   |        |          |                                                |     |                                                        |                                                        |
|                                                       |                            | Rescue in animal model                                                                                 | 2                                               | 0 - 4                                                                               |                                                                   |        |          |                                                |     |                                                        |                                                        |
| Rescue in engineered equivalent                       |                            | 1                                                                                                      | 0 - 2                                           |                                                                                     |                                                                   |        |          |                                                |     |                                                        |                                                        |
| <b>Total Experimental Evidence Points (Maximum 6)</b> |                            |                                                                                                        |                                                 |                                                                                     |                                                                   |        | <b>1</b> |                                                |     |                                                        |                                                        |

**Figure S26: Summary of evidence supporting a relationship between LAMB1 and autosomal recessive lissencephaly 5.**

| Assertion criteria                      | Genetic Evidence (0-12 points)                                                                 | Experimental Evidence (0-6 points)                                         | Total Points (0-18)                    | Replication Over Time (Y/N)                        |
|-----------------------------------------|------------------------------------------------------------------------------------------------|----------------------------------------------------------------------------|----------------------------------------|----------------------------------------------------|
| <b>Description</b>                      | Case-level, family segregation, or case-control data that support the gene-disease association | Gene-level experimental evidence that support the gene-disease association | Sum of Genetic & Experimental Evidence | > 2 pubs w/ convincing evidence over time (>3 yrs) |
| <b>Assigned Points</b>                  | <b>8</b>                                                                                       | <b>1</b>                                                                   | <b>9</b>                               | <b>NO</b>                                          |
| <b>CALCULATED CLASSIFICATION</b>        |                                                                                                | <b>LIMITED</b>                                                             | <b>1-6</b>                             |                                                    |
|                                         |                                                                                                | <b>MODERATE</b>                                                            | <b>7-11</b>                            |                                                    |
|                                         |                                                                                                | <b>STRONG</b>                                                              | <b>12-18</b>                           |                                                    |
|                                         |                                                                                                | <b>DEFINITIVE</b>                                                          | <b>12-18 AND replication over time</b> |                                                    |
| Valid contradictory evidence (Y/N)*     | NO                                                                                             |                                                                            |                                        |                                                    |
| <b>CALCULATED CLASSIFICATION (DATE)</b> |                                                                                                | <b>MODERATE</b><br>11/03/2016                                              |                                        |                                                    |
| <b>EXPERT CURATION (DATE)</b>           |                                                                                                | <b>MODERATE</b><br>11/15/2016                                              |                                        |                                                    |

**Figure S27: Summary matrix and classification for *LAMB1* and autosomal recessive lissencephaly 5.**

**LBR and autosomal recessive anadysplasia-like, spontaneously remitting spondylometaphyseal dysplasia**

| Evidence Type                                  |                                                                                     | Case Information Type                                                                                  |                                                                                   | Guidelines                                                        |       |        | Scores                                               |                                                       | PMIDs/Notes                                                                                  |
|------------------------------------------------|-------------------------------------------------------------------------------------|--------------------------------------------------------------------------------------------------------|-----------------------------------------------------------------------------------|-------------------------------------------------------------------|-------|--------|------------------------------------------------------|-------------------------------------------------------|----------------------------------------------------------------------------------------------|
|                                                |                                                                                     |                                                                                                        |                                                                                   | Default                                                           | Range | Max    | Points                                               | Tally                                                 |                                                                                              |
| Genetic Evidence                               | Case-Level Data                                                                     | Variant Evidence                                                                                       | Autosomal Dominant or X-linked Disorder                                           | Variant is de novo                                                | 2     | 0-3    | 12                                                   |                                                       |                                                                                              |
|                                                |                                                                                     |                                                                                                        |                                                                                   | Proband with predicted or proven null variant                     | 1.5   | 0-2    | 10                                                   |                                                       |                                                                                              |
|                                                |                                                                                     |                                                                                                        |                                                                                   | Proband with other variant type with some evidence of gene impact | 0.5   | 0-1.5  | 7                                                    |                                                       |                                                                                              |
|                                                |                                                                                     | Autosomal Recessive Disease                                                                            | Two variants in trans and at least one de novo or a predicted/proven null variant | 2                                                                 | 0-3   | 12     | 4.0                                                  | 4                                                     | Sobreira N et al. 2015 Jan (25348816); Borovik L et al. 2013 Aug (23824842) <sup>56,57</sup> |
|                                                | Two variants (not predicted/proven null) with some evidence of gene impact in trans |                                                                                                        | 1                                                                                 | 0-1.5                                                             |       |        |                                                      |                                                       |                                                                                              |
| Segregation Evidence                           | Evidence of segregation in one or more families                                     | LOD Score Examples                                                                                     | 3                                                                                 | 5                                                                 | 0-7   | 7      |                                                      |                                                       |                                                                                              |
|                                                |                                                                                     |                                                                                                        | 2                                                                                 | 4                                                                 |       |        |                                                      |                                                       |                                                                                              |
|                                                |                                                                                     |                                                                                                        | 1.5                                                                               | 3                                                                 |       |        |                                                      |                                                       |                                                                                              |
|                                                |                                                                                     |                                                                                                        | 1                                                                                 | 1.5                                                               |       |        |                                                      |                                                       |                                                                                              |
|                                                |                                                                                     |                                                                                                        |                                                                                   |                                                                   |       |        |                                                      |                                                       |                                                                                              |
| Case-Control Data                              | Case-Control Study Type                                                             | Case-Control Quality Criteria                                                                          |                                                                                   | Guidelines                                                        |       |        | Scores                                               |                                                       | PMIDs/Notes                                                                                  |
|                                                | Single Variant Analysis                                                             | 1. Variant Detection Methodology<br>2. Power<br>3. Bias and confounding<br>4. Statistical Significance | Points/Study                                                                      |                                                                   | Max   | Points | Tally                                                |                                                       |                                                                                              |
|                                                |                                                                                     |                                                                                                        | 0-6                                                                               | 12                                                                |       |        |                                                      |                                                       |                                                                                              |
| Aggregate Variant Analysis                     |                                                                                     | 0-6                                                                                                    | 12                                                                                |                                                                   |       |        |                                                      |                                                       |                                                                                              |
| Total Genetic Evidence Points (Maximum 12)     |                                                                                     |                                                                                                        |                                                                                   |                                                                   |       |        | 4                                                    |                                                       |                                                                                              |
| Experimental Evidence                          | Function                                                                            | Biochemical Function                                                                                   | 0.5                                                                               | 0 - 2                                                             | 2     | 1.0    | 1                                                    | Olins AL et al. 2010 Jan-Feb (21327105) <sup>58</sup> |                                                                                              |
|                                                |                                                                                     |                                                                                                        | 0.5                                                                               | 0 - 2                                                             |       |        |                                                      |                                                       |                                                                                              |
|                                                |                                                                                     |                                                                                                        | 0.5                                                                               | 0 - 2                                                             |       |        |                                                      |                                                       |                                                                                              |
|                                                | Functional Alteration                                                               | Cells from affected individual                                                                         | 1                                                                                 | 0 - 2                                                             | 2     | 0.5    | 0.5                                                  | Zwerger M et al. 2010 Jan 15 (19940018) <sup>59</sup> |                                                                                              |
|                                                |                                                                                     |                                                                                                        | 0.5                                                                               | 0 - 1                                                             |       |        |                                                      |                                                       |                                                                                              |
| Models & Rescue                                | Animal model                                                                        | 2                                                                                                      | 0 - 4                                                                             | 4                                                                 | 1.0   | 1      | Shultz LD et al. 2003 Jan 1 (12490533) <sup>60</sup> |                                                       |                                                                                              |
|                                                |                                                                                     | 1                                                                                                      | 0 - 2                                                                             |                                                                   |       |        |                                                      |                                                       |                                                                                              |
|                                                |                                                                                     | 2                                                                                                      | 0 - 4                                                                             |                                                                   |       |        |                                                      |                                                       |                                                                                              |
|                                                |                                                                                     | 1                                                                                                      | 0 - 2                                                                             |                                                                   |       |        |                                                      |                                                       |                                                                                              |
| Total Experimental Evidence Points (Maximum 6) |                                                                                     |                                                                                                        |                                                                                   |                                                                   |       |        | 2.5                                                  |                                                       |                                                                                              |

**Figure S28: Summary of evidence supporting a relationship between LBR and autosomal recessive anadysplasia-like, spontaneously remitting spondylometaphyseal dysplasia.**

| Assertion criteria                      | Genetic Evidence (0-12 points)                                                                 | Experimental Evidence (0-6 points)                                         | Total Points (0-18)                    | Replication Over Time (Y/N)                        |
|-----------------------------------------|------------------------------------------------------------------------------------------------|----------------------------------------------------------------------------|----------------------------------------|----------------------------------------------------|
| <b>Description</b>                      | Case-level, family segregation, or case-control data that support the gene-disease association | Gene-level experimental evidence that support the gene-disease association | Sum of Genetic & Experimental Evidence | > 2 pubs w/ convincing evidence over time (>3 yrs) |
| <b>Assigned Points</b>                  | <b>4</b>                                                                                       | <b>2.5</b>                                                                 | <b>6.5</b>                             | <b>NO</b>                                          |
| <b>CALCULATED CLASSIFICATION</b>        |                                                                                                | <b>LIMITED</b>                                                             | <b>1-6</b>                             |                                                    |
|                                         |                                                                                                | <b>MODERATE</b>                                                            | <b>7-11</b>                            |                                                    |
|                                         |                                                                                                | <b>STRONG</b>                                                              | <b>12-18</b>                           |                                                    |
|                                         |                                                                                                | <b>DEFINITIVE</b>                                                          | <b>12-18 AND replication over time</b> |                                                    |
| Valid contradictory evidence (Y/N)*     | NO                                                                                             |                                                                            |                                        |                                                    |
| <b>CALCULATED CLASSIFICATION (DATE)</b> |                                                                                                | <b>MODERATE</b>                                                            |                                        |                                                    |
| <b>EXPERT CURATION (DATE)</b>           |                                                                                                | <b>MODERATE</b><br>12/01/2016                                              |                                        |                                                    |

**Figure S27: Summary matrix and classification for *LBR* and autosomal recessive anadysplasia-like, spontaneously remitting spondylometaphyseal dysplasia.**

**MYO9A and autosomal recessive arthrogyrosis**

| Evidence Type                                  |                                                                                     | Case Information Type                        |                                                                                   | Guidelines                                                        |       |        | Scores |                                                                                                       | PMIDs/Notes                                       |
|------------------------------------------------|-------------------------------------------------------------------------------------|----------------------------------------------|-----------------------------------------------------------------------------------|-------------------------------------------------------------------|-------|--------|--------|-------------------------------------------------------------------------------------------------------|---------------------------------------------------|
|                                                |                                                                                     |                                              |                                                                                   | Default                                                           | Range | Max    | Points | Tally                                                                                                 |                                                   |
| Genetic Evidence                               | Case-Level Data                                                                     | Variant Evidence                             | Autosomal Dominant or X-linked Disorder                                           | Variant is de novo                                                | 2     | 0-3    | 12     |                                                                                                       |                                                   |
|                                                |                                                                                     |                                              |                                                                                   | Proband with predicted or proven null variant                     | 1.5   | 0-2    | 10     |                                                                                                       |                                                   |
|                                                |                                                                                     |                                              |                                                                                   | Proband with other variant type with some evidence of gene impact | 0.5   | 0-1.5  | 7      |                                                                                                       |                                                   |
|                                                |                                                                                     | Autosomal Recessive Disease                  | Two variants in trans and at least one de novo or a predicted/proven null variant | 2                                                                 | 0-3   | 12     | 2.0    | 2                                                                                                     | Bayram Y et al. 2016 Feb (26752647) <sup>61</sup> |
|                                                | Two variants (not predicted/proven null) with some evidence of gene impact in trans |                                              | 1                                                                                 | 0-1.5                                                             |       |        |        |                                                                                                       |                                                   |
| Segregation Evidence                           | Evidence of segregation in one or more families                                     | LOD Score Examples                           | 3                                                                                 | 5                                                                 | 0-7   | 7      |        |                                                                                                       |                                                   |
|                                                |                                                                                     |                                              | 2                                                                                 | 4                                                                 |       |        |        |                                                                                                       |                                                   |
|                                                |                                                                                     |                                              | 1.5                                                                               | 3                                                                 |       |        |        |                                                                                                       |                                                   |
|                                                |                                                                                     |                                              | 1                                                                                 | 1.5                                                               |       |        |        |                                                                                                       |                                                   |
|                                                |                                                                                     |                                              |                                                                                   |                                                                   |       |        |        |                                                                                                       |                                                   |
| Case-Control Data                              | Case-Control Study Type                                                             | Case-Control Quality Criteria                |                                                                                   | Guidelines                                                        |       | Scores |        | PMIDs/Notes                                                                                           |                                                   |
|                                                |                                                                                     |                                              |                                                                                   | Points/Study                                                      | Max   | Points | Tally  |                                                                                                       |                                                   |
|                                                | Single Variant Analysis                                                             | 1. Variant Detection Methodology<br>2. Power |                                                                                   | 0-6                                                               | 12    |        |        |                                                                                                       |                                                   |
| Aggregate Variant Analysis                     | 3. Bias and confounding<br>4. Statistical Significance                              |                                              | 0-6                                                                               | 12                                                                |       |        |        |                                                                                                       |                                                   |
| Total Genetic Evidence Points (Maximum 12)     |                                                                                     |                                              |                                                                                   |                                                                   |       |        | 2      |                                                                                                       |                                                   |
| Experimental Evidence                          | Function                                                                            | Biochemical Function                         | 0.5                                                                               | 0 - 2                                                             | 2     | 1.0    | 1      | Chieragatti E et al. 1998 Dec 18 (9819351); Gorman SW et al. 1999 Jul 15 (10409426) <sup>62; 63</sup> |                                                   |
|                                                |                                                                                     |                                              | 0.5                                                                               | 0 - 2                                                             |       |        |        |                                                                                                       |                                                   |
|                                                |                                                                                     |                                              | 0.5                                                                               | 0 - 2                                                             |       |        |        |                                                                                                       |                                                   |
|                                                | Functional Alteration                                                               | Cells from affected individual               | 1                                                                                 | 0 - 2                                                             | 2     | 0.5    | 0.5    | Omelchenko T et al. 2012 Feb 21 (22305756) <sup>64</sup>                                              |                                                   |
|                                                |                                                                                     |                                              | 0.5                                                                               | 0 - 1                                                             |       |        |        |                                                                                                       |                                                   |
| Models & Rescue                                | Animal model                                                                        | 2                                            | 0 - 4                                                                             | 4                                                                 |       |        |        |                                                                                                       |                                                   |
|                                                |                                                                                     | Cell culture model system                    | 1                                                                                 |                                                                   | 0 - 2 |        |        |                                                                                                       |                                                   |
|                                                |                                                                                     | Rescue in animal model                       | 2                                                                                 |                                                                   | 0 - 4 |        |        |                                                                                                       |                                                   |
|                                                |                                                                                     | Rescue in engineered equivalent              | 1                                                                                 |                                                                   | 0 - 2 |        |        |                                                                                                       |                                                   |
| Total Experimental Evidence Points (Maximum 6) |                                                                                     |                                              |                                                                                   |                                                                   |       |        | 1.5    |                                                                                                       |                                                   |

**Figure S30: Summary of evidence supporting a relationship between MYO9A and autosomal recessive arthrogyrosis.**



| Assertion criteria                         | Genetic Evidence (0-12 points)                                                                 | Experimental Evidence (0-6 points)                                                                                        | Total Points (0-18)                    | Replication Over Time (Y/N)                        |
|--------------------------------------------|------------------------------------------------------------------------------------------------|---------------------------------------------------------------------------------------------------------------------------|----------------------------------------|----------------------------------------------------|
| <b>Description</b>                         | Case-level, family segregation, or case-control data that support the gene-disease association | Gene-level experimental evidence that support the gene-disease association                                                | Sum of Genetic & Experimental Evidence | > 2 pubs w/ convincing evidence over time (>3 yrs) |
| <b>Assigned Points</b>                     | <b>2</b>                                                                                       | <b>1.5</b>                                                                                                                | <b>3.5</b>                             | <b>NO</b>                                          |
| <b>CALCULATED CLASSIFICATION</b>           |                                                                                                | <b>LIMITED</b>                                                                                                            | <b>1-6</b>                             |                                                    |
|                                            |                                                                                                | <b>MODERATE</b>                                                                                                           | <b>7-11</b>                            |                                                    |
|                                            |                                                                                                | <b>STRONG</b>                                                                                                             | <b>12-18</b>                           |                                                    |
|                                            |                                                                                                | <b>DEFINITIVE</b>                                                                                                         | <b>12-18 AND replication over time</b> |                                                    |
| <b>Valid contradictory evidence (Y/N)*</b> | NO                                                                                             |                                                                                                                           |                                        |                                                    |
| <b>CALCULATED CLASSIFICATION (DATE)</b>    |                                                                                                | <b>LIMITED</b><br>09/08/2016                                                                                              |                                        |                                                    |
| <b>EXPERT CURATION (DATE)</b>              |                                                                                                | <b>LIMITED</b><br>11/24/2016<br>The expert scored this at 3 points, which corresponded to a solid Limited classification. |                                        |                                                    |

**Figure S31: Summary matrix and classification for *MYO9A* and autosomal recessive arthrogyposis.**

**NGLY1 and autosomal recessive congenital disorder of deglycosylation**

| Genetic Evidence                               | Evidence Type                                          | Case Information Type                                                               | Guidelines                                                        |       |       | Scores |       | PMIDs/Notes                                                                                                                                                                                               |
|------------------------------------------------|--------------------------------------------------------|-------------------------------------------------------------------------------------|-------------------------------------------------------------------|-------|-------|--------|-------|-----------------------------------------------------------------------------------------------------------------------------------------------------------------------------------------------------------|
|                                                |                                                        |                                                                                     | Default                                                           | Range | Max   | Points | Tally |                                                                                                                                                                                                           |
|                                                |                                                        |                                                                                     |                                                                   |       |       |        |       |                                                                                                                                                                                                           |
| Case-Level Data                                | Variant Evidence                                       | Autosomal Dominant or X-linked Disorder                                             | Variant is de novo                                                |       | 2     | 0-3    | 12    |                                                                                                                                                                                                           |
|                                                |                                                        |                                                                                     | Proband with predicted or proven null variant                     |       | 1.5   | 0-2    | 10    |                                                                                                                                                                                                           |
|                                                |                                                        |                                                                                     | Proband with other variant type with some evidence of gene impact |       | 0.5   | 0-1.5  | 7     |                                                                                                                                                                                                           |
|                                                | Autosomal Recessive Disease                            | Two variants in trans and at least one de novo or a predicted/proven null variant   |                                                                   | 2     | 0-3   | 12     | 10.0  | Need AC et al. 2012 Jun (22581936); Caglayan AO et al. 2015 Jan (25220016); Enns GM et al. 2014 Oct (24651605); Bosch DG et al. 2016 May (26350515); Heeley J et al. 2015 Apr (25707956) <sup>65-69</sup> |
|                                                |                                                        | Two variants (not predicted/proven null) with some evidence of gene impact in trans |                                                                   | 1     | 0-1.5 |        |       |                                                                                                                                                                                                           |
| Segregation Evidence                           | Evidence of segregation in one or more families        | LOD Score Examples                                                                  | 3                                                                 | 5     | 0-7   | 7      |       |                                                                                                                                                                                                           |
|                                                |                                                        |                                                                                     | 2                                                                 | 4     |       |        |       |                                                                                                                                                                                                           |
|                                                |                                                        |                                                                                     | 1.5                                                               | 3     |       |        |       |                                                                                                                                                                                                           |
|                                                |                                                        |                                                                                     | 1                                                                 | 1.5   |       |        |       |                                                                                                                                                                                                           |
|                                                |                                                        |                                                                                     |                                                                   |       |       |        |       |                                                                                                                                                                                                           |
| Case-Control Data                              | Case-Control Study Type                                | Case-Control Quality Criteria                                                       | Guidelines                                                        |       |       | Scores |       | PMIDs/Notes                                                                                                                                                                                               |
|                                                |                                                        |                                                                                     | Points/Study                                                      |       | Max   | Points | Tally |                                                                                                                                                                                                           |
|                                                | Single Variant Analysis                                | 1. Variant Detection Methodology<br>2. Power                                        | 0-6                                                               |       | 12    |        |       |                                                                                                                                                                                                           |
| Aggregate Variant Analysis                     | 3. Bias and confounding<br>4. Statistical Significance | 0-6                                                                                 |                                                                   | 12    |       |        |       |                                                                                                                                                                                                           |
| Total Genetic Evidence Points (Maximum 12)     |                                                        |                                                                                     |                                                                   |       |       |        | 2     |                                                                                                                                                                                                           |
| Experimental Evidence                          | Function                                               | Biochemical Function                                                                | 0.5                                                               | 0 - 2 | 2     | 1.0    | 1     | Need AC et al. 2012 Jun (22581936); He P et al. 2015 Aug (25900930) <sup>65; 70</sup>                                                                                                                     |
|                                                |                                                        |                                                                                     | 0.5                                                               | 0 - 2 |       |        |       |                                                                                                                                                                                                           |
|                                                |                                                        |                                                                                     | 0.5                                                               | 0 - 2 |       |        |       |                                                                                                                                                                                                           |
|                                                | Functional Alteration                                  | Cells from affected individual                                                      | 1                                                                 | 0 - 2 | 2     | 2.0    | 2     | Need AC et al. 2012 Jun (22581936); Enns GM et al. 2014 Oct (24651605); Heeley J et al. 2015 Apr (25707956) <sup>65; 67; 69</sup>                                                                         |
|                                                |                                                        |                                                                                     | 0.5                                                               | 0 - 1 |       |        |       |                                                                                                                                                                                                           |
|                                                | Models & Rescue                                        | Animal model                                                                        | 2                                                                 | 0 - 4 | 4     | 4.0    | 4     | Huang C et al. 2015 Feb 3 (25605922) <sup>71</sup>                                                                                                                                                        |
|                                                |                                                        |                                                                                     | 1                                                                 | 0 - 2 |       |        |       |                                                                                                                                                                                                           |
| 2                                              |                                                        |                                                                                     | 0 - 4                                                             |       |       |        |       |                                                                                                                                                                                                           |
|                                                | Rescue in engineered equivalent                        | 1                                                                                   | 0 - 2                                                             |       |       |        |       |                                                                                                                                                                                                           |
| Total Experimental Evidence Points (Maximum 6) |                                                        |                                                                                     |                                                                   |       |       |        | 6     |                                                                                                                                                                                                           |

**Figure S32: Summary of evidence supporting a relationship between NGLY1 and autosomal recessive congenital disorder of deglycosylation.**

| Assertion criteria                      | Genetic Evidence (0-12 points)                                                                 | Experimental Evidence (0-6 points)                                         | Total Points (0-18)                    | Replication Over Time (Y/N)                        |
|-----------------------------------------|------------------------------------------------------------------------------------------------|----------------------------------------------------------------------------|----------------------------------------|----------------------------------------------------|
| <b>Description</b>                      | Case-level, family segregation, or case-control data that support the gene-disease association | Gene-level experimental evidence that support the gene-disease association | Sum of Genetic & Experimental Evidence | > 2 pubs w/ convincing evidence over time (>3 yrs) |
| <b>Assigned Points</b>                  | <b>10</b>                                                                                      | <b>6</b>                                                                   | <b>16</b>                              | <b>YES</b>                                         |
| <b>CALCULATED CLASSIFICATION</b>        |                                                                                                | <b>LIMITED</b>                                                             | <b>1-6</b>                             |                                                    |
|                                         |                                                                                                | <b>MODERATE</b>                                                            | <b>7-11</b>                            |                                                    |
|                                         |                                                                                                | <b>STRONG</b>                                                              | <b>12-18</b>                           |                                                    |
|                                         |                                                                                                | <b>DEFINITIVE</b>                                                          | <b>12-18 AND replication over time</b> |                                                    |
| Valid contradictory evidence (Y/N)*     | NO                                                                                             |                                                                            |                                        |                                                    |
| <b>CALCULATED CLASSIFICATION (DATE)</b> |                                                                                                | <b>DEFINITIVE</b><br>06/02/2016                                            |                                        |                                                    |
| <b>EXPERT CURATION (DATE)</b>           |                                                                                                | <b>DEFINITIVE</b><br>12/01/2016                                            |                                        |                                                    |

**Figure S33: Summary matrix and classification for *NGLY1* and autosomal recessive congenital disorder of deglycosylation.**

| NHP2 and autosomal recessive dyskeratosis congenital |                                                        |                                                                                     |                    |       |                  |        |                             |                                                                                                                                         |                                                                                                                                                                                            |
|------------------------------------------------------|--------------------------------------------------------|-------------------------------------------------------------------------------------|--------------------|-------|------------------|--------|-----------------------------|-----------------------------------------------------------------------------------------------------------------------------------------|--------------------------------------------------------------------------------------------------------------------------------------------------------------------------------------------|
| Genetic Evidence                                     | Evidence Type                                          | Case Information Type                                                               | Guidelines         |       |                  | Scores |                             | PMIDs/Notes                                                                                                                             |                                                                                                                                                                                            |
|                                                      |                                                        |                                                                                     | Default            | Range | Max              | Points | Tally                       |                                                                                                                                         |                                                                                                                                                                                            |
|                                                      |                                                        |                                                                                     | Case-Level Data    |       | Variant Evidence |        | Autosomal Recessive Disease |                                                                                                                                         |                                                                                                                                                                                            |
| Genetic Evidence                                     | Autosomal Dominant or X-linked Disorder                | Variant is de novo                                                                  |                    | 2     | 0-3              | 12     |                             |                                                                                                                                         |                                                                                                                                                                                            |
|                                                      |                                                        | Proband with predicted or proven null variant                                       |                    | 1.5   | 0-2              | 10     |                             |                                                                                                                                         |                                                                                                                                                                                            |
|                                                      |                                                        | Proband with other variant type with some evidence of gene impact                   |                    | 0.5   | 0-1.5            | 7      |                             |                                                                                                                                         |                                                                                                                                                                                            |
|                                                      | Autosomal Recessive Disease                            | Two variants in trans and at least one de novo or a predicted/proven null variant   |                    | 2     | 0-3              | 12     | 1.0                         | 2                                                                                                                                       | Vulliamy T et al. 2008 Jun 10 (18523010) <sup>72</sup> (Variant points were downgraded because later papers suggest that the null variant may still result in functional protein product.) |
|                                                      |                                                        | Two variants (not predicted/proven null) with some evidence of gene impact in trans |                    | 1     | 0-1.5            |        | 1.0                         |                                                                                                                                         |                                                                                                                                                                                            |
| Genetic Evidence                                     | Segregation Evidence                                   | Evidence of segregation in one or more families                                     | LOD Score Examples | 3     | 5                | 7      |                             |                                                                                                                                         |                                                                                                                                                                                            |
|                                                      |                                                        |                                                                                     |                    | 2     | 4                |        |                             |                                                                                                                                         |                                                                                                                                                                                            |
|                                                      |                                                        |                                                                                     |                    | 1.5   | 3                |        | 0-7                         |                                                                                                                                         |                                                                                                                                                                                            |
|                                                      |                                                        |                                                                                     |                    | 1     | 1.5              |        |                             |                                                                                                                                         |                                                                                                                                                                                            |
|                                                      |                                                        |                                                                                     |                    |       |                  |        |                             |                                                                                                                                         |                                                                                                                                                                                            |
| Genetic Evidence                                     | Case-Control Study Type                                | Case-Control Quality Criteria                                                       | Guidelines         |       |                  | Scores |                             | PMIDs/Notes                                                                                                                             |                                                                                                                                                                                            |
|                                                      | Single Variant Analysis                                | 1. Variant Detection Methodology<br>2. Power                                        | Points/Study       |       | Max              | Points | Tally                       |                                                                                                                                         |                                                                                                                                                                                            |
|                                                      |                                                        |                                                                                     | 0-6                |       | 12               |        |                             |                                                                                                                                         |                                                                                                                                                                                            |
| Aggregate Variant Analysis                           | 3. Bias and confounding<br>4. Statistical Significance | 0-6                                                                                 |                    | 12    |                  |        |                             |                                                                                                                                         |                                                                                                                                                                                            |
| Total Genetic Evidence Points (Maximum 12)           |                                                        |                                                                                     |                    |       |                  |        | 2                           |                                                                                                                                         |                                                                                                                                                                                            |
| Experimental Evidence                                | Function                                               | Biochemical Function                                                                |                    | 0.5   | 0 - 2            | 2      | 1.5                         | 1.5                                                                                                                                     | Trahan C et al. 2010 Mar 1 (20008900); Freund A et al. 2014 Dec 4 (25467444) <sup>73,74</sup>                                                                                              |
|                                                      |                                                        | Protein Interaction                                                                 |                    | 0.5   | 0 - 2            |        |                             |                                                                                                                                         |                                                                                                                                                                                            |
|                                                      |                                                        | Expression                                                                          |                    | 0.5   | 0 - 2            |        |                             |                                                                                                                                         |                                                                                                                                                                                            |
|                                                      | Functional Alteration                                  | Cells from affected individual                                                      |                    | 1     | 0 - 2            | 2      |                             |                                                                                                                                         |                                                                                                                                                                                            |
|                                                      |                                                        | Engineered cells                                                                    |                    | 0.5   | 0 - 1            |        |                             |                                                                                                                                         |                                                                                                                                                                                            |
| Models & Rescue                                      | Animal model                                           |                                                                                     | 2                  | 0 - 4 | 4                | 2.5    | 2.5                         | Dez C et al. 2001 Feb 1 (11160879); Vulliamy T et al. 2008 Jun 10 (18523010); Vulliamy T et al. 2008 Jun 10 (18523010) <sup>72,75</sup> |                                                                                                                                                                                            |
|                                                      | Cell culture model system                              |                                                                                     | 1                  | 0 - 2 |                  |        |                             |                                                                                                                                         |                                                                                                                                                                                            |
|                                                      | Rescue in animal model                                 |                                                                                     | 2                  | 0 - 4 |                  |        |                             |                                                                                                                                         |                                                                                                                                                                                            |
|                                                      | Rescue in engineered equivalent                        |                                                                                     | 1                  | 0 - 2 |                  |        |                             |                                                                                                                                         |                                                                                                                                                                                            |
| Total Experimental Evidence Points (Maximum 6)       |                                                        |                                                                                     |                    |       |                  |        | 4                           |                                                                                                                                         |                                                                                                                                                                                            |

Figure S34: Summary of evidence supporting a relationship between *NHP2* and autosomal recessive dyskeratosis congenital.

| Assertion criteria                      | Genetic Evidence (0-12 points)                                                                 | Experimental Evidence (0-6 points)                                                                                                                                 | Total Points (0-18)                    | Replication Over Time (Y/N)                        |
|-----------------------------------------|------------------------------------------------------------------------------------------------|--------------------------------------------------------------------------------------------------------------------------------------------------------------------|----------------------------------------|----------------------------------------------------|
| <b>Description</b>                      | Case-level, family segregation, or case-control data that support the gene-disease association | Gene-level experimental evidence that support the gene-disease association                                                                                         | Sum of Genetic & Experimental Evidence | > 2 pubs w/ convincing evidence over time (>3 yrs) |
| <b>Assigned Points</b>                  | <b>2</b>                                                                                       | <b>4</b>                                                                                                                                                           | <b>6</b>                               | <b>NO</b>                                          |
| <b>CALCULATED CLASSIFICATION</b>        |                                                                                                | <b>LIMITED</b>                                                                                                                                                     | <b>1-6</b>                             |                                                    |
|                                         |                                                                                                | <b>MODERATE</b>                                                                                                                                                    | <b>7-11</b>                            |                                                    |
|                                         |                                                                                                | <b>STRONG</b>                                                                                                                                                      | <b>12-18</b>                           |                                                    |
|                                         |                                                                                                | <b>DEFINITIVE</b>                                                                                                                                                  | <b>12-18 AND replication over time</b> |                                                    |
| Valid contradictory evidence (Y/N)*     | NO                                                                                             |                                                                                                                                                                    |                                        |                                                    |
| <b>CALCULATED CLASSIFICATION (DATE)</b> |                                                                                                | <b>LIMITED</b><br>08/04/2016                                                                                                                                       |                                        |                                                    |
| <b>EXPERT CURATION (DATE)</b>           |                                                                                                | <b>LIMITED</b><br>01/25/2017<br>During expert review, the expert added more experimental evidence; however, the clinical validity classification remained limited. |                                        |                                                    |

**Figure S35: Summary matrix and classification for *NHP2* and autosomal recessive dyskeratosis congenital.**

**PALB2 and autosomal dominant hereditary breast cancer**

| Evidence Category                                     | Evidence Type              | Case Information Type                                                                                  | Guidelines                                                                          |       |        | Scores |                                                                                                   | PMIDs/Notes                                                |     |                                                                                                                                                                                                                    |
|-------------------------------------------------------|----------------------------|--------------------------------------------------------------------------------------------------------|-------------------------------------------------------------------------------------|-------|--------|--------|---------------------------------------------------------------------------------------------------|------------------------------------------------------------|-----|--------------------------------------------------------------------------------------------------------------------------------------------------------------------------------------------------------------------|
|                                                       |                            |                                                                                                        | Default                                                                             | Range | Max    | Points | Tally                                                                                             |                                                            |     |                                                                                                                                                                                                                    |
|                                                       |                            |                                                                                                        |                                                                                     |       |        |        |                                                                                                   |                                                            |     |                                                                                                                                                                                                                    |
| Genetic Evidence                                      | Variant Evidence           | Autosomal Dominant or X-linked Disorder                                                                | Variant is de novo                                                                  |       | 2      | 0-3    | 12                                                                                                |                                                            |     |                                                                                                                                                                                                                    |
|                                                       |                            |                                                                                                        | Proband with predicted or proven null variant                                       |       | 1.5    | 0-2    | 10                                                                                                | 7.5                                                        | 7.4 | Erkko H et al. 2007 Mar 15 (17287723); Heikkinen T et al. 2009 May 1 (19383810); Casadei S et al. 2011 Mar 15 (21285249); Hartley T et al. 2014 (25225577); Janatova M et al. 2013 Dec (24136930) <sup>76-80</sup> |
|                                                       |                            |                                                                                                        | Proband with other variant type with some evidence of gene impact                   |       | 0.5    | 0-1.5  | 7                                                                                                 | 0.0                                                        | 0   |                                                                                                                                                                                                                    |
|                                                       |                            | Autosomal Recessive Disease                                                                            | Two variants in trans and at least one de novo or a predicted/proven null variant   |       | 2      | 0-3    | 12                                                                                                |                                                            |     |                                                                                                                                                                                                                    |
|                                                       |                            |                                                                                                        | Two variants (not predicted/proven null) with some evidence of gene impact in trans |       | 1      | 0-1.5  |                                                                                                   |                                                            |     |                                                                                                                                                                                                                    |
|                                                       | Segregation Evidence       | Evidence of segregation in one or more families                                                        | LOD Score Examples                                                                  | 3     | 5      | 0-7    | 7                                                                                                 | 3.0                                                        | 3   | Hartley T et al. 2014 (25225577); Janatova M et al. 2013 Dec (24136930) <sup>79, 80</sup>                                                                                                                          |
|                                                       |                            |                                                                                                        |                                                                                     | 2     | 4      |        |                                                                                                   |                                                            |     |                                                                                                                                                                                                                    |
|                                                       |                            |                                                                                                        |                                                                                     | 1.5   | 3      |        |                                                                                                   |                                                            |     |                                                                                                                                                                                                                    |
|                                                       |                            |                                                                                                        |                                                                                     | 1     | 1.5    |        |                                                                                                   |                                                            |     |                                                                                                                                                                                                                    |
|                                                       |                            |                                                                                                        |                                                                                     |       |        |        |                                                                                                   |                                                            |     |                                                                                                                                                                                                                    |
| Case-Control Data                                     | Case-Control Study Type    | Case-Control Quality Criteria                                                                          | Guidelines                                                                          |       |        | Scores |                                                                                                   | PMIDs/Notes                                                |     |                                                                                                                                                                                                                    |
|                                                       |                            |                                                                                                        | Points/Study                                                                        | Max   | Points | Tally  |                                                                                                   |                                                            |     |                                                                                                                                                                                                                    |
|                                                       | Single Variant Analysis    | 1. Variant Detection Methodology<br>2. Power<br>3. Bias and confounding<br>4. Statistical Significance | 0-6                                                                                 | 12    | 5.0    | 5      | Erkko H et al. 2007 Mar 15 (17287723); Heikkinen T et al. 2009 May 1 (19383810) <sup>76, 77</sup> |                                                            |     |                                                                                                                                                                                                                    |
|                                                       | Aggregate Variant Analysis |                                                                                                        | 0-6                                                                                 | 12    | 4.0    | 4      | Cybulski C et al. 2015 Jun (25959805) <sup>81</sup>                                               |                                                            |     |                                                                                                                                                                                                                    |
| <b>Total Genetic Evidence Points (Maximum 12)</b>     |                            |                                                                                                        |                                                                                     |       |        |        | <b>17</b>                                                                                         |                                                            |     |                                                                                                                                                                                                                    |
| Experimental Evidence                                 | Function                   | Biochemical Function                                                                                   | 0.5                                                                                 | 0 - 2 | 2      | 1.0    | 1                                                                                                 | Xia B et al. 2006 Jun 23 (16793542) <sup>82</sup>          |     |                                                                                                                                                                                                                    |
|                                                       |                            | Protein Interaction                                                                                    | 0.5                                                                                 | 0 - 2 |        |        |                                                                                                   |                                                            |     |                                                                                                                                                                                                                    |
|                                                       |                            | Expression                                                                                             | 0.5                                                                                 | 0 - 2 |        |        |                                                                                                   |                                                            |     |                                                                                                                                                                                                                    |
|                                                       | Functional Alteration      | Cells from affected individual                                                                         | 1                                                                                   | 0 - 2 | 2      | 2.0    | 2                                                                                                 | Erkko H et al. 2007 Mar 15 (17287723) <sup>76</sup>        |     |                                                                                                                                                                                                                    |
|                                                       |                            | Engineered cells                                                                                       | 0.5                                                                                 | 0 - 1 |        |        |                                                                                                   |                                                            |     |                                                                                                                                                                                                                    |
|                                                       | Models & Rescue            | Animal model                                                                                           | 2                                                                                   | 0 - 4 | 4      | 2.0    | 2                                                                                                 | Bowman-Colin C et al. 2013 May 21 (23657012) <sup>83</sup> |     |                                                                                                                                                                                                                    |
|                                                       |                            | Cell culture model system                                                                              | 1                                                                                   | 0 - 2 |        |        |                                                                                                   |                                                            |     |                                                                                                                                                                                                                    |
|                                                       |                            | Rescue in animal model                                                                                 | 2                                                                                   | 0 - 4 |        |        |                                                                                                   |                                                            |     |                                                                                                                                                                                                                    |
| Rescue in engineered equivalent                       |                            | 1                                                                                                      | 0 - 2                                                                               |       |        |        |                                                                                                   |                                                            |     |                                                                                                                                                                                                                    |
| <b>Total Experimental Evidence Points (Maximum 6)</b> |                            |                                                                                                        |                                                                                     |       |        |        | <b>5</b>                                                                                          |                                                            |     |                                                                                                                                                                                                                    |

**Figure S36: Summary of evidence supporting a relationship between *PALB2* and autosomal dominant hereditary breast cancer.**

| Assertion criteria                      | Genetic Evidence (0-12 points)                                                                 | Experimental Evidence (0-6 points)                                         | Total Points (0-18)                    | Replication Over Time (Y/N)                        |
|-----------------------------------------|------------------------------------------------------------------------------------------------|----------------------------------------------------------------------------|----------------------------------------|----------------------------------------------------|
| <b>Description</b>                      | Case-level, family segregation, or case-control data that support the gene-disease association | Gene-level experimental evidence that support the gene-disease association | Sum of Genetic & Experimental Evidence | > 2 pubs w/ convincing evidence over time (>3 yrs) |
| <b>Assigned Points</b>                  | <b>12</b>                                                                                      | <b>5</b>                                                                   | <b>17</b>                              | <b>YES</b>                                         |
| <b>CALCULATED CLASSIFICATION</b>        |                                                                                                | <b>LIMITED</b>                                                             | <b>1-6</b>                             |                                                    |
|                                         |                                                                                                | <b>MODERATE</b>                                                            | <b>7-11</b>                            |                                                    |
|                                         |                                                                                                | <b>STRONG</b>                                                              | <b>12-18</b>                           |                                                    |
|                                         |                                                                                                | <b>DEFINITIVE</b>                                                          | <b>12-18 AND replication over time</b> |                                                    |
| Valid contradictory evidence (Y/N)*     | NO                                                                                             |                                                                            |                                        |                                                    |
| <b>CALCULATED CLASSIFICATION (DATE)</b> |                                                                                                | <b>DEFINITIVE</b><br>06/02/2016                                            |                                        |                                                    |
| <b>EXPERT CURATION (DATE)</b>           |                                                                                                | <b>DEFINITIVE</b><br>12/01/2016                                            |                                        |                                                    |

**Figure S37: Summary matrix and classification for *PALB2* and autosomal dominant hereditary breast cancer.**

| PMS2 and pancreatic cancer                     |                                                 |                                                                                                        |                                                                                     |                                                                   |        |        |             |                                                                                                                                               |   |  |
|------------------------------------------------|-------------------------------------------------|--------------------------------------------------------------------------------------------------------|-------------------------------------------------------------------------------------|-------------------------------------------------------------------|--------|--------|-------------|-----------------------------------------------------------------------------------------------------------------------------------------------|---|--|
| Evidence Type                                  | Case Information Type                           | Guidelines                                                                                             |                                                                                     |                                                                   | Scores |        | PMIDs/Notes |                                                                                                                                               |   |  |
|                                                |                                                 | Default                                                                                                | Range                                                                               | Max                                                               | Points | Tally  |             |                                                                                                                                               |   |  |
| Genetic Evidence                               | Case-Level Data                                 | Variant Evidence                                                                                       | Autosomal Dominant or X-linked Disorder                                             | Variant is de novo                                                | 2      | 0-3    | 12          | 0.0                                                                                                                                           | 0 |  |
|                                                |                                                 |                                                                                                        |                                                                                     | Proband with predicted or proven null variant                     | 1.5    | 0-2    | 10          | 0.0                                                                                                                                           | 0 |  |
|                                                |                                                 |                                                                                                        |                                                                                     | Proband with other variant type with some evidence of gene impact | 0.5    | 0-1.5  | 7           | 0.0                                                                                                                                           | 0 |  |
|                                                |                                                 | Autosomal Recessive Disease                                                                            | Two variants in trans and at least one de novo or a predicted/proven null variant   | 2                                                                 | 0-3    | 12     | 0.0         | 0                                                                                                                                             |   |  |
|                                                |                                                 |                                                                                                        | Two variants (not predicted/proven null) with some evidence of gene impact in trans | 1                                                                 | 0-1.5  |        | 0.0         |                                                                                                                                               |   |  |
| Segregation Evidence                           | Evidence of segregation in one or more families | LOD Score Examples                                                                                     | 3<br>2<br>1.5<br>1                                                                  | 5<br>4<br>3<br>1.5                                                | 0-7    | 7      | 0.0         | 0                                                                                                                                             |   |  |
| Case-Control Data                              | Case-Control Study Type                         | Case-Control Quality Criteria                                                                          | Guidelines                                                                          |                                                                   | Scores |        | PMIDs/Notes |                                                                                                                                               |   |  |
|                                                | Single Variant Analysis                         | 1. Variant Detection Methodology<br>2. Power<br>3. Bias and confounding<br>4. Statistical Significance | Points/Study                                                                        | Max                                                               | Points | Tally  |             |                                                                                                                                               |   |  |
|                                                | Aggregate Variant Analysis                      |                                                                                                        | 0-6                                                                                 | 12                                                                | 0.0    | 0      |             |                                                                                                                                               |   |  |
| Total Genetic Evidence Points (Maximum 12)     |                                                 |                                                                                                        |                                                                                     |                                                                   |        |        | 0           | No reports of variants in this gene associated with this condition.                                                                           |   |  |
| Experimental Evidence                          | Evidence Category                               | Evidence Type                                                                                          | Guidelines                                                                          |                                                                   |        | Scores |             | PMIDs/Notes                                                                                                                                   |   |  |
|                                                |                                                 |                                                                                                        | Default                                                                             | Range                                                             | Max    | Points | Tally       |                                                                                                                                               |   |  |
|                                                | Function                                        | Biochemical Function                                                                                   | 0.5                                                                                 | 0 - 2                                                             | 2      | 0.0    | 0           |                                                                                                                                               |   |  |
|                                                |                                                 | Protein Interaction                                                                                    | 0.5                                                                                 | 0 - 2                                                             |        |        |             |                                                                                                                                               |   |  |
|                                                |                                                 | Expression                                                                                             | 0.5                                                                                 | 0 - 2                                                             |        |        |             |                                                                                                                                               |   |  |
| Functional Alteration                          | Cells from affected individual                  | 1                                                                                                      | 0 - 2                                                                               | 2                                                                 | 0.0    |        |             |                                                                                                                                               |   |  |
|                                                | Engineered cells                                | 0.5                                                                                                    | 0 - 1                                                                               |                                                                   |        |        |             |                                                                                                                                               |   |  |
| Models & Rescue                                | Animal model                                    | 2                                                                                                      | 0 - 4                                                                               | 4                                                                 | 0.0    |        |             |                                                                                                                                               |   |  |
|                                                | Cell culture model system                       | 1                                                                                                      | 0 - 2                                                                               |                                                                   |        |        |             |                                                                                                                                               |   |  |
|                                                | Rescue in animal model                          | 2                                                                                                      | 0 - 4                                                                               |                                                                   |        |        |             |                                                                                                                                               |   |  |
|                                                | Rescue in engineered equivalent                 | 1                                                                                                      | 0 - 2                                                                               |                                                                   |        |        |             |                                                                                                                                               |   |  |
| Total Experimental Evidence Points (Maximum 6) |                                                 |                                                                                                        |                                                                                     |                                                                   |        |        | 0           | Experimental evidence not evaluated. Since no genetic evidence has been reported, the classification is automatically "No Evidence Reported." |   |  |

Figure S38: Summary of evidence supporting a relationship between PMS2 and pancreatic cancer.



| Assertion criteria                      | Genetic Evidence (0-12 points)                                                                 | Experimental Evidence (0-6 points)                                         | Total Points (0-18)                    | Replication Over Time (Y/N)                        |
|-----------------------------------------|------------------------------------------------------------------------------------------------|----------------------------------------------------------------------------|----------------------------------------|----------------------------------------------------|
| <b>Description</b>                      | Case-level, family segregation, or case-control data that support the gene-disease association | Gene-level experimental evidence that support the gene-disease association | Sum of Genetic & Experimental Evidence | > 2 pubs w/ convincing evidence over time (>3 yrs) |
| <b>Assigned Points</b>                  |                                                                                                | <b>0</b>                                                                   | <b>0</b>                               | <b>NO</b>                                          |
| <b>CALCULATED CLASSIFICATION</b>        |                                                                                                | <b>LIMITED</b>                                                             | <b>1-6</b>                             |                                                    |
|                                         |                                                                                                | <b>MODERATE</b>                                                            | <b>7-11</b>                            |                                                    |
|                                         |                                                                                                | <b>STRONG</b>                                                              | <b>12-18</b>                           |                                                    |
|                                         |                                                                                                | <b>DEFINITIVE</b>                                                          | <b>12-18 AND replication over time</b> |                                                    |
| Valid contradictory evidence (Y/N)*     | NO                                                                                             |                                                                            |                                        |                                                    |
| <b>CALCULATED CLASSIFICATION (DATE)</b> |                                                                                                | <b>NO REPORTED EVIDENCE</b><br>07/18/2016                                  |                                        |                                                    |
| <b>EXPERT CURATION (DATE)</b>           |                                                                                                | <b>NO REPORTED EVIDENCE</b><br>12/01/2016                                  |                                        |                                                    |

**Figure S39: Summary matrix and classification for *PMS2* and pancreatic cancer.**

**PSD3 and autosomal dominant antecubital pterygium syndrome**

| Evidence Type                                  |                                                                                     | Case Information Type                        |                                                                                   | Guidelines                                                        |        |        | Scores |             | PMIDs/Notes                                                       |
|------------------------------------------------|-------------------------------------------------------------------------------------|----------------------------------------------|-----------------------------------------------------------------------------------|-------------------------------------------------------------------|--------|--------|--------|-------------|-------------------------------------------------------------------|
|                                                |                                                                                     |                                              |                                                                                   | Default                                                           | Range  | Max    | Points | Tally       |                                                                   |
| Genetic Evidence                               | Case-Level Data                                                                     | Variant Evidence                             | Autosomal Dominant or X-linked Disorder                                           | Variant is de novo                                                | 2      | 0-3    | 12     |             |                                                                   |
|                                                |                                                                                     |                                              |                                                                                   | Proband with predicted or proven null variant                     | 1.5    | 0-2    | 10     |             |                                                                   |
|                                                |                                                                                     |                                              |                                                                                   | Proband with other variant type with some evidence of gene impact | 0.5    | 0-1.5  | 7      | 0.5         | 0.5                                                               |
|                                                |                                                                                     | Autosomal Recessive Disease                  | Two variants in trans and at least one de novo or a predicted/proven null variant | 2                                                                 | 0-3    | 12     |        |             |                                                                   |
|                                                | Two variants (not predicted/proven null) with some evidence of gene impact in trans |                                              | 1                                                                                 | 0-1.5                                                             |        |        |        |             |                                                                   |
| Segregation Evidence                           | Evidence of segregation in one or more families                                     | LOD Score Examples                           | 3<br>2<br>1.5<br>1                                                                | 5<br>4<br>3<br>1.5                                                | 0-7    | 7      | 4.0    | 4           | Bayram Y et al. 2016 Feb (26752647) <sup>61</sup> (LOD score 1.8) |
| Case-Control Data                              | Case-Control Study Type                                                             | Case-Control Quality Criteria                | Guidelines                                                                        |                                                                   |        | Scores |        | PMIDs/Notes |                                                                   |
|                                                |                                                                                     |                                              | Points/Study                                                                      | Max                                                               | Points | Tally  |        |             |                                                                   |
|                                                | Single Variant Analysis                                                             | 1. Variant Detection Methodology<br>2. Power | 0-6                                                                               | 12                                                                |        |        |        |             |                                                                   |
| Aggregate Variant Analysis                     | 3. Bias and confounding<br>4. Statistical Significance                              | 0-6                                          | 12                                                                                |                                                                   |        |        |        |             |                                                                   |
| Total Genetic Evidence Points (Maximum 12)     |                                                                                     |                                              |                                                                                   |                                                                   |        |        |        | 4.5         |                                                                   |
| Experimental Evidence                          | Function                                                                            | Evidence Type                                | Guidelines                                                                        |                                                                   |        | Scores |        | PMIDs/Notes |                                                                   |
|                                                |                                                                                     |                                              | Default                                                                           | Range                                                             | Max    | Points | Tally  |             |                                                                   |
|                                                | Functional Alteration                                                               | Biochemical Function                         | 0.5                                                                               | 0 - 2                                                             | 2      |        |        |             |                                                                   |
|                                                |                                                                                     | Protein Interaction                          | 0.5                                                                               | 0 - 2                                                             |        |        |        |             |                                                                   |
|                                                | Models & Rescue                                                                     | Expression                                   | 0.5                                                                               | 0 - 2                                                             | 2      |        |        |             |                                                                   |
| Cells from affected individual                 |                                                                                     | 1                                            | 0 - 2                                                                             |                                                                   |        |        |        |             |                                                                   |
| Models & Rescue                                | Engineered cells                                                                    | 0.5                                          | 0 - 1                                                                             | 4                                                                 |        |        |        |             |                                                                   |
|                                                | Animal model                                                                        | 2                                            | 0 - 4                                                                             |                                                                   |        |        |        |             |                                                                   |
|                                                | Cell culture model system                                                           | 1                                            | 0 - 2                                                                             |                                                                   |        |        |        |             |                                                                   |
|                                                | Rescue in animal model                                                              | 2                                            | 0 - 4                                                                             |                                                                   |        |        |        |             |                                                                   |
| Rescue in engineered equivalent                | 1                                                                                   | 0 - 2                                        |                                                                                   |                                                                   |        |        |        |             |                                                                   |
| Total Experimental Evidence Points (Maximum 6) |                                                                                     |                                              |                                                                                   |                                                                   |        |        |        | 0           |                                                                   |

**Figure S40: Summary of evidence supporting a relationship between PSD3 and autosomal dominant antecubital pterygium syndrome.**

| Assertion criteria                      | Genetic Evidence (0-12 points)                                                                 | Experimental Evidence (0-6 points)                                         | Total Points (0-18)                    | Replication Over Time (Y/N)                        |
|-----------------------------------------|------------------------------------------------------------------------------------------------|----------------------------------------------------------------------------|----------------------------------------|----------------------------------------------------|
| <b>Description</b>                      | Case-level, family segregation, or case-control data that support the gene-disease association | Gene-level experimental evidence that support the gene-disease association | Sum of Genetic & Experimental Evidence | > 2 pubs w/ convincing evidence over time (>3 yrs) |
| <b>Assigned Points</b>                  | <b>4.5</b>                                                                                     | <b>0</b>                                                                   | <b>4.5</b>                             | <b>NO</b>                                          |
| <b>CALCULATED CLASSIFICATION</b>        |                                                                                                | <b>LIMITED</b>                                                             | <b>1-6</b>                             |                                                    |
|                                         |                                                                                                | <b>MODERATE</b>                                                            | <b>7-11</b>                            |                                                    |
|                                         |                                                                                                | <b>STRONG</b>                                                              | <b>12-18</b>                           |                                                    |
|                                         |                                                                                                | <b>DEFINITIVE</b>                                                          | <b>12-18 AND replication over time</b> |                                                    |
| Valid contradictory evidence (Y/N)*     | NO                                                                                             |                                                                            |                                        |                                                    |
| <b>CALCULATED CLASSIFICATION (DATE)</b> |                                                                                                | <b>LIMITED</b><br>06/03/2016                                               |                                        |                                                    |
| <b>EXPERT CURATION (DATE)</b>           |                                                                                                | <b>LIMITED</b><br>11/24/2016                                               |                                        |                                                    |

**Figure S41: Summary matrix and classification for *PSD3* and autosomal dominant antecubital pterygium syndrome.**

| RAD51C and autosomal recessive Fanconi anemia |                                                |                                                                                                        |                                                                                     |                                                                   |        |        |       |             |                                                                                              |                                                |
|-----------------------------------------------|------------------------------------------------|--------------------------------------------------------------------------------------------------------|-------------------------------------------------------------------------------------|-------------------------------------------------------------------|--------|--------|-------|-------------|----------------------------------------------------------------------------------------------|------------------------------------------------|
|                                               | Evidence Type                                  | Case Information Type                                                                                  | Guidelines                                                                          |                                                                   |        | Scores |       | PMIDs/Notes |                                                                                              |                                                |
|                                               |                                                |                                                                                                        | Default                                                                             | Range                                                             | Max    | Points | Tally |             |                                                                                              |                                                |
| Genetic Evidence                              | Case-Level Data                                | Variant Evidence                                                                                       | Autosomal Dominant or X-linked Disorder                                             | Variant is de novo                                                |        | 2      | 0-3   | 12          |                                                                                              |                                                |
|                                               |                                                |                                                                                                        |                                                                                     | Proband with predicted or proven null variant                     |        | 1.5    | 0-2   | 10          |                                                                                              |                                                |
|                                               |                                                |                                                                                                        |                                                                                     | Proband with other variant type with some evidence of gene impact |        | 0.5    | 0-1.5 | 7           |                                                                                              |                                                |
|                                               |                                                | Autosomal Recessive Disease                                                                            | Two variants in trans and at least one de novo or a predicted/proven null variant   |                                                                   | 2      | 0-3    | 12    | 1           | Vaz F et al. 2010 May (20400963) <sup>84</sup>                                               |                                                |
|                                               |                                                |                                                                                                        | Two variants (not predicted/proven null) with some evidence of gene impact in trans |                                                                   | 1      | 0-1.5  |       |             |                                                                                              | 1.0                                            |
|                                               | Segregation Evidence                           | Evidence of segregation in one or more families                                                        | LOD Score Examples                                                                  | 3                                                                 | 5      | 0-7    | 7     | 1.0         | 1                                                                                            | Vaz F et al. 2010 May (20400963) <sup>84</sup> |
|                                               |                                                |                                                                                                        |                                                                                     | 2                                                                 | 4      |        |       |             |                                                                                              |                                                |
|                                               |                                                |                                                                                                        |                                                                                     | 1.5                                                               | 3      |        |       |             |                                                                                              |                                                |
|                                               |                                                |                                                                                                        |                                                                                     | 1                                                                 | 1.5    |        |       |             |                                                                                              |                                                |
|                                               |                                                |                                                                                                        |                                                                                     |                                                                   |        |        |       |             |                                                                                              |                                                |
| Case-Control Data                             | Case-Control Study Type                        | Case-Control Quality Criteria                                                                          |                                                                                     | Guidelines                                                        |        | Scores |       | PMIDs/Notes |                                                                                              |                                                |
|                                               |                                                |                                                                                                        | Points/Study                                                                        | Max                                                               | Points | Tally  |       |             |                                                                                              |                                                |
|                                               | Single Variant Analysis                        | 1. Variant Detection Methodology<br>2. Power<br>3. Bias and confounding<br>4. Statistical Significance |                                                                                     | 0-6                                                               | 12     |        |       |             |                                                                                              |                                                |
|                                               | Aggregate Variant Analysis                     |                                                                                                        |                                                                                     | 0-6                                                               | 12     |        |       |             |                                                                                              |                                                |
| Total Genetic Evidence Points (Maximum 12)    |                                                |                                                                                                        |                                                                                     |                                                                   |        |        | 2     |             |                                                                                              |                                                |
| Experimental Evidence                         | Function                                       | Biochemical Function                                                                                   |                                                                                     | 0.5                                                               | 0 - 2  | 2      | 0.5   | 0.5         | Somyajit K et al. 2012 Jan 27 (22167183) <sup>85</sup>                                       |                                                |
|                                               |                                                | Protein Interaction                                                                                    |                                                                                     | 0.5                                                               | 0 - 2  |        |       |             |                                                                                              |                                                |
|                                               |                                                | Expression                                                                                             |                                                                                     | 0.5                                                               | 0 - 2  |        |       |             |                                                                                              |                                                |
|                                               | Functional Alteration                          | Cells from affected individual                                                                         |                                                                                     | 1                                                                 | 0 - 2  | 2      | 3.0   | 2           | Vaz F et al. 2010 May (20400963); Somyajit K et al. 2012 Jan 27 (22167183) <sup>84, 85</sup> |                                                |
|                                               |                                                | Engineered cells                                                                                       |                                                                                     | 0.5                                                               | 0 - 1  |        |       |             |                                                                                              |                                                |
|                                               | Models & Rescue                                | Animal model                                                                                           |                                                                                     | 2                                                                 | 0 - 4  | 4      | 3.0   | 3           | Vaz F et al. 2010 May (20400963) <sup>84</sup>                                               |                                                |
|                                               |                                                | Cell culture model system                                                                              |                                                                                     | 1                                                                 | 0 - 2  |        |       |             |                                                                                              |                                                |
|                                               |                                                | Rescue in animal model                                                                                 |                                                                                     | 2                                                                 | 0 - 4  |        |       |             |                                                                                              |                                                |
|                                               |                                                | Rescue in engineered equivalent                                                                        |                                                                                     | 1                                                                 | 0 - 2  |        |       |             |                                                                                              |                                                |
|                                               | Total Experimental Evidence Points (Maximum 6) |                                                                                                        |                                                                                     |                                                                   |        |        |       | 5.5         |                                                                                              |                                                |

Figure S42: Summary of evidence supporting a relationship between *RAD51C* and autosomal recessive Fanconi anemia.

| Assertion criteria                      | Genetic Evidence (0-12 points)                                                                 | Experimental Evidence (0-6 points)                                         | Total Points (0-18)                    | Replication Over Time (Y/N)                        |
|-----------------------------------------|------------------------------------------------------------------------------------------------|----------------------------------------------------------------------------|----------------------------------------|----------------------------------------------------|
| <b>Description</b>                      | Case-level, family segregation, or case-control data that support the gene-disease association | Gene-level experimental evidence that support the gene-disease association | Sum of Genetic & Experimental Evidence | > 2 pubs w/ convincing evidence over time (>3 yrs) |
| <b>Assigned Points</b>                  | <b>2</b>                                                                                       | <b>5.5</b>                                                                 | <b>7.5</b>                             | <b>NO</b>                                          |
| <b>CALCULATED CLASSIFICATION</b>        |                                                                                                | <b>LIMITED</b>                                                             | <b>1-6</b>                             |                                                    |
|                                         |                                                                                                | <b>MODERATE</b>                                                            | <b>7-11</b>                            |                                                    |
|                                         |                                                                                                | <b>STRONG</b>                                                              | <b>12-18</b>                           |                                                    |
|                                         |                                                                                                | <b>DEFINITIVE</b>                                                          | <b>12-18 AND replication over time</b> |                                                    |
| Valid contradictory evidence (Y/N)*     | NO                                                                                             |                                                                            |                                        |                                                    |
| <b>CALCULATED CLASSIFICATION (DATE)</b> |                                                                                                | <b>MODERATE</b><br>06/01/2016                                              |                                        |                                                    |
| <b>EXPERT CURATION (DATE)</b>           |                                                                                                | <b>MODERATE</b><br>01/05/2017                                              |                                        |                                                    |

**Figure S43: Summary matrix and classification for *RAD51C* and autosomal recessive Fanconi anemia.**

***RAD51D* and autosomal dominant hereditary breast cancer**

|                                                       | Evidence Type              | Case Information Type                                                                                  | Guidelines                                                                          |       |     | Scores |            | PMIDs/Notes                                                                                      |   |                                                                                                                                                                                                                                                             |
|-------------------------------------------------------|----------------------------|--------------------------------------------------------------------------------------------------------|-------------------------------------------------------------------------------------|-------|-----|--------|------------|--------------------------------------------------------------------------------------------------|---|-------------------------------------------------------------------------------------------------------------------------------------------------------------------------------------------------------------------------------------------------------------|
|                                                       |                            |                                                                                                        | Default                                                                             | Range | Max | Points | Tally      |                                                                                                  |   |                                                                                                                                                                                                                                                             |
| Genetic Evidence                                      | Variant Evidence           | Autosomal Dominant or X-linked Disorder                                                                | Variant is de novo                                                                  |       | 2   | 0-3    | 12         |                                                                                                  |   |                                                                                                                                                                                                                                                             |
|                                                       |                            |                                                                                                        | Proband with predicted or proven null variant                                       |       | 1.5 | 0-2    | 10         | 1.0                                                                                              | 1 | Baker JL et al. 2015 Feb (25445424); Loveday C et al. 2011 Aug 7 (21822267); Pelttari LM et al. 2012 Jul (22652533); Osher DJ et al. 2012 Apr 10 (22415235) <sup>86-89</sup> (Due to the common nature of the disease, opting to give 0.1 points per case.) |
|                                                       |                            |                                                                                                        | Proband with other variant type with some evidence of gene impact                   |       | 0.5 | 0-1.5  | 7          |                                                                                                  |   |                                                                                                                                                                                                                                                             |
|                                                       |                            | Autosomal Recessive Disease                                                                            | Two variants in trans and at least one de novo or a predicted/proven null variant   |       | 2   | 0-3    | 12         |                                                                                                  |   |                                                                                                                                                                                                                                                             |
|                                                       |                            |                                                                                                        | Two variants (not predicted/proven null) with some evidence of gene impact in trans |       | 1   | 0-1.5  |            |                                                                                                  |   |                                                                                                                                                                                                                                                             |
|                                                       | Segregation Evidence       | Evidence of segregation in one or more families                                                        | LOD Score Examples                                                                  | 3     | 5   | 0-7    | 7          |                                                                                                  |   |                                                                                                                                                                                                                                                             |
|                                                       |                            |                                                                                                        |                                                                                     | 2     | 4   |        |            |                                                                                                  |   |                                                                                                                                                                                                                                                             |
|                                                       |                            |                                                                                                        |                                                                                     | 1.5   | 3   |        |            |                                                                                                  |   |                                                                                                                                                                                                                                                             |
|                                                       |                            |                                                                                                        |                                                                                     | 1     | 1.5 |        |            |                                                                                                  |   |                                                                                                                                                                                                                                                             |
|                                                       |                            |                                                                                                        |                                                                                     |       |     |        |            |                                                                                                  |   |                                                                                                                                                                                                                                                             |
| Case-Level Data                                       | Case-Control Study Type    | Case-Control Quality Criteria                                                                          | Guidelines                                                                          |       |     | Scores |            | PMIDs/Notes                                                                                      |   |                                                                                                                                                                                                                                                             |
|                                                       |                            |                                                                                                        | Points/Study                                                                        |       | Max | Points | Tally      |                                                                                                  |   |                                                                                                                                                                                                                                                             |
|                                                       | Single Variant Analysis    | 1. Variant Detection Methodology<br>2. Power<br>3. Bias and confounding<br>4. Statistical Significance | 0-6                                                                                 |       | 12  |        |            |                                                                                                  |   |                                                                                                                                                                                                                                                             |
|                                                       | Aggregate Variant Analysis |                                                                                                        | 0-6                                                                                 |       | 12  |        |            |                                                                                                  |   |                                                                                                                                                                                                                                                             |
| <b>Total Genetic Evidence Points (Maximum 12)</b>     |                            |                                                                                                        |                                                                                     |       |     |        | <b>4.5</b> |                                                                                                  |   |                                                                                                                                                                                                                                                             |
| Experimental Evidence                                 | Evidence Category          | Evidence Type                                                                                          | Guidelines                                                                          |       |     | Scores |            | PMIDs/Notes                                                                                      |   |                                                                                                                                                                                                                                                             |
|                                                       |                            |                                                                                                        | Default                                                                             | Range | Max | Points | Tally      |                                                                                                  |   |                                                                                                                                                                                                                                                             |
|                                                       | Function                   | Biochemical Function                                                                                   | 0.5                                                                                 | 0 - 2 | 2   | 1.5    | 1.5        | Schild D et al. 2000 Jun 2 (10749867); Martin RW et al. 2007 Oct 15 (17942895) <sup>90, 91</sup> |   |                                                                                                                                                                                                                                                             |
|                                                       |                            | Protein Interaction                                                                                    | 0.5                                                                                 | 0 - 2 |     |        |            |                                                                                                  |   |                                                                                                                                                                                                                                                             |
|                                                       |                            | Expression                                                                                             | 0.5                                                                                 | 0 - 2 |     |        |            |                                                                                                  |   |                                                                                                                                                                                                                                                             |
|                                                       | Functional Alteration      | Cells from affected individual                                                                         | 1                                                                                   | 0 - 2 | 2   |        |            |                                                                                                  |   |                                                                                                                                                                                                                                                             |
|                                                       |                            | Engineered cells                                                                                       | 0.5                                                                                 | 0 - 1 |     |        |            |                                                                                                  |   |                                                                                                                                                                                                                                                             |
|                                                       | Models & Rescue            | Animal model                                                                                           | 2                                                                                   | 0 - 4 | 4   | 2.0    | 2          | Smiraldo PG et al. 2005 Mar 15 (15781618) <sup>92</sup>                                          |   |                                                                                                                                                                                                                                                             |
|                                                       |                            | Cell culture model system                                                                              | 1                                                                                   | 0 - 2 |     |        |            |                                                                                                  |   |                                                                                                                                                                                                                                                             |
|                                                       |                            | Rescue in animal model                                                                                 | 2                                                                                   | 0 - 4 |     |        |            |                                                                                                  |   |                                                                                                                                                                                                                                                             |
| Rescue in engineered equivalent                       |                            | 1                                                                                                      | 0 - 2                                                                               |       |     |        |            |                                                                                                  |   |                                                                                                                                                                                                                                                             |
| <b>Total Experimental Evidence Points (Maximum 6)</b> |                            |                                                                                                        |                                                                                     |       |     |        | <b>3.5</b> |                                                                                                  |   |                                                                                                                                                                                                                                                             |

**Figure S44: Summary of evidence for a relationship between *RAD51D* and autosomal dominant hereditary breast cancer.**

| Assertion criteria                  | Genetic Evidence (0-12 points)                                                                                                                                                                                                                                                                                                                                               | Experimental Evidence (0-6 points)                                         | Total Points (0-18)                    | Replication Over Time (Y/N)                        |
|-------------------------------------|------------------------------------------------------------------------------------------------------------------------------------------------------------------------------------------------------------------------------------------------------------------------------------------------------------------------------------------------------------------------------|----------------------------------------------------------------------------|----------------------------------------|----------------------------------------------------|
| Description                         | Case-level, family segregation, or case-control data that support the gene-disease association                                                                                                                                                                                                                                                                               | Gene-level experimental evidence that support the gene-disease association | Sum of Genetic & Experimental Evidence | > 2 pubs w/ convincing evidence over time (>3 yrs) |
| Assigned Points                     | 1                                                                                                                                                                                                                                                                                                                                                                            | 3.5                                                                        | 4.5                                    | NO                                                 |
| CALCULATED CLASSIFICATION           |                                                                                                                                                                                                                                                                                                                                                                              | LIMITED                                                                    | 1-6                                    |                                                    |
|                                     |                                                                                                                                                                                                                                                                                                                                                                              | MODERATE                                                                   | 7-11                                   |                                                    |
|                                     |                                                                                                                                                                                                                                                                                                                                                                              | STRONG                                                                     | 12-18                                  |                                                    |
|                                     |                                                                                                                                                                                                                                                                                                                                                                              | DEFINITIVE                                                                 | 12-18 AND replication over time        |                                                    |
| Valid contradictory evidence (Y/N)* | YES Dowty JG et al. 2008 Nov (18058226); Jara L et al. 2010 Aug (20054644); Wickramanayake A et al. 2012 Dec (22986143); Gutiérrez-Enríquez S et al. 2014 May 1 (24130102) <sup>93-96</sup> (These studies have reported OR/HR that indicate no association between <i>RAD51D</i> and breast cancer, or found any truncating variants in breast cancer-only cases/families.) |                                                                            |                                        |                                                    |
| CALCULATED CLASSIFICATION (DATE)    |                                                                                                                                                                                                                                                                                                                                                                              | CONFLICTING EVIDENCE REPORTED                                              |                                        |                                                    |
|                                     |                                                                                                                                                                                                                                                                                                                                                                              | LIMITED                                                                    |                                        |                                                    |
| EXPERT CURATION (DATE)              |                                                                                                                                                                                                                                                                                                                                                                              | 12/01/2016                                                                 |                                        |                                                    |

**Figure S45: Summary matrix and classification for *RAD51D* and autosomal dominant hereditary breast cancer.** The discrepancy between the experts and original biocurators is due to interpretation of the case-control studies. According to the experts consulted, current studies are not large enough to address the question of whether or not variants in *RAD51D* are relevant to breast cancer. Experimental evidence shows a link between *RAD51D* and homologous recombination, a function of other genes, such as *BRCA1* and *BRCA2*, known to be involved in hereditary breast cancer.

**RPS10 and autosomal dominant Diamond-Blackfan anemia**

|                                            | Evidence Type                                  | Case Information Type                                                                                  | Guidelines                                                                          |                                                                   |        | Scores |       | PMIDs/Notes |       |                                                                                                                                        |
|--------------------------------------------|------------------------------------------------|--------------------------------------------------------------------------------------------------------|-------------------------------------------------------------------------------------|-------------------------------------------------------------------|--------|--------|-------|-------------|-------|----------------------------------------------------------------------------------------------------------------------------------------|
|                                            |                                                |                                                                                                        | Default                                                                             | Range                                                             | Max    | Points | Tally |             |       |                                                                                                                                        |
| Genetic Evidence                           | Case-Level Data                                | Variant Evidence                                                                                       | Autosomal Dominant or X-linked Disorder                                             | Variant is de novo                                                | 2      | 0-3    | 12    | 4.0         | 4     | Doherty L et al. 2010 Feb 12 (20116044); Smetanina NS et al. 2015 Sep (25946618) <sup>97, 98</sup>                                     |
|                                            |                                                |                                                                                                        |                                                                                     | Proband with predicted or proven null variant                     | 1.5    | 0-2    | 10    | 10.0        | 10    | Doherty L et al. 2010 Feb 12 (20116044); Smetanina NS et al. 2015 Sep (25946618); Yazaki M et al. 2012 May (22510774) <sup>97-99</sup> |
|                                            |                                                |                                                                                                        |                                                                                     | Proband with other variant type with some evidence of gene impact | 0.5    | 0-1.5  | 7     | 0.0         | 0     |                                                                                                                                        |
|                                            |                                                | Autosomal Recessive Disease                                                                            | Two variants in trans and at least one de novo or a predicted/proven null variant   | 2                                                                 | 0-3    | 12     |       |             |       |                                                                                                                                        |
|                                            |                                                |                                                                                                        | Two variants (not predicted/proven null) with some evidence of gene impact in trans | 1                                                                 | 0-1.5  |        |       |             |       |                                                                                                                                        |
|                                            | Segregation Evidence                           | Evidence of segregation in one or more families                                                        | LOD Score Examples                                                                  | 3                                                                 | 5      | 0-7    | 7     |             |       |                                                                                                                                        |
|                                            |                                                |                                                                                                        |                                                                                     | 2                                                                 | 4      |        |       |             |       |                                                                                                                                        |
|                                            |                                                |                                                                                                        |                                                                                     | 1.5                                                               | 3      |        |       |             |       |                                                                                                                                        |
|                                            |                                                |                                                                                                        |                                                                                     | 1                                                                 | 1.5    |        |       |             |       |                                                                                                                                        |
|                                            |                                                |                                                                                                        |                                                                                     |                                                                   |        |        |       |             |       |                                                                                                                                        |
| Case-Control Data                          | Case-Control Study Type                        | Case-Control Quality Criteria                                                                          | Guidelines                                                                          |                                                                   |        | Scores |       | PMIDs/Notes |       |                                                                                                                                        |
|                                            |                                                |                                                                                                        | Points/Study                                                                        | Max                                                               | Points | Tally  |       |             |       |                                                                                                                                        |
|                                            | Single Variant Analysis                        | 1. Variant Detection Methodology<br>2. Power<br>3. Bias and confounding<br>4. Statistical Significance | 0-6                                                                                 | 12                                                                |        |        |       |             |       |                                                                                                                                        |
|                                            | Aggregate Variant Analysis                     |                                                                                                        | 0-6                                                                                 | 12                                                                |        |        |       |             |       |                                                                                                                                        |
| Total Genetic Evidence Points (Maximum 12) |                                                |                                                                                                        |                                                                                     |                                                                   |        |        |       | 12          |       |                                                                                                                                        |
| Experimental Evidence                      | Function                                       | Biochemical Function                                                                                   | 0.5                                                                                 | 0 - 2                                                             | 2      | 1.5    | 1.5   | PMIDs/Notes |       |                                                                                                                                        |
|                                            |                                                |                                                                                                        | Protein Interaction                                                                 | 0.5                                                               |        |        |       |             | 0 - 2 |                                                                                                                                        |
|                                            | Expression                                     |                                                                                                        | 0.5                                                                                 | 0 - 2                                                             |        |        |       |             |       |                                                                                                                                        |
|                                            | Functional Alteration                          | Cells from affected individual                                                                         | 1                                                                                   | 0 - 2                                                             | 2      |        |       |             |       |                                                                                                                                        |
|                                            |                                                | Engineered cells                                                                                       | 0.5                                                                                 | 0 - 1                                                             |        |        |       |             |       |                                                                                                                                        |
|                                            | Models & Rescue                                | Animal model                                                                                           | 2                                                                                   | 0 - 4                                                             | 4      |        |       |             |       |                                                                                                                                        |
|                                            |                                                | Cell culture model system                                                                              | 1                                                                                   | 0 - 2                                                             |        |        |       |             |       |                                                                                                                                        |
|                                            |                                                | Rescue in animal model                                                                                 | 2                                                                                   | 0 - 4                                                             |        |        |       |             |       |                                                                                                                                        |
|                                            |                                                | Rescue in engineered equivalent                                                                        | 1                                                                                   | 0 - 2                                                             |        |        |       |             |       |                                                                                                                                        |
|                                            | Total Experimental Evidence Points (Maximum 6) |                                                                                                        |                                                                                     |                                                                   |        |        |       |             | 1.5   |                                                                                                                                        |

**Figure S46: Summary of evidence supporting a relationship between RPS10 and autosomal dominant Diamond-Blackfan anemia.**



| Assertion criteria                      | Genetic Evidence (0-12 points)                                                                 | Experimental Evidence (0-6 points)                                         | Total Points (0-18)                    | Replication Over Time (Y/N)                        |
|-----------------------------------------|------------------------------------------------------------------------------------------------|----------------------------------------------------------------------------|----------------------------------------|----------------------------------------------------|
| <b>Description</b>                      | Case-level, family segregation, or case-control data that support the gene-disease association | Gene-level experimental evidence that support the gene-disease association | Sum of Genetic & Experimental Evidence | > 2 pubs w/ convincing evidence over time (>3 yrs) |
| <b>Assigned Points</b>                  | <b>12</b>                                                                                      | <b>1.5</b>                                                                 | <b>13.5</b>                            | <b>YES</b>                                         |
| <b>CALCULATED CLASSIFICATION</b>        |                                                                                                | <b>LIMITED</b>                                                             | <b>1-6</b>                             |                                                    |
|                                         |                                                                                                | <b>MODERATE</b>                                                            | <b>7-11</b>                            |                                                    |
|                                         |                                                                                                | <b>STRONG</b>                                                              | <b>12-18</b>                           |                                                    |
|                                         |                                                                                                | <b>DEFINITIVE</b>                                                          | <b>12-18 AND replication over time</b> |                                                    |
| Valid contradictory evidence (Y/N)*     | NO                                                                                             |                                                                            |                                        |                                                    |
| <b>CALCULATED CLASSIFICATION (DATE)</b> |                                                                                                | <b>DEFINITIVE</b><br>07/04/2016                                            |                                        |                                                    |
| <b>EXPERT CURATION (DATE)</b>           |                                                                                                | <b>DEFINITIVE</b><br>01/19/2017                                            |                                        |                                                    |

**Figure S47: Summary matrix and classification for *RPS10* and autosomal dominant Diamond-Blackfan anemia.**

**RPS24 and autosomal dominant Diamond-Blackfan anemia**

|                                                | Evidence Type              | Case Information Type                                  | Guidelines                                                                          |       |        | Scores |       | PMIDs/Notes                                                                                                                                        |     |                                                                                                                                                |
|------------------------------------------------|----------------------------|--------------------------------------------------------|-------------------------------------------------------------------------------------|-------|--------|--------|-------|----------------------------------------------------------------------------------------------------------------------------------------------------|-----|------------------------------------------------------------------------------------------------------------------------------------------------|
|                                                |                            |                                                        | Default                                                                             | Range | Max    | Points | Tally |                                                                                                                                                    |     |                                                                                                                                                |
| Genetic Evidence                               | Variant Evidence           | Autosomal Dominant or X-linked Disorder                | Variant is de novo                                                                  |       | 2      | 0-3    | 12    | 6.0                                                                                                                                                | 6   | Quarello P et al. 2010 Feb (19773262); Landowski M et al. 2013 Nov (23812780); Smetanina NS et al. 2015 Sep (25946618) <sup>98, 102, 103</sup> |
|                                                |                            |                                                        | Proband with predicted or proven null variant                                       |       | 1.5    | 0-2    | 10    | 4.5                                                                                                                                                | 4.5 | Gazda HT et al. 2006 Dec (17186470) <sup>104</sup>                                                                                             |
|                                                |                            |                                                        | Proband with other variant type with some evidence of gene impact                   |       | 0.5    | 0-1.5  | 7     |                                                                                                                                                    |     |                                                                                                                                                |
|                                                |                            | Autosomal Recessive Disease                            | Two variants in trans and at least one de novo or a predicted/proven null variant   |       | 2      | 0-3    | 12    |                                                                                                                                                    |     |                                                                                                                                                |
|                                                |                            |                                                        | Two variants (not predicted/proven null) with some evidence of gene impact in trans |       | 1      | 0-1.5  |       |                                                                                                                                                    |     |                                                                                                                                                |
|                                                | Segregation Evidence       | Evidence of segregation in one or more families        | LOD Score Examples                                                                  | 3     | 5      | 0-7    | 7     |                                                                                                                                                    |     |                                                                                                                                                |
|                                                |                            |                                                        |                                                                                     | 2     | 4      |        |       |                                                                                                                                                    |     |                                                                                                                                                |
|                                                |                            |                                                        |                                                                                     | 1.5   | 3      |        |       |                                                                                                                                                    |     |                                                                                                                                                |
|                                                |                            |                                                        |                                                                                     | 1     | 1.5    |        |       |                                                                                                                                                    |     |                                                                                                                                                |
|                                                |                            |                                                        |                                                                                     |       |        |        |       |                                                                                                                                                    |     |                                                                                                                                                |
| Case-Control Data                              | Case-Control Study Type    | Case-Control Quality Criteria                          | Guidelines                                                                          |       |        | Scores |       | PMIDs/Notes                                                                                                                                        |     |                                                                                                                                                |
|                                                |                            |                                                        | Points/Study                                                                        | Max   | Points | Tally  |       |                                                                                                                                                    |     |                                                                                                                                                |
|                                                | Single Variant Analysis    | 1. Variant Detection Methodology<br>2. Power           | 0-6                                                                                 | 12    |        |        |       |                                                                                                                                                    |     |                                                                                                                                                |
|                                                | Aggregate Variant Analysis | 3. Bias and confounding<br>4. Statistical Significance | 0-6                                                                                 | 12    |        |        |       |                                                                                                                                                    |     |                                                                                                                                                |
| Total Genetic Evidence Points (Maximum 12)     |                            |                                                        |                                                                                     |       |        |        | 10.5  |                                                                                                                                                    |     |                                                                                                                                                |
| Experimental Evidence                          | Function                   | Biochemical Function                                   | 0.5                                                                                 | 0 - 2 | 2      | 1.5    | 1.5   | Choesmel V et al. 2008 May 1 (18230666); Havugimana PC et al. 2012 Aug 31 (22939629); Gazda HT et al. 2006 Dec (17186470) <sup>100, 104, 105</sup> |     |                                                                                                                                                |
|                                                |                            | Protein Interaction                                    | 0.5                                                                                 | 0 - 2 |        |        |       |                                                                                                                                                    |     |                                                                                                                                                |
|                                                |                            | Expression                                             | 0.5                                                                                 | 0 - 2 |        |        |       |                                                                                                                                                    |     |                                                                                                                                                |
|                                                | Functional Alteration      | Cells from affected individual                         | 1                                                                                   | 0 - 2 | 2      | 2.0    | 2     |                                                                                                                                                    |     |                                                                                                                                                |
|                                                |                            | Engineered cells                                       | 0.5                                                                                 | 0 - 1 |        |        |       |                                                                                                                                                    |     |                                                                                                                                                |
|                                                | Models & Rescue            | Animal model                                           | 2                                                                                   | 0 - 4 | 4      |        |       |                                                                                                                                                    |     |                                                                                                                                                |
| Cell culture model system                      |                            | 1                                                      | 0 - 2                                                                               |       |        |        |       |                                                                                                                                                    |     |                                                                                                                                                |
| Rescue in animal model                         |                            | 2                                                      | 0 - 4                                                                               |       |        |        |       |                                                                                                                                                    |     |                                                                                                                                                |
| Rescue in engineered equivalent                |                            | 1                                                      | 0 - 2                                                                               |       |        |        |       |                                                                                                                                                    |     |                                                                                                                                                |
| Total Experimental Evidence Points (Maximum 6) |                            |                                                        |                                                                                     |       |        |        | 3.5   |                                                                                                                                                    |     |                                                                                                                                                |

**Figure S48: Summary of evidence supporting a relationship between *RPS24* and autosomal dominant Diamond-Blackfan anemia.**

| Assertion criteria                      | Genetic Evidence (0-12 points)                                                                 | Experimental Evidence (0-6 points)                                         | Total Points (0-18)                    | Replication Over Time (Y/N)                        |
|-----------------------------------------|------------------------------------------------------------------------------------------------|----------------------------------------------------------------------------|----------------------------------------|----------------------------------------------------|
| <b>Description</b>                      | Case-level, family segregation, or case-control data that support the gene-disease association | Gene-level experimental evidence that support the gene-disease association | Sum of Genetic & Experimental Evidence | > 2 pubs w/ convincing evidence over time (>3 yrs) |
| <b>Assigned Points</b>                  | <b>10.5</b>                                                                                    | <b>3.5</b>                                                                 | <b>14</b>                              | <b>YES</b>                                         |
| <b>CALCULATED CLASSIFICATION</b>        |                                                                                                | <b>LIMITED</b>                                                             | <b>1-6</b>                             |                                                    |
|                                         |                                                                                                | <b>MODERATE</b>                                                            | <b>7-11</b>                            |                                                    |
|                                         |                                                                                                | <b>STRONG</b>                                                              | <b>12-18</b>                           |                                                    |
|                                         |                                                                                                | <b>DEFINITIVE</b>                                                          | <b>12-18 AND replication over time</b> |                                                    |
| Valid contradictory evidence (Y/N)*     | NO                                                                                             |                                                                            |                                        |                                                    |
| <b>CALCULATED CLASSIFICATION (DATE)</b> |                                                                                                | <b>DEFINITIVE</b><br>07/04/2016                                            |                                        |                                                    |
| <b>EXPERT CURATION (DATE)</b>           |                                                                                                | <b>DEFINITIVE</b><br>01/17/2017                                            |                                        |                                                    |

**Figure S49: Summary matrix and classification for *RPS24* and autosomal dominant Diamond-Blackfan anemia.**

**SCN4B and autosomal dominant Long QT Syndrome**

| Evidence Type                                  |                                                                                     | Case Information Type                        |                                                                                   | Guidelines                                                        |        |        | Scores |             | PMIDs/Notes                                                                                                         |
|------------------------------------------------|-------------------------------------------------------------------------------------|----------------------------------------------|-----------------------------------------------------------------------------------|-------------------------------------------------------------------|--------|--------|--------|-------------|---------------------------------------------------------------------------------------------------------------------|
|                                                |                                                                                     |                                              |                                                                                   | Default                                                           | Range  | Max    | Points | Tally       |                                                                                                                     |
| Genetic Evidence                               | Case-Level Data                                                                     | Variant Evidence                             | Autosomal Dominant or X-linked Disorder                                           | Variant is de novo                                                | 2      | 0-3    | 12     |             |                                                                                                                     |
|                                                |                                                                                     |                                              |                                                                                   | Proband with predicted or proven null variant                     | 1.5    | 0-2    | 10     |             |                                                                                                                     |
|                                                |                                                                                     |                                              |                                                                                   | Proband with other variant type with some evidence of gene impact | 0.5    | 0-1.5  | 7      | 1.0         | 1                                                                                                                   |
|                                                |                                                                                     | Autosomal Recessive Disease                  | Two variants in trans and at least one de novo or a predicted/proven null variant | 2                                                                 | 0-3    | 12     |        |             |                                                                                                                     |
|                                                | Two variants (not predicted/proven null) with some evidence of gene impact in trans |                                              | 1                                                                                 | 0-1.5                                                             |        |        |        |             |                                                                                                                     |
| Segregation Evidence                           | Evidence of segregation in one or more families                                     | LOD Score Examples                           | 3<br>2<br>1.5<br>1                                                                | 5<br>4<br>3<br>1.5                                                | 0-7    | 7      | 1.0    | 1           | Medeiros-Domingo A et al. 2007 Jul 10 (17592081) <sup>106</sup>                                                     |
| Case-Control Data                              | Case-Control Study Type                                                             | Case-Control Quality Criteria                | Guidelines                                                                        |                                                                   |        | Scores |        | PMIDs/Notes |                                                                                                                     |
|                                                |                                                                                     |                                              | Points/Study                                                                      | Max                                                               | Points | Tally  |        |             |                                                                                                                     |
|                                                | Single Variant Analysis                                                             | 1. Variant Detection Methodology<br>2. Power | 0-6                                                                               | 12                                                                |        |        |        |             |                                                                                                                     |
| Aggregate Variant Analysis                     | 3. Bias and confounding<br>4. Statistical Significance                              | 0-6                                          | 12                                                                                |                                                                   |        |        |        |             |                                                                                                                     |
| Total Genetic Evidence Points (Maximum 12)     |                                                                                     |                                              |                                                                                   |                                                                   |        |        | 3      |             |                                                                                                                     |
| Experimental Evidence                          | Function                                                                            | Evidence Type                                | Biochemical Function                                                              | 0.5                                                               | 0 - 2  | 2      | 1.0    | 1           | Medeiros-Domingo A et al. 2007 Jul 10 (17592081) <sup>106</sup> (8x increase in late sodium current by mutant form) |
|                                                |                                                                                     |                                              | Protein Interaction                                                               | 0.5                                                               | 0 - 2  |        |        |             |                                                                                                                     |
|                                                | Functional Alteration                                                               | Evidence Type                                | Expression                                                                        | 0.5                                                               | 0 - 2  | 2      |        |             |                                                                                                                     |
|                                                |                                                                                     |                                              | Cells from affected individual                                                    | 1                                                                 | 0 - 2  |        |        |             |                                                                                                                     |
|                                                | Models & Rescue                                                                     | Evidence Type                                | Engineered cells                                                                  | 0.5                                                               | 0 - 1  | 4      |        |             |                                                                                                                     |
| Animal model                                   |                                                                                     |                                              | 2                                                                                 | 0 - 4                                                             |        |        |        |             |                                                                                                                     |
| Cell culture model system                      |                                                                                     |                                              | 1                                                                                 | 0 - 2                                                             |        |        |        |             |                                                                                                                     |
| Rescue in animal model                         |                                                                                     |                                              | 2                                                                                 | 0 - 4                                                             |        |        |        |             |                                                                                                                     |
| Rescue in engineered equivalent                | 1                                                                                   | 0 - 2                                        |                                                                                   |                                                                   |        |        |        |             |                                                                                                                     |
| Total Experimental Evidence Points (Maximum 6) |                                                                                     |                                              |                                                                                   |                                                                   |        |        | 1      |             |                                                                                                                     |

**Figure S50: Summary of evidence supporting a relationship between SCN4B and autosomal dominant Long QT Syndrome.**

| Assertion criteria                      | Genetic Evidence (0-12 points)                                                                 | Experimental Evidence (0-6 points)                                         | Total Points (0-18)                    | Replication Over Time (Y/N)                        |
|-----------------------------------------|------------------------------------------------------------------------------------------------|----------------------------------------------------------------------------|----------------------------------------|----------------------------------------------------|
| <b>Description</b>                      | Case-level, family segregation, or case-control data that support the gene-disease association | Gene-level experimental evidence that support the gene-disease association | Sum of Genetic & Experimental Evidence | > 2 pubs w/ convincing evidence over time (>3 yrs) |
| <b>Assigned Points</b>                  | <b>2</b>                                                                                       | <b>1</b>                                                                   | <b>3</b>                               | <b>NO</b>                                          |
| <b>CALCULATED CLASSIFICATION</b>        |                                                                                                | <b>LIMITED</b>                                                             | <b>1-6</b>                             |                                                    |
|                                         |                                                                                                | <b>MODERATE</b>                                                            | <b>7-11</b>                            |                                                    |
|                                         |                                                                                                | <b>STRONG</b>                                                              | <b>12-18</b>                           |                                                    |
|                                         |                                                                                                | <b>DEFINITIVE</b>                                                          | <b>12-18 AND replication over time</b> |                                                    |
| Valid contradictory evidence (Y/N)*     | NO                                                                                             |                                                                            |                                        |                                                    |
| <b>CALCULATED CLASSIFICATION (DATE)</b> |                                                                                                | <b>LIMITED</b><br>06/14/2016                                               |                                        |                                                    |
| <b>EXPERT CURATION (DATE)</b>           |                                                                                                | <b>LIMITED</b><br>12/15/16                                                 |                                        |                                                    |

**Figure S51: Summary matrix and classification for *SCN4B* and autosomal dominant Long QT Syndrome.**

### SKI and autosomal dominant Shprintzen-Goldberg syndrome

| Evidence Type                                         |                                                                                     | Case Information Type                                                                                  |                                                                                   | Guidelines                                                        |       |        | Scores |                                                    | PMIDs/Notes                                                                 |                                                                                                  |
|-------------------------------------------------------|-------------------------------------------------------------------------------------|--------------------------------------------------------------------------------------------------------|-----------------------------------------------------------------------------------|-------------------------------------------------------------------|-------|--------|--------|----------------------------------------------------|-----------------------------------------------------------------------------|--------------------------------------------------------------------------------------------------|
|                                                       |                                                                                     |                                                                                                        |                                                                                   | Default                                                           | Range | Max    | Points | Tally                                              |                                                                             |                                                                                                  |
| Genetic Evidence                                      | Case-Level Data                                                                     | Variant Evidence                                                                                       | Autosomal Dominant or X-linked Disorder                                           | Variant is de novo                                                | 2     | 0-3    | 12     | 12.0                                               | 12                                                                          | Carmignac V et al. 2012 Nov 2 (23103230); Doyle AJ et al. 2012 Nov (23023332) <sup>107,108</sup> |
|                                                       |                                                                                     |                                                                                                        |                                                                                   | Proband with predicted or proven null variant                     | 1.5   | 0-2    | 10     |                                                    |                                                                             |                                                                                                  |
|                                                       |                                                                                     |                                                                                                        |                                                                                   | Proband with other variant type with some evidence of gene impact | 0.5   | 0-1.5  | 7      | 5.0                                                | 5                                                                           | Doyle AJ et al. 2012 Nov (23023332); Carmignac V et al. 2012 Nov 2 (23103230) <sup>107,108</sup> |
|                                                       |                                                                                     | Autosomal Recessive Disease                                                                            | Two variants in trans and at least one de novo or a predicted/proven null variant | 2                                                                 | 0-3   | 12     |        |                                                    |                                                                             |                                                                                                  |
|                                                       | Two variants (not predicted/proven null) with some evidence of gene impact in trans |                                                                                                        | 1                                                                                 | 0-1.5                                                             |       |        |        |                                                    |                                                                             |                                                                                                  |
| Segregation Evidence                                  | Evidence of segregation in one or more families                                     | LOD Score Examples                                                                                     | 3                                                                                 | 5                                                                 | 0-7   | 7      | 2.0    | 2                                                  | Carmignac V et al. 2012 Nov 2 (23103230) <sup>107</sup>                     |                                                                                                  |
|                                                       |                                                                                     |                                                                                                        | 2                                                                                 | 4                                                                 |       |        |        |                                                    |                                                                             |                                                                                                  |
|                                                       |                                                                                     |                                                                                                        | 1.5                                                                               | 3                                                                 |       |        |        |                                                    |                                                                             |                                                                                                  |
|                                                       |                                                                                     |                                                                                                        | 1                                                                                 | 1.5                                                               |       |        |        |                                                    |                                                                             |                                                                                                  |
|                                                       |                                                                                     |                                                                                                        |                                                                                   |                                                                   |       |        |        |                                                    |                                                                             |                                                                                                  |
| Case-Control Data                                     | Case-Control Study Type                                                             | Case-Control Quality Criteria                                                                          |                                                                                   | Guidelines                                                        |       | Scores |        | PMIDs/Notes                                        |                                                                             |                                                                                                  |
|                                                       |                                                                                     |                                                                                                        |                                                                                   | Points/Study                                                      | Max   | Points | Tally  |                                                    |                                                                             |                                                                                                  |
|                                                       | Single Variant Analysis                                                             | 1. Variant Detection Methodology<br>2. Power<br>3. Bias and confounding<br>4. Statistical Significance |                                                                                   | 0-6                                                               | 12    |        |        |                                                    |                                                                             |                                                                                                  |
|                                                       |                                                                                     |                                                                                                        |                                                                                   | 0-6                                                               | 12    |        |        |                                                    |                                                                             |                                                                                                  |
| <b>Total Genetic Evidence Points (Maximum 12)</b>     |                                                                                     |                                                                                                        |                                                                                   |                                                                   |       |        |        | <b>16.5</b>                                        | <b>Additional genetic evidence available beyond 12 point maximum score.</b> |                                                                                                  |
| Experimental Evidence                                 | Function                                                                            | Biochemical Function                                                                                   | 0.5                                                                               | 0 - 2                                                             | 2     | 1.5    | 1.5    | Doyle AJ et al. 2012 Nov (23023332) <sup>108</sup> |                                                                             |                                                                                                  |
|                                                       |                                                                                     |                                                                                                        | 0.5                                                                               | 0 - 2                                                             |       |        |        |                                                    |                                                                             |                                                                                                  |
|                                                       |                                                                                     |                                                                                                        | 0.5                                                                               | 0 - 2                                                             |       |        |        |                                                    |                                                                             |                                                                                                  |
|                                                       | Functional Alteration                                                               | Cells from affected individual                                                                         | 1                                                                                 | 0 - 2                                                             | 2     | 1.0    | 1      | Doyle AJ et al. 2012 Nov (23023332) <sup>108</sup> |                                                                             |                                                                                                  |
|                                                       |                                                                                     |                                                                                                        | 0.5                                                                               | 0 - 1                                                             |       |        |        |                                                    |                                                                             |                                                                                                  |
|                                                       | Models & Rescue                                                                     | Animal model                                                                                           | 2                                                                                 | 0 - 4                                                             | 4     | 2.0    | 2      | Doyle AJ et al. 2012 Nov (23023332) <sup>108</sup> |                                                                             |                                                                                                  |
|                                                       |                                                                                     |                                                                                                        | 1                                                                                 | 0 - 2                                                             |       |        |        |                                                    |                                                                             |                                                                                                  |
|                                                       |                                                                                     |                                                                                                        | 2                                                                                 | 0 - 4                                                             |       |        |        |                                                    |                                                                             |                                                                                                  |
| 1                                                     |                                                                                     |                                                                                                        | 0 - 2                                                                             |                                                                   |       |        |        |                                                    |                                                                             |                                                                                                  |
| <b>Total Experimental Evidence Points (Maximum 6)</b> |                                                                                     |                                                                                                        |                                                                                   |                                                                   |       |        |        | <b>4.5</b>                                         | <b>Additional experimental data may be available.</b>                       |                                                                                                  |

**Figure S52: Summary of evidence supporting a relationship between SKI and autosomal dominant Shprintzen-Goldberg syndrome.**

| Assertion criteria                      | Genetic Evidence (0-12 points)                                                                 | Experimental Evidence (0-6 points)                                         | Total Points (0-18)                    | Replication Over Time (Y/N)                        |
|-----------------------------------------|------------------------------------------------------------------------------------------------|----------------------------------------------------------------------------|----------------------------------------|----------------------------------------------------|
| <b>Description</b>                      | Case-level, family segregation, or case-control data that support the gene-disease association | Gene-level experimental evidence that support the gene-disease association | Sum of Genetic & Experimental Evidence | > 2 pubs w/ convincing evidence over time (>3 yrs) |
| <b>Assigned Points</b>                  | <b>12</b>                                                                                      | <b>4.5</b>                                                                 | <b>16.5</b>                            | <b>YES</b>                                         |
| <b>CALCULATED CLASSIFICATION</b>        |                                                                                                | <b>LIMITED</b>                                                             | <b>1-6</b>                             |                                                    |
|                                         |                                                                                                | <b>MODERATE</b>                                                            | <b>7-11</b>                            |                                                    |
|                                         |                                                                                                | <b>STRONG</b>                                                              | <b>12-18</b>                           |                                                    |
|                                         |                                                                                                | <b>DEFINITIVE</b>                                                          | <b>12-18 AND replication over time</b> |                                                    |
| Valid contradictory evidence (Y/N)*     | NO                                                                                             |                                                                            |                                        |                                                    |
| <b>CALCULATED CLASSIFICATION (DATE)</b> |                                                                                                | <b>DEFINITIVE</b><br>06/02/2016                                            |                                        |                                                    |
| <b>EXPERT CURATION (DATE)</b>           |                                                                                                | <b>DEFINITIVE</b><br>12/01/2016                                            |                                        |                                                    |

**Figure S53: Summary matrix and classification for *SKI* and autosomal dominant Shprintzen-Goldberg syndrome.**

**SMAD3 and autosomal dominant aneurysm-osteoarthritis syndrome**

| Evidence Type                                  | Case Information Type                                                               | Guidelines                                                                                                                                                                                                                                                                                                                                                                                                                                                                                                                                                                                                                                                                                                                                                                                                                                                                                                                                                                                                                                                                                                                                                                                                                                                                                                                                                                                                                                                                                                                                                                                                                                                                                                                                                                                                                                                                                                                                                                                                                                                                                                                                                                                                                                                                                                                                                                                                                                                                                                                                                                                                                                                                                                                                                                                                                                                                                                                                                                                                                                                                                                                                                                                                                                                                                                                                                                                                                                                                                                                                                                                                                                                                                                                                                                                                                                                                                                                                                                                                                                                                                                                                                                                                                                                                                                                                                                                                                                             |                                         |                                                                   | Scores |       | PMIDs/Notes                                                                                   |                                                                                                                 |                                                                                                         |                                                                                                                                                   |                      |                                         |                    |                                                                                                                                                   |     |    |                                                                                                           |                     |     |                                               |            |     |       |                       |                                |                                                                                                                                                   |                                                                   |     |       |   |     |                  |                                                                                                                                                   |                             |                                                                                   |              |     |       |   |     |   |                                                                                               |                           |       |       |                        |   |                      |                                                 |                    |       |                                                |     |   |     |   |                                                                                                         |   |   |     |   |   |     |  |  |                   |                         |                               |            |  |        |  |             |              |     |        |       |                         |                                              |     |    |  |  |                            |                                                        |     |    |  |  |                                            |  |  |  |  |  |  |    |                                                                                                                 |                   |               |            |  |  |        |  |             |         |       |     |        |       |                                                                                                                                                                                                                                                                                                                                                                                                                                                                                                                                                                                                                                                                                                                                                                                                                                                                                                                                                                                                                                                                                                                                                                                                                                                                                                                                                                                         |  |  |  |  |  |  |                       |          |                      |     |       |   |     |   |                                                                                                           |                     |     |       |            |     |       |                       |                                |   |       |   |  |  |  |                  |     |       |                 |              |   |       |   |     |   |                                                                                               |                           |   |       |                        |   |       |                                 |   |       |                                                |  |  |  |  |  |  |
|------------------------------------------------|-------------------------------------------------------------------------------------|--------------------------------------------------------------------------------------------------------------------------------------------------------------------------------------------------------------------------------------------------------------------------------------------------------------------------------------------------------------------------------------------------------------------------------------------------------------------------------------------------------------------------------------------------------------------------------------------------------------------------------------------------------------------------------------------------------------------------------------------------------------------------------------------------------------------------------------------------------------------------------------------------------------------------------------------------------------------------------------------------------------------------------------------------------------------------------------------------------------------------------------------------------------------------------------------------------------------------------------------------------------------------------------------------------------------------------------------------------------------------------------------------------------------------------------------------------------------------------------------------------------------------------------------------------------------------------------------------------------------------------------------------------------------------------------------------------------------------------------------------------------------------------------------------------------------------------------------------------------------------------------------------------------------------------------------------------------------------------------------------------------------------------------------------------------------------------------------------------------------------------------------------------------------------------------------------------------------------------------------------------------------------------------------------------------------------------------------------------------------------------------------------------------------------------------------------------------------------------------------------------------------------------------------------------------------------------------------------------------------------------------------------------------------------------------------------------------------------------------------------------------------------------------------------------------------------------------------------------------------------------------------------------------------------------------------------------------------------------------------------------------------------------------------------------------------------------------------------------------------------------------------------------------------------------------------------------------------------------------------------------------------------------------------------------------------------------------------------------------------------------------------------------------------------------------------------------------------------------------------------------------------------------------------------------------------------------------------------------------------------------------------------------------------------------------------------------------------------------------------------------------------------------------------------------------------------------------------------------------------------------------------------------------------------------------------------------------------------------------------------------------------------------------------------------------------------------------------------------------------------------------------------------------------------------------------------------------------------------------------------------------------------------------------------------------------------------------------------------------------------------------------------------------------------------------------------------|-----------------------------------------|-------------------------------------------------------------------|--------|-------|-----------------------------------------------------------------------------------------------|-----------------------------------------------------------------------------------------------------------------|---------------------------------------------------------------------------------------------------------|---------------------------------------------------------------------------------------------------------------------------------------------------|----------------------|-----------------------------------------|--------------------|---------------------------------------------------------------------------------------------------------------------------------------------------|-----|----|-----------------------------------------------------------------------------------------------------------|---------------------|-----|-----------------------------------------------|------------|-----|-------|-----------------------|--------------------------------|---------------------------------------------------------------------------------------------------------------------------------------------------|-------------------------------------------------------------------|-----|-------|---|-----|------------------|---------------------------------------------------------------------------------------------------------------------------------------------------|-----------------------------|-----------------------------------------------------------------------------------|--------------|-----|-------|---|-----|---|-----------------------------------------------------------------------------------------------|---------------------------|-------|-------|------------------------|---|----------------------|-------------------------------------------------|--------------------|-------|------------------------------------------------|-----|---|-----|---|---------------------------------------------------------------------------------------------------------|---|---|-----|---|---|-----|--|--|-------------------|-------------------------|-------------------------------|------------|--|--------|--|-------------|--------------|-----|--------|-------|-------------------------|----------------------------------------------|-----|----|--|--|----------------------------|--------------------------------------------------------|-----|----|--|--|--------------------------------------------|--|--|--|--|--|--|----|-----------------------------------------------------------------------------------------------------------------|-------------------|---------------|------------|--|--|--------|--|-------------|---------|-------|-----|--------|-------|-----------------------------------------------------------------------------------------------------------------------------------------------------------------------------------------------------------------------------------------------------------------------------------------------------------------------------------------------------------------------------------------------------------------------------------------------------------------------------------------------------------------------------------------------------------------------------------------------------------------------------------------------------------------------------------------------------------------------------------------------------------------------------------------------------------------------------------------------------------------------------------------------------------------------------------------------------------------------------------------------------------------------------------------------------------------------------------------------------------------------------------------------------------------------------------------------------------------------------------------------------------------------------------------------------------------------------------------------------------------------------------------|--|--|--|--|--|--|-----------------------|----------|----------------------|-----|-------|---|-----|---|-----------------------------------------------------------------------------------------------------------|---------------------|-----|-------|------------|-----|-------|-----------------------|--------------------------------|---|-------|---|--|--|--|------------------|-----|-------|-----------------|--------------|---|-------|---|-----|---|-----------------------------------------------------------------------------------------------|---------------------------|---|-------|------------------------|---|-------|---------------------------------|---|-------|------------------------------------------------|--|--|--|--|--|--|
|                                                |                                                                                     | Default                                                                                                                                                                                                                                                                                                                                                                                                                                                                                                                                                                                                                                                                                                                                                                                                                                                                                                                                                                                                                                                                                                                                                                                                                                                                                                                                                                                                                                                                                                                                                                                                                                                                                                                                                                                                                                                                                                                                                                                                                                                                                                                                                                                                                                                                                                                                                                                                                                                                                                                                                                                                                                                                                                                                                                                                                                                                                                                                                                                                                                                                                                                                                                                                                                                                                                                                                                                                                                                                                                                                                                                                                                                                                                                                                                                                                                                                                                                                                                                                                                                                                                                                                                                                                                                                                                                                                                                                                                                | Range                                   | Max                                                               | Points | Tally |                                                                                               |                                                                                                                 |                                                                                                         |                                                                                                                                                   |                      |                                         |                    |                                                                                                                                                   |     |    |                                                                                                           |                     |     |                                               |            |     |       |                       |                                |                                                                                                                                                   |                                                                   |     |       |   |     |                  |                                                                                                                                                   |                             |                                                                                   |              |     |       |   |     |   |                                                                                               |                           |       |       |                        |   |                      |                                                 |                    |       |                                                |     |   |     |   |                                                                                                         |   |   |     |   |   |     |  |  |                   |                         |                               |            |  |        |  |             |              |     |        |       |                         |                                              |     |    |  |  |                            |                                                        |     |    |  |  |                                            |  |  |  |  |  |  |    |                                                                                                                 |                   |               |            |  |  |        |  |             |         |       |     |        |       |                                                                                                                                                                                                                                                                                                                                                                                                                                                                                                                                                                                                                                                                                                                                                                                                                                                                                                                                                                                                                                                                                                                                                                                                                                                                                                                                                                                         |  |  |  |  |  |  |                       |          |                      |     |       |   |     |   |                                                                                                           |                     |     |       |            |     |       |                       |                                |   |       |   |  |  |  |                  |     |       |                 |              |   |       |   |     |   |                                                                                               |                           |   |       |                        |   |       |                                 |   |       |                                                |  |  |  |  |  |  |
|                                                |                                                                                     | <table border="1"> <tr> <td rowspan="3">Genetic Evidence</td> <td rowspan="3">Case-Level Data</td> <td rowspan="3">Variant Evidence</td> <td rowspan="3">Autosomal Dominant or X-linked Disorder</td> <td>Variant is de novo</td> <td>2</td> <td>0-3</td> <td>12</td> <td></td> <td></td> <td></td> </tr> <tr> <td>Proband with predicted or proven null variant</td> <td>1.5</td> <td>0-2</td> <td>10</td> <td>5.0</td> <td>5</td> <td>van de Laar IM et al. 2011 Feb (21217753); Regalado ES et al. 2011 Sep 2 (21778426); van de Laar IM et al. 2012 Jan (22167769)<sup>109-111</sup></td> </tr> <tr> <td>Proband with other variant type with some evidence of gene impact</td> <td>0.5</td> <td>0-1.5</td> <td>7</td> <td>4.0</td> <td>4</td> <td>van de Laar IM et al. 2011 Feb (21217753); Regalado ES et al. 2011 Sep 2 (21778426); van de Laar IM et al. 2012 Jan (22167769)<sup>109-111</sup></td> </tr> <tr> <td rowspan="2">Autosomal Recessive Disease</td> <td>Two variants in trans and at least one de novo or a predicted/proven null variant</td> <td>2</td> <td>0-3</td> <td rowspan="2">12</td> <td></td> <td></td> <td></td> </tr> <tr> <td>Two variants (not predicted/proven null) with some evidence of gene impact in trans</td> <td>1</td> <td>0-1.5</td> <td></td> <td></td> <td></td> </tr> <tr> <td rowspan="5">Segregation Evidence</td> <td rowspan="5">Evidence of segregation in one or more families</td> <td rowspan="5">LOD Score Examples</td> <td>3</td> <td>5</td> <td rowspan="5">0-7</td> <td rowspan="5">7</td> <td rowspan="5">7.0</td> <td rowspan="5">7</td> <td rowspan="5">van de Laar IM et al. 2011 Feb (21217753); Regalado ES et al. 2011 Sep 2 (21778426)<sup>109; 110</sup></td> </tr> <tr> <td>2</td> <td>4</td> </tr> <tr> <td>1.5</td> <td>3</td> </tr> <tr> <td>1</td> <td>1.5</td> </tr> <tr> <td></td> <td></td> </tr> <tr> <td rowspan="3">Case-Control Data</td> <td rowspan="3">Case-Control Study Type</td> <td rowspan="3">Case-Control Quality Criteria</td> <td colspan="2">Guidelines</td> <td colspan="2">Scores</td> <td rowspan="3">PMIDs/Notes</td> </tr> <tr> <td>Points/Study</td> <td>Max</td> <td>Points</td> <td>Tally</td> </tr> <tr> <td>Single Variant Analysis</td> <td>1. Variant Detection Methodology<br/>2. Power</td> <td>0-6</td> <td>12</td> <td></td> <td></td> </tr> <tr> <td>Aggregate Variant Analysis</td> <td>3. Bias and confounding<br/>4. Statistical Significance</td> <td>0-6</td> <td>12</td> <td></td> <td></td> </tr> <tr> <td colspan="7">Total Genetic Evidence Points (Maximum 12)</td> <td>17</td> <td>Additional genetic evidence is available, but not curated due to achievement of maximum genetic evidence score.</td> </tr> <tr> <th rowspan="3">Evidence Category</th> <th rowspan="3">Evidence Type</th> <th colspan="3">Guidelines</th> <th colspan="2">Scores</th> <th rowspan="3">PMIDs/Notes</th> </tr> <tr> <th>Default</th> <th>Range</th> <th>Max</th> <th>Points</th> <th>Tally</th> </tr> <tr> <td colspan="7"> <table border="1"> <tr> <td rowspan="3">Experimental Evidence</td> <td rowspan="3">Function</td> <td>Biochemical Function</td> <td>0.5</td> <td>0 - 2</td> <td rowspan="3">2</td> <td rowspan="3">1.0</td> <td rowspan="3">1</td> <td rowspan="3">Verrecchia F et al. 2007 Jun 14 (17589920); van de Laar IM et al. 2011 Feb (21217753)<sup>109; 112</sup></td> </tr> <tr> <td>Protein Interaction</td> <td>0.5</td> <td>0 - 2</td> </tr> <tr> <td>Expression</td> <td>0.5</td> <td>0 - 2</td> </tr> <tr> <td rowspan="2">Functional Alteration</td> <td>Cells from affected individual</td> <td>1</td> <td>0 - 2</td> <td rowspan="2">2</td> <td></td> <td></td> <td></td> </tr> <tr> <td>Engineered cells</td> <td>0.5</td> <td>0 - 1</td> </tr> <tr> <td rowspan="4">Models &amp; Rescue</td> <td>Animal model</td> <td>2</td> <td>0 - 4</td> <td rowspan="4">4</td> <td rowspan="4">4.0</td> <td rowspan="4">4</td> <td rowspan="4">Yang X et al. 2001 Apr 2 (11285272); Tan CK et al. 2013 Jun 19 (23782924)<sup>113; 114</sup></td> </tr> <tr> <td>Cell culture model system</td> <td>1</td> <td>0 - 2</td> </tr> <tr> <td>Rescue in animal model</td> <td>2</td> <td>0 - 4</td> </tr> <tr> <td>Rescue in engineered equivalent</td> <td>1</td> <td>0 - 2</td> </tr> <tr> <td colspan="7">Total Experimental Evidence Points (Maximum 6)</td> <td>5</td> <td></td> </tr> </table> </td> </tr> </table> |                                         |                                                                   |        |       |                                                                                               |                                                                                                                 | Genetic Evidence                                                                                        | Case-Level Data                                                                                                                                   | Variant Evidence     | Autosomal Dominant or X-linked Disorder | Variant is de novo | 2                                                                                                                                                 | 0-3 | 12 |                                                                                                           |                     |     | Proband with predicted or proven null variant | 1.5        | 0-2 | 10    | 5.0                   | 5                              | van de Laar IM et al. 2011 Feb (21217753); Regalado ES et al. 2011 Sep 2 (21778426); van de Laar IM et al. 2012 Jan (22167769) <sup>109-111</sup> | Proband with other variant type with some evidence of gene impact | 0.5 | 0-1.5 | 7 | 4.0 | 4                | van de Laar IM et al. 2011 Feb (21217753); Regalado ES et al. 2011 Sep 2 (21778426); van de Laar IM et al. 2012 Jan (22167769) <sup>109-111</sup> | Autosomal Recessive Disease | Two variants in trans and at least one de novo or a predicted/proven null variant | 2            | 0-3 | 12    |   |     |   | Two variants (not predicted/proven null) with some evidence of gene impact in trans           | 1                         | 0-1.5 |       |                        |   | Segregation Evidence | Evidence of segregation in one or more families | LOD Score Examples | 3     | 5                                              | 0-7 | 7 | 7.0 | 7 | van de Laar IM et al. 2011 Feb (21217753); Regalado ES et al. 2011 Sep 2 (21778426) <sup>109; 110</sup> | 2 | 4 | 1.5 | 3 | 1 | 1.5 |  |  | Case-Control Data | Case-Control Study Type | Case-Control Quality Criteria | Guidelines |  | Scores |  | PMIDs/Notes | Points/Study | Max | Points | Tally | Single Variant Analysis | 1. Variant Detection Methodology<br>2. Power | 0-6 | 12 |  |  | Aggregate Variant Analysis | 3. Bias and confounding<br>4. Statistical Significance | 0-6 | 12 |  |  | Total Genetic Evidence Points (Maximum 12) |  |  |  |  |  |  | 17 | Additional genetic evidence is available, but not curated due to achievement of maximum genetic evidence score. | Evidence Category | Evidence Type | Guidelines |  |  | Scores |  | PMIDs/Notes | Default | Range | Max | Points | Tally | <table border="1"> <tr> <td rowspan="3">Experimental Evidence</td> <td rowspan="3">Function</td> <td>Biochemical Function</td> <td>0.5</td> <td>0 - 2</td> <td rowspan="3">2</td> <td rowspan="3">1.0</td> <td rowspan="3">1</td> <td rowspan="3">Verrecchia F et al. 2007 Jun 14 (17589920); van de Laar IM et al. 2011 Feb (21217753)<sup>109; 112</sup></td> </tr> <tr> <td>Protein Interaction</td> <td>0.5</td> <td>0 - 2</td> </tr> <tr> <td>Expression</td> <td>0.5</td> <td>0 - 2</td> </tr> <tr> <td rowspan="2">Functional Alteration</td> <td>Cells from affected individual</td> <td>1</td> <td>0 - 2</td> <td rowspan="2">2</td> <td></td> <td></td> <td></td> </tr> <tr> <td>Engineered cells</td> <td>0.5</td> <td>0 - 1</td> </tr> <tr> <td rowspan="4">Models &amp; Rescue</td> <td>Animal model</td> <td>2</td> <td>0 - 4</td> <td rowspan="4">4</td> <td rowspan="4">4.0</td> <td rowspan="4">4</td> <td rowspan="4">Yang X et al. 2001 Apr 2 (11285272); Tan CK et al. 2013 Jun 19 (23782924)<sup>113; 114</sup></td> </tr> <tr> <td>Cell culture model system</td> <td>1</td> <td>0 - 2</td> </tr> <tr> <td>Rescue in animal model</td> <td>2</td> <td>0 - 4</td> </tr> <tr> <td>Rescue in engineered equivalent</td> <td>1</td> <td>0 - 2</td> </tr> <tr> <td colspan="7">Total Experimental Evidence Points (Maximum 6)</td> <td>5</td> <td></td> </tr> </table> |  |  |  |  |  |  | Experimental Evidence | Function | Biochemical Function | 0.5 | 0 - 2 | 2 | 1.0 | 1 | Verrecchia F et al. 2007 Jun 14 (17589920); van de Laar IM et al. 2011 Feb (21217753) <sup>109; 112</sup> | Protein Interaction | 0.5 | 0 - 2 | Expression | 0.5 | 0 - 2 | Functional Alteration | Cells from affected individual | 1 | 0 - 2 | 2 |  |  |  | Engineered cells | 0.5 | 0 - 1 | Models & Rescue | Animal model | 2 | 0 - 4 | 4 | 4.0 | 4 | Yang X et al. 2001 Apr 2 (11285272); Tan CK et al. 2013 Jun 19 (23782924) <sup>113; 114</sup> | Cell culture model system | 1 | 0 - 2 | Rescue in animal model | 2 | 0 - 4 | Rescue in engineered equivalent | 1 | 0 - 2 | Total Experimental Evidence Points (Maximum 6) |  |  |  |  |  |  |
| Genetic Evidence                               | Case-Level Data                                                                     | Variant Evidence                                                                                                                                                                                                                                                                                                                                                                                                                                                                                                                                                                                                                                                                                                                                                                                                                                                                                                                                                                                                                                                                                                                                                                                                                                                                                                                                                                                                                                                                                                                                                                                                                                                                                                                                                                                                                                                                                                                                                                                                                                                                                                                                                                                                                                                                                                                                                                                                                                                                                                                                                                                                                                                                                                                                                                                                                                                                                                                                                                                                                                                                                                                                                                                                                                                                                                                                                                                                                                                                                                                                                                                                                                                                                                                                                                                                                                                                                                                                                                                                                                                                                                                                                                                                                                                                                                                                                                                                                                       | Autosomal Dominant or X-linked Disorder | Variant is de novo                                                | 2      | 0-3   | 12                                                                                            |                                                                                                                 |                                                                                                         |                                                                                                                                                   |                      |                                         |                    |                                                                                                                                                   |     |    |                                                                                                           |                     |     |                                               |            |     |       |                       |                                |                                                                                                                                                   |                                                                   |     |       |   |     |                  |                                                                                                                                                   |                             |                                                                                   |              |     |       |   |     |   |                                                                                               |                           |       |       |                        |   |                      |                                                 |                    |       |                                                |     |   |     |   |                                                                                                         |   |   |     |   |   |     |  |  |                   |                         |                               |            |  |        |  |             |              |     |        |       |                         |                                              |     |    |  |  |                            |                                                        |     |    |  |  |                                            |  |  |  |  |  |  |    |                                                                                                                 |                   |               |            |  |  |        |  |             |         |       |     |        |       |                                                                                                                                                                                                                                                                                                                                                                                                                                                                                                                                                                                                                                                                                                                                                                                                                                                                                                                                                                                                                                                                                                                                                                                                                                                                                                                                                                                         |  |  |  |  |  |  |                       |          |                      |     |       |   |     |   |                                                                                                           |                     |     |       |            |     |       |                       |                                |   |       |   |  |  |  |                  |     |       |                 |              |   |       |   |     |   |                                                                                               |                           |   |       |                        |   |       |                                 |   |       |                                                |  |  |  |  |  |  |
|                                                |                                                                                     |                                                                                                                                                                                                                                                                                                                                                                                                                                                                                                                                                                                                                                                                                                                                                                                                                                                                                                                                                                                                                                                                                                                                                                                                                                                                                                                                                                                                                                                                                                                                                                                                                                                                                                                                                                                                                                                                                                                                                                                                                                                                                                                                                                                                                                                                                                                                                                                                                                                                                                                                                                                                                                                                                                                                                                                                                                                                                                                                                                                                                                                                                                                                                                                                                                                                                                                                                                                                                                                                                                                                                                                                                                                                                                                                                                                                                                                                                                                                                                                                                                                                                                                                                                                                                                                                                                                                                                                                                                                        |                                         | Proband with predicted or proven null variant                     | 1.5    | 0-2   | 10                                                                                            | 5.0                                                                                                             |                                                                                                         |                                                                                                                                                   |                      |                                         | 5                  | van de Laar IM et al. 2011 Feb (21217753); Regalado ES et al. 2011 Sep 2 (21778426); van de Laar IM et al. 2012 Jan (22167769) <sup>109-111</sup> |     |    |                                                                                                           |                     |     |                                               |            |     |       |                       |                                |                                                                                                                                                   |                                                                   |     |       |   |     |                  |                                                                                                                                                   |                             |                                                                                   |              |     |       |   |     |   |                                                                                               |                           |       |       |                        |   |                      |                                                 |                    |       |                                                |     |   |     |   |                                                                                                         |   |   |     |   |   |     |  |  |                   |                         |                               |            |  |        |  |             |              |     |        |       |                         |                                              |     |    |  |  |                            |                                                        |     |    |  |  |                                            |  |  |  |  |  |  |    |                                                                                                                 |                   |               |            |  |  |        |  |             |         |       |     |        |       |                                                                                                                                                                                                                                                                                                                                                                                                                                                                                                                                                                                                                                                                                                                                                                                                                                                                                                                                                                                                                                                                                                                                                                                                                                                                                                                                                                                         |  |  |  |  |  |  |                       |          |                      |     |       |   |     |   |                                                                                                           |                     |     |       |            |     |       |                       |                                |   |       |   |  |  |  |                  |     |       |                 |              |   |       |   |     |   |                                                                                               |                           |   |       |                        |   |       |                                 |   |       |                                                |  |  |  |  |  |  |
|                                                |                                                                                     |                                                                                                                                                                                                                                                                                                                                                                                                                                                                                                                                                                                                                                                                                                                                                                                                                                                                                                                                                                                                                                                                                                                                                                                                                                                                                                                                                                                                                                                                                                                                                                                                                                                                                                                                                                                                                                                                                                                                                                                                                                                                                                                                                                                                                                                                                                                                                                                                                                                                                                                                                                                                                                                                                                                                                                                                                                                                                                                                                                                                                                                                                                                                                                                                                                                                                                                                                                                                                                                                                                                                                                                                                                                                                                                                                                                                                                                                                                                                                                                                                                                                                                                                                                                                                                                                                                                                                                                                                                                        |                                         | Proband with other variant type with some evidence of gene impact | 0.5    | 0-1.5 | 7                                                                                             | 4.0                                                                                                             | 4                                                                                                       | van de Laar IM et al. 2011 Feb (21217753); Regalado ES et al. 2011 Sep 2 (21778426); van de Laar IM et al. 2012 Jan (22167769) <sup>109-111</sup> |                      |                                         |                    |                                                                                                                                                   |     |    |                                                                                                           |                     |     |                                               |            |     |       |                       |                                |                                                                                                                                                   |                                                                   |     |       |   |     |                  |                                                                                                                                                   |                             |                                                                                   |              |     |       |   |     |   |                                                                                               |                           |       |       |                        |   |                      |                                                 |                    |       |                                                |     |   |     |   |                                                                                                         |   |   |     |   |   |     |  |  |                   |                         |                               |            |  |        |  |             |              |     |        |       |                         |                                              |     |    |  |  |                            |                                                        |     |    |  |  |                                            |  |  |  |  |  |  |    |                                                                                                                 |                   |               |            |  |  |        |  |             |         |       |     |        |       |                                                                                                                                                                                                                                                                                                                                                                                                                                                                                                                                                                                                                                                                                                                                                                                                                                                                                                                                                                                                                                                                                                                                                                                                                                                                                                                                                                                         |  |  |  |  |  |  |                       |          |                      |     |       |   |     |   |                                                                                                           |                     |     |       |            |     |       |                       |                                |   |       |   |  |  |  |                  |     |       |                 |              |   |       |   |     |   |                                                                                               |                           |   |       |                        |   |       |                                 |   |       |                                                |  |  |  |  |  |  |
| Autosomal Recessive Disease                    | Two variants in trans and at least one de novo or a predicted/proven null variant   | 2                                                                                                                                                                                                                                                                                                                                                                                                                                                                                                                                                                                                                                                                                                                                                                                                                                                                                                                                                                                                                                                                                                                                                                                                                                                                                                                                                                                                                                                                                                                                                                                                                                                                                                                                                                                                                                                                                                                                                                                                                                                                                                                                                                                                                                                                                                                                                                                                                                                                                                                                                                                                                                                                                                                                                                                                                                                                                                                                                                                                                                                                                                                                                                                                                                                                                                                                                                                                                                                                                                                                                                                                                                                                                                                                                                                                                                                                                                                                                                                                                                                                                                                                                                                                                                                                                                                                                                                                                                                      | 0-3                                     | 12                                                                |        |       |                                                                                               |                                                                                                                 |                                                                                                         |                                                                                                                                                   |                      |                                         |                    |                                                                                                                                                   |     |    |                                                                                                           |                     |     |                                               |            |     |       |                       |                                |                                                                                                                                                   |                                                                   |     |       |   |     |                  |                                                                                                                                                   |                             |                                                                                   |              |     |       |   |     |   |                                                                                               |                           |       |       |                        |   |                      |                                                 |                    |       |                                                |     |   |     |   |                                                                                                         |   |   |     |   |   |     |  |  |                   |                         |                               |            |  |        |  |             |              |     |        |       |                         |                                              |     |    |  |  |                            |                                                        |     |    |  |  |                                            |  |  |  |  |  |  |    |                                                                                                                 |                   |               |            |  |  |        |  |             |         |       |     |        |       |                                                                                                                                                                                                                                                                                                                                                                                                                                                                                                                                                                                                                                                                                                                                                                                                                                                                                                                                                                                                                                                                                                                                                                                                                                                                                                                                                                                         |  |  |  |  |  |  |                       |          |                      |     |       |   |     |   |                                                                                                           |                     |     |       |            |     |       |                       |                                |   |       |   |  |  |  |                  |     |       |                 |              |   |       |   |     |   |                                                                                               |                           |   |       |                        |   |       |                                 |   |       |                                                |  |  |  |  |  |  |
|                                                | Two variants (not predicted/proven null) with some evidence of gene impact in trans | 1                                                                                                                                                                                                                                                                                                                                                                                                                                                                                                                                                                                                                                                                                                                                                                                                                                                                                                                                                                                                                                                                                                                                                                                                                                                                                                                                                                                                                                                                                                                                                                                                                                                                                                                                                                                                                                                                                                                                                                                                                                                                                                                                                                                                                                                                                                                                                                                                                                                                                                                                                                                                                                                                                                                                                                                                                                                                                                                                                                                                                                                                                                                                                                                                                                                                                                                                                                                                                                                                                                                                                                                                                                                                                                                                                                                                                                                                                                                                                                                                                                                                                                                                                                                                                                                                                                                                                                                                                                                      | 0-1.5                                   |                                                                   |        |       |                                                                                               |                                                                                                                 |                                                                                                         |                                                                                                                                                   |                      |                                         |                    |                                                                                                                                                   |     |    |                                                                                                           |                     |     |                                               |            |     |       |                       |                                |                                                                                                                                                   |                                                                   |     |       |   |     |                  |                                                                                                                                                   |                             |                                                                                   |              |     |       |   |     |   |                                                                                               |                           |       |       |                        |   |                      |                                                 |                    |       |                                                |     |   |     |   |                                                                                                         |   |   |     |   |   |     |  |  |                   |                         |                               |            |  |        |  |             |              |     |        |       |                         |                                              |     |    |  |  |                            |                                                        |     |    |  |  |                                            |  |  |  |  |  |  |    |                                                                                                                 |                   |               |            |  |  |        |  |             |         |       |     |        |       |                                                                                                                                                                                                                                                                                                                                                                                                                                                                                                                                                                                                                                                                                                                                                                                                                                                                                                                                                                                                                                                                                                                                                                                                                                                                                                                                                                                         |  |  |  |  |  |  |                       |          |                      |     |       |   |     |   |                                                                                                           |                     |     |       |            |     |       |                       |                                |   |       |   |  |  |  |                  |     |       |                 |              |   |       |   |     |   |                                                                                               |                           |   |       |                        |   |       |                                 |   |       |                                                |  |  |  |  |  |  |
| Segregation Evidence                           | Evidence of segregation in one or more families                                     | LOD Score Examples                                                                                                                                                                                                                                                                                                                                                                                                                                                                                                                                                                                                                                                                                                                                                                                                                                                                                                                                                                                                                                                                                                                                                                                                                                                                                                                                                                                                                                                                                                                                                                                                                                                                                                                                                                                                                                                                                                                                                                                                                                                                                                                                                                                                                                                                                                                                                                                                                                                                                                                                                                                                                                                                                                                                                                                                                                                                                                                                                                                                                                                                                                                                                                                                                                                                                                                                                                                                                                                                                                                                                                                                                                                                                                                                                                                                                                                                                                                                                                                                                                                                                                                                                                                                                                                                                                                                                                                                                                     | 3                                       | 5                                                                 | 0-7    | 7     | 7.0                                                                                           | 7                                                                                                               | van de Laar IM et al. 2011 Feb (21217753); Regalado ES et al. 2011 Sep 2 (21778426) <sup>109; 110</sup> |                                                                                                                                                   |                      |                                         |                    |                                                                                                                                                   |     |    |                                                                                                           |                     |     |                                               |            |     |       |                       |                                |                                                                                                                                                   |                                                                   |     |       |   |     |                  |                                                                                                                                                   |                             |                                                                                   |              |     |       |   |     |   |                                                                                               |                           |       |       |                        |   |                      |                                                 |                    |       |                                                |     |   |     |   |                                                                                                         |   |   |     |   |   |     |  |  |                   |                         |                               |            |  |        |  |             |              |     |        |       |                         |                                              |     |    |  |  |                            |                                                        |     |    |  |  |                                            |  |  |  |  |  |  |    |                                                                                                                 |                   |               |            |  |  |        |  |             |         |       |     |        |       |                                                                                                                                                                                                                                                                                                                                                                                                                                                                                                                                                                                                                                                                                                                                                                                                                                                                                                                                                                                                                                                                                                                                                                                                                                                                                                                                                                                         |  |  |  |  |  |  |                       |          |                      |     |       |   |     |   |                                                                                                           |                     |     |       |            |     |       |                       |                                |   |       |   |  |  |  |                  |     |       |                 |              |   |       |   |     |   |                                                                                               |                           |   |       |                        |   |       |                                 |   |       |                                                |  |  |  |  |  |  |
|                                                |                                                                                     |                                                                                                                                                                                                                                                                                                                                                                                                                                                                                                                                                                                                                                                                                                                                                                                                                                                                                                                                                                                                                                                                                                                                                                                                                                                                                                                                                                                                                                                                                                                                                                                                                                                                                                                                                                                                                                                                                                                                                                                                                                                                                                                                                                                                                                                                                                                                                                                                                                                                                                                                                                                                                                                                                                                                                                                                                                                                                                                                                                                                                                                                                                                                                                                                                                                                                                                                                                                                                                                                                                                                                                                                                                                                                                                                                                                                                                                                                                                                                                                                                                                                                                                                                                                                                                                                                                                                                                                                                                                        | 2                                       | 4                                                                 |        |       |                                                                                               |                                                                                                                 |                                                                                                         |                                                                                                                                                   |                      |                                         |                    |                                                                                                                                                   |     |    |                                                                                                           |                     |     |                                               |            |     |       |                       |                                |                                                                                                                                                   |                                                                   |     |       |   |     |                  |                                                                                                                                                   |                             |                                                                                   |              |     |       |   |     |   |                                                                                               |                           |       |       |                        |   |                      |                                                 |                    |       |                                                |     |   |     |   |                                                                                                         |   |   |     |   |   |     |  |  |                   |                         |                               |            |  |        |  |             |              |     |        |       |                         |                                              |     |    |  |  |                            |                                                        |     |    |  |  |                                            |  |  |  |  |  |  |    |                                                                                                                 |                   |               |            |  |  |        |  |             |         |       |     |        |       |                                                                                                                                                                                                                                                                                                                                                                                                                                                                                                                                                                                                                                                                                                                                                                                                                                                                                                                                                                                                                                                                                                                                                                                                                                                                                                                                                                                         |  |  |  |  |  |  |                       |          |                      |     |       |   |     |   |                                                                                                           |                     |     |       |            |     |       |                       |                                |   |       |   |  |  |  |                  |     |       |                 |              |   |       |   |     |   |                                                                                               |                           |   |       |                        |   |       |                                 |   |       |                                                |  |  |  |  |  |  |
|                                                |                                                                                     |                                                                                                                                                                                                                                                                                                                                                                                                                                                                                                                                                                                                                                                                                                                                                                                                                                                                                                                                                                                                                                                                                                                                                                                                                                                                                                                                                                                                                                                                                                                                                                                                                                                                                                                                                                                                                                                                                                                                                                                                                                                                                                                                                                                                                                                                                                                                                                                                                                                                                                                                                                                                                                                                                                                                                                                                                                                                                                                                                                                                                                                                                                                                                                                                                                                                                                                                                                                                                                                                                                                                                                                                                                                                                                                                                                                                                                                                                                                                                                                                                                                                                                                                                                                                                                                                                                                                                                                                                                                        | 1.5                                     | 3                                                                 |        |       |                                                                                               |                                                                                                                 |                                                                                                         |                                                                                                                                                   |                      |                                         |                    |                                                                                                                                                   |     |    |                                                                                                           |                     |     |                                               |            |     |       |                       |                                |                                                                                                                                                   |                                                                   |     |       |   |     |                  |                                                                                                                                                   |                             |                                                                                   |              |     |       |   |     |   |                                                                                               |                           |       |       |                        |   |                      |                                                 |                    |       |                                                |     |   |     |   |                                                                                                         |   |   |     |   |   |     |  |  |                   |                         |                               |            |  |        |  |             |              |     |        |       |                         |                                              |     |    |  |  |                            |                                                        |     |    |  |  |                                            |  |  |  |  |  |  |    |                                                                                                                 |                   |               |            |  |  |        |  |             |         |       |     |        |       |                                                                                                                                                                                                                                                                                                                                                                                                                                                                                                                                                                                                                                                                                                                                                                                                                                                                                                                                                                                                                                                                                                                                                                                                                                                                                                                                                                                         |  |  |  |  |  |  |                       |          |                      |     |       |   |     |   |                                                                                                           |                     |     |       |            |     |       |                       |                                |   |       |   |  |  |  |                  |     |       |                 |              |   |       |   |     |   |                                                                                               |                           |   |       |                        |   |       |                                 |   |       |                                                |  |  |  |  |  |  |
|                                                |                                                                                     |                                                                                                                                                                                                                                                                                                                                                                                                                                                                                                                                                                                                                                                                                                                                                                                                                                                                                                                                                                                                                                                                                                                                                                                                                                                                                                                                                                                                                                                                                                                                                                                                                                                                                                                                                                                                                                                                                                                                                                                                                                                                                                                                                                                                                                                                                                                                                                                                                                                                                                                                                                                                                                                                                                                                                                                                                                                                                                                                                                                                                                                                                                                                                                                                                                                                                                                                                                                                                                                                                                                                                                                                                                                                                                                                                                                                                                                                                                                                                                                                                                                                                                                                                                                                                                                                                                                                                                                                                                                        | 1                                       | 1.5                                                               |        |       |                                                                                               |                                                                                                                 |                                                                                                         |                                                                                                                                                   |                      |                                         |                    |                                                                                                                                                   |     |    |                                                                                                           |                     |     |                                               |            |     |       |                       |                                |                                                                                                                                                   |                                                                   |     |       |   |     |                  |                                                                                                                                                   |                             |                                                                                   |              |     |       |   |     |   |                                                                                               |                           |       |       |                        |   |                      |                                                 |                    |       |                                                |     |   |     |   |                                                                                                         |   |   |     |   |   |     |  |  |                   |                         |                               |            |  |        |  |             |              |     |        |       |                         |                                              |     |    |  |  |                            |                                                        |     |    |  |  |                                            |  |  |  |  |  |  |    |                                                                                                                 |                   |               |            |  |  |        |  |             |         |       |     |        |       |                                                                                                                                                                                                                                                                                                                                                                                                                                                                                                                                                                                                                                                                                                                                                                                                                                                                                                                                                                                                                                                                                                                                                                                                                                                                                                                                                                                         |  |  |  |  |  |  |                       |          |                      |     |       |   |     |   |                                                                                                           |                     |     |       |            |     |       |                       |                                |   |       |   |  |  |  |                  |     |       |                 |              |   |       |   |     |   |                                                                                               |                           |   |       |                        |   |       |                                 |   |       |                                                |  |  |  |  |  |  |
|                                                |                                                                                     |                                                                                                                                                                                                                                                                                                                                                                                                                                                                                                                                                                                                                                                                                                                                                                                                                                                                                                                                                                                                                                                                                                                                                                                                                                                                                                                                                                                                                                                                                                                                                                                                                                                                                                                                                                                                                                                                                                                                                                                                                                                                                                                                                                                                                                                                                                                                                                                                                                                                                                                                                                                                                                                                                                                                                                                                                                                                                                                                                                                                                                                                                                                                                                                                                                                                                                                                                                                                                                                                                                                                                                                                                                                                                                                                                                                                                                                                                                                                                                                                                                                                                                                                                                                                                                                                                                                                                                                                                                                        |                                         |                                                                   |        |       |                                                                                               |                                                                                                                 |                                                                                                         |                                                                                                                                                   |                      |                                         |                    |                                                                                                                                                   |     |    |                                                                                                           |                     |     |                                               |            |     |       |                       |                                |                                                                                                                                                   |                                                                   |     |       |   |     |                  |                                                                                                                                                   |                             |                                                                                   |              |     |       |   |     |   |                                                                                               |                           |       |       |                        |   |                      |                                                 |                    |       |                                                |     |   |     |   |                                                                                                         |   |   |     |   |   |     |  |  |                   |                         |                               |            |  |        |  |             |              |     |        |       |                         |                                              |     |    |  |  |                            |                                                        |     |    |  |  |                                            |  |  |  |  |  |  |    |                                                                                                                 |                   |               |            |  |  |        |  |             |         |       |     |        |       |                                                                                                                                                                                                                                                                                                                                                                                                                                                                                                                                                                                                                                                                                                                                                                                                                                                                                                                                                                                                                                                                                                                                                                                                                                                                                                                                                                                         |  |  |  |  |  |  |                       |          |                      |     |       |   |     |   |                                                                                                           |                     |     |       |            |     |       |                       |                                |   |       |   |  |  |  |                  |     |       |                 |              |   |       |   |     |   |                                                                                               |                           |   |       |                        |   |       |                                 |   |       |                                                |  |  |  |  |  |  |
| Case-Control Data                              | Case-Control Study Type                                                             | Case-Control Quality Criteria                                                                                                                                                                                                                                                                                                                                                                                                                                                                                                                                                                                                                                                                                                                                                                                                                                                                                                                                                                                                                                                                                                                                                                                                                                                                                                                                                                                                                                                                                                                                                                                                                                                                                                                                                                                                                                                                                                                                                                                                                                                                                                                                                                                                                                                                                                                                                                                                                                                                                                                                                                                                                                                                                                                                                                                                                                                                                                                                                                                                                                                                                                                                                                                                                                                                                                                                                                                                                                                                                                                                                                                                                                                                                                                                                                                                                                                                                                                                                                                                                                                                                                                                                                                                                                                                                                                                                                                                                          | Guidelines                              |                                                                   | Scores |       | PMIDs/Notes                                                                                   |                                                                                                                 |                                                                                                         |                                                                                                                                                   |                      |                                         |                    |                                                                                                                                                   |     |    |                                                                                                           |                     |     |                                               |            |     |       |                       |                                |                                                                                                                                                   |                                                                   |     |       |   |     |                  |                                                                                                                                                   |                             |                                                                                   |              |     |       |   |     |   |                                                                                               |                           |       |       |                        |   |                      |                                                 |                    |       |                                                |     |   |     |   |                                                                                                         |   |   |     |   |   |     |  |  |                   |                         |                               |            |  |        |  |             |              |     |        |       |                         |                                              |     |    |  |  |                            |                                                        |     |    |  |  |                                            |  |  |  |  |  |  |    |                                                                                                                 |                   |               |            |  |  |        |  |             |         |       |     |        |       |                                                                                                                                                                                                                                                                                                                                                                                                                                                                                                                                                                                                                                                                                                                                                                                                                                                                                                                                                                                                                                                                                                                                                                                                                                                                                                                                                                                         |  |  |  |  |  |  |                       |          |                      |     |       |   |     |   |                                                                                                           |                     |     |       |            |     |       |                       |                                |   |       |   |  |  |  |                  |     |       |                 |              |   |       |   |     |   |                                                                                               |                           |   |       |                        |   |       |                                 |   |       |                                                |  |  |  |  |  |  |
|                                                |                                                                                     |                                                                                                                                                                                                                                                                                                                                                                                                                                                                                                                                                                                                                                                                                                                                                                                                                                                                                                                                                                                                                                                                                                                                                                                                                                                                                                                                                                                                                                                                                                                                                                                                                                                                                                                                                                                                                                                                                                                                                                                                                                                                                                                                                                                                                                                                                                                                                                                                                                                                                                                                                                                                                                                                                                                                                                                                                                                                                                                                                                                                                                                                                                                                                                                                                                                                                                                                                                                                                                                                                                                                                                                                                                                                                                                                                                                                                                                                                                                                                                                                                                                                                                                                                                                                                                                                                                                                                                                                                                                        | Points/Study                            | Max                                                               | Points | Tally |                                                                                               |                                                                                                                 |                                                                                                         |                                                                                                                                                   |                      |                                         |                    |                                                                                                                                                   |     |    |                                                                                                           |                     |     |                                               |            |     |       |                       |                                |                                                                                                                                                   |                                                                   |     |       |   |     |                  |                                                                                                                                                   |                             |                                                                                   |              |     |       |   |     |   |                                                                                               |                           |       |       |                        |   |                      |                                                 |                    |       |                                                |     |   |     |   |                                                                                                         |   |   |     |   |   |     |  |  |                   |                         |                               |            |  |        |  |             |              |     |        |       |                         |                                              |     |    |  |  |                            |                                                        |     |    |  |  |                                            |  |  |  |  |  |  |    |                                                                                                                 |                   |               |            |  |  |        |  |             |         |       |     |        |       |                                                                                                                                                                                                                                                                                                                                                                                                                                                                                                                                                                                                                                                                                                                                                                                                                                                                                                                                                                                                                                                                                                                                                                                                                                                                                                                                                                                         |  |  |  |  |  |  |                       |          |                      |     |       |   |     |   |                                                                                                           |                     |     |       |            |     |       |                       |                                |   |       |   |  |  |  |                  |     |       |                 |              |   |       |   |     |   |                                                                                               |                           |   |       |                        |   |       |                                 |   |       |                                                |  |  |  |  |  |  |
|                                                |                                                                                     |                                                                                                                                                                                                                                                                                                                                                                                                                                                                                                                                                                                                                                                                                                                                                                                                                                                                                                                                                                                                                                                                                                                                                                                                                                                                                                                                                                                                                                                                                                                                                                                                                                                                                                                                                                                                                                                                                                                                                                                                                                                                                                                                                                                                                                                                                                                                                                                                                                                                                                                                                                                                                                                                                                                                                                                                                                                                                                                                                                                                                                                                                                                                                                                                                                                                                                                                                                                                                                                                                                                                                                                                                                                                                                                                                                                                                                                                                                                                                                                                                                                                                                                                                                                                                                                                                                                                                                                                                                                        | Single Variant Analysis                 | 1. Variant Detection Methodology<br>2. Power                      | 0-6    | 12    |                                                                                               |                                                                                                                 |                                                                                                         |                                                                                                                                                   |                      |                                         |                    |                                                                                                                                                   |     |    |                                                                                                           |                     |     |                                               |            |     |       |                       |                                |                                                                                                                                                   |                                                                   |     |       |   |     |                  |                                                                                                                                                   |                             |                                                                                   |              |     |       |   |     |   |                                                                                               |                           |       |       |                        |   |                      |                                                 |                    |       |                                                |     |   |     |   |                                                                                                         |   |   |     |   |   |     |  |  |                   |                         |                               |            |  |        |  |             |              |     |        |       |                         |                                              |     |    |  |  |                            |                                                        |     |    |  |  |                                            |  |  |  |  |  |  |    |                                                                                                                 |                   |               |            |  |  |        |  |             |         |       |     |        |       |                                                                                                                                                                                                                                                                                                                                                                                                                                                                                                                                                                                                                                                                                                                                                                                                                                                                                                                                                                                                                                                                                                                                                                                                                                                                                                                                                                                         |  |  |  |  |  |  |                       |          |                      |     |       |   |     |   |                                                                                                           |                     |     |       |            |     |       |                       |                                |   |       |   |  |  |  |                  |     |       |                 |              |   |       |   |     |   |                                                                                               |                           |   |       |                        |   |       |                                 |   |       |                                                |  |  |  |  |  |  |
| Aggregate Variant Analysis                     | 3. Bias and confounding<br>4. Statistical Significance                              | 0-6                                                                                                                                                                                                                                                                                                                                                                                                                                                                                                                                                                                                                                                                                                                                                                                                                                                                                                                                                                                                                                                                                                                                                                                                                                                                                                                                                                                                                                                                                                                                                                                                                                                                                                                                                                                                                                                                                                                                                                                                                                                                                                                                                                                                                                                                                                                                                                                                                                                                                                                                                                                                                                                                                                                                                                                                                                                                                                                                                                                                                                                                                                                                                                                                                                                                                                                                                                                                                                                                                                                                                                                                                                                                                                                                                                                                                                                                                                                                                                                                                                                                                                                                                                                                                                                                                                                                                                                                                                                    | 12                                      |                                                                   |        |       |                                                                                               |                                                                                                                 |                                                                                                         |                                                                                                                                                   |                      |                                         |                    |                                                                                                                                                   |     |    |                                                                                                           |                     |     |                                               |            |     |       |                       |                                |                                                                                                                                                   |                                                                   |     |       |   |     |                  |                                                                                                                                                   |                             |                                                                                   |              |     |       |   |     |   |                                                                                               |                           |       |       |                        |   |                      |                                                 |                    |       |                                                |     |   |     |   |                                                                                                         |   |   |     |   |   |     |  |  |                   |                         |                               |            |  |        |  |             |              |     |        |       |                         |                                              |     |    |  |  |                            |                                                        |     |    |  |  |                                            |  |  |  |  |  |  |    |                                                                                                                 |                   |               |            |  |  |        |  |             |         |       |     |        |       |                                                                                                                                                                                                                                                                                                                                                                                                                                                                                                                                                                                                                                                                                                                                                                                                                                                                                                                                                                                                                                                                                                                                                                                                                                                                                                                                                                                         |  |  |  |  |  |  |                       |          |                      |     |       |   |     |   |                                                                                                           |                     |     |       |            |     |       |                       |                                |   |       |   |  |  |  |                  |     |       |                 |              |   |       |   |     |   |                                                                                               |                           |   |       |                        |   |       |                                 |   |       |                                                |  |  |  |  |  |  |
| Total Genetic Evidence Points (Maximum 12)     |                                                                                     |                                                                                                                                                                                                                                                                                                                                                                                                                                                                                                                                                                                                                                                                                                                                                                                                                                                                                                                                                                                                                                                                                                                                                                                                                                                                                                                                                                                                                                                                                                                                                                                                                                                                                                                                                                                                                                                                                                                                                                                                                                                                                                                                                                                                                                                                                                                                                                                                                                                                                                                                                                                                                                                                                                                                                                                                                                                                                                                                                                                                                                                                                                                                                                                                                                                                                                                                                                                                                                                                                                                                                                                                                                                                                                                                                                                                                                                                                                                                                                                                                                                                                                                                                                                                                                                                                                                                                                                                                                                        |                                         |                                                                   |        |       | 17                                                                                            | Additional genetic evidence is available, but not curated due to achievement of maximum genetic evidence score. |                                                                                                         |                                                                                                                                                   |                      |                                         |                    |                                                                                                                                                   |     |    |                                                                                                           |                     |     |                                               |            |     |       |                       |                                |                                                                                                                                                   |                                                                   |     |       |   |     |                  |                                                                                                                                                   |                             |                                                                                   |              |     |       |   |     |   |                                                                                               |                           |       |       |                        |   |                      |                                                 |                    |       |                                                |     |   |     |   |                                                                                                         |   |   |     |   |   |     |  |  |                   |                         |                               |            |  |        |  |             |              |     |        |       |                         |                                              |     |    |  |  |                            |                                                        |     |    |  |  |                                            |  |  |  |  |  |  |    |                                                                                                                 |                   |               |            |  |  |        |  |             |         |       |     |        |       |                                                                                                                                                                                                                                                                                                                                                                                                                                                                                                                                                                                                                                                                                                                                                                                                                                                                                                                                                                                                                                                                                                                                                                                                                                                                                                                                                                                         |  |  |  |  |  |  |                       |          |                      |     |       |   |     |   |                                                                                                           |                     |     |       |            |     |       |                       |                                |   |       |   |  |  |  |                  |     |       |                 |              |   |       |   |     |   |                                                                                               |                           |   |       |                        |   |       |                                 |   |       |                                                |  |  |  |  |  |  |
| Evidence Category                              | Evidence Type                                                                       | Guidelines                                                                                                                                                                                                                                                                                                                                                                                                                                                                                                                                                                                                                                                                                                                                                                                                                                                                                                                                                                                                                                                                                                                                                                                                                                                                                                                                                                                                                                                                                                                                                                                                                                                                                                                                                                                                                                                                                                                                                                                                                                                                                                                                                                                                                                                                                                                                                                                                                                                                                                                                                                                                                                                                                                                                                                                                                                                                                                                                                                                                                                                                                                                                                                                                                                                                                                                                                                                                                                                                                                                                                                                                                                                                                                                                                                                                                                                                                                                                                                                                                                                                                                                                                                                                                                                                                                                                                                                                                                             |                                         |                                                                   | Scores |       | PMIDs/Notes                                                                                   |                                                                                                                 |                                                                                                         |                                                                                                                                                   |                      |                                         |                    |                                                                                                                                                   |     |    |                                                                                                           |                     |     |                                               |            |     |       |                       |                                |                                                                                                                                                   |                                                                   |     |       |   |     |                  |                                                                                                                                                   |                             |                                                                                   |              |     |       |   |     |   |                                                                                               |                           |       |       |                        |   |                      |                                                 |                    |       |                                                |     |   |     |   |                                                                                                         |   |   |     |   |   |     |  |  |                   |                         |                               |            |  |        |  |             |              |     |        |       |                         |                                              |     |    |  |  |                            |                                                        |     |    |  |  |                                            |  |  |  |  |  |  |    |                                                                                                                 |                   |               |            |  |  |        |  |             |         |       |     |        |       |                                                                                                                                                                                                                                                                                                                                                                                                                                                                                                                                                                                                                                                                                                                                                                                                                                                                                                                                                                                                                                                                                                                                                                                                                                                                                                                                                                                         |  |  |  |  |  |  |                       |          |                      |     |       |   |     |   |                                                                                                           |                     |     |       |            |     |       |                       |                                |   |       |   |  |  |  |                  |     |       |                 |              |   |       |   |     |   |                                                                                               |                           |   |       |                        |   |       |                                 |   |       |                                                |  |  |  |  |  |  |
|                                                |                                                                                     | Default                                                                                                                                                                                                                                                                                                                                                                                                                                                                                                                                                                                                                                                                                                                                                                                                                                                                                                                                                                                                                                                                                                                                                                                                                                                                                                                                                                                                                                                                                                                                                                                                                                                                                                                                                                                                                                                                                                                                                                                                                                                                                                                                                                                                                                                                                                                                                                                                                                                                                                                                                                                                                                                                                                                                                                                                                                                                                                                                                                                                                                                                                                                                                                                                                                                                                                                                                                                                                                                                                                                                                                                                                                                                                                                                                                                                                                                                                                                                                                                                                                                                                                                                                                                                                                                                                                                                                                                                                                                | Range                                   | Max                                                               | Points | Tally |                                                                                               |                                                                                                                 |                                                                                                         |                                                                                                                                                   |                      |                                         |                    |                                                                                                                                                   |     |    |                                                                                                           |                     |     |                                               |            |     |       |                       |                                |                                                                                                                                                   |                                                                   |     |       |   |     |                  |                                                                                                                                                   |                             |                                                                                   |              |     |       |   |     |   |                                                                                               |                           |       |       |                        |   |                      |                                                 |                    |       |                                                |     |   |     |   |                                                                                                         |   |   |     |   |   |     |  |  |                   |                         |                               |            |  |        |  |             |              |     |        |       |                         |                                              |     |    |  |  |                            |                                                        |     |    |  |  |                                            |  |  |  |  |  |  |    |                                                                                                                 |                   |               |            |  |  |        |  |             |         |       |     |        |       |                                                                                                                                                                                                                                                                                                                                                                                                                                                                                                                                                                                                                                                                                                                                                                                                                                                                                                                                                                                                                                                                                                                                                                                                                                                                                                                                                                                         |  |  |  |  |  |  |                       |          |                      |     |       |   |     |   |                                                                                                           |                     |     |       |            |     |       |                       |                                |   |       |   |  |  |  |                  |     |       |                 |              |   |       |   |     |   |                                                                                               |                           |   |       |                        |   |       |                                 |   |       |                                                |  |  |  |  |  |  |
|                                                |                                                                                     | <table border="1"> <tr> <td rowspan="3">Experimental Evidence</td> <td rowspan="3">Function</td> <td>Biochemical Function</td> <td>0.5</td> <td>0 - 2</td> <td rowspan="3">2</td> <td rowspan="3">1.0</td> <td rowspan="3">1</td> <td rowspan="3">Verrecchia F et al. 2007 Jun 14 (17589920); van de Laar IM et al. 2011 Feb (21217753)<sup>109; 112</sup></td> </tr> <tr> <td>Protein Interaction</td> <td>0.5</td> <td>0 - 2</td> </tr> <tr> <td>Expression</td> <td>0.5</td> <td>0 - 2</td> </tr> <tr> <td rowspan="2">Functional Alteration</td> <td>Cells from affected individual</td> <td>1</td> <td>0 - 2</td> <td rowspan="2">2</td> <td></td> <td></td> <td></td> </tr> <tr> <td>Engineered cells</td> <td>0.5</td> <td>0 - 1</td> </tr> <tr> <td rowspan="4">Models &amp; Rescue</td> <td>Animal model</td> <td>2</td> <td>0 - 4</td> <td rowspan="4">4</td> <td rowspan="4">4.0</td> <td rowspan="4">4</td> <td rowspan="4">Yang X et al. 2001 Apr 2 (11285272); Tan CK et al. 2013 Jun 19 (23782924)<sup>113; 114</sup></td> </tr> <tr> <td>Cell culture model system</td> <td>1</td> <td>0 - 2</td> </tr> <tr> <td>Rescue in animal model</td> <td>2</td> <td>0 - 4</td> </tr> <tr> <td>Rescue in engineered equivalent</td> <td>1</td> <td>0 - 2</td> </tr> <tr> <td colspan="7">Total Experimental Evidence Points (Maximum 6)</td> <td>5</td> <td></td> </tr> </table>                                                                                                                                                                                                                                                                                                                                                                                                                                                                                                                                                                                                                                                                                                                                                                                                                                                                                                                                                                                                                                                                                                                                                                                                                                                                                                                                                                                                                                                                                                                                                                                                                                                                                                                                                                                                                                                                                                                                                                                                                                                                                                                                                                                                                                                                                                                                                                                                                                                                                                                                                                                                                                                                                                                                                                                                                                                                                                                                                                                                                                                                |                                         |                                                                   |        |       |                                                                                               |                                                                                                                 | Experimental Evidence                                                                                   | Function                                                                                                                                          | Biochemical Function | 0.5                                     | 0 - 2              | 2                                                                                                                                                 | 1.0 | 1  | Verrecchia F et al. 2007 Jun 14 (17589920); van de Laar IM et al. 2011 Feb (21217753) <sup>109; 112</sup> | Protein Interaction | 0.5 | 0 - 2                                         | Expression | 0.5 | 0 - 2 | Functional Alteration | Cells from affected individual | 1                                                                                                                                                 | 0 - 2                                                             | 2   |       |   |     | Engineered cells | 0.5                                                                                                                                               | 0 - 1                       | Models & Rescue                                                                   | Animal model | 2   | 0 - 4 | 4 | 4.0 | 4 | Yang X et al. 2001 Apr 2 (11285272); Tan CK et al. 2013 Jun 19 (23782924) <sup>113; 114</sup> | Cell culture model system | 1     | 0 - 2 | Rescue in animal model | 2 | 0 - 4                | Rescue in engineered equivalent                 | 1                  | 0 - 2 | Total Experimental Evidence Points (Maximum 6) |     |   |     |   |                                                                                                         |   | 5 |     |   |   |     |  |  |                   |                         |                               |            |  |        |  |             |              |     |        |       |                         |                                              |     |    |  |  |                            |                                                        |     |    |  |  |                                            |  |  |  |  |  |  |    |                                                                                                                 |                   |               |            |  |  |        |  |             |         |       |     |        |       |                                                                                                                                                                                                                                                                                                                                                                                                                                                                                                                                                                                                                                                                                                                                                                                                                                                                                                                                                                                                                                                                                                                                                                                                                                                                                                                                                                                         |  |  |  |  |  |  |                       |          |                      |     |       |   |     |   |                                                                                                           |                     |     |       |            |     |       |                       |                                |   |       |   |  |  |  |                  |     |       |                 |              |   |       |   |     |   |                                                                                               |                           |   |       |                        |   |       |                                 |   |       |                                                |  |  |  |  |  |  |
| Experimental Evidence                          | Function                                                                            | Biochemical Function                                                                                                                                                                                                                                                                                                                                                                                                                                                                                                                                                                                                                                                                                                                                                                                                                                                                                                                                                                                                                                                                                                                                                                                                                                                                                                                                                                                                                                                                                                                                                                                                                                                                                                                                                                                                                                                                                                                                                                                                                                                                                                                                                                                                                                                                                                                                                                                                                                                                                                                                                                                                                                                                                                                                                                                                                                                                                                                                                                                                                                                                                                                                                                                                                                                                                                                                                                                                                                                                                                                                                                                                                                                                                                                                                                                                                                                                                                                                                                                                                                                                                                                                                                                                                                                                                                                                                                                                                                   | 0.5                                     | 0 - 2                                                             | 2      | 1.0   | 1                                                                                             | Verrecchia F et al. 2007 Jun 14 (17589920); van de Laar IM et al. 2011 Feb (21217753) <sup>109; 112</sup>       |                                                                                                         |                                                                                                                                                   |                      |                                         |                    |                                                                                                                                                   |     |    |                                                                                                           |                     |     |                                               |            |     |       |                       |                                |                                                                                                                                                   |                                                                   |     |       |   |     |                  |                                                                                                                                                   |                             |                                                                                   |              |     |       |   |     |   |                                                                                               |                           |       |       |                        |   |                      |                                                 |                    |       |                                                |     |   |     |   |                                                                                                         |   |   |     |   |   |     |  |  |                   |                         |                               |            |  |        |  |             |              |     |        |       |                         |                                              |     |    |  |  |                            |                                                        |     |    |  |  |                                            |  |  |  |  |  |  |    |                                                                                                                 |                   |               |            |  |  |        |  |             |         |       |     |        |       |                                                                                                                                                                                                                                                                                                                                                                                                                                                                                                                                                                                                                                                                                                                                                                                                                                                                                                                                                                                                                                                                                                                                                                                                                                                                                                                                                                                         |  |  |  |  |  |  |                       |          |                      |     |       |   |     |   |                                                                                                           |                     |     |       |            |     |       |                       |                                |   |       |   |  |  |  |                  |     |       |                 |              |   |       |   |     |   |                                                                                               |                           |   |       |                        |   |       |                                 |   |       |                                                |  |  |  |  |  |  |
|                                                |                                                                                     | Protein Interaction                                                                                                                                                                                                                                                                                                                                                                                                                                                                                                                                                                                                                                                                                                                                                                                                                                                                                                                                                                                                                                                                                                                                                                                                                                                                                                                                                                                                                                                                                                                                                                                                                                                                                                                                                                                                                                                                                                                                                                                                                                                                                                                                                                                                                                                                                                                                                                                                                                                                                                                                                                                                                                                                                                                                                                                                                                                                                                                                                                                                                                                                                                                                                                                                                                                                                                                                                                                                                                                                                                                                                                                                                                                                                                                                                                                                                                                                                                                                                                                                                                                                                                                                                                                                                                                                                                                                                                                                                                    | 0.5                                     | 0 - 2                                                             |        |       |                                                                                               |                                                                                                                 |                                                                                                         |                                                                                                                                                   |                      |                                         |                    |                                                                                                                                                   |     |    |                                                                                                           |                     |     |                                               |            |     |       |                       |                                |                                                                                                                                                   |                                                                   |     |       |   |     |                  |                                                                                                                                                   |                             |                                                                                   |              |     |       |   |     |   |                                                                                               |                           |       |       |                        |   |                      |                                                 |                    |       |                                                |     |   |     |   |                                                                                                         |   |   |     |   |   |     |  |  |                   |                         |                               |            |  |        |  |             |              |     |        |       |                         |                                              |     |    |  |  |                            |                                                        |     |    |  |  |                                            |  |  |  |  |  |  |    |                                                                                                                 |                   |               |            |  |  |        |  |             |         |       |     |        |       |                                                                                                                                                                                                                                                                                                                                                                                                                                                                                                                                                                                                                                                                                                                                                                                                                                                                                                                                                                                                                                                                                                                                                                                                                                                                                                                                                                                         |  |  |  |  |  |  |                       |          |                      |     |       |   |     |   |                                                                                                           |                     |     |       |            |     |       |                       |                                |   |       |   |  |  |  |                  |     |       |                 |              |   |       |   |     |   |                                                                                               |                           |   |       |                        |   |       |                                 |   |       |                                                |  |  |  |  |  |  |
|                                                |                                                                                     | Expression                                                                                                                                                                                                                                                                                                                                                                                                                                                                                                                                                                                                                                                                                                                                                                                                                                                                                                                                                                                                                                                                                                                                                                                                                                                                                                                                                                                                                                                                                                                                                                                                                                                                                                                                                                                                                                                                                                                                                                                                                                                                                                                                                                                                                                                                                                                                                                                                                                                                                                                                                                                                                                                                                                                                                                                                                                                                                                                                                                                                                                                                                                                                                                                                                                                                                                                                                                                                                                                                                                                                                                                                                                                                                                                                                                                                                                                                                                                                                                                                                                                                                                                                                                                                                                                                                                                                                                                                                                             | 0.5                                     | 0 - 2                                                             |        |       |                                                                                               |                                                                                                                 |                                                                                                         |                                                                                                                                                   |                      |                                         |                    |                                                                                                                                                   |     |    |                                                                                                           |                     |     |                                               |            |     |       |                       |                                |                                                                                                                                                   |                                                                   |     |       |   |     |                  |                                                                                                                                                   |                             |                                                                                   |              |     |       |   |     |   |                                                                                               |                           |       |       |                        |   |                      |                                                 |                    |       |                                                |     |   |     |   |                                                                                                         |   |   |     |   |   |     |  |  |                   |                         |                               |            |  |        |  |             |              |     |        |       |                         |                                              |     |    |  |  |                            |                                                        |     |    |  |  |                                            |  |  |  |  |  |  |    |                                                                                                                 |                   |               |            |  |  |        |  |             |         |       |     |        |       |                                                                                                                                                                                                                                                                                                                                                                                                                                                                                                                                                                                                                                                                                                                                                                                                                                                                                                                                                                                                                                                                                                                                                                                                                                                                                                                                                                                         |  |  |  |  |  |  |                       |          |                      |     |       |   |     |   |                                                                                                           |                     |     |       |            |     |       |                       |                                |   |       |   |  |  |  |                  |     |       |                 |              |   |       |   |     |   |                                                                                               |                           |   |       |                        |   |       |                                 |   |       |                                                |  |  |  |  |  |  |
| Functional Alteration                          | Cells from affected individual                                                      | 1                                                                                                                                                                                                                                                                                                                                                                                                                                                                                                                                                                                                                                                                                                                                                                                                                                                                                                                                                                                                                                                                                                                                                                                                                                                                                                                                                                                                                                                                                                                                                                                                                                                                                                                                                                                                                                                                                                                                                                                                                                                                                                                                                                                                                                                                                                                                                                                                                                                                                                                                                                                                                                                                                                                                                                                                                                                                                                                                                                                                                                                                                                                                                                                                                                                                                                                                                                                                                                                                                                                                                                                                                                                                                                                                                                                                                                                                                                                                                                                                                                                                                                                                                                                                                                                                                                                                                                                                                                                      | 0 - 2                                   | 2                                                                 |        |       |                                                                                               |                                                                                                                 |                                                                                                         |                                                                                                                                                   |                      |                                         |                    |                                                                                                                                                   |     |    |                                                                                                           |                     |     |                                               |            |     |       |                       |                                |                                                                                                                                                   |                                                                   |     |       |   |     |                  |                                                                                                                                                   |                             |                                                                                   |              |     |       |   |     |   |                                                                                               |                           |       |       |                        |   |                      |                                                 |                    |       |                                                |     |   |     |   |                                                                                                         |   |   |     |   |   |     |  |  |                   |                         |                               |            |  |        |  |             |              |     |        |       |                         |                                              |     |    |  |  |                            |                                                        |     |    |  |  |                                            |  |  |  |  |  |  |    |                                                                                                                 |                   |               |            |  |  |        |  |             |         |       |     |        |       |                                                                                                                                                                                                                                                                                                                                                                                                                                                                                                                                                                                                                                                                                                                                                                                                                                                                                                                                                                                                                                                                                                                                                                                                                                                                                                                                                                                         |  |  |  |  |  |  |                       |          |                      |     |       |   |     |   |                                                                                                           |                     |     |       |            |     |       |                       |                                |   |       |   |  |  |  |                  |     |       |                 |              |   |       |   |     |   |                                                                                               |                           |   |       |                        |   |       |                                 |   |       |                                                |  |  |  |  |  |  |
|                                                | Engineered cells                                                                    | 0.5                                                                                                                                                                                                                                                                                                                                                                                                                                                                                                                                                                                                                                                                                                                                                                                                                                                                                                                                                                                                                                                                                                                                                                                                                                                                                                                                                                                                                                                                                                                                                                                                                                                                                                                                                                                                                                                                                                                                                                                                                                                                                                                                                                                                                                                                                                                                                                                                                                                                                                                                                                                                                                                                                                                                                                                                                                                                                                                                                                                                                                                                                                                                                                                                                                                                                                                                                                                                                                                                                                                                                                                                                                                                                                                                                                                                                                                                                                                                                                                                                                                                                                                                                                                                                                                                                                                                                                                                                                                    | 0 - 1                                   |                                                                   |        |       |                                                                                               |                                                                                                                 |                                                                                                         |                                                                                                                                                   |                      |                                         |                    |                                                                                                                                                   |     |    |                                                                                                           |                     |     |                                               |            |     |       |                       |                                |                                                                                                                                                   |                                                                   |     |       |   |     |                  |                                                                                                                                                   |                             |                                                                                   |              |     |       |   |     |   |                                                                                               |                           |       |       |                        |   |                      |                                                 |                    |       |                                                |     |   |     |   |                                                                                                         |   |   |     |   |   |     |  |  |                   |                         |                               |            |  |        |  |             |              |     |        |       |                         |                                              |     |    |  |  |                            |                                                        |     |    |  |  |                                            |  |  |  |  |  |  |    |                                                                                                                 |                   |               |            |  |  |        |  |             |         |       |     |        |       |                                                                                                                                                                                                                                                                                                                                                                                                                                                                                                                                                                                                                                                                                                                                                                                                                                                                                                                                                                                                                                                                                                                                                                                                                                                                                                                                                                                         |  |  |  |  |  |  |                       |          |                      |     |       |   |     |   |                                                                                                           |                     |     |       |            |     |       |                       |                                |   |       |   |  |  |  |                  |     |       |                 |              |   |       |   |     |   |                                                                                               |                           |   |       |                        |   |       |                                 |   |       |                                                |  |  |  |  |  |  |
| Models & Rescue                                | Animal model                                                                        | 2                                                                                                                                                                                                                                                                                                                                                                                                                                                                                                                                                                                                                                                                                                                                                                                                                                                                                                                                                                                                                                                                                                                                                                                                                                                                                                                                                                                                                                                                                                                                                                                                                                                                                                                                                                                                                                                                                                                                                                                                                                                                                                                                                                                                                                                                                                                                                                                                                                                                                                                                                                                                                                                                                                                                                                                                                                                                                                                                                                                                                                                                                                                                                                                                                                                                                                                                                                                                                                                                                                                                                                                                                                                                                                                                                                                                                                                                                                                                                                                                                                                                                                                                                                                                                                                                                                                                                                                                                                                      | 0 - 4                                   | 4                                                                 | 4.0    | 4     | Yang X et al. 2001 Apr 2 (11285272); Tan CK et al. 2013 Jun 19 (23782924) <sup>113; 114</sup> |                                                                                                                 |                                                                                                         |                                                                                                                                                   |                      |                                         |                    |                                                                                                                                                   |     |    |                                                                                                           |                     |     |                                               |            |     |       |                       |                                |                                                                                                                                                   |                                                                   |     |       |   |     |                  |                                                                                                                                                   |                             |                                                                                   |              |     |       |   |     |   |                                                                                               |                           |       |       |                        |   |                      |                                                 |                    |       |                                                |     |   |     |   |                                                                                                         |   |   |     |   |   |     |  |  |                   |                         |                               |            |  |        |  |             |              |     |        |       |                         |                                              |     |    |  |  |                            |                                                        |     |    |  |  |                                            |  |  |  |  |  |  |    |                                                                                                                 |                   |               |            |  |  |        |  |             |         |       |     |        |       |                                                                                                                                                                                                                                                                                                                                                                                                                                                                                                                                                                                                                                                                                                                                                                                                                                                                                                                                                                                                                                                                                                                                                                                                                                                                                                                                                                                         |  |  |  |  |  |  |                       |          |                      |     |       |   |     |   |                                                                                                           |                     |     |       |            |     |       |                       |                                |   |       |   |  |  |  |                  |     |       |                 |              |   |       |   |     |   |                                                                                               |                           |   |       |                        |   |       |                                 |   |       |                                                |  |  |  |  |  |  |
|                                                | Cell culture model system                                                           | 1                                                                                                                                                                                                                                                                                                                                                                                                                                                                                                                                                                                                                                                                                                                                                                                                                                                                                                                                                                                                                                                                                                                                                                                                                                                                                                                                                                                                                                                                                                                                                                                                                                                                                                                                                                                                                                                                                                                                                                                                                                                                                                                                                                                                                                                                                                                                                                                                                                                                                                                                                                                                                                                                                                                                                                                                                                                                                                                                                                                                                                                                                                                                                                                                                                                                                                                                                                                                                                                                                                                                                                                                                                                                                                                                                                                                                                                                                                                                                                                                                                                                                                                                                                                                                                                                                                                                                                                                                                                      | 0 - 2                                   |                                                                   |        |       |                                                                                               |                                                                                                                 |                                                                                                         |                                                                                                                                                   |                      |                                         |                    |                                                                                                                                                   |     |    |                                                                                                           |                     |     |                                               |            |     |       |                       |                                |                                                                                                                                                   |                                                                   |     |       |   |     |                  |                                                                                                                                                   |                             |                                                                                   |              |     |       |   |     |   |                                                                                               |                           |       |       |                        |   |                      |                                                 |                    |       |                                                |     |   |     |   |                                                                                                         |   |   |     |   |   |     |  |  |                   |                         |                               |            |  |        |  |             |              |     |        |       |                         |                                              |     |    |  |  |                            |                                                        |     |    |  |  |                                            |  |  |  |  |  |  |    |                                                                                                                 |                   |               |            |  |  |        |  |             |         |       |     |        |       |                                                                                                                                                                                                                                                                                                                                                                                                                                                                                                                                                                                                                                                                                                                                                                                                                                                                                                                                                                                                                                                                                                                                                                                                                                                                                                                                                                                         |  |  |  |  |  |  |                       |          |                      |     |       |   |     |   |                                                                                                           |                     |     |       |            |     |       |                       |                                |   |       |   |  |  |  |                  |     |       |                 |              |   |       |   |     |   |                                                                                               |                           |   |       |                        |   |       |                                 |   |       |                                                |  |  |  |  |  |  |
|                                                | Rescue in animal model                                                              | 2                                                                                                                                                                                                                                                                                                                                                                                                                                                                                                                                                                                                                                                                                                                                                                                                                                                                                                                                                                                                                                                                                                                                                                                                                                                                                                                                                                                                                                                                                                                                                                                                                                                                                                                                                                                                                                                                                                                                                                                                                                                                                                                                                                                                                                                                                                                                                                                                                                                                                                                                                                                                                                                                                                                                                                                                                                                                                                                                                                                                                                                                                                                                                                                                                                                                                                                                                                                                                                                                                                                                                                                                                                                                                                                                                                                                                                                                                                                                                                                                                                                                                                                                                                                                                                                                                                                                                                                                                                                      | 0 - 4                                   |                                                                   |        |       |                                                                                               |                                                                                                                 |                                                                                                         |                                                                                                                                                   |                      |                                         |                    |                                                                                                                                                   |     |    |                                                                                                           |                     |     |                                               |            |     |       |                       |                                |                                                                                                                                                   |                                                                   |     |       |   |     |                  |                                                                                                                                                   |                             |                                                                                   |              |     |       |   |     |   |                                                                                               |                           |       |       |                        |   |                      |                                                 |                    |       |                                                |     |   |     |   |                                                                                                         |   |   |     |   |   |     |  |  |                   |                         |                               |            |  |        |  |             |              |     |        |       |                         |                                              |     |    |  |  |                            |                                                        |     |    |  |  |                                            |  |  |  |  |  |  |    |                                                                                                                 |                   |               |            |  |  |        |  |             |         |       |     |        |       |                                                                                                                                                                                                                                                                                                                                                                                                                                                                                                                                                                                                                                                                                                                                                                                                                                                                                                                                                                                                                                                                                                                                                                                                                                                                                                                                                                                         |  |  |  |  |  |  |                       |          |                      |     |       |   |     |   |                                                                                                           |                     |     |       |            |     |       |                       |                                |   |       |   |  |  |  |                  |     |       |                 |              |   |       |   |     |   |                                                                                               |                           |   |       |                        |   |       |                                 |   |       |                                                |  |  |  |  |  |  |
|                                                | Rescue in engineered equivalent                                                     | 1                                                                                                                                                                                                                                                                                                                                                                                                                                                                                                                                                                                                                                                                                                                                                                                                                                                                                                                                                                                                                                                                                                                                                                                                                                                                                                                                                                                                                                                                                                                                                                                                                                                                                                                                                                                                                                                                                                                                                                                                                                                                                                                                                                                                                                                                                                                                                                                                                                                                                                                                                                                                                                                                                                                                                                                                                                                                                                                                                                                                                                                                                                                                                                                                                                                                                                                                                                                                                                                                                                                                                                                                                                                                                                                                                                                                                                                                                                                                                                                                                                                                                                                                                                                                                                                                                                                                                                                                                                                      | 0 - 2                                   |                                                                   |        |       |                                                                                               |                                                                                                                 |                                                                                                         |                                                                                                                                                   |                      |                                         |                    |                                                                                                                                                   |     |    |                                                                                                           |                     |     |                                               |            |     |       |                       |                                |                                                                                                                                                   |                                                                   |     |       |   |     |                  |                                                                                                                                                   |                             |                                                                                   |              |     |       |   |     |   |                                                                                               |                           |       |       |                        |   |                      |                                                 |                    |       |                                                |     |   |     |   |                                                                                                         |   |   |     |   |   |     |  |  |                   |                         |                               |            |  |        |  |             |              |     |        |       |                         |                                              |     |    |  |  |                            |                                                        |     |    |  |  |                                            |  |  |  |  |  |  |    |                                                                                                                 |                   |               |            |  |  |        |  |             |         |       |     |        |       |                                                                                                                                                                                                                                                                                                                                                                                                                                                                                                                                                                                                                                                                                                                                                                                                                                                                                                                                                                                                                                                                                                                                                                                                                                                                                                                                                                                         |  |  |  |  |  |  |                       |          |                      |     |       |   |     |   |                                                                                                           |                     |     |       |            |     |       |                       |                                |   |       |   |  |  |  |                  |     |       |                 |              |   |       |   |     |   |                                                                                               |                           |   |       |                        |   |       |                                 |   |       |                                                |  |  |  |  |  |  |
| Total Experimental Evidence Points (Maximum 6) |                                                                                     |                                                                                                                                                                                                                                                                                                                                                                                                                                                                                                                                                                                                                                                                                                                                                                                                                                                                                                                                                                                                                                                                                                                                                                                                                                                                                                                                                                                                                                                                                                                                                                                                                                                                                                                                                                                                                                                                                                                                                                                                                                                                                                                                                                                                                                                                                                                                                                                                                                                                                                                                                                                                                                                                                                                                                                                                                                                                                                                                                                                                                                                                                                                                                                                                                                                                                                                                                                                                                                                                                                                                                                                                                                                                                                                                                                                                                                                                                                                                                                                                                                                                                                                                                                                                                                                                                                                                                                                                                                                        |                                         |                                                                   |        |       | 5                                                                                             |                                                                                                                 |                                                                                                         |                                                                                                                                                   |                      |                                         |                    |                                                                                                                                                   |     |    |                                                                                                           |                     |     |                                               |            |     |       |                       |                                |                                                                                                                                                   |                                                                   |     |       |   |     |                  |                                                                                                                                                   |                             |                                                                                   |              |     |       |   |     |   |                                                                                               |                           |       |       |                        |   |                      |                                                 |                    |       |                                                |     |   |     |   |                                                                                                         |   |   |     |   |   |     |  |  |                   |                         |                               |            |  |        |  |             |              |     |        |       |                         |                                              |     |    |  |  |                            |                                                        |     |    |  |  |                                            |  |  |  |  |  |  |    |                                                                                                                 |                   |               |            |  |  |        |  |             |         |       |     |        |       |                                                                                                                                                                                                                                                                                                                                                                                                                                                                                                                                                                                                                                                                                                                                                                                                                                                                                                                                                                                                                                                                                                                                                                                                                                                                                                                                                                                         |  |  |  |  |  |  |                       |          |                      |     |       |   |     |   |                                                                                                           |                     |     |       |            |     |       |                       |                                |   |       |   |  |  |  |                  |     |       |                 |              |   |       |   |     |   |                                                                                               |                           |   |       |                        |   |       |                                 |   |       |                                                |  |  |  |  |  |  |

**Figure S54: Summary of evidence supporting a relationship between SMAD3 and autosomal dominant aneurysm-osteoarthritis syndrome.**



| Assertion criteria                  | Genetic Evidence (0-12 points)                                                                 | Experimental Evidence (0-6 points)                                         | Total Points (0-18)                    | Replication Over Time (Y/N)                        |
|-------------------------------------|------------------------------------------------------------------------------------------------|----------------------------------------------------------------------------|----------------------------------------|----------------------------------------------------|
| <b>Description</b>                  | Case-level, family segregation, or case-control data that support the gene-disease association | Gene-level experimental evidence that support the gene-disease association | Sum of Genetic & Experimental Evidence | > 2 pubs w/ convincing evidence over time (>3 yrs) |
| <b>Assigned Points</b>              | <b>12</b>                                                                                      | <b>5</b>                                                                   | <b>17</b>                              | <b>YES</b>                                         |
| <b>CALCULATED CLASSIFICATION</b>    |                                                                                                | <b>LIMITED</b>                                                             | <b>1-6</b>                             |                                                    |
|                                     |                                                                                                | <b>MODERATE</b>                                                            | <b>7-11</b>                            |                                                    |
|                                     |                                                                                                | <b>STRONG</b>                                                              | <b>12-18</b>                           |                                                    |
|                                     |                                                                                                | <b>DEFINITIVE</b>                                                          | <b>12-18 AND replication over time</b> |                                                    |
| Valid contradictory evidence (Y/N)* | NO                                                                                             |                                                                            |                                        |                                                    |
|                                     | <b>CALCULATED CLASSIFICATION (DATE)</b>                                                        | <b>DEFINITIVE</b><br>03/30/2016                                            |                                        |                                                    |
|                                     | <b>EXPERT CURATION (DATE)</b>                                                                  | <b>DEFINITIVE</b><br>12/01/2016                                            |                                        |                                                    |

**Figure S55: Summary matrix and classification for *SMAD3* and autosomal dominant aneurysm-osteoarthritis syndrome.**

**SMARCA1 and autosomal dominant syndromic intellectual disability with Coffin-Syris-like features**

| Evidence Type                              |                                                | Case Information Type                                                                                  |                                                                                     | Guidelines                                                        |       |        | Scores |                                                   | PMIDs/Notes |                                                      |
|--------------------------------------------|------------------------------------------------|--------------------------------------------------------------------------------------------------------|-------------------------------------------------------------------------------------|-------------------------------------------------------------------|-------|--------|--------|---------------------------------------------------|-------------|------------------------------------------------------|
|                                            |                                                |                                                                                                        |                                                                                     | Default                                                           | Range | Max    | Points | Tally                                             |             |                                                      |
| Genetic Evidence                           | Case-Level Data                                | Variant Evidence                                                                                       | Autosomal Dominant or X-linked Disorder                                             | Variant is de novo                                                | 2     | 0-3    | 12     |                                                   |             |                                                      |
|                                            |                                                |                                                                                                        |                                                                                     | Proband with predicted or proven null variant                     | 1.5   | 0-2    | 10     | 1.5                                               | 1.5         | Karaca E et al. 2015 Nov 4 (26539891) <sup>115</sup> |
|                                            |                                                |                                                                                                        |                                                                                     | Proband with other variant type with some evidence of gene impact | 0.5   | 0-1.5  | 7      |                                                   |             |                                                      |
|                                            |                                                | Autosomal Recessive Disease                                                                            | Two variants in trans and at least one de novo or a predicted/proven null variant   | 2                                                                 | 0-3   | 12     |        |                                                   |             |                                                      |
|                                            |                                                |                                                                                                        | Two variants (not predicted/proven null) with some evidence of gene impact in trans | 1                                                                 | 0-1.5 |        |        |                                                   |             |                                                      |
|                                            | Segregation Evidence                           | Evidence of segregation in one or more families                                                        | LOD Score Examples                                                                  | 3                                                                 | 5     | 0-7    | 7      |                                                   |             |                                                      |
|                                            |                                                |                                                                                                        |                                                                                     | 2                                                                 | 4     |        |        |                                                   |             |                                                      |
|                                            |                                                |                                                                                                        |                                                                                     | 1.5                                                               | 3     |        |        |                                                   |             |                                                      |
|                                            |                                                |                                                                                                        |                                                                                     | 1                                                                 | 1.5   |        |        |                                                   |             |                                                      |
|                                            |                                                |                                                                                                        |                                                                                     |                                                                   |       |        |        |                                                   |             |                                                      |
| Case-Control Data                          | Case-Control Study Type                        | Case-Control Quality Criteria                                                                          |                                                                                     | Guidelines                                                        |       | Scores |        | PMIDs/Notes                                       |             |                                                      |
|                                            |                                                |                                                                                                        |                                                                                     | Points/Study                                                      | Max   | Points | Tally  |                                                   |             |                                                      |
|                                            | Single Variant Analysis                        | 1. Variant Detection Methodology<br>2. Power<br>3. Bias and confounding<br>4. Statistical Significance |                                                                                     | 0-6                                                               | 12    |        |        |                                                   |             |                                                      |
|                                            | Aggregate Variant Analysis                     |                                                                                                        |                                                                                     | 0-6                                                               | 12    |        |        |                                                   |             |                                                      |
| Total Genetic Evidence Points (Maximum 12) |                                                |                                                                                                        |                                                                                     |                                                                   |       |        | 1.5    |                                                   |             |                                                      |
| Experimental Evidence                      | Function                                       | Biochemical Function                                                                                   | 0.5                                                                                 | 0 - 2                                                             | 2     | 1.0    | 1      | Lopes F et al. 2016 Mar (26740508) <sup>116</sup> |             |                                                      |
|                                            |                                                |                                                                                                        | 0.5                                                                                 | 0 - 2                                                             |       |        |        |                                                   |             |                                                      |
|                                            |                                                |                                                                                                        | 0.5                                                                                 | 0 - 2                                                             |       |        |        |                                                   |             |                                                      |
|                                            | Functional Alteration                          | Cells from affected individual                                                                         | 1                                                                                   | 0 - 2                                                             | 2     |        |        |                                                   |             |                                                      |
|                                            |                                                |                                                                                                        | 0.5                                                                                 | 0 - 1                                                             |       |        |        |                                                   |             |                                                      |
|                                            | Models & Rescue                                | Animal model                                                                                           | 2                                                                                   | 0 - 4                                                             | 4     | 2.0    | 2      | Lopes F et al. 2016 Mar (26740508) <sup>116</sup> |             |                                                      |
|                                            |                                                |                                                                                                        | 1                                                                                   | 0 - 2                                                             |       |        |        |                                                   |             |                                                      |
|                                            |                                                |                                                                                                        | 2                                                                                   | 0 - 4                                                             |       |        |        |                                                   |             |                                                      |
|                                            |                                                |                                                                                                        | 1                                                                                   | 0 - 2                                                             |       |        |        |                                                   |             |                                                      |
|                                            | Total Experimental Evidence Points (Maximum 6) |                                                                                                        |                                                                                     |                                                                   |       |        |        | 3                                                 |             |                                                      |

**Figure S56: Summary of evidence supporting a relationship between SMARCA1 and autosomal dominant syndromic intellectual disability with Coffin-Syris-like features.**

| Assertion criteria                      | Genetic Evidence (0-12 points)                                                                 | Experimental Evidence (0-6 points)                                         | Total Points (0-18)                    | Replication Over Time (Y/N)                        |
|-----------------------------------------|------------------------------------------------------------------------------------------------|----------------------------------------------------------------------------|----------------------------------------|----------------------------------------------------|
| <b>Description</b>                      | Case-level, family segregation, or case-control data that support the gene-disease association | Gene-level experimental evidence that support the gene-disease association | Sum of Genetic & Experimental Evidence | > 2 pubs w/ convincing evidence over time (>3 yrs) |
| <b>Assigned Points</b>                  | <b>1.5</b>                                                                                     | <b>3</b>                                                                   | <b>4.5</b>                             | <b>NO</b>                                          |
| <b>CALCULATED CLASSIFICATION</b>        |                                                                                                | <b>LIMITED</b>                                                             | <b>1-6</b>                             |                                                    |
|                                         |                                                                                                | <b>MODERATE</b>                                                            | <b>7-11</b>                            |                                                    |
|                                         |                                                                                                | <b>STRONG</b>                                                              | <b>12-18</b>                           |                                                    |
|                                         |                                                                                                | <b>DEFINITIVE</b>                                                          | <b>12-18 AND replication over time</b> |                                                    |
| Valid contradictory evidence (Y/N)*     | NO                                                                                             |                                                                            |                                        |                                                    |
| <b>CALCULATED CLASSIFICATION (DATE)</b> |                                                                                                | <b>LIMITED</b><br>06/14/2016                                               |                                        |                                                    |
| <b>EXPERT CURATION (DATE)</b>           |                                                                                                | <b>MODERATE</b><br>11/15/2016                                              |                                        |                                                    |

**Figure S57: Summary matrix and classification for *SMARCA1* and autosomal dominant syndromic intellectual disability with Coffin-Syris-like features.**

| SOS2 and autosomal dominant Noonan syndrome |                                                |                                                                                                        |                                                                                     |                                                                   |     |        |       |                                                                                                                                                              |     |   |                                                                                                   |                                                                                                   |
|---------------------------------------------|------------------------------------------------|--------------------------------------------------------------------------------------------------------|-------------------------------------------------------------------------------------|-------------------------------------------------------------------|-----|--------|-------|--------------------------------------------------------------------------------------------------------------------------------------------------------------|-----|---|---------------------------------------------------------------------------------------------------|---------------------------------------------------------------------------------------------------|
|                                             | Evidence Type                                  | Case Information Type                                                                                  | Guidelines                                                                          |                                                                   |     | Scores |       | PMIDs/Notes                                                                                                                                                  |     |   |                                                                                                   |                                                                                                   |
|                                             |                                                |                                                                                                        | Default                                                                             | Range                                                             | Max | Points | Tally |                                                                                                                                                              |     |   |                                                                                                   |                                                                                                   |
| Genetic Evidence                            | Case-Level Data                                | Variant Evidence                                                                                       | Autosomal Dominant or X-linked Disorder                                             | Variant is de novo                                                |     | 2      | 0-3   | 12                                                                                                                                                           | 4.0 | 4 | Yamamoto GL et al. 2015 Jun (25795793); Cordeddu V et al. 2015 Nov (26173643) <sup>117, 118</sup> |                                                                                                   |
|                                             |                                                |                                                                                                        |                                                                                     | Proband with predicted or proven null variant                     |     | 1.5    | 0-2   | 10                                                                                                                                                           |     |   |                                                                                                   |                                                                                                   |
|                                             |                                                |                                                                                                        |                                                                                     | Proband with other variant type with some evidence of gene impact |     | 0.5    | 0-1.5 | 7                                                                                                                                                            | 3.0 | 3 |                                                                                                   | Yamamoto GL et al. 2015 Jun (25795793); Cordeddu V et al. 2015 Nov (26173643) <sup>117, 118</sup> |
|                                             |                                                | Autosomal Recessive Disease                                                                            | Two variants in trans and at least one de novo or a predicted/proven null variant   |                                                                   | 2   | 0-3    | 12    |                                                                                                                                                              |     |   |                                                                                                   |                                                                                                   |
|                                             |                                                |                                                                                                        | Two variants (not predicted/proven null) with some evidence of gene impact in trans |                                                                   | 1   | 0-1.5  |       |                                                                                                                                                              |     |   |                                                                                                   |                                                                                                   |
|                                             | Segregation Evidence                           | Evidence of segregation in one or more families                                                        | LOD Score Examples                                                                  | 3                                                                 | 5   | 0-7    | 7     |                                                                                                                                                              |     |   |                                                                                                   |                                                                                                   |
|                                             |                                                |                                                                                                        |                                                                                     | 2                                                                 | 4   |        |       |                                                                                                                                                              |     |   |                                                                                                   |                                                                                                   |
|                                             |                                                |                                                                                                        |                                                                                     | 1.5                                                               | 3   |        |       |                                                                                                                                                              |     |   |                                                                                                   |                                                                                                   |
|                                             |                                                |                                                                                                        |                                                                                     | 1                                                                 | 1.5 |        |       |                                                                                                                                                              |     |   |                                                                                                   |                                                                                                   |
|                                             |                                                |                                                                                                        |                                                                                     |                                                                   |     |        |       |                                                                                                                                                              |     |   |                                                                                                   |                                                                                                   |
| Case-Control Data                           | Case-Control Study Type                        | Case-Control Quality Criteria                                                                          |                                                                                     | Guidelines                                                        |     | Scores |       | PMIDs/Notes                                                                                                                                                  |     |   |                                                                                                   |                                                                                                   |
|                                             |                                                |                                                                                                        |                                                                                     | Points/Study                                                      | Max | Points | Tally |                                                                                                                                                              |     |   |                                                                                                   |                                                                                                   |
|                                             | Single Variant Analysis                        | 1. Variant Detection Methodology<br>2. Power<br>3. Bias and confounding<br>4. Statistical Significance |                                                                                     | 0-6                                                               | 12  |        |       |                                                                                                                                                              |     |   |                                                                                                   |                                                                                                   |
|                                             | Aggregate Variant Analysis                     |                                                                                                        |                                                                                     | 0-6                                                               | 12  |        |       |                                                                                                                                                              |     |   |                                                                                                   |                                                                                                   |
| Total Genetic Evidence Points (Maximum 12)  |                                                |                                                                                                        |                                                                                     |                                                                   |     |        |       |                                                                                                                                                              | 7   |   |                                                                                                   |                                                                                                   |
| Experimental Evidence                       | Function                                       | Biochemical Function                                                                                   | 0.5                                                                                 | 0 - 2                                                             | 2   | 0.5    | 0.5   | Cordeddu V et al. 2015 Nov (26173643) <sup>118</sup>                                                                                                         |     |   |                                                                                                   |                                                                                                   |
|                                             |                                                |                                                                                                        | 0.5                                                                                 | 0 - 2                                                             |     |        |       |                                                                                                                                                              |     |   |                                                                                                   |                                                                                                   |
|                                             |                                                |                                                                                                        | 0.5                                                                                 | 0 - 2                                                             |     |        |       |                                                                                                                                                              |     |   |                                                                                                   |                                                                                                   |
|                                             | Functional Alteration                          | Cells from affected individual                                                                         | 1                                                                                   | 0 - 2                                                             | 2   | 0.5    | 0.5   | Cordeddu V et al. 2015 Nov (26173643) <sup>118</sup>                                                                                                         |     |   |                                                                                                   |                                                                                                   |
|                                             |                                                |                                                                                                        | 0.5                                                                                 | 0 - 1                                                             |     |        |       |                                                                                                                                                              |     |   |                                                                                                   |                                                                                                   |
|                                             | Models & Rescue                                | Animal model                                                                                           | 2                                                                                   | 0 - 4                                                             | 4   | 0.0    | 0     | Esteban LM et al. 2000 Sep (10938118) <sup>119</sup> (No points are given. A knock-out mouse described here and this disease mechanism is gain of function.) |     |   |                                                                                                   |                                                                                                   |
|                                             |                                                |                                                                                                        | 1                                                                                   | 0 - 2                                                             |     |        |       |                                                                                                                                                              |     |   |                                                                                                   |                                                                                                   |
|                                             |                                                |                                                                                                        | 2                                                                                   | 0 - 4                                                             |     |        |       |                                                                                                                                                              |     |   |                                                                                                   |                                                                                                   |
|                                             |                                                |                                                                                                        | 1                                                                                   | 0 - 2                                                             |     |        |       |                                                                                                                                                              |     |   |                                                                                                   |                                                                                                   |
|                                             | Total Experimental Evidence Points (Maximum 6) |                                                                                                        |                                                                                     |                                                                   |     |        |       |                                                                                                                                                              |     | 1 |                                                                                                   |                                                                                                   |

Figure S58: Summary of evidence supporting a relationship between SOS2 and autosomal dominant Noonan syndrome.

| Assertion criteria                      | Genetic Evidence (0-12 points)                                                                 | Experimental Evidence (0-6 points)                                         | Total Points (0-18)                    | Replication Over Time (Y/N)                        |
|-----------------------------------------|------------------------------------------------------------------------------------------------|----------------------------------------------------------------------------|----------------------------------------|----------------------------------------------------|
| <b>Description</b>                      | Case-level, family segregation, or case-control data that support the gene-disease association | Gene-level experimental evidence that support the gene-disease association | Sum of Genetic & Experimental Evidence | > 2 pubs w/ convincing evidence over time (>3 yrs) |
| <b>Assigned Points</b>                  | <b>7</b>                                                                                       | <b>1</b>                                                                   | <b>8</b>                               | <b>NO</b>                                          |
| <b>CALCULATED CLASSIFICATION</b>        |                                                                                                | <b>LIMITED</b>                                                             | <b>1-6</b>                             |                                                    |
|                                         |                                                                                                | <b>MODERATE</b>                                                            | <b>7-11</b>                            |                                                    |
|                                         |                                                                                                | <b>STRONG</b>                                                              | <b>12-18</b>                           |                                                    |
|                                         |                                                                                                | <b>DEFINITIVE</b>                                                          | <b>12-18 AND replication over time</b> |                                                    |
| Valid contradictory evidence (Y/N)*     | NO                                                                                             |                                                                            |                                        |                                                    |
| <b>CALCULATED CLASSIFICATION (DATE)</b> |                                                                                                | <b>MODERATE</b><br>05/26/2016                                              |                                        |                                                    |
| <b>EXPERT CURATION (DATE)</b>           |                                                                                                | <b>MODERATE</b><br>12/05/16                                                |                                        |                                                    |

**Figure S59: Summary matrix and classification for *SOS2* and autosomal dominant Noonan syndrome.**

**TMPO and autosomal dominant dilated cardiomyopathy**

| Evidence Type                                  | Case Information Type                           | Guidelines                                                                          |                                                                   |       | Scores |       | PMIDs/Notes |                                                                                                                              |
|------------------------------------------------|-------------------------------------------------|-------------------------------------------------------------------------------------|-------------------------------------------------------------------|-------|--------|-------|-------------|------------------------------------------------------------------------------------------------------------------------------|
|                                                |                                                 | Default                                                                             | Range                                                             | Max   | Points | Tally |             |                                                                                                                              |
| Genetic Evidence                               | Variant Evidence                                | Autosomal Dominant or X-linked Disorder                                             | Variant is de novo                                                |       | 2      | 0-3   | 12          | Taylor MR et al. 2005 Dec (16247757) <sup>120</sup> (c.2068C>T is classified as Benign/Likely Benign by ClinVar submitters.) |
|                                                |                                                 |                                                                                     | Proband with predicted or proven null variant                     |       | 1.5    | 0-2   | 10          |                                                                                                                              |
|                                                |                                                 |                                                                                     | Proband with other variant type with some evidence of gene impact |       | 0.5    | 0-1.5 | 7           |                                                                                                                              |
|                                                | Autosomal Recessive Disease                     | Two variants in trans and at least one de novo or a predicted/proven null variant   |                                                                   | 2     | 0-3    | 12    |             |                                                                                                                              |
|                                                |                                                 | Two variants (not predicted/proven null) with some evidence of gene impact in trans |                                                                   | 1     | 0-1.5  |       |             |                                                                                                                              |
| Segregation Evidence                           | Evidence of segregation in one or more families | LOD Score Examples                                                                  | 3                                                                 | 5     | 0-7    | 7     |             |                                                                                                                              |
|                                                |                                                 |                                                                                     | 2                                                                 | 4     |        |       |             |                                                                                                                              |
|                                                |                                                 |                                                                                     | 1.5                                                               | 3     |        |       |             |                                                                                                                              |
|                                                |                                                 |                                                                                     | 1                                                                 | 1.5   |        |       |             |                                                                                                                              |
|                                                |                                                 |                                                                                     |                                                                   |       |        |       |             |                                                                                                                              |
| Case-Control Data                              | Case-Control Study Type                         | Case-Control Quality Criteria                                                       | Guidelines                                                        |       | Scores |       | PMIDs/Notes |                                                                                                                              |
|                                                |                                                 |                                                                                     | Points/Study                                                      | Max   | Points | Tally |             |                                                                                                                              |
|                                                | Single Variant Analysis                         | 1. Variant Detection Methodology<br>2. Power                                        | 0-6                                                               | 12    |        |       |             |                                                                                                                              |
|                                                | Aggregate Variant Analysis                      | 3. Bias and confounding<br>4. Statistical Significance                              | 0-6                                                               | 12    |        |       |             |                                                                                                                              |
| Total Genetic Evidence Points (Maximum 12)     |                                                 |                                                                                     |                                                                   |       |        | 0     |             |                                                                                                                              |
| Experimental Evidence                          | Function                                        | Biochemical Function                                                                | 0.5                                                               | 0 - 2 | 2      | 0.5   | 0.5         | Taylor MR et al. 2005 Dec (16247757) <sup>120</sup> (Interaction of mutated protein product with A-type Lamins)              |
|                                                |                                                 |                                                                                     | 0.5                                                               | 0 - 2 |        |       |             |                                                                                                                              |
|                                                | Functional Alteration                           | Protein Interaction                                                                 | 0.5                                                               | 0 - 2 | 2      |       |             |                                                                                                                              |
|                                                |                                                 |                                                                                     | 0.5                                                               | 0 - 2 |        |       |             |                                                                                                                              |
|                                                | Models & Rescue                                 | Expression                                                                          | Cells from affected individual                                    | 1     | 0 - 2  | 2     |             |                                                                                                                              |
|                                                |                                                 |                                                                                     | Engineered cells                                                  | 0.5   | 0 - 1  |       |             |                                                                                                                              |
|                                                |                                                 |                                                                                     | Animal model                                                      | 2     | 0 - 4  | 4     |             |                                                                                                                              |
|                                                |                                                 |                                                                                     | Cell culture model system                                         | 1     | 0 - 2  |       |             |                                                                                                                              |
|                                                | Rescue in animal model                          | 2                                                                                   | 0 - 4                                                             |       |        |       |             |                                                                                                                              |
|                                                | Rescue in engineered equivalent                 | 1                                                                                   | 0 - 2                                                             |       |        |       |             |                                                                                                                              |
| Total Experimental Evidence Points (Maximum 6) |                                                 |                                                                                     |                                                                   |       |        | 0.5   |             |                                                                                                                              |

**Figure S60: Summary of evidence for a relationship between *TMPO* and autosomal dominant dilated cardiomyopathy.**

| Assertion criteria                         | Genetic Evidence (0-12 points)                                                                                                                                                                        | Experimental Evidence (0-6 points)                                         | Total Points (0-18)                    | Replication Over Time (Y/N)                        |
|--------------------------------------------|-------------------------------------------------------------------------------------------------------------------------------------------------------------------------------------------------------|----------------------------------------------------------------------------|----------------------------------------|----------------------------------------------------|
| <b>Description</b>                         | Case-level, family segregation, or case-control data that support the gene-disease association                                                                                                        | Gene-level experimental evidence that support the gene-disease association | Sum of Genetic & Experimental Evidence | > 2 pubs w/ convincing evidence over time (>3 yrs) |
| <b>Assigned Points</b>                     |                                                                                                                                                                                                       | <b>0.5</b>                                                                 | <b>0.5</b>                             | <b>NO</b>                                          |
| <b>CALCULATED CLASSIFICATION</b>           |                                                                                                                                                                                                       | <b>LIMITED</b>                                                             | <b>1-6</b>                             |                                                    |
|                                            |                                                                                                                                                                                                       | <b>MODERATE</b>                                                            | <b>7-11</b>                            |                                                    |
|                                            |                                                                                                                                                                                                       | <b>STRONG</b>                                                              | <b>12-18</b>                           |                                                    |
|                                            |                                                                                                                                                                                                       | <b>DEFINITIVE</b>                                                          | <b>12-18 AND replication over time</b> |                                                    |
| <b>Valid contradictory evidence (Y/N)*</b> | YES Taylor MR et al. 2005 Dec (16247757) <sup>120</sup> publication frequency in ExAC. <sup>7</sup> (The only variant that has been reported in association with human disease has been found at high |                                                                            |                                        |                                                    |
|                                            | <b>CALCULATED CLASSIFICATION (DATE)</b>                                                                                                                                                               | <b>CONFLICTING EVIDENCE REPORTED</b><br>10/07/16                           |                                        |                                                    |
|                                            | <b>EXPERT CURATION (DATE)</b>                                                                                                                                                                         | <b>REFUTED</b><br>11/30/2016                                               |                                        |                                                    |

**Figure S61: Summary matrix and classification for *TMPO* and autosomal dominant dilated cardiomyopathy.**

### VPS8 and autosomal recessive arthrogyrosis

| Evidence Type                                         |                                                 | Case Information Type          |                                                                                                        | Guidelines                                                        |       |        | Scores |             | PMIDs/Notes                                                                                   |     |       |
|-------------------------------------------------------|-------------------------------------------------|--------------------------------|--------------------------------------------------------------------------------------------------------|-------------------------------------------------------------------|-------|--------|--------|-------------|-----------------------------------------------------------------------------------------------|-----|-------|
|                                                       |                                                 |                                |                                                                                                        | Default                                                           | Range | Max    | Points | Tally       |                                                                                               |     |       |
| Genetic Evidence                                      | Case-Level Data                                 | Variant Evidence               | Autosomal Dominant or X-linked Disorder                                                                | Variant is de novo                                                | 2     | 0-3    | 12     |             |                                                                                               |     |       |
|                                                       |                                                 |                                |                                                                                                        | Proband with predicted or proven null variant                     | 1.5   | 0-2    | 10     |             |                                                                                               |     |       |
|                                                       |                                                 |                                |                                                                                                        | Proband with other variant type with some evidence of gene impact | 0.5   | 0-1.5  | 7      |             |                                                                                               |     |       |
|                                                       |                                                 | Autosomal Recessive Disease    | Two variants in trans and at least one de novo or a predicted/proven null variant                      | 2                                                                 | 0-3   | 12     | 0.0    | 0.5         | Bayram Y et al. 2016 Feb (26752647) <sup>61</sup>                                             |     |       |
|                                                       |                                                 |                                | Two variants (not predicted/proven null) with some evidence of gene impact in trans                    | 1                                                                 | 0-1.5 |        | 0.5    |             |                                                                                               |     |       |
| Segregation Evidence                                  | Evidence of segregation in one or more families | LOD Score Examples             | 3                                                                                                      | 5                                                                 | 0-7   | 7      |        |             |                                                                                               |     |       |
|                                                       |                                                 |                                | 2                                                                                                      | 4                                                                 |       |        |        |             |                                                                                               |     |       |
|                                                       |                                                 |                                | 1.5                                                                                                    | 3                                                                 |       |        |        |             |                                                                                               |     |       |
|                                                       |                                                 |                                | 1                                                                                                      | 1.5                                                               |       |        |        |             |                                                                                               |     |       |
|                                                       |                                                 |                                |                                                                                                        |                                                                   |       |        |        |             |                                                                                               |     |       |
| Case-Control Data                                     | Case-Control Study Type                         | Case-Control Quality Criteria  |                                                                                                        | Guidelines                                                        |       | Scores |        | PMIDs/Notes |                                                                                               |     |       |
|                                                       |                                                 |                                |                                                                                                        | Points/Study                                                      | Max   | Points | Tally  |             |                                                                                               |     |       |
|                                                       |                                                 | Single Variant Analysis        | 1. Variant Detection Methodology<br>2. Power<br>3. Bias and confounding<br>4. Statistical Significance |                                                                   | 0-6   | 12     |        |             |                                                                                               |     |       |
|                                                       |                                                 |                                |                                                                                                        |                                                                   | 0-6   | 12     |        |             |                                                                                               |     |       |
| <b>Total Genetic Evidence Points (Maximum 12)</b>     |                                                 |                                |                                                                                                        |                                                                   |       |        |        | <b>0.5</b>  |                                                                                               |     |       |
| Experimental Evidence                                 | Function                                        | Biochemical Function           |                                                                                                        | 0.5                                                               | 0 - 2 | 2      | 1.5    | 1.5         | Horazdovsky BF et al. 1996 Dec 27 (8969229); Epp N et al. 2013 (23840658) <sup>121, 122</sup> |     |       |
|                                                       |                                                 |                                |                                                                                                        | Protein Interaction                                               |       |        |        |             |                                                                                               | 0.5 | 0 - 2 |
|                                                       |                                                 |                                |                                                                                                        | Expression                                                        |       |        |        |             |                                                                                               | 0.5 | 0 - 2 |
|                                                       | Functional Alteration                           | Cells from affected individual |                                                                                                        | 1                                                                 | 0 - 2 | 2      | 0.0    | 0           |                                                                                               |     |       |
|                                                       |                                                 | Engineered cells               |                                                                                                        | 0.5                                                               | 0 - 1 |        |        |             |                                                                                               |     |       |
|                                                       | Models & Rescue                                 | Animal model                   |                                                                                                        | 2                                                                 | 0 - 4 | 4      | 0.0    | 0           |                                                                                               |     |       |
|                                                       |                                                 | Cell culture model system      |                                                                                                        | 1                                                                 | 0 - 2 |        |        |             |                                                                                               |     |       |
|                                                       |                                                 | Rescue in animal model         |                                                                                                        | 2                                                                 | 0 - 4 |        |        |             |                                                                                               |     |       |
| Rescue in engineered equivalent                       |                                                 | 1                              | 0 - 2                                                                                                  |                                                                   |       |        |        |             |                                                                                               |     |       |
| <b>Total Experimental Evidence Points (Maximum 6)</b> |                                                 |                                |                                                                                                        |                                                                   |       |        |        | <b>1.5</b>  |                                                                                               |     |       |

**Figure S62: Summary of evidence supporting a relationship between VPS8 and autosomal recessive arthrogyrosis.**



| Assertion criteria                      | Genetic Evidence (0-12 points)                                                                 | Experimental Evidence (0-6 points)                                         | Total Points (0-18)                    | Replication Over Time (Y/N)                        |
|-----------------------------------------|------------------------------------------------------------------------------------------------|----------------------------------------------------------------------------|----------------------------------------|----------------------------------------------------|
| <b>Description</b>                      | Case-level, family segregation, or case-control data that support the gene-disease association | Gene-level experimental evidence that support the gene-disease association | Sum of Genetic & Experimental Evidence | > 2 pubs w/ convincing evidence over time (>3 yrs) |
| <b>Assigned Points</b>                  | <b>0.5</b>                                                                                     | <b>1.5</b>                                                                 | <b>2</b>                               | <b>NO</b>                                          |
| <b>CALCULATED CLASSIFICATION</b>        |                                                                                                | <b>LIMITED</b>                                                             | <b>1-6</b>                             |                                                    |
|                                         |                                                                                                | <b>MODERATE</b>                                                            | <b>7-11</b>                            |                                                    |
|                                         |                                                                                                | <b>STRONG</b>                                                              | <b>12-18</b>                           |                                                    |
|                                         |                                                                                                | <b>DEFINITIVE</b>                                                          | <b>12-18 AND replication over time</b> |                                                    |
| Valid contradictory evidence (Y/N)*     | NO                                                                                             |                                                                            |                                        |                                                    |
| <b>CALCULATED CLASSIFICATION (DATE)</b> |                                                                                                | <b>LIMITED</b>                                                             |                                        |                                                    |
| <b>EXPERT CURATION (DATE)</b>           |                                                                                                | <b>LIMITED</b><br>11/24/2016                                               |                                        |                                                    |

**Figure S63: Summary matrix and classification for *VPS8* and autosomal recessive arthrogyposis.**

**WRAP53 and autosomal recessive dyskeratosis congenital**

| Genetic Evidence                               | Evidence Type                                   | Case Information Type                                                                                  | Guidelines                                                        |       |        | Scores |                                                                                                   | PMIDs/Notes                                                                                                                                       |
|------------------------------------------------|-------------------------------------------------|--------------------------------------------------------------------------------------------------------|-------------------------------------------------------------------|-------|--------|--------|---------------------------------------------------------------------------------------------------|---------------------------------------------------------------------------------------------------------------------------------------------------|
|                                                |                                                 |                                                                                                        | Default                                                           | Range | Max    | Points | Tally                                                                                             |                                                                                                                                                   |
|                                                |                                                 |                                                                                                        |                                                                   |       |        |        |                                                                                                   |                                                                                                                                                   |
| Case-Level Data                                | Variant Evidence                                | Autosomal Dominant or X-linked Disorder                                                                | Variant is de novo                                                |       | 2      | 0-3    | 12                                                                                                |                                                                                                                                                   |
|                                                |                                                 |                                                                                                        | Proband with predicted or proven null variant                     |       | 1.5    | 0-2    | 10                                                                                                |                                                                                                                                                   |
|                                                |                                                 |                                                                                                        | Proband with other variant type with some evidence of gene impact |       | 0.5    | 0-1.5  | 7                                                                                                 |                                                                                                                                                   |
|                                                | Autosomal Recessive Disease                     | Two variants in trans and at least one de novo or a predicted/proven null variant                      |                                                                   | 2     | 0-3    | 12     | 3.5                                                                                               | Zhong F et al. 2011 Jan 1 (21205863) <sup>123</sup> (The expert chose to upgrade the variant points because of the specificity of the phenotype.) |
|                                                |                                                 | Two variants (not predicted/proven null) with some evidence of gene impact in trans                    |                                                                   | 1     | 0-1.5  |        |                                                                                                   |                                                                                                                                                   |
| Segregation Evidence                           | Evidence of segregation in one or more families | LOD Score Examples                                                                                     | 3                                                                 | 5     | 0-7    | 7      |                                                                                                   |                                                                                                                                                   |
|                                                |                                                 |                                                                                                        | 2                                                                 | 4     |        |        |                                                                                                   |                                                                                                                                                   |
|                                                |                                                 |                                                                                                        | 1.5                                                               | 3     |        |        |                                                                                                   |                                                                                                                                                   |
|                                                |                                                 |                                                                                                        | 1                                                                 | 1.5   |        |        |                                                                                                   |                                                                                                                                                   |
|                                                |                                                 |                                                                                                        |                                                                   |       |        |        |                                                                                                   |                                                                                                                                                   |
| Case-Control Data                              | Case-Control Study Type                         | Case-Control Quality Criteria                                                                          | Guidelines                                                        |       | Scores |        | PMIDs/Notes                                                                                       |                                                                                                                                                   |
|                                                |                                                 |                                                                                                        | Points/Study                                                      | Max   | Points | Tally  |                                                                                                   |                                                                                                                                                   |
|                                                | Single Variant Analysis                         | 1. Variant Detection Methodology<br>2. Power<br>3. Bias and confounding<br>4. Statistical Significance | 0-6                                                               | 12    |        |        |                                                                                                   |                                                                                                                                                   |
| Aggregate Variant Analysis                     | 0-6                                             |                                                                                                        | 12                                                                |       |        |        |                                                                                                   |                                                                                                                                                   |
| Total Genetic Evidence Points (Maximum 12)     |                                                 |                                                                                                        |                                                                   |       |        |        | 3.5                                                                                               |                                                                                                                                                   |
| Experimental Evidence                          | Function                                        | Biochemical Function                                                                                   | 0.5                                                               | 0 - 2 | 2      | 2.5    | 2                                                                                                 | Freund A et al. 2014 Dec 4 (25467444); Zhong F et al. 2011 Jan 1 (21205863); Mahmoudi S et al. 2010 Nov 2 (21072240) <sup>74; 123; 124</sup>      |
|                                                |                                                 | Protein Interaction                                                                                    | 0.5                                                               | 0 - 2 |        |        |                                                                                                   |                                                                                                                                                   |
|                                                |                                                 | Expression                                                                                             | 0.5                                                               | 0 - 2 |        |        |                                                                                                   |                                                                                                                                                   |
|                                                | Functional Alteration                           | Cells from affected individual                                                                         | 1                                                                 | 0 - 2 | 2      | 3.5    | 2                                                                                                 | Zhong F et al. 2011 Jan 1 (21205863); Batista LF et al. 2011 May 22 (21602826) <sup>123; 125</sup>                                                |
|                                                |                                                 | Engineered cells                                                                                       | 0.5                                                               | 0 - 1 |        |        |                                                                                                   |                                                                                                                                                   |
| Models & Rescue                                | Animal model                                    | 2                                                                                                      | 0 - 4                                                             | 4     | 2.0    | 2      | Zhong F et al. 2011 Jan 1 (21205863); Mahmoudi S et al. 2010 Nov 2 (21072240) <sup>123; 125</sup> |                                                                                                                                                   |
|                                                | Cell culture model system                       | 1                                                                                                      | 0 - 2                                                             |       |        |        |                                                                                                   |                                                                                                                                                   |
|                                                | Rescue in animal model                          | 2                                                                                                      | 0 - 4                                                             |       |        |        |                                                                                                   |                                                                                                                                                   |
|                                                | Rescue in engineered equivalent                 | 1                                                                                                      | 0 - 2                                                             |       |        |        |                                                                                                   |                                                                                                                                                   |
| Total Experimental Evidence Points (Maximum 6) |                                                 |                                                                                                        |                                                                   |       |        |        | 6                                                                                                 |                                                                                                                                                   |

**Figure S64: Summary of evidence supporting a relationship between WRAP53 and autosomal recessive dyskeratosis congenital.**

| Assertion criteria                      | Genetic Evidence (0-12 points)                                                                 | Experimental Evidence (0-6 points)                                         | Total Points (0-18)                    | Replication Over Time (Y/N)                        |
|-----------------------------------------|------------------------------------------------------------------------------------------------|----------------------------------------------------------------------------|----------------------------------------|----------------------------------------------------|
| <b>Description</b>                      | Case-level, family segregation, or case-control data that support the gene-disease association | Gene-level experimental evidence that support the gene-disease association | Sum of Genetic & Experimental Evidence | > 2 pubs w/ convincing evidence over time (>3 yrs) |
| <b>Assigned Points</b>                  | <b>3.5</b>                                                                                     | <b>6</b>                                                                   | <b>9.5</b>                             | <b>NO</b>                                          |
| <b>CALCULATED CLASSIFICATION</b>        |                                                                                                | <b>LIMITED</b>                                                             | <b>1-6</b>                             |                                                    |
|                                         |                                                                                                | <b>MODERATE</b>                                                            | <b>7-11</b>                            |                                                    |
|                                         |                                                                                                | <b>STRONG</b>                                                              | <b>12-18</b>                           |                                                    |
|                                         |                                                                                                | <b>DEFINITIVE</b>                                                          | <b>12-18 AND replication over time</b> |                                                    |
| Valid contradictory evidence (Y/N)*     | NO                                                                                             |                                                                            |                                        |                                                    |
| <b>CALCULATED CLASSIFICATION (DATE)</b> |                                                                                                | <b>MODERATE</b>                                                            |                                        |                                                    |
| <b>MODIFY CALCULATED CLASSIFICATION</b> |                                                                                                | YES                                                                        |                                        |                                                    |
| <b>CURATOR CLASSIFICATION (DATE)</b>    |                                                                                                | <b>LIMITED</b><br>08/04/2016                                               |                                        |                                                    |
| <b>EXPERT CURATION (DATE)</b>           |                                                                                                | <b>MODERATE</b><br>01/25/2017                                              |                                        |                                                    |

**Figure S65: Summary matrix and classification for *WRAP53* and autosomal recessive dyskeratosis congenital.** This gene/disease relationship was initially classified as limited by the curator. During expert review, the expert added more experimental evidence and it was increased to moderate.

## Supplemental References

1. Takeshita, E., Nakagawa, E., Nakatani, K., Sasaki, M., and Goto, Y. (2012). Novel AGTR2 missense mutation in a Japanese boy with severe mental retardation, pervasive developmental disorder, and epilepsy. *Brain & development* 34, 776-779.
2. Vervoort, V.S., Beachem, M.A., Edwards, P.S., Ladd, S., Miller, K.E., de Mollerat, X., Clarkson, K., DuPont, B., Schwartz, C.E., Stevenson, R.E., et al. (2002). AGTR2 mutations in X-linked mental retardation. *Science* 296, 2401-2403.
3. Pawlowski, T.L., Heringer-Walther, S., Cheng, C.H., Archie, J.G., Chen, C.F., Walther, T., and Srivastava, A.K. (2009). Candidate Agtr2 influenced genes and pathways identified by expression profiling in the developing brain of Agtr2(-/y) mice. *Genomics* 94, 188-195.
4. Maul, B., von Bohlen und Halbach, O., Becker, A., Sterner-Kock, A., Voigt, J.P., Siems, W.E., Grecksch, G., and Walther, T. (2008). Impaired spatial memory and altered dendritic spine morphology in angiotensin II type 2 receptor-deficient mice. *Journal of molecular medicine* 86, 563-571.
5. Richards, S., Aziz, N., Bale, S., Bick, D., Das, S., Gastier-Foster, J., Grody, W.W., Hegde, M., Lyon, E., Spector, E., et al. (2015). Standards and guidelines for the interpretation of sequence variants: a joint consensus recommendation of the American College of Medical Genetics and Genomics and the Association for Molecular Pathology. *Genetics in medicine : official journal of the American College of Medical Genetics* 17, 405-424.
6. Piton, A., Redin, C., and Mandel, J.L. (2013). XLID-causing mutations and associated genes challenged in light of data from large-scale human exome sequencing. *American journal of human genetics* 93, 368-383.
7. Lek, M., Karczewski, K.J., Minikel, E.V., Samocha, K.E., Banks, E., Fennell, T., O'Donnell-Luria, A.H., Ware, J.S., Hill, A.J., Cummings, B.B., et al. (2016). Analysis of protein-coding genetic variation in 60,706 humans. *Nature* 536, 285-291.
8. Chen, L., Marquardt, M.L., Tester, D.J., Sampson, K.J., Ackerman, M.J., and Kass, R.S. (2007). Mutation of an A-kinase-anchoring protein causes long-QT syndrome. *Proceedings of the National Academy of Sciences of the United States of America* 104, 20990-20995.
9. Marx, S.O., Kurokawa, J., Reiken, S., Motoike, H., D'Armiento, J., Marks, A.R., and Kass, R.S. (2002). Requirement of a macromolecular signaling complex for beta adrenergic receptor modulation of the KCNQ1-KCNE1 potassium channel. *Science* 295, 496-499.
10. Kohl, S., Zobor, D., Chiang, W.C., Weisschuh, N., Staller, J., Gonzalez Menendez, I., Chang, S., Beck, S.C., Garcia Garrido, M., Sothilingam, V., et al. (2015). Mutations in the unfolded protein response regulator ATF6 cause the cone dysfunction disorder achromatopsia. *Nature genetics* 47, 757-765.
11. Ansar, M., Santos-Cortez, R.L., Saqib, M.A., Zulfiqar, F., Lee, K., Ashraf, N.M., Ullah, E., Wang, X., Sajid, S., Khan, F.S., et al. (2015). Mutation of ATF6 causes autosomal recessive achromatopsia. *Human genetics* 134, 941-950.
12. Selcen, D., Muntoni, F., Burton, B.K., Pegoraro, E., Sewry, C., Bite, A.V., and Engel, A.G. (2009). Mutation in BAG3 causes severe dominant childhood muscular dystrophy. *Annals of neurology* 65, 83-89.
13. Odgerel, Z., Sarkozy, A., Lee, H.S., McKenna, C., Rankin, J., Straub, V., Lochmuller, H., Paola, F.,

- D'Amico, A., Bertini, E., et al. (2010). Inheritance patterns and phenotypic features of myofibrillar myopathy associated with a BAG3 mutation. *Neuromuscular disorders* : NMD 20, 438-442.
14. Semmler, A.L., Sacconi, S., Bach, J.E., Liebe, C., Burmann, J., Kley, R.A., Ferbert, A., Anderheiden, R., Van den Bergh, P., Martin, J.J., et al. (2014). Unusual multisystemic involvement and a novel BAG3 mutation revealed by NGS screening in a large cohort of myofibrillar myopathies. *Orphanet journal of rare diseases* 9, 121.
  15. Konersman, C.G., Bordini, B.J., Scharer, G., Lawlor, M.W., Zangwill, S., Southern, J.F., Amos, L., Geddes, G.C., Kliegman, R., and Collins, M.P. (2015). BAG3 myofibrillar myopathy presenting with cardiomyopathy. *Neuromuscular disorders* : NMD 25, 418-422.
  16. Kostera-Pruszczyk, A., Suszek, M., Ploski, R., Franaszczyk, M., Potulska-Chromik, A., Pruszczyk, P., Sadurska, E., Karolczak, J., Kaminska, A.M., and Redowicz, M.J. (2015). BAG3-related myopathy, polyneuropathy and cardiomyopathy with long QT syndrome. *Journal of muscle research and cell motility* 36, 423-432.
  17. D'Avila, F., Meregalli, M., Lupoli, S., Barcella, M., Orro, A., De Santis, F., Sitzia, C., Farini, A., D'Urso, P., Erratico, S., et al. (2016). Exome sequencing identifies variants in two genes encoding the LIM-proteins NRAP and FHL1 in an Italian patient with BAG3 myofibrillar myopathy. *Journal of muscle research and cell motility* 37, 101-115.
  18. Jaffer, F., Murphy, S.M., Scoto, M., Healy, E., Rossor, A.M., Brandner, S., Phadke, R., Selcen, D., Jungbluth, H., Muntoni, F., et al. (2012). BAG3 mutations: another cause of giant axonal neuropathy. *Journal of the peripheral nervous system* : JPNS 17, 210-216.
  19. Homma, S., Iwasaki, M., Shelton, G.D., Engvall, E., Reed, J.C., and Takayama, S. (2006). BAG3 deficiency results in fulminant myopathy and early lethality. *The American journal of pathology* 169, 761-773.
  20. Hishiya, A., Kitazawa, T., and Takayama, S. (2010). BAG3 and Hsc70 interact with actin capping protein CapZ to maintain myofibrillar integrity under mechanical stress. *Circulation research* 107, 1220-1231.
  21. McAdam, R.A., Goundis, D., and Reid, K.B. (1988). A homozygous point mutation results in a stop codon in the C1q B-chain of a C1q-deficient individual. *Immunogenetics* 27, 259-264.
  22. Petry, F., Hauptmann, G., Goetz, J., Grosshans, E., and Loos, M. (1997). Molecular basis of a new type of C1q-deficiency associated with a non-functional low molecular weight (LMW) C1q: parallels and differences to other known genetic C1q-defects. *Immunopharmacology* 38, 189-201.
  23. Marquart, H.V., Schejbel, L., Sjöholm, A., Martensson, U., Nielsen, S., Koch, A., Svejgaard, A., and Garred, P. (2007). C1q deficiency in an Inuit family: identification of a new class of C1q disease-causing mutations. *Clinical immunology* 124, 33-40.
  24. Troedson, C., Wong, M., Dalby-Payne, J., Wilson, M., Dexter, M., Rice, G.I., Crow, Y.J., and Dale, R.C. (2013). Systemic lupus erythematosus due to C1q deficiency with progressive encephalopathy, intracranial calcification and acquired moyamoya cerebral vasculopathy. *Lupus* 22, 639-643.
  25. Higuchi, Y., Shimizu, J., Hatanaka, M., Kitano, E., Kitamura, H., Takada, H., Ishimura, M., Hara, T., Ohara, O., Asagoe, K., et al. (2013). The identification of a novel splicing mutation in C1qB in a Japanese family with C1q deficiency: a case report. *Pediatric rheumatology online journal* 11, 41.
  26. van Schaarenburg, R.A., Daha, N.A., Schonkeren, J.J., Nivine Levarht, E.W., van Gijlswijk-Janssen, D.J., Kurreeman, F.A., Roos, A., van Kooten, C., Koelman, C.A., Ernst-Kruis, M.R., et al. (2015).

Identification of a novel non-coding mutation in C1qB in a Dutch child with C1q deficiency associated with recurrent infections. *Immunobiology* 220, 422-427.

27. Miura-Shimura, Y., Nakamura, K., Ohtsuji, M., Tomita, H., Jiang, Y., Abe, M., Zhang, D., Hamano, Y., Tsuda, H., Hashimoto, H., et al. (2002). C1q regulatory region polymorphism down-regulating murine c1q protein levels with linkage to lupus nephritis. *Journal of immunology* 169, 1334-1339.
28. Soudais, C., de Villartay, J.P., Le Deist, F., Fischer, A., and Lisowska-Groszpiere, B. (1993). Independent mutations of the human CD3-epsilon gene resulting in a T cell receptor/CD3 complex immunodeficiency. *Nature genetics* 3, 77-81.
29. de Saint Basile, G., Geissmann, F., Flori, E., Uring-Lambert, B., Soudais, C., Cavazzana-Calvo, M., Durandy, A., Jabado, N., Fischer, A., and Le Deist, F. (2004). Severe combined immunodeficiency caused by deficiency in either the delta or the epsilon subunit of CD3. *The Journal of clinical investigation* 114, 1512-1517.
30. Fuehrer, M., Pannicke, U., Schuetz, C., Jacobsen, E.M., Schulz, A., Friedrich, W., Schwarz, K., and Honig, M. (2014). Successful haploidentical hematopoietic stem cell transplantation in a patient with SCID due to CD3epsilon deficiency: need for IgG-substitution 6 years later. *Klinische Padiatrie* 226, 149-153.
31. Manolios, N., Letourneur, F., Bonifacino, J.S., and Klausner, R.D. (1991). Pairwise, cooperative and inhibitory interactions describe the assembly and probable structure of the T-cell antigen receptor. *The EMBO journal* 10, 1643-1651.
32. Thoenes, G., Soudais, C., le Deist, F., Griscelli, C., Fischer, A., and Lisowska-Groszpiere, B. (1992). Structural analysis of low TCR-CD3 complex expression in T cells of an immunodeficient patient. *The Journal of biological chemistry* 267, 487-493.
33. Wang, B., Biron, C., She, J., Higgins, K., Sunshine, M.J., Lacy, E., Lonberg, N., and Terhorst, C. (1994). A block in both early T lymphocyte and natural killer cell development in transgenic mice with high-copy numbers of the human CD3E gene. *Proceedings of the National Academy of Sciences of the United States of America* 91, 9402-9406.
34. Hwang, D.Y., Dworschak, G.C., Kohl, S., Saisawat, P., Vivante, A., Hilger, A.C., Reutter, H.M., Soliman, N.A., Bogdanovic, R., Kehinde, E.O., et al. (2014). Mutations in 12 known dominant disease-causing genes clarify many congenital anomalies of the kidney and urinary tract. *Kidney international* 85, 1429-1433.
35. Brockschmidt, A., Chung, B., Weber, S., Fischer, D.C., Kolatsi-Joannou, M., Christ, L., Heimbach, A., Shtiza, D., Klaus, G., Simonetti, G.D., et al. (2012). CHD1L: a new candidate gene for congenital anomalies of the kidneys and urinary tract (CAKUT). *Nephrology, dialysis, transplantation : official publication of the European Dialysis and Transplant Association - European Renal Association* 27, 2355-2364.
36. Jurgens, J., Sobreira, N., Modaff, P., Reiser, C.A., Seo, S.H., Seong, M.W., Park, S.S., Kim, O.H., Cho, T.J., and Pauli, R.M. (2015). Novel COL2A1 variant (c.619G>A, p.Gly207Arg) manifesting as a phenotype similar to progressive pseudorheumatoid dysplasia and spondyloepiphyseal dysplasia, Stanescu type. *Human mutation* 36, 1004-1008.
37. Hammarsjo, A., Nordgren, A., Lagerstedt-Robinson, K., Malmgren, H., Nilsson, D., Wedren, S., Nordenskjold, M., Nishimura, G., and Grigelioniene, G. (2016). Pathogenic variant in the COL2A1 gene is associated with Spondyloepiphyseal dysplasia type Stanescu. *American journal of medical genetics Part A* 170A, 266-269.

38. Chan, D., Taylor, T.K., and Cole, W.G. (1993). Characterization of an arginine 789 to cysteine substitution in alpha 1 (II) collagen chains of a patient with spondyloepiphyseal dysplasia. *The Journal of biological chemistry* 268, 15238-15245.
39. Vandenberg, P., Khillan, J.S., Prockop, D.J., Helminen, H., Kontusaari, S., and Ala-Kokko, L. (1991). Expression of a partially deleted gene of human type II procollagen (COL2A1) in transgenic mice produces a chondrodysplasia. *Proceedings of the National Academy of Sciences of the United States of America* 88, 7640-7644.
40. Garofalo, S., Vuorio, E., Metsaranta, M., Rosati, R., Toman, D., Vaughan, J., Lozano, G., Mayne, R., Ellard, J., Horton, W., et al. (1991). Reduced amounts of cartilage collagen fibrils and growth plate anomalies in transgenic mice harboring a glycine-to-cysteine mutation in the mouse type II procollagen alpha 1-chain gene. *Proceedings of the National Academy of Sciences of the United States of America* 88, 9648-9652.
41. Hill, D.A., Ivanovich, J., Priest, J.R., Gurnett, C.A., Dehner, L.P., Desruisseau, D., Jarzembowski, J.A., Wikenheiser-Brokamp, K.A., Suarez, B.K., Whelan, A.J., et al. (2009). DICER1 mutations in familial pleuropulmonary blastoma. *Science* 325, 965.
42. Doros, L., Yang, J., Dehner, L., Rossi, C.T., Skiver, K., Jarzembowski, J.A., Messinger, Y., Schultz, K.A., Williams, G., Andre, N., et al. (2012). DICER1 mutations in embryonal rhabdomyosarcomas from children with and without familial PPB-tumor predisposition syndrome. *Pediatric blood & cancer* 59, 558-560.
43. Stewart, D.R., Messinger, Y., Williams, G.M., Yang, J., Field, A., Schultz, K.A., Harney, L.A., Doros, L.A., Dehner, L.P., and Hill, D.A. (2014). Nasal chondromesenchymal hamartomas arise secondary to germline and somatic mutations of DICER1 in the pleuropulmonary blastoma tumor predisposition disorder. *Human genetics* 133, 1443-1450.
44. Harris, K.S., Zhang, Z., McManus, M.T., Harfe, B.D., and Sun, X. (2006). Dicer function is essential for lung epithelium morphogenesis. *Proceedings of the National Academy of Sciences of the United States of America* 103, 2208-2213.
45. Rousseau, F., Bonaventure, J., Legeai-Mallet, L., Pelet, A., Rozet, J.M., Maroteaux, P., Le Merrer, M., and Munnich, A. (1994). Mutations in the gene encoding fibroblast growth factor receptor-3 in achondroplasia. *Nature* 371, 252-254.
46. Shiang, R., Thompson, L.M., Zhu, Y.Z., Church, D.M., Fielder, T.J., Bocian, M., Winokur, S.T., and Wasmuth, J.J. (1994). Mutations in the transmembrane domain of FGFR3 cause the most common genetic form of dwarfism, achondroplasia. *Cell* 78, 335-342.
47. Naski, M.C., Colvin, J.S., Coffin, J.D., and Ornitz, D.M. (1998). Repression of hedgehog signaling and BMP4 expression in growth plate cartilage by fibroblast growth factor receptor 3. *Development* 125, 4977-4988.
48. Cho, J.Y., Guo, C., Torello, M., Lunstrum, G.P., Iwata, T., Deng, C., and Horton, W.A. (2004). Defective lysosomal targeting of activated fibroblast growth factor receptor 3 in achondroplasia. *Proceedings of the National Academy of Sciences of the United States of America* 101, 609-614.
49. Wang, Y., Spatz, M.K., Kannan, K., Hayk, H., Avivi, A., Gorivodsky, M., Pines, M., Yaron, A., Lonai, P., and Givol, D. (1999). A mouse model for achondroplasia produced by targeting fibroblast growth factor receptor 3. *Proceedings of the National Academy of Sciences of the United States of America* 96, 4455-4460.
50. Au, P.Y., You, J., Caluseriu, O., Schwartzentruber, J., Majewski, J., Bernier, F.P., Ferguson, M., Valle,

- D., Parboosingh, J.S., Sobreira, N., et al. (2015). GeneMatcher aids in the identification of a new malformation syndrome with intellectual disability, unique facial dysmorphisms, and skeletal and connective tissue abnormalities caused by de novo variants in HNRNPK. *Human mutation* 36, 1009-1014.
51. Lange, L., Pagnamenta, A.T., Lise, S., Clasper, S., Stewart, H., Akha, E.S., Quaghebeur, G., Knight, S.J., Keays, D.A., Taylor, J.C., et al. (2016). A de novo frameshift in HNRNPK causing a Kabuki-like syndrome with nodular heterotopia. *Clinical genetics* 90, 258-262.
  52. Fan, X., Xiong, H., Wei, J., Gao, X., Feng, Y., Liu, X., Zhang, G., He, Q.Y., Xu, J., and Liu, L. (2015). Cytoplasmic hnRNP K interacts with GSK3beta and is essential for the osteoclast differentiation. *Scientific reports* 5, 17732.
  53. Gallardo, M., Lee, H.J., Zhang, X., Bueso-Ramos, C., Pagon, L.R., McArthur, M., Multani, A., Nazha, A., Manshouri, T., Parker-Thornburg, J., et al. (2015). hnRNP K Is a Haploinsufficient Tumor Suppressor that Regulates Proliferation and Differentiation Programs in Hematologic Malignancies. *Cancer cell* 28, 486-499.
  54. Radmanesh, F., Caglayan, A.O., Silhavy, J.L., Yilmaz, C., Cantagrel, V., Omar, T., Rosti, B., Kaymakcalan, H., Gabriel, S., Li, M., et al. (2013). Mutations in LAMB1 cause cobblestone brain malformation without muscular or ocular abnormalities. *American journal of human genetics* 92, 468-474.
  55. Lee, J., and Gross, J.M. (2007). Laminin beta1 and gamma1 containing laminins are essential for basement membrane integrity in the zebrafish eye. *Investigative ophthalmology & visual science* 48, 2483-2490.
  56. Sobreira, N., Modaff, P., Steel, G., You, J., Nanda, S., Hoover-Fong, J., Valle, D., and Pauli, R.M. (2015). An anadysplasia-like, spontaneously remitting spondylometaphyseal dysplasia secondary to lamin B receptor (LBR) gene mutations: further definition of the phenotypic heterogeneity of LBR-bone dysplasias. *American journal of medical genetics Part A* 167A, 159-163.
  57. Borovik, L., Modaff, P., Waterham, H.R., Krentz, A.D., and Pauli, R.M. (2013). Pelger-huet anomaly and a mild skeletal phenotype secondary to mutations in LBR. *American journal of medical genetics Part A* 161A, 2066-2073.
  58. Olins, A.L., Rhodes, G., Welch, D.B., Zwerger, M., and Olins, D.E. (2010). Lamin B receptor: multi-tasking at the nuclear envelope. *Nucleus* 1, 53-70.
  59. Zwerger, M., Kolb, T., Richter, K., Karakesisoglou, I., and Herrmann, H. (2010). Induction of a massive endoplasmic reticulum and perinuclear space expansion by expression of lamin B receptor mutants and the related sterol reductases TM7SF2 and DHCR7. *Molecular biology of the cell* 21, 354-368.
  60. Shultz, L.D., Lyons, B.L., Burzenski, L.M., Gott, B., Samuels, R., Schweitzer, P.A., Dreger, C., Herrmann, H., Kalscheuer, V., Olins, A.L., et al. (2003). Mutations at the mouse ichthyosis locus are within the lamin B receptor gene: a single gene model for human Pelger-Huet anomaly. *Human molecular genetics* 12, 61-69.
  61. Bayram, Y., Karaca, E., Coban Akdemir, Z., Yilmaz, E.O., Tayfun, G.A., Aydin, H., Torun, D., Bozdogan, S.T., Gezirici, A., Isikay, S., et al. (2016). Molecular etiology of arthrogyrosis in multiple families of mostly Turkish origin. *The Journal of clinical investigation* 126, 762-778.
  62. Chiergatti, E., Gartner, A., Stoffler, H.E., and Bahler, M. (1998). Myr 7 is a novel myosin IX-RhoGAP expressed in rat brain. *Journal of cell science* 111 ( Pt 24), 3597-3608.



63. Gorman, S.W., Haider, N.B., Grieshammer, U., Swiderski, R.E., Kim, E., Welch, J.W., Searby, C., Leng, S., Carmi, R., Sheffield, V.C., et al. (1999). The cloning and developmental expression of unconventional myosin IXA (MYO9A) a gene in the Bardet-Biedl syndrome (BBS4) region at chromosome 15q22-q23. *Genomics* 59, 150-160.
64. Omelchenko, T., and Hall, A. (2012). Myosin-IXA regulates collective epithelial cell migration by targeting RhoGAP activity to cell-cell junctions. *Current biology* : CB 22, 278-288.
65. Need, A.C., Shashi, V., Hitomi, Y., Schoch, K., Shianna, K.V., McDonald, M.T., Meisler, M.H., and Goldstein, D.B. (2012). Clinical application of exome sequencing in undiagnosed genetic conditions. *Journal of medical genetics* 49, 353-361.
66. Caglayan, A.O., Comu, S., Baranoski, J.F., Parman, Y., Kaymakcalan, H., Akgumus, G.T., Caglar, C., Dolen, D., Erson-Omay, E.Z., Harmanci, A.S., et al. (2015). NGLY1 mutation causes neuromotor impairment, intellectual disability, and neuropathy. *European journal of medical genetics* 58, 39-43.
67. Enns, G.M., Shashi, V., Bainbridge, M., Gambello, M.J., Zahir, F.R., Bast, T., Crimian, R., Schoch, K., Platt, J., Cox, R., et al. (2014). Mutations in NGLY1 cause an inherited disorder of the endoplasmic reticulum-associated degradation pathway. *Genetics in medicine : official journal of the American College of Medical Genetics* 16, 751-758.
68. Bosch, D.G., Boonstra, F.N., de Leeuw, N., Pfundt, R., Nillesen, W.M., de Ligt, J., Gilissen, C., Jhangiani, S., Lupski, J.R., Cremers, F.P., et al. (2016). Novel genetic causes for cerebral visual impairment. *European journal of human genetics* : EJHG 24, 660-665.
69. Heeley, J., and Shinawi, M. (2015). Multi-systemic involvement in NGLY1-related disorder caused by two novel mutations. *American journal of medical genetics Part A* 167A, 816-820.
70. He, P., Grotzke, J.E., Ng, B.G., Gunel, M., Jafar-Nejad, H., Cresswell, P., Enns, G.M., and Freeze, H.H. (2015). A congenital disorder of deglycosylation: Biochemical characterization of N-glycanase 1 deficiency in patient fibroblasts. *Glycobiology* 25, 836-844.
71. Huang, C., Harada, Y., Hosomi, A., Masahara-Negishi, Y., Seino, J., Fujihira, H., Funakoshi, Y., Suzuki, T., Dohmae, N., and Suzuki, T. (2015). Endo-beta-N-acetylglucosaminidase forms N-GlcNAc protein aggregates during ER-associated degradation in Ngly1-defective cells. *Proceedings of the National Academy of Sciences of the United States of America* 112, 1398-1403.
72. Vulliamy, T., Beswick, R., Kirwan, M., Marrone, A., Digweed, M., Walne, A., and Dokal, I. (2008). Mutations in the telomerase component NHP2 cause the premature ageing syndrome dyskeratosis congenita. *Proceedings of the National Academy of Sciences of the United States of America* 105, 8073-8078.
73. Trahan, C., Martel, C., and Dragon, F. (2010). Effects of dyskeratosis congenita mutations in dyskerin, NHP2 and NOP10 on assembly of H/ACA pre-RNPs. *Human molecular genetics* 19, 825-836.
74. Freund, A., Zhong, F.L., Venteicher, A.S., Meng, Z., Veenstra, T.D., Frydman, J., and Artandi, S.E. (2014). Proteostatic control of telomerase function through TRiC-mediated folding of TCAB1. *Cell* 159, 1389-1403.
75. Dez, C., Henras, A., Faucon, B., Lafontaine, D., Caizergues-Ferrer, M., and Henry, Y. (2001). Stable expression in yeast of the mature form of human telomerase RNA depends on its association with the box H/ACA small nucleolar RNP proteins Cbf5p, Nhp2p and Nop10p. *Nucleic acids research* 29, 598-603.

76. Erkko, H., Xia, B., Nikkila, J., Schleutker, J., Syrjakoski, K., Mannermaa, A., Kallioniemi, A., Pylkas, K., Karppinen, S.M., Rapakko, K., et al. (2007). A recurrent mutation in PALB2 in Finnish cancer families. *Nature* 446, 316-319.
77. Heikkinen, T., Karkkainen, H., Aaltonen, K., Milne, R.L., Heikkila, P., Aittomaki, K., Blomqvist, C., and Nevanlinna, H. (2009). The breast cancer susceptibility mutation PALB2 1592delT is associated with an aggressive tumor phenotype. *Clinical cancer research : an official journal of the American Association for Cancer Research* 15, 3214-3222.
78. Casadei, S., Norquist, B.M., Walsh, T., Stray, S., Mandell, J.B., Lee, M.K., Stamatoyannopoulos, J.A., and King, M.C. (2011). Contribution of inherited mutations in the BRCA2-interacting protein PALB2 to familial breast cancer. *Cancer research* 71, 2222-2229.
79. Hartley, T., Cavallone, L., Sabbaghian, N., Silva-Smith, R., Hamel, N., Aleynikova, O., Smith, E., Hastings, V., Pinto, P., Tischkowitz, M., et al. (2014). Mutation analysis of PALB2 in BRCA1 and BRCA2-negative breast and/or ovarian cancer families from Eastern Ontario, Canada. *Hereditary cancer in clinical practice* 12, 19.
80. Janatova, M., Kleibl, Z., Stribrna, J., Panczak, A., Vesela, K., Zimovjanova, M., Kleiblova, P., Dunder, P., Soukupova, J., and Pohlreich, P. (2013). The PALB2 gene is a strong candidate for clinical testing in BRCA1- and BRCA2-negative hereditary breast cancer. *Cancer epidemiology, biomarkers & prevention : a publication of the American Association for Cancer Research, cosponsored by the American Society of Preventive Oncology* 22, 2323-2332.
81. Cybulski, C., Kluzniak, W., Huzarski, T., Wokolorczyk, D., Kashyap, A., Jakubowska, A., Swiec, M., Byrski, T., Debniak, T., Gorski, B., et al. (2015). Clinical outcomes in women with breast cancer and a PALB2 mutation: a prospective cohort analysis. *The Lancet Oncology* 16, 638-644.
82. Xia, B., Sheng, Q., Nakanishi, K., Ohashi, A., Wu, J., Christ, N., Liu, X., Jasin, M., Couch, F.J., and Livingston, D.M. (2006). Control of BRCA2 cellular and clinical functions by a nuclear partner, PALB2. *Molecular cell* 22, 719-729.
83. Bowman-Colin, C., Xia, B., Bunting, S., Klijn, C., Drost, R., Bouwman, P., Fineman, L., Chen, X., Culhane, A.C., Cai, H., et al. (2013). Palb2 synergizes with Trp53 to suppress mammary tumor formation in a model of inherited breast cancer. *Proceedings of the National Academy of Sciences of the United States of America* 110, 8632-8637.
84. Vaz, F., Hanenberg, H., Schuster, B., Barker, K., Wiek, C., Erven, V., Neveling, K., Endt, D., Kesterton, I., Autore, F., et al. (2010). Mutation of the RAD51C gene in a Fanconi anemia-like disorder. *Nature genetics* 42, 406-409.
85. Somyajit, K., Subramanya, S., and Nagaraju, G. (2012). Distinct roles of FANCO/RAD51C protein in DNA damage signaling and repair: implications for Fanconi anemia and breast cancer susceptibility. *The Journal of biological chemistry* 287, 3366-3380.
86. Baker, J.L., Schwab, R.B., Wallace, A.M., and Madlensky, L. (2015). Breast cancer in a RAD51D mutation carrier: case report and review of the literature. *Clinical breast cancer* 15, e71-75.
87. Loveday, C., Turnbull, C., Ramsay, E., Hughes, D., Ruark, E., Frankum, J.R., Bowden, G., Kalmyrzaev, B., Warren-Perry, M., Snape, K., et al. (2011). Germline mutations in RAD51D confer susceptibility to ovarian cancer. *Nature genetics* 43, 879-882.
88. Pelttari, L.M., Kiiski, J., Nurminen, R., Kallioniemi, A., Schleutker, J., Gylfe, A., Aaltonen, L.A., Leminen, A., Heikkila, P., Blomqvist, C., et al. (2012). A Finnish founder mutation in RAD51D: analysis in breast, ovarian, prostate, and colorectal cancer. *Journal of medical genetics* 49, 429-432.

89. Osher, D.J., De Leeneer, K., Michils, G., Hamel, N., Tomiak, E., Poppe, B., Leunen, K., Legius, E., Shuen, A., Smith, E., et al. (2012). Mutation analysis of RAD51D in non-BRCA1/2 ovarian and breast cancer families. *British journal of cancer* 106, 1460-1463.
90. Schild, D., Lio, Y.C., Collins, D.W., Tsomondo, T., and Chen, D.J. (2000). Evidence for simultaneous protein interactions between human Rad51 paralogs. *The Journal of biological chemistry* 275, 16443-16449.
91. Martin, R.W., Orelli, B.J., Yamazoe, M., Minn, A.J., Takeda, S., and Bishop, D.K. (2007). RAD51 up-regulation bypasses BRCA1 function and is a common feature of BRCA1-deficient breast tumors. *Cancer research* 67, 9658-9665.
92. Smiraldo, P.G., Gruver, A.M., Osborn, J.C., and Pittman, D.L. (2005). Extensive chromosomal instability in Rad51d-deficient mouse cells. *Cancer research* 65, 2089-2096.
93. Dowty, J.G., Lose, F., Jenkins, M.A., Chang, J.H., Chen, X., Beesley, J., Dite, G.S., Southey, M.C., Byrnes, G.B., Tesoriero, A., et al. (2008). The RAD51D E233G variant and breast cancer risk: population-based and clinic-based family studies of Australian women. *Breast cancer research and treatment* 112, 35-39.
94. Jara, L., Dubois, K., Gaete, D., de Mayo, T., Ratkevicius, N., Bravo, T., Margarit, S., Blanco, R., Gomez, F., Waugh, E., et al. (2010). Variants in DNA double-strand break repair genes and risk of familial breast cancer in a South American population. *Breast cancer research and treatment* 122, 813-822.
95. Wickramanayake, A., Bernier, G., Pennil, C., Casadei, S., Agnew, K.J., Stray, S.M., Mandell, J., Garcia, R.L., Walsh, T., King, M.C., et al. (2012). Loss of function germline mutations in RAD51D in women with ovarian carcinoma. *Gynecologic oncology* 127, 552-555.
96. Gutierrez-Enriquez, S., Bonache, S., de Garibay, G.R., Osorio, A., Santamarina, M., Ramon y Cajal, T., Esteban-Cardenosa, E., Tenes, A., Yanowsky, K., Barroso, A., et al. (2014). About 1% of the breast and ovarian Spanish families testing negative for BRCA1 and BRCA2 are carriers of RAD51D pathogenic variants. *International journal of cancer* 134, 2088-2097.
97. Doherty, L., Sheen, M.R., Vlachos, A., Choesmel, V., O'Donohue, M.F., Clinton, C., Schneider, H.E., Sieff, C.A., Newburger, P.E., Ball, S.E., et al. (2010). Ribosomal protein genes RPS10 and RPS26 are commonly mutated in Diamond-Blackfan anemia. *American journal of human genetics* 86, 222-228.
98. Smetanina, N.S., Mersiyanova, I.V., Kurnikova, M.A., Ovsyannikova, G.S., Hachatryan, L.A., Bobrynina, V.O., Maschan, M.A., Novichkova, G.A., Lipton, J.M., and Maschan, A.A. (2015). Clinical and genomic heterogeneity of Diamond Blackfan anemia in the Russian Federation. *Pediatric blood & cancer* 62, 1597-1600.
99. Yazaki, M., Kamei, M., Ito, Y., Konno, Y., Wang, R., Toki, T., and Ito, E. (2012). A novel mutation of ribosomal protein S10 gene in a Japanese patient with diamond-Blackfan anemia. *Journal of pediatric hematology/oncology* 34, 293-295.
100. Havugimana, P.C., Hart, G.T., Nepusz, T., Yang, H., Turinsky, A.L., Li, Z., Wang, P.I., Boutz, D.R., Fong, V., Phanse, S., et al. (2012). A census of human soluble protein complexes. *Cell* 150, 1068-1081.
101. Kristensen, A.R., Gsponer, J., and Foster, L.J. (2012). A high-throughput approach for measuring temporal changes in the interactome. *Nature methods* 9, 907-909.

102. Quarello, P., Garelli, E., Carando, A., Brusco, A., Calabrese, R., Dufour, C., Longoni, D., Misuraca, A., Vinti, L., Aspesi, A., et al. (2010). Diamond-Blackfan anemia: genotype-phenotype correlations in Italian patients with RPL5 and RPL11 mutations. *Haematologica* 95, 206-213.
103. Landowski, M., O'Donohue, M.F., Buros, C., Ghazvinian, R., Montel-Lehry, N., Vlachos, A., Sieff, C.A., Newburger, P.E., Niewiadomska, E., Matysiak, M., et al. (2013). Novel deletion of RPL15 identified by array-comparative genomic hybridization in Diamond-Blackfan anemia. *Human genetics* 132, 1265-1274.
104. Gazda, H.T., Grabowska, A., Merida-Long, L.B., Latawiec, E., Schneider, H.E., Lipton, J.M., Vlachos, A., Atsidaftos, E., Ball, S.E., Orfali, K.A., et al. (2006). Ribosomal protein S24 gene is mutated in Diamond-Blackfan anemia. *American journal of human genetics* 79, 1110-1118.
105. Choessel, V., Fribourg, S., Aguisa-Toure, A.H., Pinaud, N., Legrand, P., Gazda, H.T., and Gleizes, P.E. (2008). Mutation of ribosomal protein RPS24 in Diamond-Blackfan anemia results in a ribosome biogenesis disorder. *Human molecular genetics* 17, 1253-1263.
106. Medeiros-Domingo, A., Kaku, T., Tester, D.J., Iturralde-Torres, P., Itty, A., Ye, B., Valdivia, C., Ueda, K., Canizales-Quinteros, S., Tusie-Luna, M.T., et al. (2007). SCN4B-encoded sodium channel beta4 subunit in congenital long-QT syndrome. *Circulation* 116, 134-142.
107. Carmignac, V., Thevenon, J., Ades, L., Callewaert, B., Julia, S., Thauvin-Robinet, C., Gueneau, L., Courcet, J.B., Lopez, E., Holman, K., et al. (2012). In-frame mutations in exon 1 of SKI cause dominant Shprintzen-Goldberg syndrome. *American journal of human genetics* 91, 950-957.
108. Doyle, A.J., Doyle, J.J., Bessling, S.L., Maragh, S., Lindsay, M.E., Schepers, D., Gillis, E., Mortier, G., Homfray, T., Sauls, K., et al. (2012). Mutations in the TGF-beta repressor SKI cause Shprintzen-Goldberg syndrome with aortic aneurysm. *Nature genetics* 44, 1249-1254.
109. van de Laar, I.M., Oldenburg, R.A., Pals, G., Roos-Hesselink, J.W., de Graaf, B.M., Verhagen, J.M., Hoedemaekers, Y.M., Willemsen, R., Severijnen, L.A., Venselaar, H., et al. (2011). Mutations in SMAD3 cause a syndromic form of aortic aneurysms and dissections with early-onset osteoarthritis. *Nature genetics* 43, 121-126.
110. Regalado, E.S., Guo, D.C., Villamizar, C., Avidan, N., Gilchrist, D., McGillivray, B., Clarke, L., Bernier, F., Santos-Cortez, R.L., Leal, S.M., et al. (2011). Exome sequencing identifies SMAD3 mutations as a cause of familial thoracic aortic aneurysm and dissection with intracranial and other arterial aneurysms. *Circulation research* 109, 680-686.
111. van de Laar, I.M., van der Linde, D., Oei, E.H., Bos, P.K., Bessems, J.H., Bierma-Zeinstra, S.M., van Meer, B.L., Pals, G., Oldenburg, R.A., Bekkers, J.A., et al. (2012). Phenotypic spectrum of the SMAD3-related aneurysms-osteoarthritis syndrome. *Journal of medical genetics* 49, 47-57.
112. Verrecchia, F., and Mauviel, A. (2007). Transforming growth factor-beta and fibrosis. *World journal of gastroenterology* 13, 3056-3062.
113. Yang, X., Chen, L., Xu, X., Li, C., Huang, C., and Deng, C.X. (2001). TGF-beta/Smad3 signals repress chondrocyte hypertrophic differentiation and are required for maintaining articular cartilage. *The Journal of cell biology* 153, 35-46.
114. Tan, C.K., Tan, E.H., Luo, B., Huang, C.L., Loo, J.S., Choong, C., and Tan, N.S. (2013). SMAD3 deficiency promotes inflammatory aortic aneurysms in angiotensin II-infused mice via activation of iNOS. *Journal of the American Heart Association* 2, e000269.
115. Karaca, E., Harel, T., Pehlivan, D., Jhangiani, S.N., Gambin, T., Coban Akdemir, Z., Gonzaga-

- Jauregui, C., Erdin, S., Bayram, Y., Campbell, I.M., et al. (2015). Genes that Affect Brain Structure and Function Identified by Rare Variant Analyses of Mendelian Neurologic Disease. *Neuron* 88, 499-513.
116. Lopes, F., Barbosa, M., Ameer, A., Soares, G., de Sa, J., Dias, A.I., Oliveira, G., Cabral, P., Temudo, T., Calado, E., et al. (2016). Identification of novel genetic causes of Rett syndrome-like phenotypes. *Journal of medical genetics* 53, 190-199.
117. Yamamoto, G.L., Aguená, M., Gos, M., Hung, C., Pilch, J., Fahiminiya, S., Abramowicz, A., Cristian, I., Buscarilli, M., Naslavsky, M.S., et al. (2015). Rare variants in *SOS2* and *LZTR1* are associated with Noonan syndrome. *Journal of medical genetics* 52, 413-421.
118. Cordeddu, V., Yin, J.C., Gunnarsson, C., Virtanen, C., Drunat, S., Lepri, F., De Luca, A., Rossi, C., Ciolfi, A., Pugh, T.J., et al. (2015). Activating Mutations Affecting the Dbl Homology Domain of *SOS2* Cause Noonan Syndrome. *Human mutation* 36, 1080-1087.
119. Esteban, L.M., Fernandez-Medarde, A., Lopez, E., Yienger, K., Guerrero, C., Ward, J.M., Tessarollo, L., and Santos, E. (2000). Ras-guanine nucleotide exchange factor *sos2* is dispensable for mouse growth and development. *Molecular and cellular biology* 20, 6410-6413.
120. Taylor, M.R., Slavov, D., Gajewski, A., Vlcek, S., Ku, L., Fain, P.R., Carniel, E., Di Lenarda, A., Sinagra, G., Boucek, M.M., et al. (2005). Thymopoietin (lamina-associated polypeptide 2) gene mutation associated with dilated cardiomyopathy. *Human mutation* 26, 566-574.
121. Horazdovsky, B.F., Cowles, C.R., Mustol, P., Holmes, M., and Emr, S.D. (1996). A novel RING finger protein, *Vps8p*, functionally interacts with the small GTPase, *Vps21p*, to facilitate soluble vacuolar protein localization. *The Journal of biological chemistry* 271, 33607-33615.
122. Epp, N., and Ungermann, C. (2013). The N-terminal domains of *Vps3* and *Vps8* are critical for localization and function of the CORVET tethering complex on endosomes. *PLoS one* 8, e67307.
123. Zhong, F., Savage, S.A., Shkreli, M., Giri, N., Jessop, L., Myers, T., Chen, R., Alter, B.P., and Artandi, S.E. (2011). Disruption of telomerase trafficking by *TCAB1* mutation causes dyskeratosis congenita. *Genes & development* 25, 11-16.
124. Mahmoudi, S., Henriksson, S., Weibrecht, I., Smith, S., Soderberg, O., Stromblad, S., Wiman, K.G., and Farnebo, M. (2010). *WRAP53* is essential for Cajal body formation and for targeting the survival of motor neuron complex to Cajal bodies. *PLoS biology* 8, e1000521.
125. Batista, L.F., Pech, M.F., Zhong, F.L., Nguyen, H.N., Xie, K.T., Zaugg, A.J., Crary, S.M., Choi, J., Sebastiano, V., Cherry, A., et al. (2011). Telomere shortening and loss of self-renewal in dyskeratosis congenita induced pluripotent stem cells. *Nature* 474, 399-402.
