# Supplementary material
Source: PubMed Central journal article supplement (PMC5473734)
Supplement: mmc2.pdf [file mmc2.pdf]

# Evaluating the Clinical Validity of Gene-Disease Associations: An Evidence-Based Framework Developed by the Clinical Genome Resource

Natasha T. Strande,<sup>1,14</sup> Erin Rooney Riggs,<sup>2,14</sup> Adam H. Buchanan,<sup>3</sup> Ozge Ceyhan-Birsoy,<sup>4,5,6,7</sup> Marina DiStefano,<sup>4</sup> Selina S. Dwight,<sup>8</sup> Jenny Goldstein,<sup>1</sup> Rajarshi Ghosh,<sup>9</sup> Bryce A. Seifert,<sup>1</sup> Tam P. Sneddon,<sup>8</sup> Matt W. Wright,<sup>8</sup> Laura V. Milko,<sup>1</sup> J. Michael Cherry,<sup>8</sup> Monica A. Giovanni,<sup>3</sup> Michael F. Murray,<sup>3</sup> Julianne M. O'Daniel,<sup>1</sup> Erin M. Ramos,<sup>10</sup> Avni B. Santani,<sup>11,12</sup> Alan F. Scott,<sup>13</sup> Sharon E. Plon,<sup>9</sup> Heidi L. Rehm,<sup>4,5,6,7</sup> Christa L. Martin,<sup>2,3,\*</sup> and Jonathan S. Berg<sup>1,\*</sup>

With advances in genomic sequencing technology, the number of reported gene-disease relationships has rapidly expanded. However, the evidence supporting these claims varies widely, confounding accurate evaluation of genomic variation in a clinical setting. Despite the critical need to differentiate clinically valid relationships from less well-substantiated relationships, standard guidelines for such evaluation do not currently exist. The NIH-funded Clinical Genome Resource (ClinGen) has developed a framework to define and evaluate the clinical validity of gene-disease pairs across a variety of Mendelian disorders. In this manuscript we describe a proposed framework to evaluate relevant genetic and experimental evidence supporting or contradicting a gene-disease relationship and the subsequent validation of this framework using a set of representative gene-disease pairs. The framework provides a semiquantitative measurement for the strength of evidence of a gene-disease relationship that correlates to a qualitative classification: "Definitive," "Strong," "Moderate," "Limited," "No Reported Evidence," or "Conflicting Evidence." Within the ClinGen structure, classifications derived with this framework are reviewed and confirmed or adjusted based on clinical expertise of appropriate disease experts. Detailed guidance for utilizing this framework and access to the curation interface is available on our website. This evidence-based, systematic method to assess the strength of gene-disease relationships will facilitate more knowledgeable utilization of genomic variants in clinical and research settings.

## Introduction

The human genome comprises approximately 20,000 protein-coding genes (see OMIM website in [Web Resources](#)), of which about 3,000 have been reported in association with at least one Mendelian disease.<sup>1</sup> Roughly half<sup>1</sup> of these gene-disease relationships have been identified over the last decade, as technological advances have made it possible to use sequence information from small families or even single individuals to discover new candidate gene-disease relationships.<sup>2,3</sup> However, there is substantial variability in the level of evidence supporting these claims, and a systematic method for curating and assessing evidence is needed.

Despite this variability, clinical laboratories may include genes with preliminary evidence of a gene-disease relationship on disease-targeted panels or in results returned from exome or genome sequencing. Some of the gene-disease relationships are either unable to be confirmed for many years or are ultimately proven wrong.<sup>4</sup> Evaluating the clinical impact of variants identified in genes with an unclear

role in disease is exceedingly difficult and could lead to incorrect diagnoses, preventing further evaluations and/or resulting in errant management of the affected individual and their families. This scenario highlights the need for a standardized method to evaluate the evidence implicating a gene in disease and thereby determine the clinical validity<sup>2</sup> of a gene-disease relationship.

The NIH-funded Clinical Genome Resource (ClinGen)<sup>5</sup> is creating an open-access resource to better define clinically relevant genes and variants based on standardized, transparent evidence assessment for use in precision medicine and research. Our group has developed a method that (1) qualitatively defines gene-disease clinical validity using a classification scheme based on the strength of evidence supporting the relationship and (2) provides a standardized semiquantitative approach to evaluate available evidence and arrive at such a classification. Currently, this framework is optimized for genes associated with monogenic disorders following autosomal dominant, autosomal-recessive, or X-linked inheritance. Future iterations will expand the framework to consider other modes of

<sup>1</sup>Department of Genetics, School of Medicine, University of North Carolina at Chapel Hill, Chapel Hill, NC 27514, USA; <sup>2</sup>Autism & Developmental Medicine Institute, Geisinger Health System, Danville, PA 17837, USA; <sup>3</sup>Genomic Medicine Institute, Geisinger Health System, Danville, PA 17822, USA; <sup>4</sup>Laboratory for Molecular Medicine, Partners Personalized Medicine, Boston, MA 02139, USA; <sup>5</sup>The Broad Institute of Harvard and MIT, Cambridge, MA 02142, USA; <sup>6</sup>Harvard Medical School, Boston, MA 02115, USA; <sup>7</sup>Department of Pathology, Brigham & Women's Hospital, Boston, MA 02115, USA; <sup>8</sup>Department of Genetics, Stanford University, Stanford, CA 94305, USA; <sup>9</sup>Department of Pediatrics, Baylor College of Medicine, Houston, TX 77030, USA; <sup>10</sup>National Human Genome Research Institute, NIH, Bethesda, MD 20892, USA; <sup>11</sup>Department of Pathology and Laboratory Medicine, Perelman School of Medicine, University of Pennsylvania, Philadelphia, PA 19104, USA; <sup>12</sup>Division of Genomic Diagnostics, Children's Hospital of Philadelphia, Philadelphia, PA 19104, USA; <sup>13</sup>McKusick-Nathans Institute of Genetic Medicine, Johns Hopkins University School of Medicine, Baltimore, MD 21287, USA

<sup>14</sup>These authors contributed equally to this work

\*Correspondence: [clmartin1@geisinger.edu](mailto:clmartin1@geisinger.edu) (C.L.M.), [jonathan\\_berg@med.unc.edu](mailto:jonathan_berg@med.unc.edu) (J.S.B.)

<http://dx.doi.org/10.1016/j.ajhg.2017.04.015>

© 2017 American Society of Human Genetics.

inheritance, such as mitochondrial, and diseases with more complex genomic etiologies, including oligogenic or multifactorial conditions. Our approach is intended to neither define multifactorial disease risk nor to be a substitute for well-established statistical thresholds used for genome-wide association studies.<sup>6,7</sup>

This novel framework classifies gene-disease relationships by the quantity and quality of the evidence supporting such a relationship. It builds on efforts to catalog gene-disease associations, such as the Online Mendelian Inheritance in Man (OMIM) and OrphaNet (see [Web Resources](#)), by systematically organizing the supporting and refuting evidence and then categorizing the strength of evidence supporting these relationships. The resulting clinical validity classifications are valuable to both clinicians and clinical laboratories. First, they provide insight into the strength of clinical associations for clinicians interpreting genetic test results for clinical care. Second, they serve to guide clinical genetic testing laboratories as they develop disease-specific clinical genetic testing panels or interpret genome-scale sequencing tests. By including only those genes with established clinical validity, the possibility of returning ambiguous, incorrect, or uninformative results is reduced, improving the quality of interpretation of genomic data.

## Material and Methods

### Qualitative Description: Clinical Validity Classifications

The ClinGen Gene Curation Working Group (GCWG) is comprised of medical geneticists, clinical laboratory diagnosticians, genetic counselors, and biocurators with broad experience in both clinical and laboratory genetics. Over the course of 3 years, this group convened bi-monthly to develop the described framework for assessing gene-disease clinical validity through expert opinion and working group consensus. We first defined six classes to qualitatively describe the strength of evidence supporting a gene-disease association ([Figure 1](#)). The amount and type of evidence required for each clinical validity classification builds upon that of the previous classification level. Evidence used within this framework to assign a classification to a gene-disease pair is divided into two main types: genetic evidence and experimental evidence (described below). As evidence is likely to change over time, any given classification is representative only of the level of evidence at the time of curation.

The classification “No Reported Evidence” is used for genes that have not yet been asserted to have a causal relationship with a human monogenic disorder but may have some experimental data (e.g., model system data) suggesting a potential role for that gene in disease. The “Limited” classification requires at least one variant, asserted to be disease causing, to have plausible genetic evidence to support the association with human disease with or without gene-level experimental data. “Moderate” classification encompasses additional clinical evidence (e.g., multiple unrelated probands harboring variants with potential roles in disease) and supporting experimental evidence, all of which may be provided by multiple studies or a single robust study. Replication of the gene-disease association in subsequent independent publications and additional substantial genetic and experimental data are crit-

ical factors for the “Strong” classification. Finally, the hallmark of a “Definitive” gene-disease association is that, in addition to the accumulation of convincing genetic and experimental evidence, the relationship has been replicated and ample time has passed since the initial publication (in general, greater than 3 years) for any conflicting evidence to emerge. It is important to highlight that these classifications do not reflect the effect size or relative risk attributable to variants in a particular gene, but instead the strength of the evidence. For example, a definitive gene-disease association does not imply that a pathogenic variant in that gene confers 100% penetrance of the phenotype. This metric is not intended to assess the penetrance or risk to develop a disease outcome.

A gene-disease relationship can be determined to have one of the above classifications provided no substantial relevant and valid contradictory evidence exists to call the gene-disease relationship into question. If such evidence emerges, then the relationship is described as “Conflicting Evidence Reported.” Types of contradictory evidence may come from population studies (such as ExAC<sup>8</sup>), attempts to experimentally validate the gene-disease association, or re-analysis of the original family or cohort that was previously studied. Although the role of a specific *variant* in a given disease may be called into question by new evidence, this may not be sufficient to invalidate the role of the *gene* in that disease. Thorough evaluation by experts in the particular disease area is recommended to determine whether the contradictory evidence outweighs the existing supportive evidence to classify a gene into either a “Disputed” or “Refuted” category (see [Figure 1](#) for additional details).

### Semi-Quantitative Assessment of Evidence

Assigning a clinical validity classification to a gene-disease pair requires assessment of the evidence supporting the association. We developed a semiquantitative approach to evaluate both genetic ([Figure 2](#)) and experimental ([Figure 3](#)) evidence in a standardized manner that promotes consistent collection and weighting of evidence (a detailed standard operating procedure is available on the ClinGen website; see [Web Resources](#)). Development of the quantitative aspect of this framework was based on the qualitative descriptions outlined in [Figure 1](#). Both the qualitative classifications and their quantitative counterparts were determined by consensus of the ClinGen Gene Curation Working Group members comprised of a diverse group of genetics experts and professionals with additional input from experts in multiple clinical domains. Throughout development of the framework, several gene-disease pairs (see [Table 1](#)) were iteratively curated as benchmarks with a known “anticipated classification” to determine appropriate scores and assigned ranges (e.g., *FGFR3* [MIM: 134934]:achondroplasia [MIM: 100800]).

Defined sub-categories of genetic and experimental evidence are given a suggested default “score.” However, given that evidence of the same general type may vary in its strength (particularly when considering different diseases), the scoring system also allows these scores to be adjusted within a set range of points, with final approval by experts within the particular disease domain. Finally, the maximum number of points allowed for the various types of genetic and experimental evidence is capped to prevent a preponderance of weak evidence from inappropriately inflating the gene-disease classification. Similarly, certain evidence categories are provided higher maximum scores, allowing key pieces of stronger evidence to proportionately influence the classification of a gene-disease pair.

| Evidence Level                                                                                                                                                                                                                                                                                                                                                                                             |                               | Evidence Description                                                                                                                                                                                                                                                                                                                                                                                                                                                                                                                                                                                                                                                                                                                                                                                                                                                                                                                                                                                                                                                                                                                                          |
|------------------------------------------------------------------------------------------------------------------------------------------------------------------------------------------------------------------------------------------------------------------------------------------------------------------------------------------------------------------------------------------------------------|-------------------------------|---------------------------------------------------------------------------------------------------------------------------------------------------------------------------------------------------------------------------------------------------------------------------------------------------------------------------------------------------------------------------------------------------------------------------------------------------------------------------------------------------------------------------------------------------------------------------------------------------------------------------------------------------------------------------------------------------------------------------------------------------------------------------------------------------------------------------------------------------------------------------------------------------------------------------------------------------------------------------------------------------------------------------------------------------------------------------------------------------------------------------------------------------------------|
| Supportive Evidence                                                                                                                                                                                                                                                                                                                                                                                        | DEFINITIVE                    | The role of this gene in this particular disease has been repeatedly demonstrated in both the research and clinical diagnostic settings, and has been upheld over time (in general, at least 3 years). No convincing evidence has emerged that contradicts the role of the gene in the specified disease.                                                                                                                                                                                                                                                                                                                                                                                                                                                                                                                                                                                                                                                                                                                                                                                                                                                     |
|                                                                                                                                                                                                                                                                                                                                                                                                            | STRONG                        | The role of this gene in disease has been independently demonstrated typically in at least two separate studies providing <b>strong</b> supporting evidence for this gene's role in disease, usually including both of the following types of evidence: <ul style="list-style-type: none"> <li>• Strong variant-level evidence demonstrating numerous unrelated probands with variants that provide convincing evidence for disease causality<sup>1</sup> <b>as well as</b></li> <li>• Compelling gene-level evidence from different types of supporting experimental data<sup>2</sup>.</li> </ul> In addition, no convincing evidence has emerged that contradicts the role of the gene in the noted disease.                                                                                                                                                                                                                                                                                                                                                                                                                                                |
|                                                                                                                                                                                                                                                                                                                                                                                                            | MODERATE                      | There is <b>moderate</b> evidence to support a causal role for this gene in this disease, typically including both of the following types of evidence: <ul style="list-style-type: none"> <li>• Several probands with variants that provide convincing evidence for disease causality<sup>1</sup></li> <li>• Moderate experimental data<sup>2</sup> supporting the gene-disease association</li> </ul> The role of this gene in disease may not have been independently reported, but no convincing evidence has emerged that contradicts the role of the gene in the noted disease.                                                                                                                                                                                                                                                                                                                                                                                                                                                                                                                                                                          |
|                                                                                                                                                                                                                                                                                                                                                                                                            | LIMITED                       | There is <b>limited</b> evidence to support a causal role for this gene in this disease, such as: <ul style="list-style-type: none"> <li>• Fewer than three observations of variants that provide convincing evidence for disease causality<sup>1</sup> OR</li> <li>• Variants have been observed in probands, but none have sufficient evidence for disease causality.</li> <li>• Limited experimental data<sup>2</sup> supporting the gene-disease association</li> </ul> The role of this gene in disease may not have been independently reported, but no convincing evidence has emerged that contradicts the role of the gene in the noted disease.                                                                                                                                                                                                                                                                                                                                                                                                                                                                                                     |
| NO REPORTED EVIDENCE                                                                                                                                                                                                                                                                                                                                                                                       |                               | Evidence for a causal role in disease has not been reported. These genes might be "candidate" genes based on linkage intervals, animal models, implication in pathways known to be involved in human diseases, etc., but no reports have directly implicated the gene in human disease cases.                                                                                                                                                                                                                                                                                                                                                                                                                                                                                                                                                                                                                                                                                                                                                                                                                                                                 |
| Contradictory Evidence                                                                                                                                                                                                                                                                                                                                                                                     | CONFLICTING EVIDENCE REPORTED | Although there has been an assertion of a gene-disease association, conflicting evidence for the role of this gene in disease has arisen since the time of the initial report indicating a disease association. Depending on the quantity and quality of evidence disputing the association, the association may be further defined by the following two sub-categories: <ol style="list-style-type: none"> <li><b>1. Disputed</b> <ol style="list-style-type: none"> <li>a. Convincing evidence <i>disputing</i> a role for this gene in this disease has arisen since the initial report identifying an association between the gene and disease.</li> <li>b. Refuting evidence need not outweigh existing evidence supporting the gene:disease association.</li> </ol> </li> <li><b>2. Refuted</b> <ol style="list-style-type: none"> <li>a. Evidence refuting the role of the gene in the specified disease has been reported and significantly outweighs any evidence supporting the role.</li> <li>b. This designation is to be applied at the discretion of clinical domain experts after thorough review of available evidence</li> </ol> </li> </ol> |
| NOTES                                                                                                                                                                                                                                                                                                                                                                                                      |                               |                                                                                                                                                                                                                                                                                                                                                                                                                                                                                                                                                                                                                                                                                                                                                                                                                                                                                                                                                                                                                                                                                                                                                               |
| <sup>1</sup> Variants that disrupt function and/or have other strong genetic and population data (e.g. <i>de novo</i> occurrence, absence in controls, strong linkage to a small genomic interval, etc.) are considered convincing of disease causality in this framework.<br><sup>2</sup> Examples of appropriate types of supporting experimental data based on those outlined in MacArthur et al. 2014. |                               |                                                                                                                                                                                                                                                                                                                                                                                                                                                                                                                                                                                                                                                                                                                                                                                                                                                                                                                                                                                                                                                                                                                                                               |

**Figure 1. ClinGen Clinical Validity Classifications and Qualitative Descriptions**

The suggested minimum criteria needed to obtain a given classification are described for each clinical validity classification. The types of evidence comprising these criteria are described in the text. The default classification for genes without a convincing human disease-causing variant is "No Reported Evidence." The level of evidence needed for each supportive gene-disease association category builds upon the previous category (e.g., "Limited" builds upon "Moderate"). Gene-disease associations classified as "Contradictory" likely have supporting evidence as well as opposing evidence, but are described separately from the classifications for supportive gene-disease associations.

|                                                                                                                                                                                                                                                                                                                                                                                                                                                                                                                                                                                                                                                                                                                                                                                                                                                                                               | Evidence Type                            |                                                                                                                           | Case Information                                                               |                        | Suggested Points/Case |              | Points Given | Max Score |
|-----------------------------------------------------------------------------------------------------------------------------------------------------------------------------------------------------------------------------------------------------------------------------------------------------------------------------------------------------------------------------------------------------------------------------------------------------------------------------------------------------------------------------------------------------------------------------------------------------------------------------------------------------------------------------------------------------------------------------------------------------------------------------------------------------------------------------------------------------------------------------------------------|------------------------------------------|---------------------------------------------------------------------------------------------------------------------------|--------------------------------------------------------------------------------|------------------------|-----------------------|--------------|--------------|-----------|
|                                                                                                                                                                                                                                                                                                                                                                                                                                                                                                                                                                                                                                                                                                                                                                                                                                                                                               |                                          |                                                                                                                           |                                                                                |                        | Default               | Range        |              |           |
| Case-Level Data <sup>A</sup>                                                                                                                                                                                                                                                                                                                                                                                                                                                                                                                                                                                                                                                                                                                                                                                                                                                                  | Variant Evidence                         | Autosomal Dominant OR X-Linked Disorder <sup>B</sup>                                                                      | Variant is <i>de novo</i> <sup>C</sup>                                         |                        | 2                     | 0-3          |              | 12        |
|                                                                                                                                                                                                                                                                                                                                                                                                                                                                                                                                                                                                                                                                                                                                                                                                                                                                                               |                                          |                                                                                                                           | Proband with predicted or proven null variant <sup>D</sup>                     |                        | 1.5                   | 0-2          |              | 10        |
|                                                                                                                                                                                                                                                                                                                                                                                                                                                                                                                                                                                                                                                                                                                                                                                                                                                                                               |                                          |                                                                                                                           | Proband with other variant type with some evidence of gene impact <sup>E</sup> |                        | 0.5                   | 0-1.5        |              | 7         |
|                                                                                                                                                                                                                                                                                                                                                                                                                                                                                                                                                                                                                                                                                                                                                                                                                                                                                               | Autosomal Recessive                      | Two variants in <i>trans</i> and at least one <i>de novo</i> <sup>C</sup> or a predicted/proven null variant <sup>D</sup> |                                                                                | 2                      | 0-3                   |              | 12           |           |
|                                                                                                                                                                                                                                                                                                                                                                                                                                                                                                                                                                                                                                                                                                                                                                                                                                                                                               |                                          | Two variants (not predicted/proven null) with some evidence of gene impact <sup>E</sup> in <i>trans</i>                   |                                                                                | 1                      | 0-1.5                 |              |              |           |
|                                                                                                                                                                                                                                                                                                                                                                                                                                                                                                                                                                                                                                                                                                                                                                                                                                                                                               | Segregation <sup>F</sup> Evidence        | Evidence of segregation in one or more families                                                                           | LOD Score Examples                                                             | 3                      | 5                     | 0-7          |              | 7         |
|                                                                                                                                                                                                                                                                                                                                                                                                                                                                                                                                                                                                                                                                                                                                                                                                                                                                                               |                                          | 2                                                                                                                         |                                                                                | 4                      |                       |              |              |           |
|                                                                                                                                                                                                                                                                                                                                                                                                                                                                                                                                                                                                                                                                                                                                                                                                                                                                                               |                                          | 1.5                                                                                                                       |                                                                                | 3                      |                       |              |              |           |
|                                                                                                                                                                                                                                                                                                                                                                                                                                                                                                                                                                                                                                                                                                                                                                                                                                                                                               |                                          | 1                                                                                                                         |                                                                                | 1.5                    |                       |              |              |           |
| Case-Control Data <sup>G</sup>                                                                                                                                                                                                                                                                                                                                                                                                                                                                                                                                                                                                                                                                                                                                                                                                                                                                | Case-Control Study Type <sup>H</sup>     | Case-Control Quality Criteria <sup>I</sup>                                                                                |                                                                                | Suggested Points/Study |                       | Points Given | Max Score    |           |
|                                                                                                                                                                                                                                                                                                                                                                                                                                                                                                                                                                                                                                                                                                                                                                                                                                                                                               | Single Variant Analysis <sup>Ha</sup>    | • Variant Detection Methodology <sup>Ia</sup><br>• Power <sup>Ib</sup>                                                    |                                                                                | 0-6                    |                       |              | 12           |           |
|                                                                                                                                                                                                                                                                                                                                                                                                                                                                                                                                                                                                                                                                                                                                                                                                                                                                                               | Aggregate Variant Analysis <sup>Hb</sup> | • Bias and Confounding Factors <sup>Ic</sup><br>• Statistical Significance <sup>Id</sup>                                  |                                                                                | 0-6                    |                       |              |              |           |
| <b>TOTAL ALLOWABLE POINTS for Genetic Evidence</b>                                                                                                                                                                                                                                                                                                                                                                                                                                                                                                                                                                                                                                                                                                                                                                                                                                            |                                          |                                                                                                                           |                                                                                |                        |                       |              | <b>12</b>    |           |
| <b>General Notes</b> <ul style="list-style-type: none"> <li>• Detailed guidance for utilizing this scoring matrix is available on the ClinGen website in the standard operating procedure.</li> <li>• All variants under consideration should be rare enough in the general population to be consistent with disease.</li> <li>• Cohorts/cases should not be double counted. For example, individual cases included as part of case-control studies should not be given points from both the "Case Level Data" and "Case-Control Data" categories.</li> <li>• Case-Level Data includes studies describing individuals or families with variation in the gene of interest.</li> <li>• Case-Control studies are those in which statistical analysis is used to evaluate variation in cases compared to controls.</li> <li>• Footnotes A-I are explained in the legend for Figure S2.</li> </ul> |                                          |                                                                                                                           |                                                                                |                        |                       |              |              |           |

**Figure 2. Classes of Genetic Evidence and Their Relative Weights Used in the ClinGen Clinical Validity Framework**

For additional points to consider when scoring genetic evidence, please see the standard operating procedure document available on our website. Genetic evidence is separated into two main categories: case-level data and case-control data. While a single publication may include both case-level and case-control data, individual cases should NOT be included in both categories. Each category is assigned a range of points with a maximum score that can be achieved. Case-level data are derived from studies describing individuals and/or families with qualifying variants in the gene of interest. Points should be assigned to each case based on the variant's inheritance pattern, molecular consequence, and evidence of pathogenicity in disease. In addition to variant evidence points, a gene-disease pair may also receive points for compelling segregation analysis (see Figure S1). Case-Control Data: Studies utilizing statistical analysis to evaluate variants in case subjects compared to control subjects. Case-control studies can be classified as either single-variant analysis or aggregate variant analysis, but the number of points allowable for either category is the same. Points should be assigned according to the overall quality of each study based on these criteria: variant detection methodology, power, bias and confounding factors, and statistical power. Note that the maximum total scores allowed for different types of case-level data are not intended to add up to the total points allowed for genetic evidence as a whole. This permits different combinations of evidence types to achieve the maximum total score.

### Genetic Evidence

For the purposes of scoring, genetic evidence is divided into two categories: case-level data and case-control data (Figure 2). Studies describing individuals or families with genetic variants are scored as case-level data, while studies using statistical analyses to compare variants in case and control subjects are scored as case-control data. When case-level and case-control data are present in a single publication, points can be assigned in each category, but the same piece of evidence should not be counted more

than once. For example, an individual case that is also included within a case-control cohort should not be given points in both the "case-level data" and "case-control data" categories. In this scenario, points should be assigned to the most compelling and informative evidence.

Assessing case-level data requires consideration of the inheritance pattern and evaluation of the individual variants identified in each case. Within this framework, a case should be counted toward supporting evidence only if the reported variant has some

| Evidence Category                                       | Evidence Type                   | Suggested Points |       | Points Given | Max Score |
|---------------------------------------------------------|---------------------------------|------------------|-------|--------------|-----------|
|                                                         |                                 | Default          | Range |              |           |
| Function                                                | Biochemical Function            | 0.5              | 0-2   |              | 2         |
|                                                         | Protein Interaction             |                  | 0-2   |              |           |
|                                                         | Expression                      |                  | 0-2   |              |           |
| Functional Alteration                                   | Cells from affected individual  | 1                | 0-2   |              | 2         |
|                                                         | Engineered cells                | 0.5              | 0-1   |              |           |
| Models & Rescue                                         | Animal model                    | 2                | 0-4   |              | 4         |
|                                                         | Cell culture model system       | 1                | 0-2   |              |           |
|                                                         | Rescue in animal model          | 2                | 0-4   |              |           |
|                                                         | Rescue in engineered equivalent | 1                | 0-2   |              |           |
| <b>Total Allowable Points for Experimental Evidence</b> |                                 |                  |       |              | <b>6</b>  |

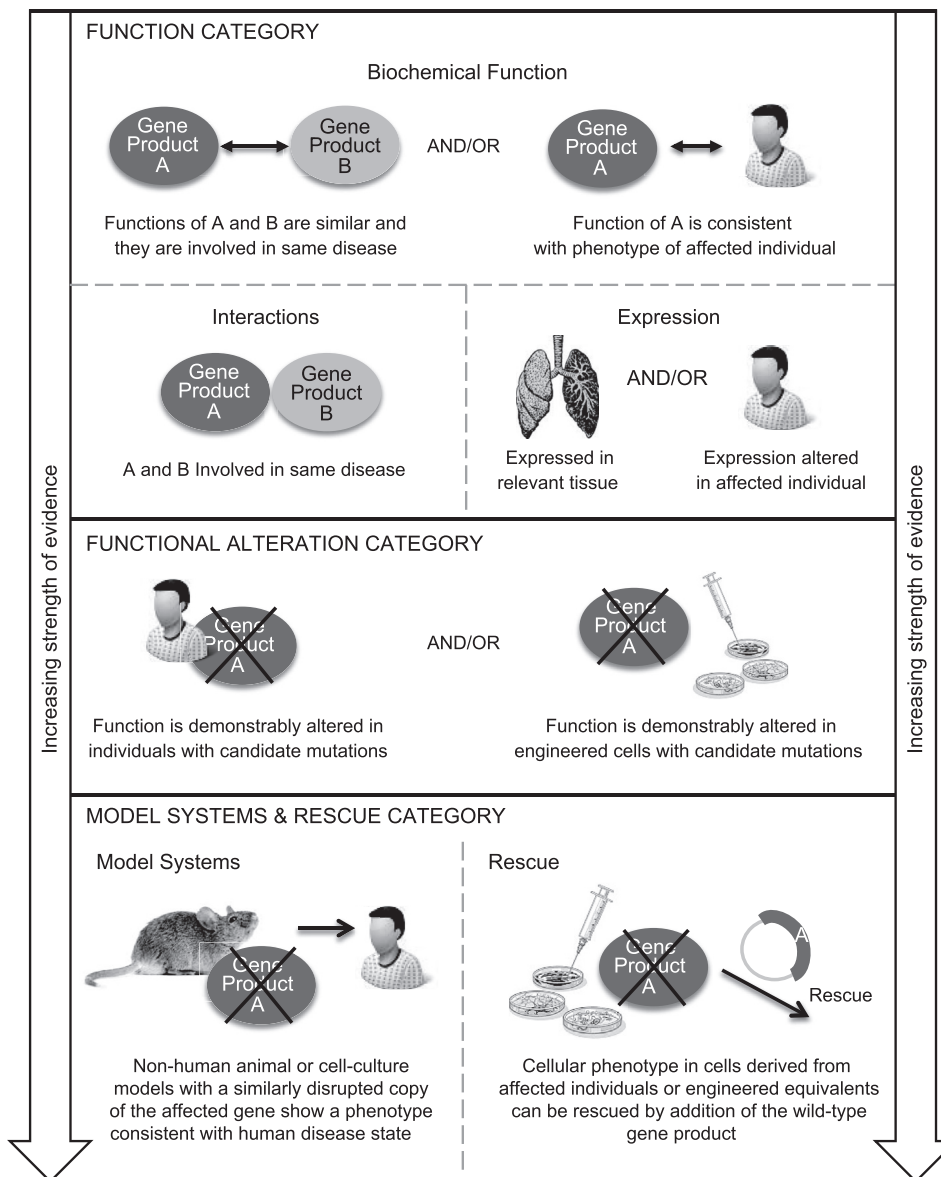

**Figure 3. Types of Gene-Level Experimental Evidence and Their Relative Weights Used in the ClinGen Clinical Validity Framework** Experimental evidence types used in the ClinGen gene curation framework are modified from MacArthur et al.<sup>9</sup> Evidence types are divided into three categories based on their relative contribution to the overall clinical validity of a gene-disease pair, giving more weight to in vivo data. Each category is assigned a range of points with a maximum score that can be achieved, allowing more weight to be given

(legend continued on next page)



indication of a potential role in disease (e.g., impact on gene function, recurrence in affected individuals, etc.), does not have evidence that would contradict pathogenicity (e.g., population allele frequency), and is of the type consistent with the assumed disease mechanism (e.g., truncating variant for loss of function). Unless otherwise noted, the term “qualifying variant” implies that these criteria are met. In addition, points are assigned separately for segregation data to reflect the statistical probability that the locus is implicated in the disease. [Figures 2](#) and [S1](#) provide guidance on the number of points that should be considered for segregation evidence by LOD score; if a LOD score is not provided within the publication being evaluated, an estimated LOD score may be calculated in certain scenarios, as described in the standard operating procedure document provided on the ClinGen website.

Each study categorized as “case-control data” should be independently assessed to evaluate the quality of the study design (see [Figure 2](#)). Consultation with a clinical domain expert group (such as those affiliated with ClinGen) is recommended. For the purposes of this framework, studies are classified based on whether they include single-variant analysis or aggregate variant analysis. Single-variant analyses are those in which individual variants are evaluated for statistical enrichment in case subject compared to control subjects. More than one variant may be analyzed, but the variants have been independently assessed with appropriate statistical correction for multiple testing. Aggregate variant analyses are those in which the total number of variants is assessed for enrichment in case subjects compared with control subjects. This comparison is typically accomplished by sequencing the entire gene in both case and control subjects and demonstrating an increased “burden” of variants of one or more types.

#### **Experimental Evidence**

The experimental data scoring system is presented in [Figure 3](#). The gene-level experimental data used in this framework to assess a gene-disease association are consistent with those proposed by MacArthur and colleagues to implicate a gene in disease.<sup>9</sup> The following experimental evidence types are used: biochemical function, experimental protein interactions, expression, functional alteration, phenotypic rescue, and model systems ([Figure 3](#), bottom). These categories capture the most relevant types of experimental information necessary to determine whether the function of the gene product is at least consistent with the disease with which it is associated, if not causally implicated.

#### **Contradictory Evidence**

While curators are encouraged to seek out and document (via qualitative description) conflicting evidence, no specific points are assigned to this category. The types of valid contradictory evidence and their relative weights will be unique to each gene-disease pair, and it would be misleading to attempt to uniformly quantify this type of negative evidence against the reported positive evidence. If there is substantial conflicting evidence, manual review and expert input is required to evaluate the strength of the contradictory evidence, determine whether it outweighs any available supporting evidence, and, if so, decide whether the gene-disease association should be classified as “Disputed” or “Refuted.”

#### **Summary and Final Matrix**

The scores assigned to both genetic and experimental evidence are tallied to generate a total score (ranging from 1 to 18) that corresponds to a preliminary clinical validity classification ([Figure 4](#)). The system provides a transparent method for summarizing and assessing all curated evidence for a gene-disease pair, encouraging consistency between curators. While the summary matrix facilitates a preliminary assessment of the gene-disease relationship, the initial curator or expert reviewer may adjust the classification, supplying a specific rationale for the change. Final classifications are determined in collaboration with disease experts, who review the preliminary classification and supporting evidence and work to come to a consensus with the preliminary curators. In the event that the disease experts and preliminary curators disagree on a final classification, a senior member of the ClinGen Gene Curation Working Group may be brought in to facilitate a final classification, erring toward the more conservative classification if consensus cannot be achieved. It should be noted that experimental data alone cannot justify a clinical validity classification beyond “No Reported Evidence,” and at least one human genetic variant with a plausible causal association must be present to attain “Limited” classification. The difference between “Limited,” “Moderate,” and “Strong” gene-disease classifications is justified by the quality and quantity of evidence; it is expected that valid gene-disease associations will gradually accumulate enough supporting evidence and be replicated over time to attain a “definitive” classification. This framework relies predominantly on evidence obtained from published primary literature, identified through resources such as PubMed and OMIM (see [Web Resources](#)), and independently assessed by curators; however, if necessary, unpublished information available from publicly accessible resources, such as variant databases,<sup>10,11</sup> may be used as long as some supporting evidence is provided.

## **Results**

With this framework, we evaluated 33 gene-disease pairs representing a variety of disease domains and spanning the spectrum of clinical validity classifications (see [Table 1](#)). These pairs were intentionally chosen to be representative of the diversity in monogenic disorders with regards to inheritance patterns, disease prevalence, and levels of evidence to support a relationship. To assess the reproducibility of our scoring metric, each gene-disease pair was evaluated by two independent curators; paired curators reached concordant clinical validity classifications in 29 of the 31 (93.5%) gene-disease pairs with available published evidence ([Figure 5](#); associations classified as “No Reported Evidence” were excluded). All major discrepancies between curators were discussed and resolved when possible prior to review by clinical domain experts (either ClinGen Clinical Domain Working Group [CDWG] members or ad hoc disease experts mentioned

---

to in vivo data (e.g., Models & Rescue) over in vitro experimental data. Evidence within the function category is given the least weight and is comprised of the following types of evidence: biochemical function, interactions, and expression. Functional alteration experiments in cells from affected individuals carrying candidate pathogenic variants are given more weight than the function category. Finally, model systems and phenotypic rescue experiments are given the most weight in our framework. Note that the maximum total scores allowed for different categories of experimental evidence are not intended to add up to the total allowable points. This permits different combinations of evidence types to achieve the maximum total score.

**Table 1. Categorization of Gene-Disease Pairs Used to Validate the Gene-Validity Framework**

| <b>Disease Category</b>  | <b>HGNC Gene Symbol</b> | <b>Gene MIM ID</b> | <b>Disease Curated</b>                                                   | <b>Inheritance Pattern</b> | <b>Orphanet ID, Phenotype MIM ID</b> | <b>Expert Reviewed Classification<sup>a</sup></b> |
|--------------------------|-------------------------|--------------------|--------------------------------------------------------------------------|----------------------------|--------------------------------------|---------------------------------------------------|
| Bone marrow failure      | <i>NHP2</i>             | 606470             | dyskeratosis congenita                                                   | recessive                  | ORPHA1775, MIM: 613987               | limited                                           |
|                          | <i>RAD51C</i>           | 602774             | Fanconi anemia                                                           | recessive                  | ORPHA84, MIM: 613390                 | moderate                                          |
|                          | <i>RPS10</i>            | 603632             | Diamond-Blackfan anemia                                                  | dominant                   | ORPHA124, MIM: 613308                | definitive                                        |
|                          | <i>RPS24</i>            | 602412             | Diamond-Blackfan anemia                                                  | dominant                   | ORPHA124, MIM: 610629                | definitive                                        |
|                          | <i>TSR2</i>             | 300945             | Diamond-Blackfan anemia with mandibulofacial dysostosis                  | X-linked                   | ORPHA124, MIM: 300946                | limited                                           |
|                          | <i>WRAP53</i>           | 612661             | dyskeratosis congenita                                                   | recessive                  | ORPHA1775, MIM: 613988               | moderate                                          |
| Cardiovascular disorders | <i>AKAP9</i>            | 604001             | Romano-Ward syndrome                                                     | dominant                   | ORPHA101016, MIM: 611820             | limited                                           |
|                          | <i>SCN4B</i>            | 608256             | long QT syndrome                                                         | dominant                   | ORPHA768, MIM: 611819                | limited                                           |
|                          | <i>SMAD3</i>            | 603109             | Loeys-Dietz type 3                                                       | dominant                   | ORPHA284984, MIM: 613795             | definitive                                        |
|                          | <i>TMPO</i>             | 188380             | familial or idiopathic dilated cardiomyopathy                            | dominant                   | ORPHA154, MIM: 613740 <sup>b</sup>   | contradictory (refuted)                           |
| Hereditary cancer        | <i>DICER1</i>           | 606241             | pleuropulmonary blastoma                                                 | dominant                   | ORPHA64742, MIM: 601200              | definitive                                        |
|                          | <i>PALB2</i>            | 610355             | hereditary breast cancer                                                 | dominant                   | ORPHA227535, MIM: 114480             | definitive                                        |
|                          | <i>PMS2</i>             | 600259             | hereditary pancreatic cancer                                             | N/A                        | N/A                                  | no reported evidence                              |
|                          | <i>RAD51D</i>           | 602954             | hereditary breast cancer                                                 | dominant                   | ORPHA227535, MIM: 614291             | limited                                           |
| Immune disorders         | <i>C1QB</i>             | 120570             | immunodeficiency due to C1Q deficiency                                   | recessive                  | ORPHA169147, MIM: 613652             | definitive                                        |
|                          | <i>CD3E</i>             | 186830             | severe combined immunodeficiency                                         | recessive                  | ORPHA183660, MIM: 615615             | definitive                                        |
| Skeletal dysplasia       | <i>ARSD</i>             | 300002             | chondrodysplasia punctata                                                | N/A                        | N/A                                  | no reported evidence                              |
|                          | <i>COL2A1</i>           | 120140             | spondyloepiphyseal dysplasia (Stanescu type)                             | dominant                   | ORPHA94068, MIM: 616583              | moderate                                          |
|                          | <i>FGFR3</i>            | 134934             | achondroplasia                                                           | dominant                   | ORPHA15, MIM: 100800                 | definitive                                        |
|                          | <i>LBR</i>              | 600024             | anadysplasia-like, spontaneously remitting spondylometaphyseal dysplasia | recessive                  | ORPHA448267, none                    | moderate                                          |
| Neuromuscular disorders  | <i>BAG3</i>             | 603883             | myofibrillar myopathy                                                    | dominant                   | ORPHA593, MIM: 612954                | definitive                                        |
|                          | <i>MYO9A</i>            | 604875             | arthrogryposis                                                           | recessive                  | ORPHA109007, none                    | limited                                           |
|                          | <i>PSD3</i>             | 614440             | antecubital pterygium syndrome                                           | dominant                   | ORPHA2987, none                      | limited                                           |
|                          | <i>VPS8</i>             | N/A                | arthrogryposis                                                           | recessive                  | ORPHA109007, none                    | limited                                           |

(Continued on next page)

**Table 1. Continued**

| Disease Category | HGNC Gene Symbol | Gene MIM ID | Disease Curated                                                   | Inheritance Pattern | Orphanet ID, Phenotype MIM ID | Expert Reviewed Classification <sup>a</sup> |
|------------------|------------------|-------------|-------------------------------------------------------------------|---------------------|-------------------------------|---------------------------------------------|
| Miscellaneous    | <i>AGTR2</i>     | 300034      | X-linked non-syndromic intellectual disability                    | X-linked            | ORPHA777, none                | contradictory (disputed)                    |
|                  | <i>ATF6</i>      | 605537      | achromatopsia                                                     | recessive           | ORPHA49382, MIM: 616517       | strong                                      |
|                  | <i>CHD1L</i>     | 613039      | renal or urinary tract malformation                               | dominant            | ORPHA93545, none              | limited                                     |
|                  | <i>HNRNPK</i>    | 600712      | Au-Kline syndrome                                                 | dominant            | ORPHA453504, MIM: 616580      | moderate                                    |
|                  | <i>LAMB1</i>     | 150240      | lissencephaly 5                                                   | recessive           | ORPHA352682, MIM: 615191      | moderate                                    |
|                  | <i>NGLY1</i>     | 610661      | x                                                                 | recessive           | ORPHA404454, MIM: 615273      | definitive                                  |
|                  | <i>SMARCA1</i>   | 300012      | syndromic intellectual disability with Coffin-Syris-like features | dominant            | none, none                    | moderate                                    |
|                  | <i>SKI</i>       | 164780      | Shprintzen-Goldberg                                               | dominant            | ORPHA311140, MIM: 182212      | definitive                                  |
|                  | <i>SOS2</i>      | 601247      | Noonan syndrome                                                   | dominant            | ORPHA648, MIM: 616559         | moderate                                    |

Abbreviations: N/A, not applicable.

<sup>a</sup>All gene-disease classifications are accurate as of January 2017.

<sup>b</sup>Phenotype MIM was associated with *TMPO* at the time of curation, but has since been removed due to updated information.

in the [Acknowledgments](#)); experts agreed with the preliminary classifications for 87.1% (27/31) of the gene-disease pairs with published evidence ([Figure 5](#)). The four discrepancies between the expert and curator classifications were each different by only a single category (e.g., limited versus moderate). Of note, the original classifications for *HNRNPK* (MIM: 600712) and *SMARCA1* (MIM: 300012) were at the border between limited and moderate (6.5 points); in each case, the preliminary curators' lack of specific clinical expertise led to uncertainty regarding the scoring of evidence requiring such knowledge. Consulting with clinical experts in the disease resolved these issues, resulting in both genes being upgraded to moderate. In the case of *WRAP53* (MIM: 612661), the expert was aware of additional published experimental evidence that when included increased the classification from limited to moderate. Upon reviewing the curated evidence for *RAD51D* (MIM: 602954) and breast cancer (MIM: 614291), the domain expert upgraded the classification from disputed to limited (with the approval of the GCWG) due to the specificity of the experimental evidence and insufficient power of the current studies to rule out a role for *RAD51D* in breast cancer ([Figure 5](#)). Details and references for each curation are provided in supplemental figures ([Figures S2–S65](#)).

## Discussion

The evidence-based framework described here qualitatively defines clinical validity classifications for gene-dis-

ease associations in monogenic conditions and provides a systematic framework for evaluating key criteria required for these classifications. This method is intentionally flexible to accommodate curation of a wide spectrum of genes and conditions by curators with varying levels of expertise. The semiquantitative scoring system combined with the qualitative classification scheme guides curators through the preliminary decision-making process, while the expert-level review provides disease-specific experience to weigh in on the final classification.

This effort to create a generalized framework may result in some specific challenges due to the heterogeneity of genetic conditions, in both phenotype and prevalence. For example, conditions that span a large phenotypic spectrum may pose a challenge when defining what constitutes a condition and what is most relevant for curation purposes. In general, ClinGen encourages its expert curation groups to focus on disease associations that have been asserted in the literature or in other authoritative sources (e.g., OMIM, Orphanet Disease Ontology). Expert reviewers may find it useful in certain scenarios to curate both a syndromic disease association as well as an isolated/non-syndromic disease association limited to a particular sub-phenotype, for example, when a disease entity encompasses sub-phenotypes that are caused by different mutational mechanisms. This is a topic of continued discourse within the ClinGen working groups and will be incorporated into future manuscripts that will focus on the curation approach for individual ClinGen disease-focused expert groups.



### Clinical Validity Summary Matrix

| GENE/DISEASE PAIR:                  |                                                                                                |                                                                            |                                        |                                                              |
|-------------------------------------|------------------------------------------------------------------------------------------------|----------------------------------------------------------------------------|----------------------------------------|--------------------------------------------------------------|
| Assertion criteria                  | Genetic Evidence (0-12 points)                                                                 | Experimental Evidence (0-6 points)                                         | Total Points (0-18)                    | Replication Over Time (Y/N)                                  |
| Description                         | Case-level, family segregation, or case-control data that support the gene-disease association | Gene-level experimental evidence that support the gene-disease association | Sum of Genetic & Experimental Evidence | > 2 publications with convincing evidence over time (>3 yrs) |
| Assigned Points                     |                                                                                                |                                                                            |                                        |                                                              |
| CALCULATED CLASSIFICATION           |                                                                                                | LIMITED                                                                    | 1-6                                    |                                                              |
|                                     |                                                                                                | MODERATE                                                                   | 7-11                                   |                                                              |
|                                     |                                                                                                | STRONG                                                                     | 12-18                                  |                                                              |
|                                     |                                                                                                | DEFINITIVE                                                                 | 12-18 & Replicated Over Time           |                                                              |
| Valid contradictory evidence (Y/N)* | List references and describe evidence:                                                         |                                                                            |                                        |                                                              |
| CURATOR CLASSIFICATION              |                                                                                                |                                                                            |                                        |                                                              |
| FINAL CLASSIFICATION                |                                                                                                |                                                                            |                                        |                                                              |

**Figure 4. Final Summary Matrix Used to Provisionally Classify Gene-Disease Associations**

A summary matrix was designed to generate a “provisional” clinical validity assessment using a point system consistent with the qualitative descriptions of each classification. Genetic evidence: total number of points (not exceeding 12) obtained using the scoring metric in Figure 2. If no human variants associated with disease have been reported in the literature, then the default classification is “No Reported Evidence.” Experimental evidence: total number of points (not exceeding 6) derived from each of the experimental categories in Figure 3. Replication over time: yes, if more than 3 years has passed since the publication of the first paper reporting the gene-disease relationship AND more than two publications with human mutations exist. Contradictory evidence: no points are assigned to this category; instead, the curator should provide a summary of contradictory information. Scoring: the sum of the quantified evidence from each category can be used to determine a “provisional” classification using the scale at the bottom of the figure. If a curator does not agree with this classification, he/she may provide a different suggested classification along with appropriate justification.

Ultra-rare disorders may have a relatively small number of probands described in the medical literature, thus limiting their potential to achieve a high genetic evidence score within this matrix. This obstacle is mostly circumvented by allowing compelling pieces of genetic evidence to score the maximum number of points (for example, see *CD3E* [MIM: 186830] and severe combined immunodeficiency [MIM: 615615] in Figures S14 and S15). When substantial experimental evidence is also available, these conditions can attain a “Strong” or “Definitive” classification. On the opposite end of the spectrum are conditions that occur commonly in the general population, such as cancer, where the predominant etiology is multifactorial rather than monogenic. In the less common Mendelian cancer predisposition syndromes, incomplete penetrance is a typical feature that can lead to confounding factors in family genetic studies such as apparently non-penetrant family members who carry a disease-associated variant and phenocopies among family members without a disease-associated

variant. For such conditions, case-control data may provide more compelling evidence to support the gene-disease association (see Figures S36 and S37 for *PALB2* [MIM: 610355] and hereditary breast cancer [MIM: 114480] as an example).

One limitation of any such system is the challenge of balancing thorough literature curation and practical time commitment. This system can accommodate an exhaustive literature review, but in most cases will require curating only the amount of information sufficient to reach the maximum number of points in the matrix. In some scenarios this method may fail to include pertinent information, which could impact the classification (e.g., omission of contradictory evidence). Another potential limitation is the subjective nature of certain evidence types (e.g., experimental), which may lead to variability between different groups assessing evidence. However, due to the transparency of the evidence base, the incorporation of expert review, and the ability to reassess classifications over time, such drawbacks are likely to be self-limiting.

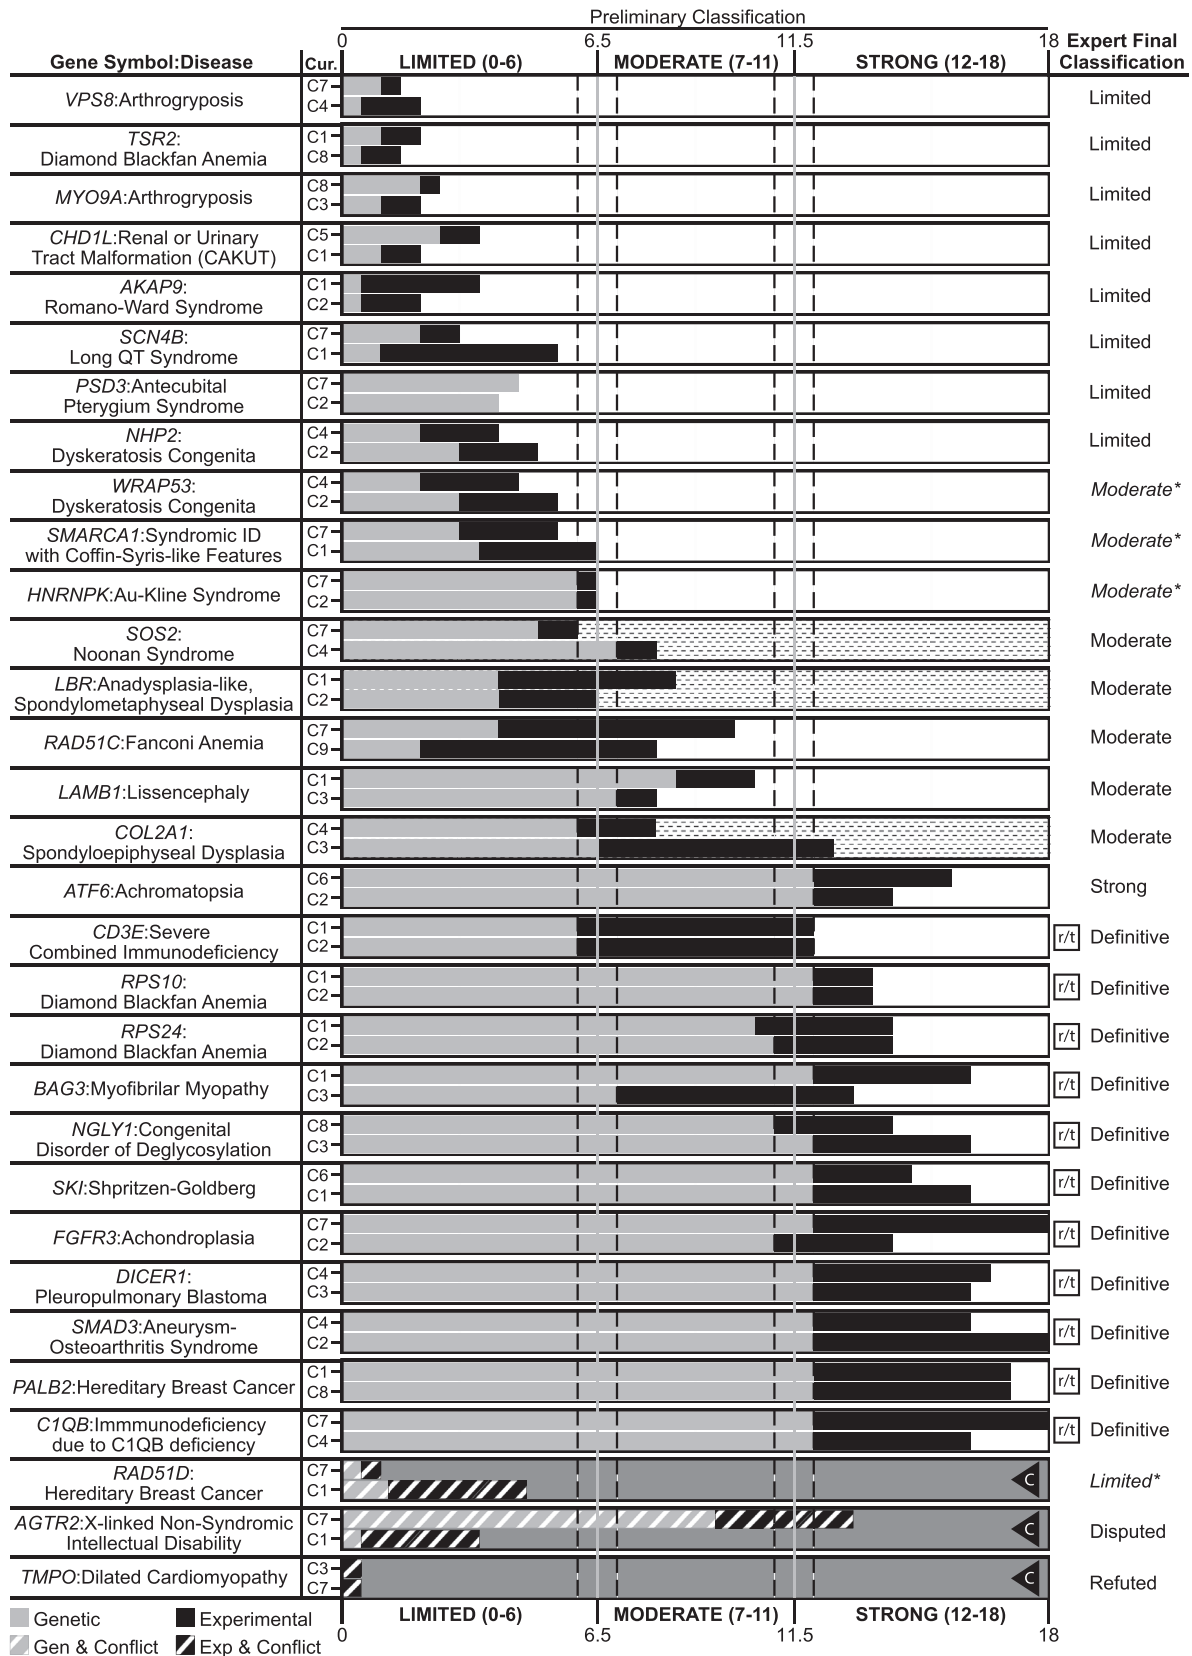

**Figure 5. Comparison of Provisional Clinical Validity Classifications and Associated Matrix Scores for Selected Gene-Disease Pairs Evaluated by Multiple Curators**

Of the 33 gene-disease pairs (y axis) curated to validate the clinical validity curation framework, 31 were classified using the summary matrix (two gene-disease pairs, *PMS2*:pancreatic cancer and *ARSD*:chondrodysplasia punctata, were classified as “No evidence reported”

(legend continued on next page)

ClinGen's ultimate goal is to enhance the incorporation of genomic information into clinical care, an important component of the Precision Medicine Initiative.<sup>12</sup> The implementation of this framework will be supported by an open-access ClinGen curation interface (under development) that will guide curators through the curation process and will serve as a platform for extension to the community. In essence, this framework aims to provide a systematic, transparent method to evaluate a gene-disease relationship in an efficient and consistent manner suitable for a diverse set of users. A detailed standard operating procedure for this framework is available on the ClinGen website. All curated evidence, including clinical validity assessments, will also be made readily accessible to clinical laboratories, clinicians, researchers, and the community via our website. Additionally, for community members that wish to contribute papers of interest and/or request curation of a gene-disease pair, a "reporter" form is available on the ClinGen website.

Carefully evaluated gene-disease clinical validity classifications, as provided by this framework, will be useful to clinical laboratories as they evaluate genes for inclusion on disease-targeted panels, or as they decide how to categorize, prioritize, and return results from exome/genome sequencing. Clinicians may choose to use these types of gene-disease classifications as they interpret laboratory results for the individuals they care for; for instance, they may choose not to adjust medical management based on variants in genes of limited clinical validity. Researchers could also utilize this framework to evaluate the clinical validity of their own newly discovered associations and identify promising target genes for future work in order to augment the currently available evidence and attain a "Strong" or "Definitive" classification. In addition, professional societies and regulatory bodies may utilize these clinical validity assessments when making recommendations or guidelines for clinical genetic testing. Ultimately, our systematic, evidence-based method for evaluating gene-disease associations will provide a strong foundation for genomic medicine.

### Supplemental Data

Supplemental Data include 65 figures and can be found with this article online at <http://dx.doi.org/10.1016/j.ajhg.2017.04.015>.

### Acknowledgments

This work was supported by grants U41 HG006834-01A1, U01 HG007437-01, and U01 HG007436-01 from the National Human

Genome Research Institute (NHGRI), the Eunice Kennedy Shriver National Institute of Child Health and Human Development (NICHD), and through contract HHSN261200800001E from the National Cancer Institute (NCI). ClinVar is supported by the Intramural Research Program of the NIH, National Library of Medicine. We would like to thank the following groups and individuals for contributing their disease expertise to review the examples included in this manuscript: Alan Beggs, Alison Bertuch, Rebecca H. Buckley, Eugene Chung, Bill Craigen, Jennifer M. Puck, Sharon A. Savage, Fergus J. Couch, the ClinGen Hereditary Breast and Ovarian Cancer gene curation working group, Birgit H. Funke and the ClinGen Cardiomyopathy gene curation working group, and the ClinGen RASopathy curation working group. Input on the framework was also provided by the ClinGen Hereditary Breast and Ovarian Cancer gene curation working group and Ray Hershberger, Mike Gollob, and the ClinGen Channelopathy gene curation working group. We would also like to thank Scott Goehringer for his invaluable help in preparing the curated examples for the ClinGen website and supplemental figures.

Received: February 22, 2017

Accepted: April 26, 2017

Published: May 25, 2017

### Web Resources

ClinGen, <https://www.clinicalgenome.org/>

ClinGen Gene Curation, <https://www.clinicalgenome.org/working-groups/gene-curation/>

ClinGen Gene Curation SOP, <https://www.clinicalgenome.org/working-groups/gene-curation/projects-initiatives/gene-disease-clinical-validity-sop/>

ClinGen Knowledge Base, [https://search.clinicalgenome.org/kb/agents/sign\\_up](https://search.clinicalgenome.org/kb/agents/sign_up)

OMIM, <http://www.omim.org/>

Orphanet, <http://www.orpha.net/consor/cgi-bin/index.php>

### References

1. Chong, J.X., Buckingham, K.J., Jhangiani, S.N., Boehm, C., Sobreira, N., Smith, J.D., Harrell, T.M., McMillin, M.J., Wiszniewski, W., Gambin, T., et al.; Centers for Mendelian Genomics (2015). The genetic basis of Mendelian phenotypes: discoveries, challenges, and opportunities. *Am. J. Hum. Genet.* 97, 199–215.
2. Haddow, J., and Palomacki, G. (2003). ACCE: a model process for evaluating data on emerging genetic tests. In *Human Genome Epidemiology: A Scientific Foundation for Using Genetic Information to Improve Health and Prevent Disease*, M. Khoury, J. Little, and W. Burke, eds. (Oxford University Press), pp. 217–233.

---

and are not shown). Genetic evidence (gray bars) and experimental evidence (black bars) were evaluated by two independent curators (C1-C9) to arrive at a provisional classification (x axis). Gene-disease relationships scoring between 12 and 18 points can be "Strong" or "Definitive," depending on whether the association has been replicated over time (indicated by the squared "r/t"), in which case the preliminary classification is "Definitive." Clinical validity classifications that were discordant between preliminary curators are represented with a dashed background. Gene-disease pairs in which conflicting evidence was reported are represented by diagonal lines through the evidence bars and a gray background. The letter "C" in a triangle indicates that the curators classified the gene-disease pair as "Conflicting Evidence Reported." Each gene-disease pair was ultimately evaluated by an expert in the field for a final classification (far right column). Final expert classifications that differed from the preliminary classification are indicated by italics and asterisks.

3. Wilfert, A.B., Chao, K.R., Kaushal, M., Jain, S., Zöllner, S., Adams, D.R., and Conrad, D.F. (2016). Genome-wide significance testing of variation from single case exomes. *Nat. Genet.* *48*, 1455–1461.
4. Eisenberger, T., Di Donato, N., Baig, S.M., Neuhaus, C., Beyer, A., Decker, E., Mürbe, D., Decker, C., Bergmann, C., and Bolz, H.J. (2014). Targeted and genomewide NGS data disqualify mutations in MYO1A, the “DFNA48 gene”, as a cause of deafness. *Hum. Mutat.* *35*, 565–570.
5. Rehm, H.L., Berg, J.S., Brooks, L.D., Bustamante, C.D., Evans, J.P., Landrum, M.J., Ledbetter, D.H., Maglott, D.R., Martin, C.L., Nussbaum, R.L., et al.; ClinGen (2015). ClinGen—the Clinical Genome Resource. *N. Engl. J. Med.* *372*, 2235–2242.
6. Lander, E., and Kruglyak, L. (1995). Genetic dissection of complex traits: guidelines for interpreting and reporting linkage results. *Nat. Genet.* *11*, 241–247.
7. Sham, P.C., and Purcell, S.M. (2014). Statistical power and significance testing in large-scale genetic studies. *Nat. Rev. Genet.* *15*, 335–346.
8. Lek, M., Karczewski, K.J., Minikel, E.V., Samocha, K.E., Banks, E., Fennell, T., O'Donnell-Luria, A.H., Ware, J.S., Hill, A.J., Cummings, B.B., et al.; Exome Aggregation Consortium (2016). Analysis of protein-coding genetic variation in 60,706 humans. *Nature* *536*, 285–291.
9. MacArthur, D.G., Manolio, T.A., Dimmock, D.P., Rehm, H.L., Shendure, J., Abecasis, G.R., Adams, D.R., Altman, R.B., Antonarakis, S.E., Ashley, E.A., et al. (2014). Guidelines for investigating causality of sequence variants in human disease. *Nature* *508*, 469–476.
10. Landrum, M.J., Lee, J.M., Riley, G.R., Jang, W., Rubinstein, W.S., Church, D.M., and Maglott, D.R. (2014). ClinVar: public archive of relationships among sequence variation and human phenotype. *Nucleic Acids Res.* *42*, D980–D985.
11. Fokkema, I.F., Taschner, P.E., Schaafsma, G.C., Celli, J., Laros, J.F., and den Dunnen, J.T. (2011). LOVD v.2.0: the next generation in gene variant databases. *Hum. Mutat.* *32*, 557–563.
12. Collins, F.S., and Varmus, H. (2015). A new initiative on precision medicine. *N. Engl. J. Med.* *372*, 793–795.

**The American Journal of Human Genetics, Volume 100**

## **Supplemental Data**

### **Evaluating the Clinical Validity of Gene-Disease**

#### **Associations: An Evidence-Based Framework**

#### **Developed by the Clinical Genome Resource**

**Natasha T. Strande, Erin Rooney Riggs, Adam H. Buchanan, Ozge Ceyhan-Birsoy, Marina DiStefano, Selina S. Dwight, Jenny Goldstein, Rajarshi Ghosh, Bryce A. Seifert, Tam P. Sneddon, Matt W. Wright, Laura V. Milko, J. Michael Cherry, Monica A. Giovanni, Michael F. Murray, Julianne M. O'Daniel, Erin M. Ramos, Avni B. Santani, Alan F. Scott, Sharon E. Plon, Heidi L. Rehm, Christa L. Martin, and Jonathan S. Berg**



**A. Dominant/X-linked**

$$Z = \log_{10} [1/(0.5)^n]$$

$n$  = dominant segregations

| $n$ | LOD | Points |
|-----|-----|--------|
| 15  | 4.5 | 6.5    |
| 14  | 4.2 | 6.0    |
| 13  | 3.9 | 5.5    |
| 12  | 3.6 | 5.5    |
| 11  | 3.3 | 5.0    |
| 10  | 3.0 | 5.0    |
| 9   | 2.7 | 4.5    |
| 8   | 2.4 | 4.0    |
| 7   | 2.1 | 4.0    |
| 6   | 1.8 | 3.5    |
| 5   | 1.5 | 3.0    |
| 4   | 1.2 | 1.5    |

**B. Recessive**

$$Z = \log_{10} \{1/[(0.25)^{x-1}(0.75)^y]\}$$

$x$  = affected individuals  
 $y$  = unaffected individuals

| $x/y$ | LOD  | Points |
|-------|------|--------|
| 7 / 4 | 4.11 | 6.0    |
| 7 / 1 | 3.73 | 5.5    |
| 6 / 1 | 3.14 | 5.0    |
| 5 / 1 | 2.53 | 4.5    |
| 4 / 3 | 2.18 | 4.0    |
| 4 / 1 | 1.90 | 3.5    |
| 3 / 3 | 1.50 | 3.0    |
| 3 / 2 | 1.45 | 2.5    |
| 3 / 1 | 1.30 | 2.5    |
| 2 / 3 | 1.00 | 1.5    |
| 2 / 2 | 0.85 | 1.0    |
| 2 / 1 | 0.72 | 1.0    |

**C. Proposed Matrix Scoring for LOD Ranges**

| LOD Range   | Points (Max = 7) |
|-------------|------------------|
| $\geq 5.00$ | 7.0              |
| 4.50 – 4.99 | 6.5              |
| 4.00 – 4.49 | 6.0              |
| 3.50 – 3.99 | 5.5              |
| 3.00 – 3.49 | 5.0 (1000:1)     |
| 2.50 – 2.99 | 4.5              |
| 2.00 – 2.49 | 4.0 (100:1)      |
| 1.75 – 1.99 | 3.5              |
| 1.50 – 1.74 | 3.0              |
| 1.25 – 1.49 | 2.5 (10:1)       |
| 1.00 – 1.24 | 1.5              |
| 0.72 – 0.99 | 1.0              |

**Figure S1: Guidelines for approximating LOD scores within the ClinGen clinical validity framework. (A, B)** LOD score ( $Z$ ) estimates are given for multiple segregation scenarios with a suggested number of points to be assigned in the genetic evidence category (Figure 3). **A.** LOD scores for disorders inherited in a dominant or X-linked manner should be calculated using the same equation, where  $n$  equals the number of dominant segregations. **B.** For autosomal recessive disorders, both unaffected carriers ( $y$ ) and affected genotype positive individuals ( $x$ ) should be included in the calculation of the LOD score. In general, the number of affected individuals ( $x$ ) - 1 is equal to the number of affected segregations and can be used interchangeably in this equation. **C.** A suggested number of points is provided for multiple ranges of LOD scores to facilitate consistent scoring in the summary matrix (Figure 4).

| AGTR2 and X-linked intellectual disability       |                                   |                                                     |                                                                                                                                                                                                            |                                                                                |        |        |       |                                                        |     |                                                     |
|--------------------------------------------------|-----------------------------------|-----------------------------------------------------|------------------------------------------------------------------------------------------------------------------------------------------------------------------------------------------------------------|--------------------------------------------------------------------------------|--------|--------|-------|--------------------------------------------------------|-----|-----------------------------------------------------|
|                                                  | Evidence Type                     | Case Information Type                               | Guidelines                                                                                                                                                                                                 |                                                                                |        | Scores |       | PMIDs/Notes                                            |     |                                                     |
|                                                  |                                   |                                                     | Default                                                                                                                                                                                                    | Range                                                                          | Max    | Points | Tally |                                                        |     |                                                     |
| Genetic Evidence                                 | Case-Level Data <sup>A</sup>      | Variant Evidence                                    | Autosomal Dominant or X-linked Disorder <sup>B</sup>                                                                                                                                                       | Variant is de novo <sup>C</sup>                                                | 2      | 0-3    | 12    |                                                        |     |                                                     |
|                                                  |                                   |                                                     |                                                                                                                                                                                                            | Proband with predicted or proven null variant <sup>D</sup>                     | 1.5    | 0-2    | 10    |                                                        |     |                                                     |
|                                                  |                                   |                                                     |                                                                                                                                                                                                            | Proband with other variant type with some evidence of gene impact <sup>E</sup> | 0.5    | 0-1.5  | 7     | 0.5                                                    | 0.5 | Takeshita E et al. 2012 Oct (22269148) <sup>1</sup> |
|                                                  |                                   | Autosomal Recessive Disease                         | Two variants in trans and at least one de novo <sup>C</sup> or a predicted/proven null variant <sup>D</sup>                                                                                                | 2                                                                              | 0-3    | 12     |       |                                                        |     |                                                     |
|                                                  |                                   |                                                     | Two variants (not predicted/proven null) with some evidence of gene impact <sup>E</sup> in trans                                                                                                           | 1                                                                              | 0-1.5  |        |       |                                                        |     |                                                     |
|                                                  | Segregation <sup>F</sup> Evidence | Evidence of segregation in one or more families     | LOD Score Examples                                                                                                                                                                                         | 3                                                                              | 5      | 0-7    | 7     |                                                        |     |                                                     |
|                                                  |                                   |                                                     |                                                                                                                                                                                                            | 2                                                                              | 4      |        |       |                                                        |     |                                                     |
|                                                  |                                   |                                                     |                                                                                                                                                                                                            | 1.5                                                                            | 3      |        |       |                                                        |     |                                                     |
|                                                  |                                   |                                                     |                                                                                                                                                                                                            | 1                                                                              | 1.5    |        |       |                                                        |     |                                                     |
|                                                  | Case-Control Data <sup>G</sup>    | Case-Control Study Type <sup>H</sup>                | Case-Control Quality Criteria <sup>I</sup>                                                                                                                                                                 | Guidelines                                                                     |        | Scores |       | PMIDs/Notes                                            |     |                                                     |
| Points/Study                                     |                                   |                                                     |                                                                                                                                                                                                            | Max                                                                            | Points | Tally  |       |                                                        |     |                                                     |
| Single Variant Analysis <sup>H<sub>a</sub></sup> |                                   | Aggregate Variant Analysis <sup>H<sub>b</sub></sup> | 1. Variant Detection Methodology <sup>H<sub>a</sub></sup><br>2. Power <sup>H<sub>b</sub></sup><br>3. Bias and confounding <sup>H<sub>c</sub></sup><br>4. Statistical Significance <sup>H<sub>d</sub></sup> | 0-6                                                                            | 12     |        |       |                                                        |     |                                                     |
|                                                  |                                   |                                                     |                                                                                                                                                                                                            | 0-6                                                                            | 12     |        |       |                                                        |     |                                                     |
| Total Genetic Evidence Points (Maximum 12)       |                                   |                                                     |                                                                                                                                                                                                            |                                                                                |        |        | 0.5   |                                                        |     |                                                     |
| Experimental Evidence                            | Evidence Category                 | Evidence Type                                       | Guidelines                                                                                                                                                                                                 |                                                                                |        | Scores |       | PMIDs/Notes                                            |     |                                                     |
|                                                  |                                   |                                                     | Default                                                                                                                                                                                                    | Range                                                                          | Max    | Points | Tally |                                                        |     |                                                     |
|                                                  | Function                          | Biochemical Function                                | 0.5                                                                                                                                                                                                        | 0 - 2                                                                          | 2      | 0.5    | 0.5   | Vervoort VS et al. 2002 Jun 28 (12089445) <sup>2</sup> |     |                                                     |
|                                                  |                                   | Protein Interaction                                 | 0.5                                                                                                                                                                                                        | 0 - 2                                                                          |        |        |       |                                                        |     |                                                     |
|                                                  |                                   | Expression                                          | 0.5                                                                                                                                                                                                        | 0 - 2                                                                          |        |        |       |                                                        |     |                                                     |
|                                                  | Functional Alteration             | Cells from affected individual                      | 1                                                                                                                                                                                                          | 0 - 2                                                                          | 2      | 0.5    | 0.5   | Pawlowski TL et al. 2009 Sep (19501643) <sup>3</sup>   |     |                                                     |
|                                                  |                                   | Engineered cells                                    | 0.5                                                                                                                                                                                                        | 0 - 1                                                                          |        |        |       |                                                        |     |                                                     |
|                                                  | Models & Rescue                   | Animal model                                        | 2                                                                                                                                                                                                          | 0 - 4                                                                          | 4      | 2.0    | 2     | Maul B et al. 2008 May (18335189) <sup>4</sup>         |     |                                                     |
|                                                  |                                   | Cell culture model system                           | 1                                                                                                                                                                                                          | 0 - 2                                                                          |        |        |       |                                                        |     |                                                     |
|                                                  |                                   | Rescue in animal model                              | 2                                                                                                                                                                                                          | 0 - 4                                                                          |        |        |       |                                                        |     |                                                     |
| Rescue in engineered equivalent                  |                                   | 1                                                   | 0 - 2                                                                                                                                                                                                      |                                                                                |        |        |       |                                                        |     |                                                     |
| Total Experimental Evidence Points (Maximum 6)   |                                   |                                                     |                                                                                                                                                                                                            |                                                                                |        |        | 3     |                                                        |     |                                                     |

**Figure S2: Summary of evidence for a relationship between AGTR2 and X-linked intellectual disability.** Evidence for the examples presented in Table 1 and Figure 5 is summarized in Figures S2-S65. The number of points awarded for each type of evidence and their corresponding references are provided. Footnotes A-I are the guidelines used to assess genetic evidence within this framework and apply to all of the examples presented in the following figures.

A. Each case may be given points for A) variant evidence (in the context of the appropriate mode of inheritance) and B) segregation evidence, if applicable (see footnote F and Figure S1 for more details on segregation evidence).

B. In X-linked disorders, affected probands will often be hemizygous males and/or heterozygous females. Recognizing that there can be rare cases of females affected by X-linked recessive disorders (due to chromosomal aneuploidy, skewed X inactivation, or homozygosity for a sequence variant) evaluators must interpret individual cases and X-linked pedigrees with caution.

C. Points should be adjusted depending on statistical expectation of *de novo* variation in the gene in question for variants.

- D. As described in the 2015 ACMG/AMP sequence variant interpretation guidelines<sup>5</sup>, null variants (typically nonsense, frameshift, canonical +/-1 or 2 splice sites, initiation codon, single or multi-exon deletions) are considered “very strong evidence for pathogenicity” in genes for which loss of function is a known disease mechanism. Disease mechanism can be assumed loss of function (LOF) if the gene is LOF constrained. LOF constraint scores must be interpreted in the context of the disease in question – genes associated with severe, pediatric-onset disorders are more likely to show constraint than adult-onset conditions where overall fitness is not impacted.
- E. For variants NOT considered to be “null” (typically missense), at least some impact to gene function must be demonstrated for the case to count. Impact based on predictions only would score less than the default 0.5 points and impact based on functional validation can score 0.5 or above (up to 1.5/case) depending on the validation quality and biological representativeness of the functional assay.
- F. LOD scores reported by the authors of a peer-reviewed journal article may be used to assign segregation points as outlined in the scoring matrix above. If a LOD score is not provided by the authors, one may be estimated for informative families with rare, highly penetrant disorders in which phenocopies are expected to be rare or absent. Below are guidelines for calculating estimated LOD scores in the appropriate scenarios are included in the standard operating procedure available online.
- G. Case-control studies should be independently assessed to evaluate the quality of the study design preferably in concert with an expert.
- H. Case-control studies are classified based on how variation in cases and controls is evaluated: single variant analysis or aggregate variant analysis. Studies presenting both types of analyses may be counted in either category at the discretion of the curator/expert, but the same variants should not be counted in both categories.
- a. *Single variant analysis* studies are those in which individual variants are evaluated for statistical enrichment in cases compared to controls. More than one variant may be analyzed, but the variants should be independently assessed with appropriate statistical correction for multiple testing.
- b. *Aggregate variant analysis* studies are those in which the statistical enrichment of two or more variants as an aggregate is assessed in cases compared to controls. This comparison could be accomplished by genotyping specific variants or by sequencing the entire gene.
- I. Points for case-control studies may be assigned at the discretion of expert opinion based on the overall quality of each study. The following should be considered when evaluating case-control study quality:
- a. *Variant Detection Methodology*: Cases and controls should ideally be analyzed using methods with equivalent analytical performance (e.g. equivalent genotype methods, sufficient and equivalent depth and quality of sequencing coverage, correction for batch effects).
- b. *Power*: The study should analyze a sufficient number of cases and controls given the prevalence of the disease, the allele frequency, and the expected effect size in question to provide appropriate statistical power to detect an association.
- c. *Bias and Confounding factors*: The manner in which cases and controls were selected for participation and the degree of case-control matching may impact the outcome of the study. The following are some factors that should be considered:
- i. Are there systematic differences between individuals selected for study and individuals not selected for study?
- ii. Are the cases and controls matched by demographic information (e.g., age, ethnicity, location of recruitment, etc.)?
- iii. Are the cases and controls matched for genetic ancestry, if not did investigators account for genetic ancestry in the analysis?
- iv. Have the cases and controls been equivalently evaluated for presence or absence of a phenotype, and/or family history of disease?
- d. *Statistical Significance* – The level of statistical significance should be weighed carefully. When an odds ratio is presented, its magnitude should be consistent with a monogenic disease etiology. When p-values or 95% confidence intervals (CI) are presented, the strength of the statistical association can be weighed in the final points assigned. Factors, such as multiple testing, that might impact that interpretation of uncorrected p-values and CIs should be considered when assigning points

| Assertion criteria                         | Genetic Evidence (0-12 points)                                                                                                                                                                                                 | Experimental Evidence (0-6 points)                                                                             | Total Points (0-18)                    | Replication Over Time (Y/N)                        |
|--------------------------------------------|--------------------------------------------------------------------------------------------------------------------------------------------------------------------------------------------------------------------------------|----------------------------------------------------------------------------------------------------------------|----------------------------------------|----------------------------------------------------|
| <b>Description</b>                         | Case-level, family segregation, or case-control data that support the gene-disease association                                                                                                                                 | Gene-level experimental evidence that support the gene-disease association                                     | Sum of Genetic & Experimental Evidence | > 2 pubs w/ convincing evidence over time (>3 yrs) |
| <b>Assigned Points</b>                     | <b>0.5</b>                                                                                                                                                                                                                     | <b>3</b>                                                                                                       | <b>3.5</b>                             | <b>NO</b>                                          |
| <b>CALCULATED CLASSIFICATION</b>           |                                                                                                                                                                                                                                | <b>LIMITED</b>                                                                                                 | <b>1-6</b>                             |                                                    |
|                                            |                                                                                                                                                                                                                                | <b>MODERATE</b>                                                                                                | <b>7-11</b>                            |                                                    |
|                                            |                                                                                                                                                                                                                                | <b>STRONG</b>                                                                                                  | <b>12-18</b>                           |                                                    |
|                                            |                                                                                                                                                                                                                                | <b>DEFINITIVE</b>                                                                                              | <b>12-18 AND replication over time</b> |                                                    |
| <b>Valid contradictory evidence (Y/N)*</b> | YES Piton A et al. 2013 Aug 8 (23871722) <sup>6</sup> ; (Piton et al. refutes the original gene-disease assertion and ExAC data demonstrates that almost all of the variants identified are common in the general population.) |                                                                                                                |                                        |                                                    |
| <b>CALCULATED CLASSIFICATION (DATE)</b>    |                                                                                                                                                                                                                                | <b>LIMITED</b>                                                                                                 |                                        |                                                    |
| <b>MODIFY CALCULATED CLASSIFICATION</b>    |                                                                                                                                                                                                                                | <b>YES</b>                                                                                                     |                                        |                                                    |
| <b>CURATOR CLASSIFICATION (DATE)</b>       |                                                                                                                                                                                                                                | <b>DISPUTED</b><br>10/10/2016                                                                                  |                                        |                                                    |
| <b>EXPERT CURATION (DATE)</b>              |                                                                                                                                                                                                                                | <b>DISPUTED</b><br>11/16/16<br>"Disputed" based on Pitton et al. 2013 <sup>6</sup> and ExAC <sup>7</sup> data. |                                        |                                                    |

**Figure S3: Summary matrix and classification for *AGTR2* and X-linked intellectual disability.**

| AKAP9 and autosomal dominant long QT syndrome |                                                |                                                 |                                                                                     |       |       |        |       |             |                                                    |
|-----------------------------------------------|------------------------------------------------|-------------------------------------------------|-------------------------------------------------------------------------------------|-------|-------|--------|-------|-------------|----------------------------------------------------|
|                                               | Evidence Type                                  | Case Information Type                           | Guidelines                                                                          |       |       | Scores |       | PMIDs/Notes |                                                    |
|                                               |                                                |                                                 | Default                                                                             | Range | Max   | Points | Tally |             |                                                    |
| Genetic Evidence                              | Variant Evidence                               | Autosomal Dominant or X-linked Disorder         | Variant is de novo                                                                  |       | 2     | 0-3    | 12    |             |                                                    |
|                                               |                                                |                                                 | Proband with predicted or proven null variant                                       |       | 1.5   | 0-2    | 10    |             |                                                    |
|                                               |                                                |                                                 | Proband with other variant type with some evidence of gene impact                   |       | 0.5   | 0-1.5  | 7     | 0.5         | 0.5                                                |
|                                               |                                                | Autosomal Recessive Disease                     | Two variants in trans and at least one de novo or a predicted/proven null variant   |       | 2     | 0-3    | 12    |             |                                                    |
|                                               |                                                |                                                 | Two variants (not predicted/proven null) with some evidence of gene impact in trans |       | 1     | 0-1.5  |       |             |                                                    |
|                                               | Segregation Evidence                           | Evidence of segregation in one or more families | LOD Score Examples                                                                  | 3     | 5     | 0-7    | 7     |             |                                                    |
|                                               |                                                |                                                 |                                                                                     | 2     | 4     |        |       |             |                                                    |
|                                               |                                                |                                                 |                                                                                     | 1.5   | 3     |        |       |             |                                                    |
|                                               |                                                |                                                 |                                                                                     | 1     | 1.5   |        |       |             |                                                    |
|                                               |                                                |                                                 |                                                                                     |       |       |        |       |             |                                                    |
| Case-Level Data                               | Case-Control Study Type                        | Case-Control Quality Criteria                   | Guidelines                                                                          |       |       | Scores |       | PMIDs/Notes |                                                    |
|                                               |                                                |                                                 | Points/Study                                                                        |       | Max   | Points | Tally |             |                                                    |
|                                               |                                                |                                                 | 1. Variant Detection Methodology                                                    |       | 0-6   | 12     |       |             |                                                    |
|                                               |                                                |                                                 | 2. Power                                                                            |       | 0-6   | 12     |       |             |                                                    |
|                                               |                                                |                                                 | 3. Bias and confounding                                                             |       |       |        |       |             |                                                    |
| 4. Statistical Significance                   |                                                |                                                 |                                                                                     |       |       |        |       |             |                                                    |
| Total Genetic Evidence Points (Maximum 12)    |                                                |                                                 |                                                                                     |       |       |        | 0.5   |             |                                                    |
| Experimental Evidence                         | Function                                       | Biochemical Function                            |                                                                                     | 0.5   | 0 - 2 | 2      | 0.5   | 0.5         | Marx SO et al. 2002 Jan 18 (11799244) <sup>9</sup> |
|                                               |                                                | Protein Interaction                             |                                                                                     | 0.5   | 0 - 2 |        |       |             |                                                    |
|                                               |                                                | Expression                                      |                                                                                     | 0.5   | 0 - 2 |        |       |             |                                                    |
|                                               | Functional Alteration                          | Cells from affected individual                  |                                                                                     | 1     | 0 - 2 | 2      | 1.0   | 1           | Chen L et al. 2007 Dec 26 (18093912) <sup>8</sup>  |
|                                               |                                                | Engineered cells                                |                                                                                     | 0.5   | 0 - 1 |        |       |             |                                                    |
|                                               | Models & Rescue                                | Animal model                                    |                                                                                     | 2     | 0 - 4 | 4      |       |             |                                                    |
|                                               |                                                | Cell culture model system                       |                                                                                     | 1     | 0 - 2 |        |       |             |                                                    |
|                                               |                                                | Rescue in animal model                          |                                                                                     | 2     | 0 - 4 |        |       |             |                                                    |
|                                               |                                                | Rescue in engineered equivalent                 |                                                                                     | 1     | 0 - 2 |        |       |             |                                                    |
|                                               | Total Experimental Evidence Points (Maximum 6) |                                                 |                                                                                     |       |       |        |       | 1.5         |                                                    |

Figure S4: Summary of evidence supporting a relationship between *AKAP9* and autosomal dominant long QT syndrome.



| Assertion criteria                      | Genetic Evidence (0-12 points)                                                                 | Experimental Evidence (0-6 points)                                         | Total Points (0-18)                    | Replication Over Time (Y/N)                        |
|-----------------------------------------|------------------------------------------------------------------------------------------------|----------------------------------------------------------------------------|----------------------------------------|----------------------------------------------------|
| <b>Description</b>                      | Case-level, family segregation, or case-control data that support the gene-disease association | Gene-level experimental evidence that support the gene-disease association | Sum of Genetic & Experimental Evidence | > 2 pubs w/ convincing evidence over time (>3 yrs) |
| <b>Assigned Points</b>                  | <b>0.5</b>                                                                                     | <b>1.5</b>                                                                 | <b>2</b>                               | <b>NO</b>                                          |
| <b>CALCULATED CLASSIFICATION</b>        |                                                                                                | <b>LIMITED</b>                                                             | <b>1-6</b>                             |                                                    |
|                                         |                                                                                                | <b>MODERATE</b>                                                            | <b>7-11</b>                            |                                                    |
|                                         |                                                                                                | <b>STRONG</b>                                                              | <b>12-18</b>                           |                                                    |
|                                         |                                                                                                | <b>DEFINITIVE</b>                                                          | <b>12-18 AND replication over time</b> |                                                    |
| Valid contradictory evidence (Y/N)*     | NO                                                                                             |                                                                            |                                        |                                                    |
| <b>CALCULATED CLASSIFICATION (DATE)</b> |                                                                                                | <b>LIMITED</b><br>04/05/16                                                 |                                        |                                                    |
| <b>EXPERT CURATION (DATE)</b>           |                                                                                                | <b>LIMITED</b><br>12/15/16                                                 |                                        |                                                    |

**Figure S5: Summary matrix and classification for *AKAP9* and autosomal dominant long QT syndrome.**

**ARSD and chondrodysplasia punctata**

| Evidence Type                              |                                                 | Case Information Type          |                                                                                                        | Guidelines                                                        |       |        | Scores |                                                                     | PMIDs/Notes |
|--------------------------------------------|-------------------------------------------------|--------------------------------|--------------------------------------------------------------------------------------------------------|-------------------------------------------------------------------|-------|--------|--------|---------------------------------------------------------------------|-------------|
|                                            |                                                 |                                |                                                                                                        | Default                                                           | Range | Max    | Points | Tally                                                               |             |
| Genetic Evidence                           | Case-Level Data                                 | Variant Evidence               | Autosomal Dominant or X-linked Disorder                                                                | Variant is de novo                                                | 2     | 0-3    | 12     | 0.0                                                                 |             |
|                                            |                                                 |                                |                                                                                                        | Proband with predicted or proven null variant                     | 1.5   | 0-2    | 10     | 0.0                                                                 |             |
|                                            |                                                 |                                |                                                                                                        | Proband with other variant type with some evidence of gene impact | 0.5   | 0-1.5  | 7      | 0.0                                                                 | 0           |
|                                            |                                                 | Autosomal Recessive Disease    | Two variants in trans and at least one de novo or a predicted/proven null variant                      | 2                                                                 | 0-3   | 12     | 0.0    | 0                                                                   |             |
|                                            |                                                 |                                | Two variants (not predicted/proven null) with some evidence of gene impact in trans                    | 1                                                                 | 0-1.5 |        |        |                                                                     |             |
| Segregation Evidence                       | Evidence of segregation in one or more families | LOD Score Examples             | 3                                                                                                      | 5                                                                 | 0-7   | 7      | 0.0    |                                                                     |             |
|                                            |                                                 |                                | 2                                                                                                      | 4                                                                 |       |        |        |                                                                     |             |
|                                            |                                                 |                                | 1.5                                                                                                    | 3                                                                 |       |        |        |                                                                     |             |
|                                            |                                                 |                                | 1                                                                                                      | 1.5                                                               |       |        |        |                                                                     |             |
|                                            |                                                 |                                |                                                                                                        |                                                                   |       |        |        |                                                                     |             |
| Genetic Evidence                           | Case-Control Data                               | Case-Control Study Type        | Case-Control Quality Criteria                                                                          | Guidelines                                                        |       |        | Scores |                                                                     | PMIDs/Notes |
|                                            |                                                 |                                |                                                                                                        | Points/Study                                                      | Max   | Points | Tally  |                                                                     |             |
|                                            |                                                 | Single Variant Analysis        | 1. Variant Detection Methodology<br>2. Power<br>3. Bias and confounding<br>4. Statistical Significance | 0-6                                                               | 12    | 0.0    |        |                                                                     |             |
|                                            |                                                 | Aggregate Variant Analysis     |                                                                                                        | 0-6                                                               | 12    | 0.0    |        |                                                                     |             |
| Total Genetic Evidence Points (Maximum 12) |                                                 |                                |                                                                                                        |                                                                   |       |        | 0      | No reports of variants in this gene associated with this condition. |             |
| Experimental Evidence                      | Function                                        | Biochemical Function           | 0.5                                                                                                    | 0 - 2                                                             | 2     |        |        |                                                                     |             |
|                                            |                                                 |                                | Protein Interaction                                                                                    | 0.5                                                               |       |        |        |                                                                     | 0 - 2       |
|                                            | Expression                                      |                                | 0.5                                                                                                    | 0 - 2                                                             |       |        |        |                                                                     |             |
|                                            | Functional Alteration                           | Cells from affected individual | 1                                                                                                      | 0 - 2                                                             | 2     |        |        |                                                                     |             |
|                                            |                                                 |                                | Engineered cells                                                                                       | 0.5                                                               |       |        |        |                                                                     | 0 - 1       |
|                                            | Models & Rescue                                 | Animal model                   | 2                                                                                                      | 0 - 4                                                             | 4     |        |        |                                                                     |             |
|                                            |                                                 |                                | Cell culture model system                                                                              | 1                                                                 |       |        |        |                                                                     | 0 - 2       |
|                                            |                                                 |                                | Rescue in animal model                                                                                 | 2                                                                 |       |        |        |                                                                     | 0 - 4       |
|                                            |                                                 |                                | Rescue in engineered equivalent                                                                        | 1                                                                 |       |        |        |                                                                     | 0 - 2       |
|                                            | Total Experimental Evidence Points (Maximum 6)  |                                |                                                                                                        |                                                                   |       |        |        | 0                                                                   |             |

**Figure S6: Summary of evidence supporting a relationship between ARSD and chondrodysplasia punctata.**

| Assertion criteria                      | Genetic Evidence (0-12 points)                                                                 | Experimental Evidence (0-6 points)                                         | Total Points (0-18)                    | Replication Over Time (Y/N)                        |
|-----------------------------------------|------------------------------------------------------------------------------------------------|----------------------------------------------------------------------------|----------------------------------------|----------------------------------------------------|
| <b>Description</b>                      | Case-level, family segregation, or case-control data that support the gene-disease association | Gene-level experimental evidence that support the gene-disease association | Sum of Genetic & Experimental Evidence | > 2 pubs w/ convincing evidence over time (>3 yrs) |
| <b>Assigned Points</b>                  |                                                                                                | <b>0</b>                                                                   | <b>0</b>                               | <b>NO</b>                                          |
| <b>CALCULATED CLASSIFICATION</b>        |                                                                                                | <b>LIMITED</b>                                                             | <b>1-6</b>                             |                                                    |
|                                         |                                                                                                | <b>MODERATE</b>                                                            | <b>7-11</b>                            |                                                    |
|                                         |                                                                                                | <b>STRONG</b>                                                              | <b>12-18</b>                           |                                                    |
|                                         |                                                                                                | <b>DEFINITIVE</b>                                                          | <b>12-18 AND replication over time</b> |                                                    |
| Valid contradictory evidence (Y/N)*     | NO                                                                                             |                                                                            |                                        |                                                    |
| <b>CALCULATED CLASSIFICATION (DATE)</b> |                                                                                                | <b>NO REPORTED EVIDENCE</b><br>07/14/2016                                  |                                        |                                                    |
| <b>EXPERT CURATION (DATE)</b>           |                                                                                                | <b>NO REPORTED EVIDENCE</b><br>11/15/16                                    |                                        |                                                    |

**Figure S7: Summary matrix and classification for *ARSD* and chondrodysplasia punctata.**

## ATF6 and autosomal recessive achromatopsia

| Evidence Type                                         |                                                 | Case Information Type          |                                                                                                        | Guidelines                                                        |       |        | Scores                                           |                                                  | PMIDs/Notes                                                                              |
|-------------------------------------------------------|-------------------------------------------------|--------------------------------|--------------------------------------------------------------------------------------------------------|-------------------------------------------------------------------|-------|--------|--------------------------------------------------|--------------------------------------------------|------------------------------------------------------------------------------------------|
|                                                       |                                                 |                                |                                                                                                        | Default                                                           | Range | Max    | Points                                           | Tally                                            |                                                                                          |
| Genetic Evidence                                      | Case-Level Data                                 | Variant Evidence               | Autosomal Dominant or X-linked Disorder                                                                | Variant is de novo                                                | 2     | 0-3    | 12                                               |                                                  |                                                                                          |
|                                                       |                                                 |                                |                                                                                                        | Proband with predicted or proven null variant                     | 1.5   | 0-2    | 10                                               |                                                  |                                                                                          |
|                                                       |                                                 |                                |                                                                                                        | Proband with other variant type with some evidence of gene impact | 0.5   | 0-1.5  | 7                                                |                                                  |                                                                                          |
|                                                       |                                                 | Autosomal Recessive Disease    | Two variants in trans and at least one de novo or a predicted/proven null variant                      | 2                                                                 | 0-3   | 12     | 9.0                                              | 12                                               | Ansar M et al. 2015 Sep (26063662); Kohli S et al. 2015 Jul (26029869) <sup>10; 11</sup> |
|                                                       |                                                 |                                | Two variants (not predicted/proven null) with some evidence of gene impact in trans                    | 1                                                                 | 0-1.5 |        |                                                  |                                                  |                                                                                          |
| Segregation Evidence                                  | Evidence of segregation in one or more families | LOD Score Examples             | 3                                                                                                      | 5                                                                 | 0-7   | 7      | 7.0                                              | 7                                                | Ansar M et al. 2015 Sep (26063662); Kohli S et al. 2015 Jul (26029869) <sup>10; 11</sup> |
|                                                       |                                                 |                                | 2                                                                                                      | 4                                                                 |       |        |                                                  |                                                  |                                                                                          |
|                                                       |                                                 |                                | 1.5                                                                                                    | 3                                                                 |       |        |                                                  |                                                  |                                                                                          |
|                                                       |                                                 |                                | 1                                                                                                      | 1.5                                                               |       |        |                                                  |                                                  |                                                                                          |
|                                                       |                                                 |                                |                                                                                                        |                                                                   |       |        |                                                  |                                                  |                                                                                          |
| Case-Control Data                                     | Case-Control Study Type                         | Case-Control Quality Criteria  |                                                                                                        | Guidelines                                                        |       | Scores |                                                  | PMIDs/Notes                                      |                                                                                          |
|                                                       |                                                 |                                |                                                                                                        | Points/Study                                                      | Max   | Points | Tally                                            |                                                  |                                                                                          |
|                                                       |                                                 | Single Variant Analysis        | 1. Variant Detection Methodology<br>2. Power<br>3. Bias and confounding<br>4. Statistical Significance |                                                                   | 0-6   | 12     |                                                  |                                                  |                                                                                          |
|                                                       |                                                 |                                |                                                                                                        |                                                                   | 0-6   | 12     |                                                  |                                                  |                                                                                          |
| <b>Total Genetic Evidence Points (Maximum 12)</b>     |                                                 |                                |                                                                                                        |                                                                   |       |        |                                                  | <b>14</b>                                        |                                                                                          |
| Experimental Evidence                                 | Function                                        | Biochemical Function           | 0.5                                                                                                    | 0 - 2                                                             | 2     | 0.5    | 0.5                                              | Ansar M et al. 2015 Sep (26063662) <sup>11</sup> |                                                                                          |
|                                                       |                                                 |                                | 0.5                                                                                                    | 0 - 2                                                             |       |        |                                                  |                                                  |                                                                                          |
|                                                       |                                                 |                                | 0.5                                                                                                    | 0 - 2                                                             |       |        |                                                  |                                                  |                                                                                          |
|                                                       | Functional Alteration                           | Cells from affected individual | 1                                                                                                      | 0 - 2                                                             | 2     | 0.5    | 0.5                                              | Ansar M et al. 2015 Sep (26063662) <sup>11</sup> |                                                                                          |
|                                                       |                                                 |                                | 0.5                                                                                                    | 0 - 1                                                             |       |        |                                                  |                                                  |                                                                                          |
| Models & Rescue                                       | Animal model                                    | 2                              | 0 - 4                                                                                                  | 4                                                                 | 1.0   | 1      | Kohli S et al. 2015 Jul (26029869) <sup>10</sup> |                                                  |                                                                                          |
|                                                       |                                                 | 1                              | 0 - 2                                                                                                  |                                                                   |       |        |                                                  |                                                  |                                                                                          |
|                                                       |                                                 | 2                              | 0 - 4                                                                                                  |                                                                   |       |        |                                                  |                                                  |                                                                                          |
|                                                       |                                                 | 1                              | 0 - 2                                                                                                  |                                                                   |       |        |                                                  |                                                  |                                                                                          |
| <b>Total Experimental Evidence Points (Maximum 6)</b> |                                                 |                                |                                                                                                        |                                                                   |       |        |                                                  | <b>2</b>                                         |                                                                                          |

**Figure S8: Summary of evidence supporting a relationship between ATF6 and autosomal recessive achromatopsia.**

| Assertion criteria                      | Genetic Evidence (0-12 points)                                                                 | Experimental Evidence (0-6 points)                                         | Total Points (0-18)                    | Replication Over Time (Y/N)                        |
|-----------------------------------------|------------------------------------------------------------------------------------------------|----------------------------------------------------------------------------|----------------------------------------|----------------------------------------------------|
| <b>Description</b>                      | Case-level, family segregation, or case-control data that support the gene-disease association | Gene-level experimental evidence that support the gene-disease association | Sum of Genetic & Experimental Evidence | > 2 pubs w/ convincing evidence over time (>3 yrs) |
| <b>Assigned Points</b>                  | <b>12</b>                                                                                      | <b>2</b>                                                                   | <b>14</b>                              | <b>NO</b>                                          |
| <b>CALCULATED CLASSIFICATION</b>        |                                                                                                | <b>LIMITED</b>                                                             | <b>1-6</b>                             |                                                    |
|                                         |                                                                                                | <b>MODERATE</b>                                                            | <b>7-11</b>                            |                                                    |
|                                         |                                                                                                | <b>STRONG</b>                                                              | <b>12-18</b>                           |                                                    |
|                                         |                                                                                                | <b>DEFINITIVE</b>                                                          | <b>12-18 AND replication over time</b> |                                                    |
| Valid contradictory evidence (Y/N)*     | NO                                                                                             |                                                                            |                                        |                                                    |
| <b>CALCULATED CLASSIFICATION (DATE)</b> |                                                                                                | <b>STRONG</b><br>06/01/2016                                                |                                        |                                                    |
| <b>EXPERT CURATION (DATE)</b>           |                                                                                                | <b>STRONG</b><br>11/16/2016                                                |                                        |                                                    |

**Figure S9: Summary matrix and classification for *ATF6* and autosomal recessive achromatopsia.**



| <b>BAG3 and autosomal dominant myofibrillar myopathy</b> |                                 |                                                        |                                                                                     |                                                                   |        |        |                                                                                               |                                                                                           |     |
|----------------------------------------------------------|---------------------------------|--------------------------------------------------------|-------------------------------------------------------------------------------------|-------------------------------------------------------------------|--------|--------|-----------------------------------------------------------------------------------------------|-------------------------------------------------------------------------------------------|-----|
|                                                          | Evidence Type                   | Case Information Type                                  | Guidelines                                                                          |                                                                   |        | Scores |                                                                                               | PMIDs/Notes                                                                               |     |
|                                                          |                                 |                                                        | Default                                                                             | Range                                                             | Max    | Points | Tally                                                                                         |                                                                                           |     |
| Genetic Evidence                                         | Case-Level Data                 | Variant Evidence                                       | Autosomal Dominant or X-linked Disorder                                             | Variant is de novo                                                |        | 2      | 0-3                                                                                           | 12                                                                                        |     |
|                                                          |                                 |                                                        |                                                                                     | Proband with predicted or proven null variant                     |        | 1.5    | 0-2                                                                                           | 10                                                                                        |     |
|                                                          |                                 |                                                        |                                                                                     | Proband with other variant type with some evidence of gene impact |        | 0.5    | 0-1.5                                                                                         | 7                                                                                         | 7.0 |
|                                                          |                                 | Autosomal Recessive Disease                            | Two variants in trans and at least one de novo or a predicted/proven null variant   |                                                                   | 2      | 0-3    | 12                                                                                            |                                                                                           |     |
|                                                          |                                 |                                                        | Two variants (not predicted/proven null) with some evidence of gene impact in trans |                                                                   | 1      | 0-1.5  |                                                                                               |                                                                                           |     |
|                                                          | Segregation Evidence            | Evidence of segregation in one or more families        | LOD Score Examples                                                                  | 3                                                                 | 5      | 0-7    | 7                                                                                             |                                                                                           |     |
|                                                          |                                 |                                                        |                                                                                     | 2                                                                 | 4      |        |                                                                                               |                                                                                           |     |
|                                                          |                                 |                                                        |                                                                                     | 1.5                                                               | 3      |        |                                                                                               |                                                                                           |     |
|                                                          |                                 |                                                        |                                                                                     | 1                                                                 | 1.5    |        |                                                                                               |                                                                                           |     |
|                                                          |                                 |                                                        |                                                                                     |                                                                   |        |        |                                                                                               |                                                                                           |     |
| Case-Control Data                                        | Case-Control Study Type         | Case-Control Quality Criteria                          | Guidelines                                                                          |                                                                   |        | Scores |                                                                                               | PMIDs/Notes                                                                               |     |
|                                                          |                                 |                                                        | Points/Study                                                                        | Max                                                               | Points | Tally  |                                                                                               |                                                                                           |     |
|                                                          | Single Variant Analysis         | 1. Variant Detection Methodology<br>2. Power           | 0-6                                                                                 | 12                                                                |        |        |                                                                                               |                                                                                           |     |
|                                                          | Aggregate Variant Analysis      | 3. Bias and confounding<br>4. Statistical Significance | 0-6                                                                                 | 12                                                                |        |        |                                                                                               |                                                                                           |     |
| Total Genetic Evidence Points (Maximum 12)               |                                 |                                                        |                                                                                     |                                                                   |        |        | 7                                                                                             |                                                                                           |     |
| Experimental Evidence                                    | Evidence Category               | Evidence Type                                          | Guidelines                                                                          |                                                                   |        | Scores |                                                                                               | PMIDs/Notes                                                                               |     |
|                                                          |                                 |                                                        | Default                                                                             | Range                                                             | Max    | Points | Tally                                                                                         |                                                                                           |     |
|                                                          | Function                        | Biochemical Function                                   | 0.5                                                                                 | 0 - 2                                                             | 2      | 1.0    | 1                                                                                             | Homma S et al. 2006 Sep (16936253); Seicen D et al. 2009 Jan (19085932) <sup>12; 19</sup> |     |
|                                                          |                                 | Protein Interaction                                    | 0.5                                                                                 | 0 - 2                                                             |        |        |                                                                                               |                                                                                           |     |
|                                                          |                                 | Expression                                             | 0.5                                                                                 | 0 - 2                                                             |        |        |                                                                                               |                                                                                           |     |
|                                                          | Functional Alteration           | Cells from affected individual                         | 1                                                                                   | 0 - 2                                                             | 2      |        |                                                                                               |                                                                                           |     |
|                                                          |                                 | Engineered cells                                       | 0.5                                                                                 | 0 - 1                                                             |        |        |                                                                                               |                                                                                           |     |
| Models & Rescue                                          | Animal model                    | 2                                                      | 0 - 4                                                                               | 4                                                                 | 6.0    | 4      | Homma S et al. 2006 Sep (16936253); Hishiya A et al. 2010 Nov 12 (20884878) <sup>19; 20</sup> |                                                                                           |     |
|                                                          | Cell culture model system       | 1                                                      | 0 - 2                                                                               |                                                                   |        |        |                                                                                               |                                                                                           |     |
|                                                          | Rescue in animal model          | 2                                                      | 0 - 4                                                                               |                                                                   |        |        |                                                                                               |                                                                                           |     |
|                                                          | Rescue in engineered equivalent | 1                                                      | 0 - 2                                                                               |                                                                   |        |        |                                                                                               |                                                                                           |     |
| Total Experimental Evidence Points (Maximum 6)           |                                 |                                                        |                                                                                     |                                                                   |        |        | 5                                                                                             |                                                                                           |     |

**Figure S10: Summary of evidence supporting a relationship between BAG3 and autosomal dominant myofibrillar myopathy.**

| Assertion criteria                      | Genetic Evidence (0-12 points)                                                                 | Experimental Evidence (0-6 points)                                         | Total Points (0-18)                    | Replication Over Time (Y/N)                        |
|-----------------------------------------|------------------------------------------------------------------------------------------------|----------------------------------------------------------------------------|----------------------------------------|----------------------------------------------------|
| <b>Description</b>                      | Case-level, family segregation, or case-control data that support the gene-disease association | Gene-level experimental evidence that support the gene-disease association | Sum of Genetic & Experimental Evidence | > 2 pubs w/ convincing evidence over time (>3 yrs) |
| <b>Assigned Points</b>                  | <b>7</b>                                                                                       | <b>5</b>                                                                   | <b>12</b>                              | <b>YES</b>                                         |
| <b>CALCULATED CLASSIFICATION</b>        |                                                                                                | <b>LIMITED</b>                                                             | <b>1-6</b>                             |                                                    |
|                                         |                                                                                                | <b>MODERATE</b>                                                            | <b>7-11</b>                            |                                                    |
|                                         |                                                                                                | <b>STRONG</b>                                                              | <b>12-18</b>                           |                                                    |
|                                         |                                                                                                | <b>DEFINITIVE</b>                                                          | <b>12-18 AND replication over time</b> |                                                    |
| Valid contradictory evidence (Y/N)*     | NO                                                                                             |                                                                            |                                        |                                                    |
| <b>CALCULATED CLASSIFICATION (DATE)</b> |                                                                                                | <b>DEFINITIVE</b>                                                          |                                        |                                                    |
| <b>EXPERT CURATION (DATE)</b>           |                                                                                                | <b>DEFINITIVE</b><br>12/18/2016                                            |                                        |                                                    |

**Figure S11: Summary matrix and classification for *BAG3* and autosomal dominant myofibrillar myopathy.**

**C1QB and autosomal recessive immunodeficiency due to an early component of complement deficiency**

| Genetic Evidence                               | Evidence Type                                          | Case Information Type                                                               | Guidelines                                                        |       |        | Scores |                                                            | PMIDs/Notes                                                                                                                                                                                                                                                              |                                                                                                                                                                                                                                                             |
|------------------------------------------------|--------------------------------------------------------|-------------------------------------------------------------------------------------|-------------------------------------------------------------------|-------|--------|--------|------------------------------------------------------------|--------------------------------------------------------------------------------------------------------------------------------------------------------------------------------------------------------------------------------------------------------------------------|-------------------------------------------------------------------------------------------------------------------------------------------------------------------------------------------------------------------------------------------------------------|
|                                                |                                                        |                                                                                     | Default                                                           | Range | Max    | Points | Tally                                                      |                                                                                                                                                                                                                                                                          |                                                                                                                                                                                                                                                             |
|                                                |                                                        |                                                                                     |                                                                   |       |        |        |                                                            |                                                                                                                                                                                                                                                                          |                                                                                                                                                                                                                                                             |
| Case-Level Data                                | Variant Evidence                                       | Autosomal Dominant or X-linked Disorder                                             | Variant is de novo                                                |       | 2      | 0-3    | 12                                                         |                                                                                                                                                                                                                                                                          |                                                                                                                                                                                                                                                             |
|                                                |                                                        |                                                                                     | Proband with predicted or proven null variant                     |       | 1.5    | 0-2    | 10                                                         |                                                                                                                                                                                                                                                                          |                                                                                                                                                                                                                                                             |
|                                                |                                                        |                                                                                     | Proband with other variant type with some evidence of gene impact |       | 0.5    | 0-1.5  | 7                                                          |                                                                                                                                                                                                                                                                          |                                                                                                                                                                                                                                                             |
|                                                | Autosomal Recessive Disease                            | Two variants in trans and at least one de novo or a predicted/proven null variant   |                                                                   | 2     | 0-3    | 12     | 8.0                                                        | 10                                                                                                                                                                                                                                                                       | Petry F et al. 1997 Dec (9476130); Marquart HV et al. 2007 Jul (17513176); McAdam RA et al. 1988 (2894352); Troedson C et al. 2013 May (23651859); Higuchi Y et al. 2013 Oct 28 (24160257); van Schaarenburg RA et al. 2015 Mar (25454803) <sup>21-26</sup> |
|                                                |                                                        | Two variants (not predicted/proven null) with some evidence of gene impact in trans |                                                                   | 1     | 0-1.5  |        |                                                            |                                                                                                                                                                                                                                                                          |                                                                                                                                                                                                                                                             |
| Segregation Evidence                           | Evidence of segregation in one or more families        | LOD Score Examples                                                                  | 3                                                                 | 5     | 0-7    | 7      | 3.5                                                        | 3.5                                                                                                                                                                                                                                                                      | Marquart HV et al. 2007 Jul (17513176); Higuchi Y et al. 2013 Oct 28 (24160257) <sup>23, 25</sup>                                                                                                                                                           |
|                                                |                                                        |                                                                                     | 2                                                                 | 4     |        |        |                                                            |                                                                                                                                                                                                                                                                          |                                                                                                                                                                                                                                                             |
|                                                |                                                        |                                                                                     | 1.5                                                               | 3     |        |        |                                                            |                                                                                                                                                                                                                                                                          |                                                                                                                                                                                                                                                             |
|                                                |                                                        |                                                                                     | 1                                                                 | 1.5   |        |        |                                                            |                                                                                                                                                                                                                                                                          |                                                                                                                                                                                                                                                             |
|                                                |                                                        |                                                                                     |                                                                   |       |        |        |                                                            |                                                                                                                                                                                                                                                                          |                                                                                                                                                                                                                                                             |
| Case-Control Data                              | Case-Control Study Type                                | Case-Control Quality Criteria                                                       | Guidelines                                                        |       |        | Scores |                                                            | PMIDs/Notes                                                                                                                                                                                                                                                              |                                                                                                                                                                                                                                                             |
|                                                |                                                        |                                                                                     | Points/Study                                                      | Max   | Points | Tally  |                                                            |                                                                                                                                                                                                                                                                          |                                                                                                                                                                                                                                                             |
|                                                | Single Variant Analysis                                | 1. Variant Detection Methodology<br>2. Power                                        | 0-6                                                               | 12    |        |        |                                                            |                                                                                                                                                                                                                                                                          |                                                                                                                                                                                                                                                             |
| Aggregate Variant Analysis                     | 3. Bias and confounding<br>4. Statistical Significance | 0-6                                                                                 | 12                                                                |       |        |        |                                                            |                                                                                                                                                                                                                                                                          |                                                                                                                                                                                                                                                             |
| Total Genetic Evidence Points (Maximum 12)     |                                                        |                                                                                     |                                                                   |       |        |        | 12                                                         |                                                                                                                                                                                                                                                                          |                                                                                                                                                                                                                                                             |
| Experimental Evidence                          | Function                                               | Biochemical Function                                                                | 0.5                                                               | 0 - 2 | 2      | 1.0    | 1                                                          | van Schaarenburg RA et al. 2015 Mar (25454803); Higuchi Y et al. 2013 Oct 28 (24160257); McAdam RA et al. 1988 (2894352); Petry F et al. 1997 Dec (9476130); Marquart HV et al. 2007 Jul (17513176); van Schaarenburg RA et al. 2015 Mar (25454803) <sup>21-24, 26</sup> |                                                                                                                                                                                                                                                             |
|                                                |                                                        | Protein Interaction                                                                 | 0.5                                                               | 0 - 2 |        |        |                                                            |                                                                                                                                                                                                                                                                          |                                                                                                                                                                                                                                                             |
|                                                |                                                        | Expression                                                                          | 0.5                                                               | 0 - 2 |        |        |                                                            |                                                                                                                                                                                                                                                                          |                                                                                                                                                                                                                                                             |
|                                                | Functional Alteration                                  | Cells from affected individual                                                      | 1                                                                 | 0 - 2 | 2      | 2.0    | 2                                                          | McAdam RA et al. 1988 (2894352) <sup>21</sup>                                                                                                                                                                                                                            |                                                                                                                                                                                                                                                             |
|                                                |                                                        | Engineered cells                                                                    | 0.5                                                               | 0 - 1 |        |        |                                                            |                                                                                                                                                                                                                                                                          |                                                                                                                                                                                                                                                             |
| Models & Rescue                                | Animal model                                           | 2                                                                                   | 0 - 4                                                             | 4     | 2.0    | 2      | Miura-Shimura Y et al. 2002 Aug 1 (12133956) <sup>27</sup> |                                                                                                                                                                                                                                                                          |                                                                                                                                                                                                                                                             |
|                                                | Cell culture model system                              | 1                                                                                   | 0 - 2                                                             |       |        |        |                                                            |                                                                                                                                                                                                                                                                          |                                                                                                                                                                                                                                                             |
|                                                | Rescue in animal model                                 | 2                                                                                   | 0 - 4                                                             |       |        |        |                                                            |                                                                                                                                                                                                                                                                          |                                                                                                                                                                                                                                                             |
|                                                | Rescue in engineered equivalent                        | 1                                                                                   | 0 - 2                                                             |       |        |        |                                                            |                                                                                                                                                                                                                                                                          |                                                                                                                                                                                                                                                             |
| Total Experimental Evidence Points (Maximum 6) |                                                        |                                                                                     |                                                                   |       |        |        | 5                                                          |                                                                                                                                                                                                                                                                          |                                                                                                                                                                                                                                                             |

**Figure S12: Summary of evidence supporting a relationship between C1QB and autosomal recessive immunodeficiency due to an early component of complement deficiency.**

| Assertion criteria                      | Genetic Evidence (0-12 points)                                                                 | Experimental Evidence (0-6 points)                                         | Total Points (0-18)                    | Replication Over Time (Y/N)                        |
|-----------------------------------------|------------------------------------------------------------------------------------------------|----------------------------------------------------------------------------|----------------------------------------|----------------------------------------------------|
| <b>Description</b>                      | Case-level, family segregation, or case-control data that support the gene-disease association | Gene-level experimental evidence that support the gene-disease association | Sum of Genetic & Experimental Evidence | > 2 pubs w/ convincing evidence over time (>3 yrs) |
| <b>Assigned Points</b>                  | <b>12</b>                                                                                      | <b>5</b>                                                                   | <b>17</b>                              | <b>YES</b>                                         |
| <b>CALCULATED CLASSIFICATION</b>        |                                                                                                | <b>LIMITED</b>                                                             | <b>1-6</b>                             |                                                    |
|                                         |                                                                                                | <b>MODERATE</b>                                                            | <b>7-11</b>                            |                                                    |
|                                         |                                                                                                | <b>STRONG</b>                                                              | <b>12-18</b>                           |                                                    |
|                                         |                                                                                                | <b>DEFINITIVE</b>                                                          | <b>12-18 AND replication over time</b> |                                                    |
| Valid contradictory evidence (Y/N)*     | NO                                                                                             |                                                                            |                                        |                                                    |
| <b>CALCULATED CLASSIFICATION (DATE)</b> |                                                                                                | <b>DEFINITIVE</b><br>06/13/2016                                            |                                        |                                                    |
| <b>EXPERT CURATION (DATE)</b>           |                                                                                                | <b>DEFINITIVE</b><br>01/09/2017                                            |                                        |                                                    |

**Figure S13: Summary matrix and classification for *C1QB* and autosomal recessive immunodeficiency due to an early component of complement deficiency.**

**CD3E and autosomal recessive severe combined immunodeficiency**

| Genetic Evidence                               | Evidence Type                                   | Case Information Type                                                                                  | Guidelines                                                        |       |        | Scores |       | PMIDs/Notes                                       |                                                                                                                                          |                                                                                                                                    |
|------------------------------------------------|-------------------------------------------------|--------------------------------------------------------------------------------------------------------|-------------------------------------------------------------------|-------|--------|--------|-------|---------------------------------------------------|------------------------------------------------------------------------------------------------------------------------------------------|------------------------------------------------------------------------------------------------------------------------------------|
|                                                |                                                 |                                                                                                        | Default                                                           | Range | Max    | Points | Tally |                                                   |                                                                                                                                          |                                                                                                                                    |
|                                                |                                                 |                                                                                                        |                                                                   |       |        |        |       |                                                   |                                                                                                                                          |                                                                                                                                    |
| Case-Level Data                                | Variant Evidence                                | Autosomal Dominant or X-linked Disorder                                                                | Variant is de novo                                                |       | 2      | 0-3    | 12    |                                                   |                                                                                                                                          |                                                                                                                                    |
|                                                |                                                 |                                                                                                        | Proband with predicted or proven null variant                     |       | 1.5    | 0-2    | 10    |                                                   |                                                                                                                                          |                                                                                                                                    |
|                                                |                                                 |                                                                                                        | Proband with other variant type with some evidence of gene impact |       | 0.5    | 0-1.5  | 7     |                                                   |                                                                                                                                          |                                                                                                                                    |
|                                                | Autosomal Recessive Disease                     | Two variants in trans and at least one de novo or a predicted/proven null variant                      |                                                                   | 2     | 0-3    | 12     | 6.0   | 6                                                 | Soudais C et al. 1993 Jan (8490660); de Saint Basile G et al. 2004 Nov (15546002); Fuehrer M et al. 2014 May (24515816) <sup>28-30</sup> |                                                                                                                                    |
|                                                |                                                 | Two variants (not predicted/proven null) with some evidence of gene impact in trans                    |                                                                   | 1     | 0-1.5  |        |       |                                                   |                                                                                                                                          |                                                                                                                                    |
| Segregation Evidence                           | Evidence of segregation in one or more families | LOD Score Examples                                                                                     | 3                                                                 | 5     | 0-7    | 7      | 0.0   | 0                                                 |                                                                                                                                          |                                                                                                                                    |
|                                                |                                                 |                                                                                                        | 2                                                                 | 4     |        |        |       |                                                   |                                                                                                                                          |                                                                                                                                    |
|                                                |                                                 |                                                                                                        | 1.5                                                               | 3     |        |        |       |                                                   |                                                                                                                                          |                                                                                                                                    |
|                                                |                                                 |                                                                                                        | 1                                                                 | 1.5   |        |        |       |                                                   |                                                                                                                                          |                                                                                                                                    |
|                                                |                                                 |                                                                                                        |                                                                   |       |        |        |       |                                                   |                                                                                                                                          |                                                                                                                                    |
| Case-Control Data                              | Case-Control Study Type                         | Case-Control Quality Criteria                                                                          | Guidelines                                                        |       |        | Scores |       | PMIDs/Notes                                       |                                                                                                                                          |                                                                                                                                    |
|                                                |                                                 |                                                                                                        | Points/Study                                                      | Max   | Points | Tally  |       |                                                   |                                                                                                                                          |                                                                                                                                    |
|                                                | Single Variant Analysis                         | 1. Variant Detection Methodology<br>2. Power<br>3. Bias and confounding<br>4. Statistical Significance | 0-6                                                               | 12    |        |        |       |                                                   |                                                                                                                                          |                                                                                                                                    |
| Aggregate Variant Analysis                     | 0-6                                             |                                                                                                        | 12                                                                |       |        |        |       |                                                   |                                                                                                                                          |                                                                                                                                    |
| Total Genetic Evidence Points (Maximum 12)     |                                                 |                                                                                                        |                                                                   |       |        |        | 6     |                                                   |                                                                                                                                          |                                                                                                                                    |
| Experimental Evidence                          | Function                                        | Evidence Type                                                                                          | Biochemical Function                                              |       | 0.5    | 0 - 2  | 2     | 1.5                                               | 1.5                                                                                                                                      | Manolios N et al. 1991 Jul (1828760); Thoenes G et al. 1992 Jan 5 (1370449); Fuehrer M et al. 2014 May (24515816) <sup>30-32</sup> |
|                                                |                                                 |                                                                                                        | Protein Interaction                                               |       | 0.5    | 0 - 2  |       |                                                   |                                                                                                                                          |                                                                                                                                    |
|                                                |                                                 |                                                                                                        | Expression                                                        |       | 0.5    | 0 - 2  |       |                                                   |                                                                                                                                          |                                                                                                                                    |
|                                                | Functional Alteration                           | Cells from affected individual                                                                         |                                                                   | 1     | 0 - 2  | 2      | 2.0   | 2                                                 | de Saint Basile G et al. 2004 Nov (15546002) <sup>29</sup>                                                                               |                                                                                                                                    |
|                                                |                                                 | Engineered cells                                                                                       |                                                                   | 0.5   | 0 - 1  |        |       |                                                   |                                                                                                                                          |                                                                                                                                    |
| Models & Rescue                                | Animal model                                    |                                                                                                        | 2                                                                 | 0 - 4 | 4      | 2.0    | 2     | Wang B et al. 1994 Sep 27 (7937778) <sup>33</sup> |                                                                                                                                          |                                                                                                                                    |
|                                                | Cell culture model system                       |                                                                                                        | 1                                                                 | 0 - 2 |        |        |       |                                                   |                                                                                                                                          |                                                                                                                                    |
|                                                | Rescue in animal model                          |                                                                                                        | 2                                                                 | 0 - 4 |        |        |       |                                                   |                                                                                                                                          |                                                                                                                                    |
|                                                | Rescue in engineered equivalent                 |                                                                                                        | 1                                                                 | 0 - 2 |        |        |       |                                                   |                                                                                                                                          |                                                                                                                                    |
| Total Experimental Evidence Points (Maximum 6) |                                                 |                                                                                                        |                                                                   |       |        |        | 5.5   |                                                   |                                                                                                                                          |                                                                                                                                    |

**Figure S14: Summary of evidence supporting a relationship between CD3E and autosomal recessive severe combined immunodeficiency**



| Assertion criteria                      | Genetic Evidence (0-12 points)                                                                 | Experimental Evidence (0-6 points)                                                                                                                                             | Total Points (0-18)                    | Replication Over Time (Y/N)                        |
|-----------------------------------------|------------------------------------------------------------------------------------------------|--------------------------------------------------------------------------------------------------------------------------------------------------------------------------------|----------------------------------------|----------------------------------------------------|
| <b>Description</b>                      | Case-level, family segregation, or case-control data that support the gene-disease association | Gene-level experimental evidence that support the gene-disease association                                                                                                     | Sum of Genetic & Experimental Evidence | > 2 pubs w/ convincing evidence over time (>3 yrs) |
| <b>Assigned Points</b>                  | <b>6</b>                                                                                       | <b>5.5</b>                                                                                                                                                                     | <b>11.5</b>                            | <b>YES</b>                                         |
| <b>CALCULATED CLASSIFICATION</b>        |                                                                                                | <b>LIMITED</b>                                                                                                                                                                 | <b>1-6</b>                             |                                                    |
|                                         |                                                                                                | <b>MODERATE</b>                                                                                                                                                                | <b>7-11</b>                            |                                                    |
|                                         |                                                                                                | <b>STRONG</b>                                                                                                                                                                  | <b>12-18</b>                           |                                                    |
|                                         |                                                                                                | <b>DEFINITIVE</b>                                                                                                                                                              | <b>12-18 AND replication over time</b> |                                                    |
| Valid contradictory evidence (Y/N)*     | NO                                                                                             |                                                                                                                                                                                |                                        |                                                    |
| <b>CALCULATED CLASSIFICATION (DATE)</b> |                                                                                                | <b>DEFINITIVE</b><br>05/26/2016                                                                                                                                                |                                        |                                                    |
| <b>EXPERT CURATION (DATE)</b>           |                                                                                                | <b>DEFINITIVE</b><br>01/09/2017<br>Expert agrees with decision to round up to "Definitive," and is aware of additional unpublished genetic evidence to corroborate this claim. |                                        |                                                    |

**Figure S15: Summary matrix and classification for *CD3E* and autosomal recessive severe combined immunodeficiency.**

**CHD1L and autosomal dominant renal or urinary tract malformation (CAKUT)**

| Evidence Type                              |                                                | Case Information Type                                  |                                                                                     | Guidelines                                                        |       |        | Scores |                                                         | PMIDs/Notes |
|--------------------------------------------|------------------------------------------------|--------------------------------------------------------|-------------------------------------------------------------------------------------|-------------------------------------------------------------------|-------|--------|--------|---------------------------------------------------------|-------------|
|                                            |                                                |                                                        |                                                                                     | Default                                                           | Range | Max    | Points | Tally                                                   |             |
| Genetic Evidence                           | Case-Level Data                                | Variant Evidence                                       | Autosomal Dominant or X-linked Disorder                                             | Variant is de novo                                                | 2     | 0-3    | 12     |                                                         |             |
|                                            |                                                |                                                        |                                                                                     | Proband with predicted or proven null variant                     | 1.5   | 0-2    | 10     |                                                         |             |
|                                            |                                                |                                                        |                                                                                     | Proband with other variant type with some evidence of gene impact | 0.5   | 0-1.5  | 7      | 2.5                                                     | 2.5         |
|                                            |                                                | Autosomal Recessive Disease                            | Two variants in trans and at least one de novo or a predicted/proven null variant   | 2                                                                 | 0-3   | 12     |        |                                                         |             |
|                                            |                                                |                                                        | Two variants (not predicted/proven null) with some evidence of gene impact in trans | 1                                                                 | 0-1.5 |        |        |                                                         |             |
|                                            | Segregation Evidence                           | Evidence of segregation in one or more families        | LOD Score Examples                                                                  | 3                                                                 | 5     | 0-7    | 7      |                                                         |             |
|                                            |                                                |                                                        |                                                                                     | 2                                                                 | 4     |        |        |                                                         |             |
|                                            |                                                |                                                        |                                                                                     | 1.5                                                               | 3     |        |        |                                                         |             |
|                                            |                                                |                                                        |                                                                                     | 1                                                                 | 1.5   |        |        |                                                         |             |
|                                            |                                                |                                                        |                                                                                     |                                                                   |       |        |        |                                                         |             |
| Case-Control Data                          | Case-Control Study Type                        | Case-Control Quality Criteria                          |                                                                                     | Guidelines                                                        |       |        | Scores |                                                         | PMIDs/Notes |
|                                            |                                                |                                                        |                                                                                     | Points/Study                                                      | Max   | Points | Tally  |                                                         |             |
|                                            | Single Variant Analysis                        | 1. Variant Detection Methodology<br>2. Power           |                                                                                     | 0-6                                                               | 12    |        |        |                                                         |             |
|                                            | Aggregate Variant Analysis                     | 3. Bias and confounding<br>4. Statistical Significance |                                                                                     | 0-6                                                               | 12    |        |        |                                                         |             |
| Total Genetic Evidence Points (Maximum 12) |                                                |                                                        |                                                                                     |                                                                   |       |        |        | 3.5                                                     |             |
| Experimental Evidence                      | Function                                       | Biochemical Function                                   | 0.5                                                                                 | 0 - 2                                                             | 2     | 1.0    | 1      | Brockschmidt A et al. 2012 Jun (22146311) <sup>35</sup> |             |
|                                            |                                                |                                                        | 0.5                                                                                 | 0 - 2                                                             |       |        |        |                                                         |             |
|                                            |                                                |                                                        | 0.5                                                                                 | 0 - 2                                                             |       |        |        |                                                         |             |
|                                            | Functional Alteration                          | Cells from affected individual                         | 1                                                                                   | 0 - 2                                                             | 2     |        |        |                                                         |             |
|                                            |                                                |                                                        | 0.5                                                                                 | 0 - 1                                                             |       |        |        |                                                         |             |
|                                            | Models & Rescue                                | Animal model                                           | 2                                                                                   | 0 - 4                                                             | 4     |        |        |                                                         |             |
|                                            |                                                |                                                        | 1                                                                                   | 0 - 2                                                             |       |        |        |                                                         |             |
|                                            |                                                |                                                        | 2                                                                                   | 0 - 4                                                             |       |        |        |                                                         |             |
|                                            |                                                |                                                        | 1                                                                                   | 0 - 2                                                             |       |        |        |                                                         |             |
|                                            | Total Experimental Evidence Points (Maximum 6) |                                                        |                                                                                     |                                                                   |       |        |        |                                                         | 1           |

**Figure S16: Summary of evidence supporting a relationship between CHD1L and autosomal dominant renal or urinary tract malformation (CAKUT).**

| Assertion criteria                      | Genetic Evidence (0-12 points)                                                                 | Experimental Evidence (0-6 points)                                         | Total Points (0-18)                    | Replication Over Time (Y/N)                        |
|-----------------------------------------|------------------------------------------------------------------------------------------------|----------------------------------------------------------------------------|----------------------------------------|----------------------------------------------------|
| <b>Description</b>                      | Case-level, family segregation, or case-control data that support the gene-disease association | Gene-level experimental evidence that support the gene-disease association | Sum of Genetic & Experimental Evidence | > 2 pubs w/ convincing evidence over time (>3 yrs) |
| <b>Assigned Points</b>                  | <b>2.5</b>                                                                                     | <b>1</b>                                                                   | <b>3.5</b>                             | <b>NO</b>                                          |
| <b>CALCULATED CLASSIFICATION</b>        |                                                                                                | <b>LIMITED</b>                                                             | <b>1-6</b>                             |                                                    |
|                                         |                                                                                                | <b>MODERATE</b>                                                            | <b>7-11</b>                            |                                                    |
|                                         |                                                                                                | <b>STRONG</b>                                                              | <b>12-18</b>                           |                                                    |
|                                         |                                                                                                | <b>DEFINITIVE</b>                                                          | <b>12-18 AND replication over time</b> |                                                    |
| Valid contradictory evidence (Y/N)*     | NO                                                                                             |                                                                            |                                        |                                                    |
| <b>CALCULATED CLASSIFICATION (DATE)</b> |                                                                                                | <b>LIMITED</b><br>05/25/2016                                               |                                        |                                                    |
| <b>EXPERT CURATION (DATE)</b>           |                                                                                                | <b>LIMITED</b><br>11/18/2016                                               |                                        |                                                    |

**Figure S17: Summary matrix and classification for *CHD1L* and autosomal dominant renal or urinary tract malformation (CAKUT).**

**COL2A1 and autosomal dominant Spondyloepiphyseal dysplasia (Stanescu type)**

| Genetic Evidence                               | Evidence Type                                          | Case Information Type                                                               | Guidelines                                                        |       |        | Scores |                                                                                                    | PMIDs/Notes                                                                                                                            |   |                                                                                                |
|------------------------------------------------|--------------------------------------------------------|-------------------------------------------------------------------------------------|-------------------------------------------------------------------|-------|--------|--------|----------------------------------------------------------------------------------------------------|----------------------------------------------------------------------------------------------------------------------------------------|---|------------------------------------------------------------------------------------------------|
|                                                |                                                        |                                                                                     | Default                                                           | Range | Max    | Points | Tally                                                                                              |                                                                                                                                        |   |                                                                                                |
|                                                |                                                        |                                                                                     |                                                                   |       |        |        |                                                                                                    |                                                                                                                                        |   |                                                                                                |
| Case-Level Data                                | Variant Evidence                                       | Autosomal Dominant or X-linked Disorder                                             | Variant is de novo                                                |       | 2      | 0-3    | 12                                                                                                 | 2.0                                                                                                                                    | 2 | Jurgens J et al. 2015 Oct (26183434) <sup>36</sup>                                             |
|                                                |                                                        |                                                                                     | Proband with predicted or proven null variant                     |       | 1.5    | 0-2    | 10                                                                                                 |                                                                                                                                        |   |                                                                                                |
|                                                |                                                        |                                                                                     | Proband with other variant type with some evidence of gene impact |       | 0.5    | 0-1.5  | 7                                                                                                  | 1.0                                                                                                                                    | 1 | Jurgens J et al. 2015 Oct (26183434); Hammarsjö A et al. 2016 Jan (26420734) <sup>36; 37</sup> |
|                                                | Autosomal Recessive Disease                            | Two variants in trans and at least one de novo or a predicted/proven null variant   |                                                                   | 2     | 0-3    | 12     |                                                                                                    |                                                                                                                                        |   |                                                                                                |
|                                                |                                                        | Two variants (not predicted/proven null) with some evidence of gene impact in trans |                                                                   | 1     | 0-1.5  |        |                                                                                                    |                                                                                                                                        |   |                                                                                                |
| Segregation Evidence                           | Evidence of segregation in one or more families        | LOD Score Examples                                                                  | 3                                                                 | 5     | 0-7    | 7      |                                                                                                    |                                                                                                                                        |   |                                                                                                |
|                                                |                                                        |                                                                                     | 2                                                                 | 4     |        |        |                                                                                                    |                                                                                                                                        |   |                                                                                                |
|                                                |                                                        |                                                                                     | 1.5                                                               | 3     |        |        |                                                                                                    |                                                                                                                                        |   |                                                                                                |
|                                                |                                                        |                                                                                     | 1                                                                 | 1.5   |        |        |                                                                                                    |                                                                                                                                        |   |                                                                                                |
|                                                |                                                        |                                                                                     |                                                                   |       |        |        |                                                                                                    |                                                                                                                                        |   |                                                                                                |
| Case-Control Data                              | Case-Control Study Type                                | Case-Control Quality Criteria                                                       | Guidelines                                                        |       |        | Scores |                                                                                                    | PMIDs/Notes                                                                                                                            |   |                                                                                                |
|                                                |                                                        |                                                                                     | Points/Study                                                      | Max   | Points | Tally  |                                                                                                    |                                                                                                                                        |   |                                                                                                |
|                                                | Single Variant Analysis                                | 1. Variant Detection Methodology<br>2. Power                                        | 0-6                                                               | 12    |        |        |                                                                                                    |                                                                                                                                        |   |                                                                                                |
| Aggregate Variant Analysis                     | 3. Bias and confounding<br>4. Statistical Significance | 0-6                                                                                 | 12                                                                |       |        |        |                                                                                                    |                                                                                                                                        |   |                                                                                                |
| Total Genetic Evidence Points (Maximum 12)     |                                                        |                                                                                     |                                                                   |       |        |        | 9                                                                                                  |                                                                                                                                        |   |                                                                                                |
| Experimental Evidence                          | Function                                               | Biochemical Function                                                                | 0.5                                                               | 0 - 2 | 2      |        |                                                                                                    |                                                                                                                                        |   |                                                                                                |
|                                                |                                                        | Protein Interaction                                                                 | 0.5                                                               | 0 - 2 |        |        |                                                                                                    |                                                                                                                                        |   |                                                                                                |
|                                                |                                                        | Expression                                                                          | 0.5                                                               | 0 - 2 |        |        |                                                                                                    |                                                                                                                                        |   |                                                                                                |
|                                                | Functional Alteration                                  | Cells from affected individual                                                      | 1                                                                 | 0 - 2 | 2      | 2.0    | 2                                                                                                  | Chan D et al. 1993 Jul 15 (8325895); Vandenberg P et al. 1991 Sep 1 (1881905); Garofalo S et al. 1991 Nov 1 (1946380) <sup>38-40</sup> |   |                                                                                                |
|                                                |                                                        | Engineered cells                                                                    | 0.5                                                               | 0 - 1 |        |        |                                                                                                    |                                                                                                                                        |   |                                                                                                |
| Models & Rescue                                | Animal model                                           | 2                                                                                   | 0 - 4                                                             | 4     | 4.0    | 4      | Vandenberg P et al. 1991 Sep 1 (1881905); Garofalo S et al. 1991 Nov 1 (1946380) <sup>39, 40</sup> |                                                                                                                                        |   |                                                                                                |
|                                                | Cell culture model system                              | 1                                                                                   | 0 - 2                                                             |       |        |        |                                                                                                    |                                                                                                                                        |   |                                                                                                |
|                                                | Rescue in animal model                                 | 2                                                                                   | 0 - 4                                                             |       |        |        |                                                                                                    |                                                                                                                                        |   |                                                                                                |
|                                                | Rescue in engineered equivalent                        | 1                                                                                   | 0 - 2                                                             |       |        |        |                                                                                                    |                                                                                                                                        |   |                                                                                                |
| Total Experimental Evidence Points (Maximum 6) |                                                        |                                                                                     |                                                                   |       |        |        | 6                                                                                                  |                                                                                                                                        |   |                                                                                                |

**Figure S18: Summary of evidence supporting a relationship between COL2A1 and autosomal dominant Spondyloepiphyseal dysplasia (Stanescu type).**

| Assertion criteria                      | Genetic Evidence (0-12 points)                                                                 | Experimental Evidence (0-6 points)                                         | Total Points (0-18)                    | Replication Over Time (Y/N)                        |
|-----------------------------------------|------------------------------------------------------------------------------------------------|----------------------------------------------------------------------------|----------------------------------------|----------------------------------------------------|
| <b>Description</b>                      | Case-level, family segregation, or case-control data that support the gene-disease association | Gene-level experimental evidence that support the gene-disease association | Sum of Genetic & Experimental Evidence | > 2 pubs w/ convincing evidence over time (>3 yrs) |
| <b>Assigned Points</b>                  | <b>3</b>                                                                                       | <b>6</b>                                                                   | <b>9</b>                               | <b>NO</b>                                          |
| <b>CALCULATED CLASSIFICATION</b>        |                                                                                                | <b>LIMITED</b>                                                             | <b>1-6</b>                             |                                                    |
|                                         |                                                                                                | <b>MODERATE</b>                                                            | <b>7-11</b>                            |                                                    |
|                                         |                                                                                                | <b>STRONG</b>                                                              | <b>12-18</b>                           |                                                    |
|                                         |                                                                                                | <b>DEFINITIVE</b>                                                          | <b>12-18 AND replication over time</b> |                                                    |
| Valid contradictory evidence (Y/N)*     | NO                                                                                             |                                                                            |                                        |                                                    |
| <b>CALCULATED CLASSIFICATION (DATE)</b> |                                                                                                | <b>MODERATE</b><br>05/25/2016                                              |                                        |                                                    |
| <b>EXPERT CURATION (DATE)</b>           |                                                                                                | <b>MODERATE</b><br>12/01/2016                                              |                                        |                                                    |

**Figure S19: Summary matrix and classification for *COL2A1* and autosomal dominant Spondyloepiphyseal dysplasia (Stanescu type).**

**DICER1 and autosomal dominant pleuropulmonary blastoma**

| Genetic Evidence                                      | Evidence Type                                          | Case Information Type                                                               | Guidelines                                                        |       |        | Scores |           | PMIDs/Notes                                                                                      |    |                                                                                                                                   |
|-------------------------------------------------------|--------------------------------------------------------|-------------------------------------------------------------------------------------|-------------------------------------------------------------------|-------|--------|--------|-----------|--------------------------------------------------------------------------------------------------|----|-----------------------------------------------------------------------------------------------------------------------------------|
|                                                       |                                                        |                                                                                     | Default                                                           | Range | Max    | Points | Tally     |                                                                                                  |    |                                                                                                                                   |
|                                                       |                                                        |                                                                                     |                                                                   |       |        |        |           |                                                                                                  |    |                                                                                                                                   |
| Case-Level Data                                       | Variant Evidence                                       | Autosomal Dominant or X-linked Disorder                                             | Variant is de novo                                                |       | 2      | 0-3    | 12        | 12.0                                                                                             | 12 | Hill DA et al. 2009 Aug 21 (19556464); Doros L et al. 2012 Sep (22180160); Stewart DR et al. 2014 Nov (25118636) <sup>41-43</sup> |
|                                                       |                                                        |                                                                                     | Proband with predicted or proven null variant                     |       | 1.5    | 0-2    | 10        |                                                                                                  |    |                                                                                                                                   |
|                                                       |                                                        |                                                                                     | Proband with other variant type with some evidence of gene impact |       | 0.5    | 0-1.5  | 7         |                                                                                                  |    |                                                                                                                                   |
|                                                       | Autosomal Recessive Disease                            | Two variants in trans and at least one de novo or a predicted/proven null variant   |                                                                   | 2     | 0-3    | 12     |           |                                                                                                  |    |                                                                                                                                   |
|                                                       |                                                        | Two variants (not predicted/proven null) with some evidence of gene impact in trans |                                                                   | 1     | 0-1.5  |        |           |                                                                                                  |    |                                                                                                                                   |
| Segregation Evidence                                  | Evidence of segregation in one or more families        | LOD Score Examples                                                                  | 3                                                                 | 5     | 0-7    | 7      |           |                                                                                                  |    |                                                                                                                                   |
|                                                       |                                                        |                                                                                     | 2                                                                 | 4     |        |        |           |                                                                                                  |    |                                                                                                                                   |
|                                                       |                                                        |                                                                                     | 1.5                                                               | 3     |        |        |           |                                                                                                  |    |                                                                                                                                   |
|                                                       |                                                        |                                                                                     | 1                                                                 | 1.5   |        |        |           |                                                                                                  |    |                                                                                                                                   |
|                                                       |                                                        |                                                                                     |                                                                   |       |        |        |           |                                                                                                  |    |                                                                                                                                   |
| Case-Control Data                                     | Case-Control Study Type                                | Case-Control Quality Criteria                                                       | Guidelines                                                        |       |        | Scores |           | PMIDs/Notes                                                                                      |    |                                                                                                                                   |
|                                                       |                                                        |                                                                                     | Points/Study                                                      | Max   | Points | Tally  |           |                                                                                                  |    |                                                                                                                                   |
|                                                       | Single Variant Analysis                                | 1. Variant Detection Methodology<br>2. Power                                        | 0-6                                                               | 12    |        |        |           |                                                                                                  |    |                                                                                                                                   |
| Aggregate Variant Analysis                            | 3. Bias and confounding<br>4. Statistical Significance | 0-6                                                                                 | 12                                                                |       |        |        |           |                                                                                                  |    |                                                                                                                                   |
| <b>Total Genetic Evidence Points (Maximum 12)</b>     |                                                        |                                                                                     |                                                                   |       |        |        | <b>12</b> |                                                                                                  |    |                                                                                                                                   |
| Experimental Evidence                                 | Function                                               | Biochemical Function                                                                | 0.5                                                               | 0 - 2 | 2      | 2.0    | 2         | Hill DA et al. 2009 Aug 21 (19556464); Harris KS et al. 2006 Feb 14 (16452165) <sup>41; 44</sup> |    |                                                                                                                                   |
|                                                       |                                                        |                                                                                     | 0.5                                                               | 0 - 2 |        |        |           |                                                                                                  |    |                                                                                                                                   |
|                                                       |                                                        |                                                                                     | 0.5                                                               | 0 - 2 |        |        |           |                                                                                                  |    |                                                                                                                                   |
|                                                       | Functional Alteration                                  | Cells from affected individual                                                      | 1                                                                 | 0 - 2 | 2      |        |           |                                                                                                  |    |                                                                                                                                   |
|                                                       |                                                        | Engineered cells                                                                    | 0.5                                                               | 0 - 1 |        |        |           |                                                                                                  |    |                                                                                                                                   |
|                                                       | Models & Rescue                                        | Animal model                                                                        | 2                                                                 | 0 - 4 | 4      | 2.0    | 2         |                                                                                                  |    |                                                                                                                                   |
|                                                       |                                                        | Cell culture model system                                                           | 1                                                                 | 0 - 2 |        |        |           |                                                                                                  |    |                                                                                                                                   |
| Rescue in animal model                                |                                                        | 2                                                                                   | 0 - 4                                                             |       |        |        |           |                                                                                                  |    |                                                                                                                                   |
| Rescue in engineered equivalent                       |                                                        | 1                                                                                   | 0 - 2                                                             |       |        |        |           |                                                                                                  |    |                                                                                                                                   |
| <b>Total Experimental Evidence Points (Maximum 6)</b> |                                                        |                                                                                     |                                                                   |       |        |        | <b>4</b>  |                                                                                                  |    |                                                                                                                                   |

**Figure S20: Summary of evidence supporting a relationship between *DICER1* and autosomal dominant pleuropulmonary blastoma.**

| Assertion criteria                      | Genetic Evidence (0-12 points)                                                                 | Experimental Evidence (0-6 points)                                         | Total Points (0-18)                    | Replication Over Time (Y/N)                        |
|-----------------------------------------|------------------------------------------------------------------------------------------------|----------------------------------------------------------------------------|----------------------------------------|----------------------------------------------------|
| <b>Description</b>                      | Case-level, family segregation, or case-control data that support the gene-disease association | Gene-level experimental evidence that support the gene-disease association | Sum of Genetic & Experimental Evidence | > 2 pubs w/ convincing evidence over time (>3 yrs) |
| <b>Assigned Points</b>                  | <b>12</b>                                                                                      | <b>4</b>                                                                   | <b>16</b>                              | <b>YES</b>                                         |
| <b>CALCULATED CLASSIFICATION</b>        |                                                                                                | <b>LIMITED</b>                                                             | <b>1-6</b>                             |                                                    |
|                                         |                                                                                                | <b>MODERATE</b>                                                            | <b>7-11</b>                            |                                                    |
|                                         |                                                                                                | <b>STRONG</b>                                                              | <b>12-18</b>                           |                                                    |
|                                         |                                                                                                | <b>DEFINITIVE</b>                                                          | <b>12-18 AND replication over time</b> |                                                    |
| Valid contradictory evidence (Y/N)*     | NO                                                                                             |                                                                            |                                        |                                                    |
| <b>CALCULATED CLASSIFICATION (DATE)</b> |                                                                                                | <b>DEFINITIVE</b><br>05/06/2016                                            |                                        |                                                    |
| <b>EXPERT CURATION (DATE)</b>           |                                                                                                | <b>DEFINITIVE</b><br>01/08/2017                                            |                                        |                                                    |

**Figure S21: Summary matrix and classification for *DICER1* and autosomal dominant pleuropulmonary blastoma.**

**FGFR3 and autosomal dominant achondroplasia**

| Evidence Type                                  |                                                                                     | Case Information Type                        |                                                                                   | Guidelines                                                        |       |        | Scores                                                                                     |             | PMIDs/Notes |                                                                     |                                                                                                                                                                        |                                                                                                                        |
|------------------------------------------------|-------------------------------------------------------------------------------------|----------------------------------------------|-----------------------------------------------------------------------------------|-------------------------------------------------------------------|-------|--------|--------------------------------------------------------------------------------------------|-------------|-------------|---------------------------------------------------------------------|------------------------------------------------------------------------------------------------------------------------------------------------------------------------|------------------------------------------------------------------------------------------------------------------------|
|                                                |                                                                                     |                                              |                                                                                   | Default                                                           | Range | Max    | Points                                                                                     | Tally       |             |                                                                     |                                                                                                                                                                        |                                                                                                                        |
| Genetic Evidence                               | Case-Level Data                                                                     | Variant Evidence                             | Autosomal Dominant or X-linked Disorder                                           | Variant is de novo                                                |       | 2      | 0-3                                                                                        | 12          | 10.0        | 10                                                                  | Rousseau F et al. 1994 Sep 15 (8078586); Shiang R et al. 1994 Jul 29 (7913883) <sup>45, 46</sup><br>(Additional cases are available beyond those in these references.) |                                                                                                                        |
|                                                |                                                                                     |                                              |                                                                                   | Proband with predicted or proven null variant                     |       | 1.5    | 0-2                                                                                        | 10          |             |                                                                     |                                                                                                                                                                        |                                                                                                                        |
|                                                |                                                                                     |                                              |                                                                                   | Proband with other variant type with some evidence of gene impact |       | 0.5    | 0-1.5                                                                                      | 7           | 1.0         | 1                                                                   |                                                                                                                                                                        | Rousseau F et al. 1994 Sep 15 (8078586) <sup>45</sup> (Additional cases are available beyond those in this reference.) |
|                                                |                                                                                     | Autosomal Recessive Disease                  | Two variants in trans and at least one de novo or a predicted/proven null variant |                                                                   | 2     | 0-3    | 12                                                                                         |             |             |                                                                     |                                                                                                                                                                        |                                                                                                                        |
|                                                | Two variants (not predicted/proven null) with some evidence of gene impact in trans |                                              | 1                                                                                 | 0-1.5                                                             |       |        |                                                                                            |             |             |                                                                     |                                                                                                                                                                        |                                                                                                                        |
| Segregation Evidence                           | Evidence of segregation in one or more families                                     |                                              | LOD Score Examples                                                                | 3                                                                 | 5     | 0-7    | 7                                                                                          | 2.0         | 2           | Rousseau F et al. 1994 Sep 15 (8078586) <sup>45</sup>               |                                                                                                                                                                        |                                                                                                                        |
|                                                |                                                                                     |                                              | 2                                                                                 | 4                                                                 |       |        |                                                                                            |             |             |                                                                     |                                                                                                                                                                        |                                                                                                                        |
|                                                |                                                                                     |                                              | 1.5                                                                               | 3                                                                 |       |        |                                                                                            |             |             |                                                                     |                                                                                                                                                                        |                                                                                                                        |
|                                                |                                                                                     |                                              | 1                                                                                 | 1.5                                                               |       |        |                                                                                            |             |             |                                                                     |                                                                                                                                                                        |                                                                                                                        |
|                                                |                                                                                     |                                              |                                                                                   |                                                                   |       |        |                                                                                            |             |             |                                                                     |                                                                                                                                                                        |                                                                                                                        |
| Case-Control Data                              | Case-Control Study Type                                                             | Case-Control Quality Criteria                |                                                                                   | Guidelines                                                        |       |        | Scores                                                                                     |             | PMIDs/Notes |                                                                     |                                                                                                                                                                        |                                                                                                                        |
|                                                |                                                                                     |                                              |                                                                                   | Points/Study                                                      | Max   | Points | Tally                                                                                      |             |             |                                                                     |                                                                                                                                                                        |                                                                                                                        |
|                                                | Single Variant Analysis                                                             | 1. Variant Detection Methodology<br>2. Power |                                                                                   | 0-6                                                               | 12    |        |                                                                                            |             |             |                                                                     |                                                                                                                                                                        |                                                                                                                        |
| Aggregate Variant Analysis                     | 3. Bias and confounding<br>4. Statistical Significance                              |                                              | 0-6                                                                               | 12                                                                |       |        |                                                                                            |             |             |                                                                     |                                                                                                                                                                        |                                                                                                                        |
| Total Genetic Evidence Points (Maximum 12)     |                                                                                     |                                              |                                                                                   |                                                                   |       |        |                                                                                            |             | 12          | Additional genetic evidence is available beyond this maximum score. |                                                                                                                                                                        |                                                                                                                        |
| Experimental Evidence                          | Evidence Category                                                                   | Evidence Type                                | Guidelines                                                                        |                                                                   |       | Scores |                                                                                            | PMIDs/Notes |             |                                                                     |                                                                                                                                                                        |                                                                                                                        |
|                                                |                                                                                     |                                              | Default                                                                           | Range                                                             | Max   | Points | Tally                                                                                      |             |             |                                                                     |                                                                                                                                                                        |                                                                                                                        |
|                                                | Function                                                                            | Biochemical Function                         | 0.5                                                                               | 0 - 2                                                             | 2     |        |                                                                                            |             |             |                                                                     |                                                                                                                                                                        |                                                                                                                        |
|                                                |                                                                                     | Protein Interaction                          | 0.5                                                                               | 0 - 2                                                             |       |        |                                                                                            |             |             |                                                                     |                                                                                                                                                                        |                                                                                                                        |
|                                                |                                                                                     | Expression                                   | 0.5                                                                               | 0 - 2                                                             |       |        |                                                                                            |             |             |                                                                     |                                                                                                                                                                        |                                                                                                                        |
| Functional Alteration                          | Cells from affected individual                                                      | 1                                            | 0 - 2                                                                             | 2                                                                 | 1.0   | 1      | Naski MC et al. 1998 Dec (9811582); Cho JY et al. 2004 Jan 13 (14699054) <sup>47, 48</sup> |             |             |                                                                     |                                                                                                                                                                        |                                                                                                                        |
|                                                | Engineered cells                                                                    | 0.5                                          | 0 - 1                                                                             |                                                                   |       |        |                                                                                            |             |             |                                                                     |                                                                                                                                                                        |                                                                                                                        |
| Models & Rescue                                | Animal model                                                                        | 2                                            | 0 - 4                                                                             | 4                                                                 | 2.0   | 2      | Wang Y et al. 1999 Apr 13 (10200283) <sup>49</sup>                                         |             |             |                                                                     |                                                                                                                                                                        |                                                                                                                        |
|                                                | Cell culture model system                                                           | 1                                            | 0 - 2                                                                             |                                                                   |       |        |                                                                                            |             |             |                                                                     |                                                                                                                                                                        |                                                                                                                        |
|                                                | Rescue in animal model                                                              | 2                                            | 0 - 4                                                                             |                                                                   |       |        |                                                                                            |             |             |                                                                     |                                                                                                                                                                        |                                                                                                                        |
|                                                | Rescue in engineered equivalent                                                     | 1                                            | 0 - 2                                                                             |                                                                   |       |        |                                                                                            |             |             |                                                                     |                                                                                                                                                                        |                                                                                                                        |
| Total Experimental Evidence Points (Maximum 6) |                                                                                     |                                              |                                                                                   |                                                                   |       |        |                                                                                            |             | 3           | Additional experimental data may be available.                      |                                                                                                                                                                        |                                                                                                                        |

**Figure S22: Summary of evidence supporting a relationship between *FGFR3* and autosomal dominant achondroplasia.**



| Assertion criteria                      | Genetic Evidence (0-12 points)                                                                 | Experimental Evidence (0-6 points)                                         | Total Points (0-18)                    | Replication Over Time (Y/N)                        |
|-----------------------------------------|------------------------------------------------------------------------------------------------|----------------------------------------------------------------------------|----------------------------------------|----------------------------------------------------|
| <b>Description</b>                      | Case-level, family segregation, or case-control data that support the gene-disease association | Gene-level experimental evidence that support the gene-disease association | Sum of Genetic & Experimental Evidence | > 2 pubs w/ convincing evidence over time (>3 yrs) |
| <b>Assigned Points</b>                  | <b>12</b>                                                                                      | <b>3</b>                                                                   | <b>15</b>                              | <b>YES</b>                                         |
| <b>CALCULATED CLASSIFICATION</b>        |                                                                                                | <b>LIMITED</b>                                                             | <b>1-6</b>                             |                                                    |
|                                         |                                                                                                | <b>MODERATE</b>                                                            | <b>7-11</b>                            |                                                    |
|                                         |                                                                                                | <b>STRONG</b>                                                              | <b>12-18</b>                           |                                                    |
|                                         |                                                                                                | <b>DEFINITIVE</b>                                                          | <b>12-18 AND replication over time</b> |                                                    |
| Valid contradictory evidence (Y/N)*     | NO                                                                                             |                                                                            |                                        |                                                    |
| <b>CALCULATED CLASSIFICATION (DATE)</b> |                                                                                                | <b>DEFINITIVE</b><br>04/05/2016                                            |                                        |                                                    |
| <b>EXPERT CURATION (DATE)</b>           |                                                                                                | <b>DEFINITIVE</b><br>12/01/2016                                            |                                        |                                                    |

**Figure S23: Summary matrix and classification for *FGFR3* and autosomal dominant achondroplasia.**

### HNRNPK and autosomal dominant Au-Kline syndrome

| Evidence Type                                         |                                                 | Case Information Type                                                                                  |                                                                                     | Guidelines                                                        |       |        | Scores |            | PMIDs/Notes                                      |     |                                                                                        |  |
|-------------------------------------------------------|-------------------------------------------------|--------------------------------------------------------------------------------------------------------|-------------------------------------------------------------------------------------|-------------------------------------------------------------------|-------|--------|--------|------------|--------------------------------------------------|-----|----------------------------------------------------------------------------------------|--|
|                                                       |                                                 |                                                                                                        |                                                                                     | Default                                                           | Range | Max    | Points | Tally      |                                                  |     |                                                                                        |  |
| Genetic Evidence                                      | Case-Level Data                                 | Variant Evidence                                                                                       | Autosomal Dominant or X-linked Disorder                                             | Variant is de novo                                                |       | 2      | 0-3    | 12         | 6.0                                              | 6   | Au PY et al. 2015 Oct (26173930); Lange L et al. 2016 Sep (26954065) <sup>50; 51</sup> |  |
|                                                       |                                                 |                                                                                                        |                                                                                     | Proband with predicted or proven null variant                     |       | 1.5    | 0-2    | 10         |                                                  |     |                                                                                        |  |
|                                                       |                                                 |                                                                                                        |                                                                                     | Proband with other variant type with some evidence of gene impact |       | 0.5    | 0-1.5  | 7          |                                                  |     |                                                                                        |  |
|                                                       |                                                 | Autosomal Recessive Disease                                                                            | Two variants in trans and at least one de novo or a predicted/proven null variant   |                                                                   | 2     | 0-3    | 12     |            |                                                  |     |                                                                                        |  |
|                                                       |                                                 |                                                                                                        | Two variants (not predicted/proven null) with some evidence of gene impact in trans |                                                                   | 1     | 0-1.5  |        |            |                                                  |     |                                                                                        |  |
| Segregation Evidence                                  | Evidence of segregation in one or more families | LOD Score Examples                                                                                     | 3                                                                                   | 5                                                                 | 0-7   | 7      |        |            |                                                  |     |                                                                                        |  |
|                                                       |                                                 |                                                                                                        | 2                                                                                   | 4                                                                 |       |        |        |            |                                                  |     |                                                                                        |  |
|                                                       |                                                 |                                                                                                        | 1.5                                                                                 | 3                                                                 |       |        |        |            |                                                  |     |                                                                                        |  |
|                                                       |                                                 |                                                                                                        | 1                                                                                   | 1.5                                                               |       |        |        |            |                                                  |     |                                                                                        |  |
|                                                       |                                                 |                                                                                                        |                                                                                     |                                                                   |       |        |        |            |                                                  |     |                                                                                        |  |
| Case-Control Data                                     | Case-Control Study Type                         | Case-Control Quality Criteria                                                                          |                                                                                     | Guidelines                                                        |       |        | Scores |            | PMIDs/Notes                                      |     |                                                                                        |  |
|                                                       |                                                 |                                                                                                        |                                                                                     | Points/Study                                                      | Max   | Points | Tally  |            |                                                  |     |                                                                                        |  |
|                                                       | Single Variant Analysis                         | 1. Variant Detection Methodology<br>2. Power<br>3. Bias and confounding<br>4. Statistical Significance |                                                                                     | 0-6                                                               |       | 12     |        |            |                                                  |     |                                                                                        |  |
|                                                       |                                                 |                                                                                                        |                                                                                     | 0-6                                                               |       | 12     |        |            |                                                  |     |                                                                                        |  |
| <b>Total Genetic Evidence Points (Maximum 12)</b>     |                                                 |                                                                                                        |                                                                                     |                                                                   |       |        |        | <b>6.5</b> |                                                  |     |                                                                                        |  |
| Experimental Evidence                                 | Function                                        | Biochemical Function                                                                                   |                                                                                     | 0.5                                                               | 0 - 2 | 2      | 0.5    | 0.5        | Fan X et al. 2015 Dec 7 (26638989) <sup>52</sup> |     |                                                                                        |  |
|                                                       |                                                 |                                                                                                        |                                                                                     | Protein Interaction                                               |       |        |        |            |                                                  | 0.5 | 0 - 2                                                                                  |  |
|                                                       |                                                 |                                                                                                        |                                                                                     | Expression                                                        |       |        |        |            |                                                  | 0.5 | 0 - 2                                                                                  |  |
|                                                       | Functional Alteration                           | Cells from affected individual                                                                         |                                                                                     | 1                                                                 | 0 - 2 | 2      |        |            |                                                  |     |                                                                                        |  |
|                                                       |                                                 | Engineered cells                                                                                       |                                                                                     | 0.5                                                               | 0 - 1 |        |        |            |                                                  |     |                                                                                        |  |
|                                                       | Models & Rescue                                 | Animal model                                                                                           |                                                                                     | 2                                                                 | 0 - 4 | 4      |        |            |                                                  |     |                                                                                        |  |
|                                                       |                                                 | Cell culture model system                                                                              |                                                                                     | 1                                                                 | 0 - 2 |        |        |            |                                                  |     |                                                                                        |  |
| Rescue in animal model                                |                                                 | 2                                                                                                      | 0 - 4                                                                               |                                                                   |       |        |        |            |                                                  |     |                                                                                        |  |
| Rescue in engineered equivalent                       |                                                 | 1                                                                                                      | 0 - 2                                                                               |                                                                   |       |        |        |            |                                                  |     |                                                                                        |  |
| <b>Total Experimental Evidence Points (Maximum 6)</b> |                                                 |                                                                                                        |                                                                                     |                                                                   |       |        |        | <b>0.5</b> |                                                  |     |                                                                                        |  |

**Figure S24: Summary of evidence supporting a relationship between *HNRNPK* and autosomal dominant Au-Kline syndrome.**

| Assertion criteria                      | Genetic Evidence (0-12 points)                                                                 | Experimental Evidence (0-6 points)                                         | Total Points (0-18)                    | Replication Over Time (Y/N)                        |
|-----------------------------------------|------------------------------------------------------------------------------------------------|----------------------------------------------------------------------------|----------------------------------------|----------------------------------------------------|
| <b>Description</b>                      | Case-level, family segregation, or case-control data that support the gene-disease association | Gene-level experimental evidence that support the gene-disease association | Sum of Genetic & Experimental Evidence | > 2 pubs w/ convincing evidence over time (>3 yrs) |
| <b>Assigned Points</b>                  | <b>6</b>                                                                                       | <b>0.5</b>                                                                 | <b>6.5</b>                             | <b>NO</b>                                          |
| <b>CALCULATED CLASSIFICATION</b>        |                                                                                                | <b>LIMITED</b>                                                             | <b>1-6</b>                             |                                                    |
|                                         |                                                                                                | <b>MODERATE</b>                                                            | <b>7-11</b>                            |                                                    |
|                                         |                                                                                                | <b>STRONG</b>                                                              | <b>12-18</b>                           |                                                    |
|                                         |                                                                                                | <b>DEFINITIVE</b>                                                          | <b>12-18 AND replication over time</b> |                                                    |
| Valid contradictory evidence (Y/N)*     | NO                                                                                             |                                                                            |                                        |                                                    |
| <b>CALCULATED CLASSIFICATION (DATE)</b> |                                                                                                | <b>MODERATE</b>                                                            |                                        |                                                    |
| <b>EXPERT CURATION (DATE)</b>           |                                                                                                | <b>MODERATE</b><br>11/15/2016                                              |                                        |                                                    |

**Figure S25: Summary matrix and classification for *HNRNPK* and autosomal dominant Au-Kline**

**syndrome.** Evidence is rapidly emerging supporting the association between *HNRNPK* and Au-Kline syndrome. Gallardo, et al. published a paper in 2015<sup>53</sup> describing an *Hnrnpk* +/- haploinsufficient mouse, which they developed to study its role in tumorigenesis. Personal communication with the senior author of that paper, Sean Post, in August 2016, revealed that the haploinsufficient mice appeared to have "significant reduction in overall size and had numerous structural/bone abnormalities," reminiscent of the human phenotype, though he clarified that his group is not able to formally assess them for these types of phenotypes. Additionally, we are aware of at least one additional unpublished case - this evidence is not being formally considered, as it is not part of the public domain.

**LAMB1 and autosomal recessive lissencephaly 5**

|                                                       | Evidence Type              | Case Information Type                                                                                  | Guidelines                                                        |                                                                                   |                    | Scores |          | PMIDs/Notes |                                                |   |                                                        |
|-------------------------------------------------------|----------------------------|--------------------------------------------------------------------------------------------------------|-------------------------------------------------------------------|-----------------------------------------------------------------------------------|--------------------|--------|----------|-------------|------------------------------------------------|---|--------------------------------------------------------|
|                                                       |                            |                                                                                                        | Default                                                           | Range                                                                             | Max                | Points | Tally    |             |                                                |   |                                                        |
| Genetic Evidence                                      | Case-Level Data            | Variant Evidence                                                                                       | Autosomal Dominant or X-linked Disorder                           |                                                                                   | Variant is de novo | 2      | 0-3      | 12          |                                                |   |                                                        |
|                                                       |                            |                                                                                                        | Proband with predicted or proven null variant                     |                                                                                   | 1.5                | 0-2    | 10       |             |                                                |   |                                                        |
|                                                       |                            |                                                                                                        | Proband with other variant type with some evidence of gene impact |                                                                                   | 0.5                | 0-1.5  | 7        |             |                                                |   |                                                        |
|                                                       |                            | Autosomal Recessive Disease                                                                            |                                                                   | Two variants in trans and at least one de novo or a predicted/proven null variant |                    | 2      | 0-3      | 12          | 4.0                                            | 4 | Radmanesh F et al. 2013 Mar 7 (23472759) <sup>54</sup> |
|                                                       |                            | Two variants (not predicted/proven null) with some evidence of gene impact in trans                    |                                                                   | 1                                                                                 | 0-1.5              |        |          |             |                                                |   |                                                        |
|                                                       | Segregation Evidence       |                                                                                                        | Evidence of segregation in one or more families                   | LOD Score Examples                                                                | 3                  | 5      | 0-7      | 7           | 4.0                                            | 4 | Radmanesh F et al. 2013 Mar 7 (23472759) <sup>54</sup> |
|                                                       |                            |                                                                                                        |                                                                   |                                                                                   | 2                  | 4      |          |             |                                                |   |                                                        |
|                                                       |                            |                                                                                                        |                                                                   |                                                                                   | 1.5                | 3      |          |             |                                                |   |                                                        |
|                                                       |                            |                                                                                                        |                                                                   |                                                                                   | 1                  | 1.5    |          |             |                                                |   |                                                        |
|                                                       |                            |                                                                                                        |                                                                   |                                                                                   |                    |        |          |             |                                                |   |                                                        |
| Case-Control Data                                     | Case-Control Study Type    | Case-Control Quality Criteria                                                                          | Guidelines                                                        |                                                                                   |                    | Scores |          | PMIDs/Notes |                                                |   |                                                        |
|                                                       |                            |                                                                                                        | Points/Study                                                      | Max                                                                               | Points             | Tally  |          |             |                                                |   |                                                        |
|                                                       | Single Variant Analysis    | 1. Variant Detection Methodology<br>2. Power<br>3. Bias and confounding<br>4. Statistical Significance | 0-6                                                               | 12                                                                                |                    |        |          |             |                                                |   |                                                        |
|                                                       | Aggregate Variant Analysis |                                                                                                        | 0-6                                                               | 12                                                                                |                    |        |          |             |                                                |   |                                                        |
| <b>Total Genetic Evidence Points (Maximum 12)</b>     |                            |                                                                                                        |                                                                   |                                                                                   |                    |        | <b>8</b> |             |                                                |   |                                                        |
| Experimental Evidence                                 | Evidence Category          | Evidence Type                                                                                          | Guidelines                                                        |                                                                                   |                    | Scores |          | PMIDs/Notes |                                                |   |                                                        |
|                                                       |                            |                                                                                                        | Default                                                           | Range                                                                             | Max                | Points | Tally    |             |                                                |   |                                                        |
|                                                       | Function                   | Biochemical Function                                                                                   |                                                                   | 0.5                                                                               | 0 - 2              | 2      |          |             |                                                |   |                                                        |
|                                                       |                            | Protein Interaction                                                                                    |                                                                   | 0.5                                                                               | 0 - 2              |        |          |             |                                                |   |                                                        |
|                                                       |                            | Expression                                                                                             |                                                                   | 0.5                                                                               | 0 - 2              |        |          |             |                                                |   |                                                        |
|                                                       | Functional Alteration      | Cells from affected individual                                                                         |                                                                   | 1                                                                                 | 0 - 2              | 2      |          |             |                                                |   |                                                        |
|                                                       |                            | Engineered cells                                                                                       |                                                                   | 0.5                                                                               | 0 - 1              |        |          |             |                                                |   |                                                        |
|                                                       | Models & Rescue            | Animal model                                                                                           |                                                                   | 2                                                                                 | 0 - 4              | 4      | 1.0      | 1           | Lee J et al. 2007 Jun (17525174) <sup>55</sup> |   |                                                        |
|                                                       |                            | Cell culture model system                                                                              |                                                                   | 1                                                                                 | 0 - 2              |        |          |             |                                                |   |                                                        |
|                                                       |                            | Rescue in animal model                                                                                 |                                                                   | 2                                                                                 | 0 - 4              |        |          |             |                                                |   |                                                        |
| Rescue in engineered equivalent                       |                            | 1                                                                                                      | 0 - 2                                                             |                                                                                   |                    |        |          |             |                                                |   |                                                        |
| <b>Total Experimental Evidence Points (Maximum 6)</b> |                            |                                                                                                        |                                                                   |                                                                                   |                    |        | <b>1</b> |             |                                                |   |                                                        |

**Figure S26: Summary of evidence supporting a relationship between LAMB1 and autosomal recessive lissencephaly 5.**

| Assertion criteria                      | Genetic Evidence (0-12 points)                                                                 | Experimental Evidence (0-6 points)                                         | Total Points (0-18)                    | Replication Over Time (Y/N)                        |
|-----------------------------------------|------------------------------------------------------------------------------------------------|----------------------------------------------------------------------------|----------------------------------------|----------------------------------------------------|
| <b>Description</b>                      | Case-level, family segregation, or case-control data that support the gene-disease association | Gene-level experimental evidence that support the gene-disease association | Sum of Genetic & Experimental Evidence | > 2 pubs w/ convincing evidence over time (>3 yrs) |
| <b>Assigned Points</b>                  | <b>8</b>                                                                                       | <b>1</b>                                                                   | <b>9</b>                               | <b>NO</b>                                          |
| <b>CALCULATED CLASSIFICATION</b>        |                                                                                                | <b>LIMITED</b>                                                             | <b>1-6</b>                             |                                                    |
|                                         |                                                                                                | <b>MODERATE</b>                                                            | <b>7-11</b>                            |                                                    |
|                                         |                                                                                                | <b>STRONG</b>                                                              | <b>12-18</b>                           |                                                    |
|                                         |                                                                                                | <b>DEFINITIVE</b>                                                          | <b>12-18 AND replication over time</b> |                                                    |
| Valid contradictory evidence (Y/N)*     | NO                                                                                             |                                                                            |                                        |                                                    |
| <b>CALCULATED CLASSIFICATION (DATE)</b> |                                                                                                | <b>MODERATE</b><br>11/03/2016                                              |                                        |                                                    |
| <b>EXPERT CURATION (DATE)</b>           |                                                                                                | <b>MODERATE</b><br>11/15/2016                                              |                                        |                                                    |

**Figure S27: Summary matrix and classification for *LAMB1* and autosomal recessive lissencephaly 5.**

**LBR and autosomal recessive anadysplasia-like, spontaneously remitting spondylometaphyseal dysplasia**

| Evidence Type                                  |                                                                                     | Case Information Type                                                                                  |                                                                                   | Guidelines                                                        |       |       | Scores                                               |                                                       | PMIDs/Notes                                                                                  |
|------------------------------------------------|-------------------------------------------------------------------------------------|--------------------------------------------------------------------------------------------------------|-----------------------------------------------------------------------------------|-------------------------------------------------------------------|-------|-------|------------------------------------------------------|-------------------------------------------------------|----------------------------------------------------------------------------------------------|
|                                                |                                                                                     |                                                                                                        |                                                                                   | Default                                                           | Range | Max   | Points                                               | Tally                                                 |                                                                                              |
| Genetic Evidence                               | Case-Level Data                                                                     | Variant Evidence                                                                                       | Autosomal Dominant or X-linked Disorder                                           | Variant is de novo                                                | 2     | 0-3   | 12                                                   |                                                       |                                                                                              |
|                                                |                                                                                     |                                                                                                        |                                                                                   | Proband with predicted or proven null variant                     | 1.5   | 0-2   | 10                                                   |                                                       |                                                                                              |
|                                                |                                                                                     |                                                                                                        |                                                                                   | Proband with other variant type with some evidence of gene impact | 0.5   | 0-1.5 | 7                                                    |                                                       |                                                                                              |
|                                                |                                                                                     | Autosomal Recessive Disease                                                                            | Two variants in trans and at least one de novo or a predicted/proven null variant | 2                                                                 | 0-3   | 12    | 4.0                                                  | 4                                                     | Sobreira N et al. 2015 Jan (25348816); Borovik L et al. 2013 Aug (23824842) <sup>56,57</sup> |
|                                                | Two variants (not predicted/proven null) with some evidence of gene impact in trans |                                                                                                        | 1                                                                                 | 0-1.5                                                             |       |       |                                                      |                                                       |                                                                                              |
| Segregation Evidence                           | Evidence of segregation in one or more families                                     | LOD Score Examples                                                                                     | 3                                                                                 | 5                                                                 | 0-7   | 7     |                                                      |                                                       |                                                                                              |
|                                                |                                                                                     |                                                                                                        | 2                                                                                 | 4                                                                 |       |       |                                                      |                                                       |                                                                                              |
|                                                |                                                                                     |                                                                                                        | 1.5                                                                               | 3                                                                 |       |       |                                                      |                                                       |                                                                                              |
|                                                |                                                                                     |                                                                                                        | 1                                                                                 | 1.5                                                               |       |       |                                                      |                                                       |                                                                                              |
|                                                |                                                                                     |                                                                                                        |                                                                                   |                                                                   |       |       |                                                      |                                                       |                                                                                              |
| Case-Control Data                              | Case-Control Study Type                                                             | Case-Control Quality Criteria                                                                          |                                                                                   | Guidelines                                                        |       |       | Scores                                               |                                                       | PMIDs/Notes                                                                                  |
|                                                | Single Variant Analysis                                                             | 1. Variant Detection Methodology<br>2. Power<br>3. Bias and confounding<br>4. Statistical Significance |                                                                                   | Points/Study                                                      |       | Max   | Points                                               | Tally                                                 |                                                                                              |
|                                                |                                                                                     |                                                                                                        |                                                                                   | 0-6                                                               |       | 12    |                                                      |                                                       |                                                                                              |
| Aggregate Variant Analysis                     |                                                                                     |                                                                                                        | 0-6                                                                               |                                                                   | 12    |       |                                                      |                                                       |                                                                                              |
| Total Genetic Evidence Points (Maximum 12)     |                                                                                     |                                                                                                        |                                                                                   |                                                                   |       |       |                                                      | 4                                                     |                                                                                              |
| Experimental Evidence                          | Function                                                                            | Evidence Type                                                                                          | Biochemical Function                                                              | 0.5                                                               | 0 - 2 | 2     | 1.0                                                  | 1                                                     | Olins AL et al. 2010 Jan-Feb (21327105) <sup>58</sup>                                        |
|                                                |                                                                                     |                                                                                                        | Protein Interaction                                                               | 0.5                                                               | 0 - 2 |       |                                                      |                                                       |                                                                                              |
|                                                |                                                                                     |                                                                                                        | Expression                                                                        | 0.5                                                               | 0 - 2 |       |                                                      |                                                       |                                                                                              |
|                                                | Functional Alteration                                                               | Cells from affected individual                                                                         | 1                                                                                 | 0 - 2                                                             | 2     | 0.5   | 0.5                                                  | Zwerger M et al. 2010 Jan 15 (19940018) <sup>59</sup> |                                                                                              |
|                                                |                                                                                     | Engineered cells                                                                                       | 0.5                                                                               | 0 - 1                                                             |       |       |                                                      |                                                       |                                                                                              |
| Models & Rescue                                | Animal model                                                                        | 2                                                                                                      | 0 - 4                                                                             | 4                                                                 | 1.0   | 1     | Shultz LD et al. 2003 Jan 1 (12490533) <sup>60</sup> |                                                       |                                                                                              |
|                                                | Cell culture model system                                                           | 1                                                                                                      | 0 - 2                                                                             |                                                                   |       |       |                                                      |                                                       |                                                                                              |
|                                                | Rescue in animal model                                                              | 2                                                                                                      | 0 - 4                                                                             |                                                                   |       |       |                                                      |                                                       |                                                                                              |
|                                                | Rescue in engineered equivalent                                                     | 1                                                                                                      | 0 - 2                                                                             |                                                                   |       |       |                                                      |                                                       |                                                                                              |
| Total Experimental Evidence Points (Maximum 6) |                                                                                     |                                                                                                        |                                                                                   |                                                                   |       |       |                                                      | 2.5                                                   |                                                                                              |

**Figure S28: Summary of evidence supporting a relationship between LBR and autosomal recessive anadysplasia-like, spontaneously remitting spondylometaphyseal dysplasia.**

| Assertion criteria                      | Genetic Evidence (0-12 points)                                                                 | Experimental Evidence (0-6 points)                                         | Total Points (0-18)                    | Replication Over Time (Y/N)                        |
|-----------------------------------------|------------------------------------------------------------------------------------------------|----------------------------------------------------------------------------|----------------------------------------|----------------------------------------------------|
| <b>Description</b>                      | Case-level, family segregation, or case-control data that support the gene-disease association | Gene-level experimental evidence that support the gene-disease association | Sum of Genetic & Experimental Evidence | > 2 pubs w/ convincing evidence over time (>3 yrs) |
| <b>Assigned Points</b>                  | <b>4</b>                                                                                       | <b>2.5</b>                                                                 | <b>6.5</b>                             | <b>NO</b>                                          |
| <b>CALCULATED CLASSIFICATION</b>        |                                                                                                | <b>LIMITED</b>                                                             | <b>1-6</b>                             |                                                    |
|                                         |                                                                                                | <b>MODERATE</b>                                                            | <b>7-11</b>                            |                                                    |
|                                         |                                                                                                | <b>STRONG</b>                                                              | <b>12-18</b>                           |                                                    |
|                                         |                                                                                                | <b>DEFINITIVE</b>                                                          | <b>12-18 AND replication over time</b> |                                                    |
| Valid contradictory evidence (Y/N)*     | NO                                                                                             |                                                                            |                                        |                                                    |
| <b>CALCULATED CLASSIFICATION (DATE)</b> |                                                                                                | <b>MODERATE</b>                                                            |                                        |                                                    |
| <b>EXPERT CURATION (DATE)</b>           |                                                                                                | <b>MODERATE</b><br>12/01/2016                                              |                                        |                                                    |

**Figure S27: Summary matrix and classification for *LBR* and autosomal recessive anadysplasia-like, spontaneously remitting spondylometaphyseal dysplasia.**

**MYO9A and autosomal recessive arthrogyrosis**

| Evidence Type                                  |                                                                                     | Case Information Type                        |                                                                                   | Guidelines                                                        |       |        | Scores |                                                                                                       | PMIDs/Notes                                       |
|------------------------------------------------|-------------------------------------------------------------------------------------|----------------------------------------------|-----------------------------------------------------------------------------------|-------------------------------------------------------------------|-------|--------|--------|-------------------------------------------------------------------------------------------------------|---------------------------------------------------|
|                                                |                                                                                     |                                              |                                                                                   | Default                                                           | Range | Max    | Points | Tally                                                                                                 |                                                   |
| Genetic Evidence                               | Case-Level Data                                                                     | Variant Evidence                             | Autosomal Dominant or X-linked Disorder                                           | Variant is de novo                                                | 2     | 0-3    | 12     |                                                                                                       |                                                   |
|                                                |                                                                                     |                                              |                                                                                   | Proband with predicted or proven null variant                     | 1.5   | 0-2    | 10     |                                                                                                       |                                                   |
|                                                |                                                                                     |                                              |                                                                                   | Proband with other variant type with some evidence of gene impact | 0.5   | 0-1.5  | 7      |                                                                                                       |                                                   |
|                                                |                                                                                     | Autosomal Recessive Disease                  | Two variants in trans and at least one de novo or a predicted/proven null variant | 2                                                                 | 0-3   | 12     | 2.0    | 2                                                                                                     | Bayram Y et al. 2016 Feb (26752647) <sup>61</sup> |
|                                                | Two variants (not predicted/proven null) with some evidence of gene impact in trans |                                              | 1                                                                                 | 0-1.5                                                             |       |        |        |                                                                                                       |                                                   |
| Segregation Evidence                           | Evidence of segregation in one or more families                                     | LOD Score Examples                           | 3                                                                                 | 5                                                                 | 0-7   | 7      |        |                                                                                                       |                                                   |
|                                                |                                                                                     |                                              | 2                                                                                 | 4                                                                 |       |        |        |                                                                                                       |                                                   |
|                                                |                                                                                     |                                              | 1.5                                                                               | 3                                                                 |       |        |        |                                                                                                       |                                                   |
|                                                |                                                                                     |                                              | 1                                                                                 | 1.5                                                               |       |        |        |                                                                                                       |                                                   |
|                                                |                                                                                     |                                              |                                                                                   |                                                                   |       |        |        |                                                                                                       |                                                   |
| Case-Control Data                              | Case-Control Study Type                                                             | Case-Control Quality Criteria                |                                                                                   | Guidelines                                                        |       | Scores |        | PMIDs/Notes                                                                                           |                                                   |
|                                                |                                                                                     |                                              |                                                                                   | Points/Study                                                      | Max   | Points | Tally  |                                                                                                       |                                                   |
|                                                | Single Variant Analysis                                                             | 1. Variant Detection Methodology<br>2. Power |                                                                                   | 0-6                                                               | 12    |        |        |                                                                                                       |                                                   |
| Aggregate Variant Analysis                     | 3. Bias and confounding<br>4. Statistical Significance                              |                                              | 0-6                                                                               | 12                                                                |       |        |        |                                                                                                       |                                                   |
| Total Genetic Evidence Points (Maximum 12)     |                                                                                     |                                              |                                                                                   |                                                                   |       |        | 2      |                                                                                                       |                                                   |
| Experimental Evidence                          | Function                                                                            | Biochemical Function                         | 0.5                                                                               | 0 - 2                                                             | 2     | 1.0    | 1      | Chieragatti E et al. 1998 Dec 18 (9819351); Gorman SW et al. 1999 Jul 15 (10409426) <sup>62; 63</sup> |                                                   |
|                                                |                                                                                     |                                              | 0.5                                                                               | 0 - 2                                                             |       |        |        |                                                                                                       |                                                   |
|                                                |                                                                                     |                                              | 0.5                                                                               | 0 - 2                                                             |       |        |        |                                                                                                       |                                                   |
|                                                | Functional Alteration                                                               | Cells from affected individual               | 1                                                                                 | 0 - 2                                                             | 2     | 0.5    | 0.5    | Omelchenko T et al. 2012 Feb 21 (22305756) <sup>64</sup>                                              |                                                   |
|                                                |                                                                                     |                                              | 0.5                                                                               | 0 - 1                                                             |       |        |        |                                                                                                       |                                                   |
| Models & Rescue                                | Animal model                                                                        | 2                                            | 0 - 4                                                                             | 4                                                                 |       |        |        |                                                                                                       |                                                   |
|                                                |                                                                                     | Cell culture model system                    | 1                                                                                 |                                                                   | 0 - 2 |        |        |                                                                                                       |                                                   |
|                                                |                                                                                     | Rescue in animal model                       | 2                                                                                 |                                                                   | 0 - 4 |        |        |                                                                                                       |                                                   |
|                                                |                                                                                     | Rescue in engineered equivalent              | 1                                                                                 |                                                                   | 0 - 2 |        |        |                                                                                                       |                                                   |
| Total Experimental Evidence Points (Maximum 6) |                                                                                     |                                              |                                                                                   |                                                                   |       |        | 1.5    |                                                                                                       |                                                   |

**Figure S30: Summary of evidence supporting a relationship between MYO9A and autosomal recessive arthrogyrosis.**



| Assertion criteria                         | Genetic Evidence (0-12 points)                                                                 | Experimental Evidence (0-6 points)                                                                                        | Total Points (0-18)                    | Replication Over Time (Y/N)                        |
|--------------------------------------------|------------------------------------------------------------------------------------------------|---------------------------------------------------------------------------------------------------------------------------|----------------------------------------|----------------------------------------------------|
| <b>Description</b>                         | Case-level, family segregation, or case-control data that support the gene-disease association | Gene-level experimental evidence that support the gene-disease association                                                | Sum of Genetic & Experimental Evidence | > 2 pubs w/ convincing evidence over time (>3 yrs) |
| <b>Assigned Points</b>                     | <b>2</b>                                                                                       | <b>1.5</b>                                                                                                                | <b>3.5</b>                             | <b>NO</b>                                          |
| <b>CALCULATED CLASSIFICATION</b>           |                                                                                                | <b>LIMITED</b>                                                                                                            | <b>1-6</b>                             |                                                    |
|                                            |                                                                                                | <b>MODERATE</b>                                                                                                           | <b>7-11</b>                            |                                                    |
|                                            |                                                                                                | <b>STRONG</b>                                                                                                             | <b>12-18</b>                           |                                                    |
|                                            |                                                                                                | <b>DEFINITIVE</b>                                                                                                         | <b>12-18 AND replication over time</b> |                                                    |
| <b>Valid contradictory evidence (Y/N)*</b> | NO                                                                                             |                                                                                                                           |                                        |                                                    |
| <b>CALCULATED CLASSIFICATION (DATE)</b>    |                                                                                                | <b>LIMITED</b><br>09/08/2016                                                                                              |                                        |                                                    |
| <b>EXPERT CURATION (DATE)</b>              |                                                                                                | <b>LIMITED</b><br>11/24/2016<br>The expert scored this at 3 points, which corresponded to a solid Limited classification. |                                        |                                                    |

**Figure S31: Summary matrix and classification for *MYO9A* and autosomal recessive arthrogyposis.**

**NGLY1 and autosomal recessive congenital disorder of deglycosylation**

| Genetic Evidence                               | Evidence Type             | Case Information Type                                                               | Guidelines                                                        |       |        | Scores |             | PMIDs/Notes                                        |                                                                                                                                                                                                           |
|------------------------------------------------|---------------------------|-------------------------------------------------------------------------------------|-------------------------------------------------------------------|-------|--------|--------|-------------|----------------------------------------------------|-----------------------------------------------------------------------------------------------------------------------------------------------------------------------------------------------------------|
|                                                |                           |                                                                                     | Default                                                           | Range | Max    | Points | Tally       |                                                    |                                                                                                                                                                                                           |
|                                                |                           |                                                                                     |                                                                   |       |        |        |             |                                                    |                                                                                                                                                                                                           |
| Case-Level Data                                | Variant Evidence          | Autosomal Dominant or X-linked Disorder                                             | Variant is de novo                                                |       | 2      | 0-3    | 12          |                                                    |                                                                                                                                                                                                           |
|                                                |                           | Autosomal Recessive Disease                                                         | Proband with predicted or proven null variant                     |       | 1.5    | 0-2    | 10          |                                                    |                                                                                                                                                                                                           |
|                                                |                           |                                                                                     | Proband with other variant type with some evidence of gene impact |       | 0.5    | 0-1.5  | 7           |                                                    |                                                                                                                                                                                                           |
|                                                | Segregation Evidence      | Two variants in trans and at least one de novo or a predicted/proven null variant   |                                                                   | 2     | 0-3    | 12     | 10.0        | 10                                                 | Need AC et al. 2012 Jun (22581936); Caglayan AO et al. 2015 Jan (25220016); Enns GM et al. 2014 Oct (24651605); Bosch DG et al. 2016 May (26350515); Heeley J et al. 2015 Apr (25707956) <sup>65-69</sup> |
|                                                |                           | Two variants (not predicted/proven null) with some evidence of gene impact in trans |                                                                   | 1     | 0-1.5  |        |             |                                                    |                                                                                                                                                                                                           |
| Case-Control Data                              | Case-Control Study Type   | Case-Control Quality Criteria                                                       | Guidelines                                                        |       |        | Scores |             | PMIDs/Notes                                        |                                                                                                                                                                                                           |
|                                                |                           |                                                                                     | Points/Study                                                      |       | Max    | Points | Tally       |                                                    |                                                                                                                                                                                                           |
|                                                |                           |                                                                                     | 1. Variant Detection Methodology                                  |       | 0-6    | 12     |             |                                                    |                                                                                                                                                                                                           |
|                                                |                           |                                                                                     | 2. Power                                                          |       | 0-6    | 12     |             |                                                    |                                                                                                                                                                                                           |
|                                                |                           |                                                                                     | 3. Bias and confounding                                           |       |        |        |             |                                                    |                                                                                                                                                                                                           |
| 4. Statistical Significance                    |                           | 0-6                                                                                 | 12                                                                |       |        |        |             |                                                    |                                                                                                                                                                                                           |
| Total Genetic Evidence Points (Maximum 12)     |                           |                                                                                     |                                                                   |       |        |        | 2           |                                                    |                                                                                                                                                                                                           |
| Experimental Evidence                          | Function                  | Biochemical Function                                                                | Guidelines                                                        |       | Scores |        | PMIDs/Notes |                                                    |                                                                                                                                                                                                           |
|                                                |                           |                                                                                     | Default                                                           | Range | Max    | Points |             | Tally                                              |                                                                                                                                                                                                           |
|                                                |                           |                                                                                     | 0.5                                                               | 0 - 2 | 2      | 1.0    |             | 1                                                  |                                                                                                                                                                                                           |
|                                                | Protein Interaction       | 0.5                                                                                 | 0 - 2                                                             |       |        |        |             |                                                    |                                                                                                                                                                                                           |
|                                                | Functional Alteration     | Expression                                                                          |                                                                   | 0.5   | 0 - 2  | 2      | 2.0         | 2                                                  | Need AC et al. 2012 Jun (22581936); He P et al. 2015 Aug (25900930) <sup>65; 70</sup>                                                                                                                     |
| Cells from affected individual                 |                           | 1                                                                                   | 0 - 2                                                             |       |        |        |             |                                                    |                                                                                                                                                                                                           |
| Models & Rescue                                | Engineered cells          |                                                                                     | 0.5                                                               | 0 - 1 | 4      | 4.0    | 4           | Huang C et al. 2015 Feb 3 (25605922) <sup>71</sup> |                                                                                                                                                                                                           |
|                                                | Animal model              |                                                                                     | 2                                                                 | 0 - 4 |        |        |             |                                                    |                                                                                                                                                                                                           |
|                                                | Cell culture model system |                                                                                     | 1                                                                 | 0 - 2 |        |        |             |                                                    |                                                                                                                                                                                                           |
|                                                | Rescue in animal model    |                                                                                     | 2                                                                 | 0 - 4 |        |        |             |                                                    |                                                                                                                                                                                                           |
| Rescue in engineered equivalent                |                           | 1                                                                                   | 0 - 2                                                             |       |        |        |             |                                                    |                                                                                                                                                                                                           |
| Total Experimental Evidence Points (Maximum 6) |                           |                                                                                     |                                                                   |       |        |        | 6           |                                                    |                                                                                                                                                                                                           |

**Figure S32: Summary of evidence supporting a relationship between NGLY1 and autosomal recessive congenital disorder of deglycosylation.**

| Assertion criteria                      | Genetic Evidence (0-12 points)                                                                 | Experimental Evidence (0-6 points)                                         | Total Points (0-18)                    | Replication Over Time (Y/N)                        |
|-----------------------------------------|------------------------------------------------------------------------------------------------|----------------------------------------------------------------------------|----------------------------------------|----------------------------------------------------|
| <b>Description</b>                      | Case-level, family segregation, or case-control data that support the gene-disease association | Gene-level experimental evidence that support the gene-disease association | Sum of Genetic & Experimental Evidence | > 2 pubs w/ convincing evidence over time (>3 yrs) |
| <b>Assigned Points</b>                  | <b>10</b>                                                                                      | <b>6</b>                                                                   | <b>16</b>                              | <b>YES</b>                                         |
| <b>CALCULATED CLASSIFICATION</b>        |                                                                                                | <b>LIMITED</b>                                                             | <b>1-6</b>                             |                                                    |
|                                         |                                                                                                | <b>MODERATE</b>                                                            | <b>7-11</b>                            |                                                    |
|                                         |                                                                                                | <b>STRONG</b>                                                              | <b>12-18</b>                           |                                                    |
|                                         |                                                                                                | <b>DEFINITIVE</b>                                                          | <b>12-18 AND replication over time</b> |                                                    |
| Valid contradictory evidence (Y/N)*     | NO                                                                                             |                                                                            |                                        |                                                    |
| <b>CALCULATED CLASSIFICATION (DATE)</b> |                                                                                                | <b>DEFINITIVE</b><br>06/02/2016                                            |                                        |                                                    |
| <b>EXPERT CURATION (DATE)</b>           |                                                                                                | <b>DEFINITIVE</b><br>12/01/2016                                            |                                        |                                                    |

**Figure S33: Summary matrix and classification for *NGLY1* and autosomal recessive congenital disorder of deglycosylation.**

| NHP2 and autosomal recessive dyskeratosis congenital |                                         |                                                                                     |                            |       |                                                        |        |                             |             |                                                                                                                                                                                            |
|------------------------------------------------------|-----------------------------------------|-------------------------------------------------------------------------------------|----------------------------|-------|--------------------------------------------------------|--------|-----------------------------|-------------|--------------------------------------------------------------------------------------------------------------------------------------------------------------------------------------------|
| Genetic Evidence                                     | Evidence Type                           | Case Information Type                                                               | Guidelines                 |       |                                                        | Scores |                             | PMIDs/Notes |                                                                                                                                                                                            |
|                                                      |                                         |                                                                                     | Default                    | Range | Max                                                    | Points | Tally                       |             |                                                                                                                                                                                            |
|                                                      |                                         |                                                                                     | Case-Level Data            |       | Variant Evidence                                       |        | Autosomal Recessive Disease |             |                                                                                                                                                                                            |
| Genetic Evidence                                     | Autosomal Dominant or X-linked Disorder | Variant is de novo                                                                  |                            | 2     | 0-3                                                    | 12     |                             |             |                                                                                                                                                                                            |
|                                                      |                                         | Proband with predicted or proven null variant                                       |                            | 1.5   | 0-2                                                    | 10     |                             |             |                                                                                                                                                                                            |
|                                                      |                                         | Proband with other variant type with some evidence of gene impact                   |                            | 0.5   | 0-1.5                                                  | 7      |                             |             |                                                                                                                                                                                            |
|                                                      | Autosomal Recessive Disease             | Two variants in trans and at least one de novo or a predicted/proven null variant   |                            | 2     | 0-3                                                    | 12     | 1.0                         | 2           | Vulliamy T et al. 2008 Jun 10 (18523010) <sup>72</sup> (Variant points were downgraded because later papers suggest that the null variant may still result in functional protein product.) |
|                                                      |                                         | Two variants (not predicted/proven null) with some evidence of gene impact in trans |                            | 1     | 0-1.5                                                  |        | 1.0                         |             |                                                                                                                                                                                            |
| Genetic Evidence                                     | Segregation Evidence                    | Evidence of segregation in one or more families                                     | LOD Score Examples         | 3     | 5                                                      | 7      |                             |             |                                                                                                                                                                                            |
|                                                      |                                         |                                                                                     |                            | 2     | 4                                                      |        |                             |             |                                                                                                                                                                                            |
|                                                      |                                         |                                                                                     |                            | 1.5   | 3                                                      |        | 0-7                         |             |                                                                                                                                                                                            |
|                                                      |                                         |                                                                                     |                            | 1     | 1.5                                                    |        |                             |             |                                                                                                                                                                                            |
|                                                      |                                         |                                                                                     |                            |       |                                                        |        |                             |             |                                                                                                                                                                                            |
| Genetic Evidence                                     | Case-Control Study Type                 | Case-Control Quality Criteria                                                       | Guidelines                 |       |                                                        | Scores |                             | PMIDs/Notes |                                                                                                                                                                                            |
|                                                      | Single Variant Analysis                 | 1. Variant Detection Methodology<br>2. Power                                        | Points/Study               |       | Max                                                    | Points | Tally                       |             |                                                                                                                                                                                            |
|                                                      |                                         |                                                                                     | Aggregate Variant Analysis |       | 3. Bias and confounding<br>4. Statistical Significance |        |                             |             |                                                                                                                                                                                            |
| Total Genetic Evidence Points (Maximum 12)           |                                         |                                                                                     |                            |       |                                                        |        | 2                           |             |                                                                                                                                                                                            |
| Experimental Evidence                                | Function                                | Biochemical Function                                                                |                            | 0.5   | 0 - 2                                                  | 2      | 1.5                         | 1.5         | Trahan C et al. 2010 Mar 1 (20008900); Freund A et al. 2014 Dec 4 (25467444) <sup>73, 74</sup>                                                                                             |
|                                                      |                                         | Protein Interaction                                                                 |                            | 0.5   | 0 - 2                                                  |        |                             |             |                                                                                                                                                                                            |
|                                                      |                                         | Expression                                                                          |                            | 0.5   | 0 - 2                                                  |        |                             |             |                                                                                                                                                                                            |
|                                                      | Functional Alteration                   | Cells from affected individual                                                      |                            | 1     | 0 - 2                                                  | 2      |                             |             |                                                                                                                                                                                            |
|                                                      |                                         | Engineered cells                                                                    |                            | 0.5   | 0 - 1                                                  |        |                             |             |                                                                                                                                                                                            |
| Experimental Evidence                                | Models & Rescue                         | Animal model                                                                        |                            | 2     | 0 - 4                                                  | 4      | 2.5                         | 2.5         | Dez C et al. 2001 Feb 1 (11160879); Vulliamy T et al. 2008 Jun 10 (18523010); Vulliamy T et al. 2008 Jun 10 (18523010) <sup>72, 75</sup>                                                   |
|                                                      |                                         | Cell culture model system                                                           |                            | 1     | 0 - 2                                                  |        |                             |             |                                                                                                                                                                                            |
|                                                      |                                         | Rescue in animal model                                                              |                            | 2     | 0 - 4                                                  |        |                             |             |                                                                                                                                                                                            |
|                                                      |                                         | Rescue in engineered equivalent                                                     |                            | 1     | 0 - 2                                                  |        |                             |             |                                                                                                                                                                                            |
| Total Experimental Evidence Points (Maximum 6)       |                                         |                                                                                     |                            |       |                                                        |        | 4                           |             |                                                                                                                                                                                            |

Figure S34: Summary of evidence supporting a relationship between *NHP2* and autosomal recessive dyskeratosis congenital.

| Assertion criteria                         | Genetic Evidence (0-12 points)                                                                 | Experimental Evidence (0-6 points)                                                                                                                                 | Total Points (0-18)                    | Replication Over Time (Y/N)                        |
|--------------------------------------------|------------------------------------------------------------------------------------------------|--------------------------------------------------------------------------------------------------------------------------------------------------------------------|----------------------------------------|----------------------------------------------------|
| <b>Description</b>                         | Case-level, family segregation, or case-control data that support the gene-disease association | Gene-level experimental evidence that support the gene-disease association                                                                                         | Sum of Genetic & Experimental Evidence | > 2 pubs w/ convincing evidence over time (>3 yrs) |
| <b>Assigned Points</b>                     | <b>2</b>                                                                                       | <b>4</b>                                                                                                                                                           | <b>6</b>                               | <b>NO</b>                                          |
| <b>CALCULATED CLASSIFICATION</b>           |                                                                                                | <b>LIMITED</b>                                                                                                                                                     | <b>1-6</b>                             |                                                    |
|                                            |                                                                                                | <b>MODERATE</b>                                                                                                                                                    | <b>7-11</b>                            |                                                    |
|                                            |                                                                                                | <b>STRONG</b>                                                                                                                                                      | <b>12-18</b>                           |                                                    |
|                                            |                                                                                                | <b>DEFINITIVE</b>                                                                                                                                                  | <b>12-18 AND replication over time</b> |                                                    |
| <b>Valid contradictory evidence (Y/N)*</b> | NO                                                                                             |                                                                                                                                                                    |                                        |                                                    |
| <b>CALCULATED CLASSIFICATION (DATE)</b>    |                                                                                                | <b>LIMITED</b><br>08/04/2016                                                                                                                                       |                                        |                                                    |
| <b>EXPERT CURATION (DATE)</b>              |                                                                                                | <b>LIMITED</b><br>01/25/2017<br>During expert review, the expert added more experimental evidence; however, the clinical validity classification remained limited. |                                        |                                                    |

**Figure S35: Summary matrix and classification for *NHP2* and autosomal recessive dyskeratosis congenital.**

**PALB2 and autosomal dominant hereditary breast cancer**

| Evidence Category                                 | Evidence Type                                         | Case Information Type                                                                                  | Guidelines                                                                          |       |        | Scores |                                                                                                   | PMIDs/Notes                                                |                                                     |                                                                                                                                                                                                                    |
|---------------------------------------------------|-------------------------------------------------------|--------------------------------------------------------------------------------------------------------|-------------------------------------------------------------------------------------|-------|--------|--------|---------------------------------------------------------------------------------------------------|------------------------------------------------------------|-----------------------------------------------------|--------------------------------------------------------------------------------------------------------------------------------------------------------------------------------------------------------------------|
|                                                   |                                                       |                                                                                                        | Default                                                                             | Range | Max    | Points | Tally                                                                                             |                                                            |                                                     |                                                                                                                                                                                                                    |
|                                                   |                                                       |                                                                                                        |                                                                                     |       |        |        |                                                                                                   |                                                            |                                                     |                                                                                                                                                                                                                    |
| Genetic Evidence                                  | Variant Evidence                                      | Autosomal Dominant or X-linked Disorder                                                                | Variant is de novo                                                                  |       | 2      | 0-3    | 12                                                                                                |                                                            |                                                     |                                                                                                                                                                                                                    |
|                                                   |                                                       |                                                                                                        | Proband with predicted or proven null variant                                       |       | 1.5    | 0-2    | 10                                                                                                | 7.5                                                        | 7.4                                                 | Erkko H et al. 2007 Mar 15 (17287723); Heikkinen T et al. 2009 May 1 (19383810); Casadei S et al. 2011 Mar 15 (21285249); Hartley T et al. 2014 (25225577); Janatova M et al. 2013 Dec (24136930) <sup>76-80</sup> |
|                                                   |                                                       |                                                                                                        | Proband with other variant type with some evidence of gene impact                   |       | 0.5    | 0-1.5  | 7                                                                                                 | 0.0                                                        | 0                                                   |                                                                                                                                                                                                                    |
|                                                   |                                                       | Autosomal Recessive Disease                                                                            | Two variants in trans and at least one de novo or a predicted/proven null variant   |       | 2      | 0-3    | 12                                                                                                |                                                            |                                                     |                                                                                                                                                                                                                    |
|                                                   |                                                       |                                                                                                        | Two variants (not predicted/proven null) with some evidence of gene impact in trans |       | 1      | 0-1.5  |                                                                                                   |                                                            |                                                     |                                                                                                                                                                                                                    |
|                                                   | Segregation Evidence                                  | Evidence of segregation in one or more families                                                        | LOD Score Examples                                                                  | 3     | 5      | 0-7    | 7                                                                                                 | 3.0                                                        | 3                                                   | Hartley T et al. 2014 (25225577); Janatova M et al. 2013 Dec (24136930) <sup>79, 80</sup>                                                                                                                          |
|                                                   |                                                       |                                                                                                        |                                                                                     | 2     | 4      |        |                                                                                                   |                                                            |                                                     |                                                                                                                                                                                                                    |
|                                                   |                                                       |                                                                                                        |                                                                                     | 1.5   | 3      |        |                                                                                                   |                                                            |                                                     |                                                                                                                                                                                                                    |
|                                                   |                                                       |                                                                                                        |                                                                                     | 1     | 1.5    |        |                                                                                                   |                                                            |                                                     |                                                                                                                                                                                                                    |
|                                                   |                                                       |                                                                                                        |                                                                                     |       |        |        |                                                                                                   |                                                            |                                                     |                                                                                                                                                                                                                    |
| Case-Control Data                                 | Case-Control Study Type                               | Case-Control Quality Criteria                                                                          | Guidelines                                                                          |       |        | Scores |                                                                                                   | PMIDs/Notes                                                |                                                     |                                                                                                                                                                                                                    |
|                                                   |                                                       |                                                                                                        | Points/Study                                                                        | Max   | Points | Tally  |                                                                                                   |                                                            |                                                     |                                                                                                                                                                                                                    |
|                                                   | Single Variant Analysis                               | 1. Variant Detection Methodology<br>2. Power<br>3. Bias and confounding<br>4. Statistical Significance | 0-6                                                                                 | 12    | 5.0    | 5      | Erkko H et al. 2007 Mar 15 (17287723); Heikkinen T et al. 2009 May 1 (19383810) <sup>76, 77</sup> |                                                            |                                                     |                                                                                                                                                                                                                    |
|                                                   | Aggregate Variant Analysis                            |                                                                                                        | 0-6                                                                                 | 12    | 4.0    | 4      |                                                                                                   |                                                            | Cybulski C et al. 2015 Jun (25959805) <sup>81</sup> |                                                                                                                                                                                                                    |
| <b>Total Genetic Evidence Points (Maximum 12)</b> |                                                       |                                                                                                        |                                                                                     |       |        |        | <b>17</b>                                                                                         |                                                            |                                                     |                                                                                                                                                                                                                    |
| Experimental Evidence                             | Function                                              | Biochemical Function                                                                                   | 0.5                                                                                 | 0 - 2 | 2      | 1.0    | 1                                                                                                 | Xia B et al. 2006 Jun 23 (16793542) <sup>82</sup>          |                                                     |                                                                                                                                                                                                                    |
|                                                   |                                                       | Protein Interaction                                                                                    | 0.5                                                                                 | 0 - 2 |        |        |                                                                                                   |                                                            |                                                     |                                                                                                                                                                                                                    |
|                                                   |                                                       | Expression                                                                                             | 0.5                                                                                 | 0 - 2 |        |        |                                                                                                   |                                                            |                                                     |                                                                                                                                                                                                                    |
|                                                   | Functional Alteration                                 | Cells from affected individual                                                                         | 1                                                                                   | 0 - 2 | 2      | 2.0    | 2                                                                                                 | Erkko H et al. 2007 Mar 15 (17287723) <sup>76</sup>        |                                                     |                                                                                                                                                                                                                    |
|                                                   |                                                       | Engineered cells                                                                                       | 0.5                                                                                 | 0 - 1 |        |        |                                                                                                   |                                                            |                                                     |                                                                                                                                                                                                                    |
|                                                   | Models & Rescue                                       | Animal model                                                                                           | 2                                                                                   | 0 - 4 | 4      | 2.0    | 2                                                                                                 | Bowman-Colin C et al. 2013 May 21 (23657012) <sup>83</sup> |                                                     |                                                                                                                                                                                                                    |
|                                                   |                                                       | Cell culture model system                                                                              | 1                                                                                   | 0 - 2 |        |        |                                                                                                   |                                                            |                                                     |                                                                                                                                                                                                                    |
|                                                   |                                                       | Rescue in animal model                                                                                 | 2                                                                                   | 0 - 4 |        |        |                                                                                                   |                                                            |                                                     |                                                                                                                                                                                                                    |
|                                                   |                                                       | Rescue in engineered equivalent                                                                        | 1                                                                                   | 0 - 2 |        |        |                                                                                                   |                                                            |                                                     |                                                                                                                                                                                                                    |
|                                                   | <b>Total Experimental Evidence Points (Maximum 6)</b> |                                                                                                        |                                                                                     |       |        |        |                                                                                                   | <b>5</b>                                                   |                                                     |                                                                                                                                                                                                                    |

**Figure S36: Summary of evidence supporting a relationship between *PALB2* and autosomal dominant hereditary breast cancer.**

| Assertion criteria                      | Genetic Evidence (0-12 points)                                                                 | Experimental Evidence (0-6 points)                                         | Total Points (0-18)                    | Replication Over Time (Y/N)                        |
|-----------------------------------------|------------------------------------------------------------------------------------------------|----------------------------------------------------------------------------|----------------------------------------|----------------------------------------------------|
| <b>Description</b>                      | Case-level, family segregation, or case-control data that support the gene-disease association | Gene-level experimental evidence that support the gene-disease association | Sum of Genetic & Experimental Evidence | > 2 pubs w/ convincing evidence over time (>3 yrs) |
| <b>Assigned Points</b>                  | <b>12</b>                                                                                      | <b>5</b>                                                                   | <b>17</b>                              | <b>YES</b>                                         |
| <b>CALCULATED CLASSIFICATION</b>        |                                                                                                | <b>LIMITED</b>                                                             | <b>1-6</b>                             |                                                    |
|                                         |                                                                                                | <b>MODERATE</b>                                                            | <b>7-11</b>                            |                                                    |
|                                         |                                                                                                | <b>STRONG</b>                                                              | <b>12-18</b>                           |                                                    |
|                                         |                                                                                                | <b>DEFINITIVE</b>                                                          | <b>12-18 AND replication over time</b> |                                                    |
| Valid contradictory evidence (Y/N)*     | NO                                                                                             |                                                                            |                                        |                                                    |
| <b>CALCULATED CLASSIFICATION (DATE)</b> |                                                                                                | <b>DEFINITIVE</b><br>06/02/2016                                            |                                        |                                                    |
| <b>EXPERT CURATION (DATE)</b>           |                                                                                                | <b>DEFINITIVE</b><br>12/01/2016                                            |                                        |                                                    |

**Figure S37: Summary matrix and classification for *PALB2* and autosomal dominant hereditary breast cancer.**

| PMS2 and pancreatic cancer                     |                                                 |                                |                                                                                     |                                                                   |        |        |             |             |                                                                                                                                               |  |
|------------------------------------------------|-------------------------------------------------|--------------------------------|-------------------------------------------------------------------------------------|-------------------------------------------------------------------|--------|--------|-------------|-------------|-----------------------------------------------------------------------------------------------------------------------------------------------|--|
| Evidence Type                                  | Case Information Type                           | Guidelines                     |                                                                                     |                                                                   | Scores |        | PMIDs/Notes |             |                                                                                                                                               |  |
|                                                |                                                 | Default                        | Range                                                                               | Max                                                               | Points | Tally  |             |             |                                                                                                                                               |  |
| Genetic Evidence                               | Case-Level Data                                 | Variant Evidence               | Autosomal Dominant or X-linked Disorder                                             | Variant is de novo                                                | 2      | 0-3    | 12          | 0.0         | 0                                                                                                                                             |  |
|                                                |                                                 |                                |                                                                                     | Proband with predicted or proven null variant                     | 1.5    | 0-2    | 10          | 0.0         | 0                                                                                                                                             |  |
|                                                |                                                 |                                |                                                                                     | Proband with other variant type with some evidence of gene impact | 0.5    | 0-1.5  | 7           | 0.0         | 0                                                                                                                                             |  |
|                                                |                                                 | Autosomal Recessive Disease    | Two variants in trans and at least one de novo or a predicted/proven null variant   | 2                                                                 | 0-3    | 12     | 0.0         | 0           |                                                                                                                                               |  |
|                                                |                                                 |                                | Two variants (not predicted/proven null) with some evidence of gene impact in trans | 1                                                                 | 0-1.5  |        | 0.0         |             |                                                                                                                                               |  |
| Segregation Evidence                           | Evidence of segregation in one or more families | LOD Score Examples             | 3                                                                                   | 5                                                                 | 0-7    | 7      | 0.0         | 0           |                                                                                                                                               |  |
|                                                |                                                 |                                | 2                                                                                   | 4                                                                 |        |        |             |             |                                                                                                                                               |  |
|                                                |                                                 |                                | 1.5                                                                                 | 3                                                                 |        |        |             |             |                                                                                                                                               |  |
|                                                |                                                 |                                | 1                                                                                   | 1.5                                                               |        |        |             |             |                                                                                                                                               |  |
|                                                |                                                 |                                |                                                                                     |                                                                   |        |        |             |             |                                                                                                                                               |  |
| Genetic Evidence                               | Case-Control Data                               | Case-Control Study Type        | Case-Control Quality Criteria                                                       | Guidelines                                                        |        | Scores |             | PMIDs/Notes |                                                                                                                                               |  |
|                                                |                                                 |                                |                                                                                     | Points/Study                                                      | Max    | Points | Tally       |             |                                                                                                                                               |  |
|                                                |                                                 | Single Variant Analysis        | 1. Variant Detection Methodology<br>2. Power                                        | 0-6                                                               | 12     | 0.0    | 0           |             |                                                                                                                                               |  |
|                                                |                                                 | Aggregate Variant Analysis     | 3. Bias and confounding<br>4. Statistical Significance                              | 0-6                                                               | 12     | 0.0    | 0           |             |                                                                                                                                               |  |
| Total Genetic Evidence Points (Maximum 12)     |                                                 |                                |                                                                                     |                                                                   |        |        |             | 0           | No reports of variants in this gene associated with this condition.                                                                           |  |
| Experimental Evidence                          | Evidence Category                               | Evidence Type                  | Guidelines                                                                          |                                                                   |        | Scores |             | PMIDs/Notes |                                                                                                                                               |  |
|                                                |                                                 |                                | Default                                                                             | Range                                                             | Max    | Points | Tally       |             |                                                                                                                                               |  |
|                                                | Function                                        | Biochemical Function           | 0.5                                                                                 | 0 - 2                                                             | 2      | 0.0    | 0           |             |                                                                                                                                               |  |
|                                                |                                                 | Protein Interaction            | 0.5                                                                                 | 0 - 2                                                             |        |        |             |             |                                                                                                                                               |  |
|                                                |                                                 | Expression                     | 0.5                                                                                 | 0 - 2                                                             |        |        |             |             |                                                                                                                                               |  |
|                                                | Functional Alteration                           | Cells from affected individual | 1                                                                                   | 0 - 2                                                             | 2      | 0.0    |             |             |                                                                                                                                               |  |
|                                                |                                                 | Engineered cells               | 0.5                                                                                 | 0 - 1                                                             |        |        |             |             |                                                                                                                                               |  |
|                                                | Models & Rescue                                 | Animal model                   | 2                                                                                   | 0 - 4                                                             | 4      | 0.0    |             |             |                                                                                                                                               |  |
|                                                |                                                 | Cell culture model system      | 1                                                                                   | 0 - 2                                                             |        |        |             |             |                                                                                                                                               |  |
|                                                |                                                 | Rescue in animal model         | 2                                                                                   | 0 - 4                                                             |        |        |             |             |                                                                                                                                               |  |
| Rescue in engineered equivalent                |                                                 | 1                              | 0 - 2                                                                               |                                                                   |        |        |             |             |                                                                                                                                               |  |
| Total Experimental Evidence Points (Maximum 6) |                                                 |                                |                                                                                     |                                                                   |        |        |             | 0           | Experimental evidence not evaluated. Since no genetic evidence has been reported, the classification is automatically "No Evidence Reported." |  |

Figure S38: Summary of evidence supporting a relationship between PMS2 and pancreatic cancer.



| Assertion criteria                      | Genetic Evidence (0-12 points)                                                                 | Experimental Evidence (0-6 points)                                         | Total Points (0-18)                    | Replication Over Time (Y/N)                        |
|-----------------------------------------|------------------------------------------------------------------------------------------------|----------------------------------------------------------------------------|----------------------------------------|----------------------------------------------------|
| <b>Description</b>                      | Case-level, family segregation, or case-control data that support the gene-disease association | Gene-level experimental evidence that support the gene-disease association | Sum of Genetic & Experimental Evidence | > 2 pubs w/ convincing evidence over time (>3 yrs) |
| <b>Assigned Points</b>                  |                                                                                                | <b>0</b>                                                                   | <b>0</b>                               | <b>NO</b>                                          |
| <b>CALCULATED CLASSIFICATION</b>        |                                                                                                | <b>LIMITED</b>                                                             | <b>1-6</b>                             |                                                    |
|                                         |                                                                                                | <b>MODERATE</b>                                                            | <b>7-11</b>                            |                                                    |
|                                         |                                                                                                | <b>STRONG</b>                                                              | <b>12-18</b>                           |                                                    |
|                                         |                                                                                                | <b>DEFINITIVE</b>                                                          | <b>12-18 AND replication over time</b> |                                                    |
| Valid contradictory evidence (Y/N)*     | NO                                                                                             |                                                                            |                                        |                                                    |
| <b>CALCULATED CLASSIFICATION (DATE)</b> |                                                                                                | <b>NO REPORTED EVIDENCE</b><br>07/18/2016                                  |                                        |                                                    |
| <b>EXPERT CURATION (DATE)</b>           |                                                                                                | <b>NO REPORTED EVIDENCE</b><br>12/01/2016                                  |                                        |                                                    |

**Figure S39: Summary matrix and classification for *PMS2* and pancreatic cancer.**

**PSD3 and autosomal dominant antecubital pterygium syndrome**

| Evidence Type                                  |                                                                                     | Case Information Type                        |                                                                                   | Guidelines                                                        |       |        | Scores |             | PMIDs/Notes                                                       |
|------------------------------------------------|-------------------------------------------------------------------------------------|----------------------------------------------|-----------------------------------------------------------------------------------|-------------------------------------------------------------------|-------|--------|--------|-------------|-------------------------------------------------------------------|
|                                                |                                                                                     |                                              |                                                                                   | Default                                                           | Range | Max    | Points | Tally       |                                                                   |
| Genetic Evidence                               | Case-Level Data                                                                     | Variant Evidence                             | Autosomal Dominant or X-linked Disorder                                           | Variant is de novo                                                | 2     | 0-3    | 12     |             |                                                                   |
|                                                |                                                                                     |                                              |                                                                                   | Proband with predicted or proven null variant                     | 1.5   | 0-2    | 10     |             |                                                                   |
|                                                |                                                                                     |                                              |                                                                                   | Proband with other variant type with some evidence of gene impact | 0.5   | 0-1.5  | 7      | 0.5         | 0.5                                                               |
|                                                |                                                                                     | Autosomal Recessive Disease                  | Two variants in trans and at least one de novo or a predicted/proven null variant | 2                                                                 | 0-3   | 12     |        |             |                                                                   |
|                                                | Two variants (not predicted/proven null) with some evidence of gene impact in trans |                                              | 1                                                                                 | 0-1.5                                                             |       |        |        |             |                                                                   |
| Segregation Evidence                           | Evidence of segregation in one or more families                                     | LOD Score Examples                           | 3<br>2<br>1.5<br>1                                                                | 5<br>4<br>3<br>1.5                                                | 0-7   | 7      | 4.0    | 4           | Bayram Y et al. 2016 Feb (26752647) <sup>61</sup> (LOD score 1.8) |
| Case-Control Data                              | Case-Control Study Type                                                             | Case-Control Quality Criteria                |                                                                                   | Guidelines                                                        |       |        | Scores |             | PMIDs/Notes                                                       |
|                                                |                                                                                     |                                              |                                                                                   | Points/Study                                                      | Max   | Points | Tally  |             |                                                                   |
|                                                | Single Variant Analysis                                                             | 1. Variant Detection Methodology<br>2. Power |                                                                                   | 0-6                                                               | 12    |        |        |             |                                                                   |
| Aggregate Variant Analysis                     | 3. Bias and confounding<br>4. Statistical Significance                              |                                              | 0-6                                                                               | 12                                                                |       |        |        |             |                                                                   |
| Total Genetic Evidence Points (Maximum 12)     |                                                                                     |                                              |                                                                                   |                                                                   |       |        |        | 4.5         |                                                                   |
| Experimental Evidence                          | Evidence Category                                                                   | Evidence Type                                | Guidelines                                                                        |                                                                   |       | Scores |        | PMIDs/Notes |                                                                   |
|                                                |                                                                                     |                                              | Default                                                                           | Range                                                             | Max   | Points | Tally  |             |                                                                   |
|                                                | Function                                                                            | Biochemical Function                         | 0.5                                                                               | 0 - 2                                                             | 2     |        |        |             |                                                                   |
|                                                |                                                                                     | Protein Interaction                          | 0.5                                                                               | 0 - 2                                                             |       |        |        |             |                                                                   |
|                                                |                                                                                     | Expression                                   | 0.5                                                                               | 0 - 2                                                             |       |        |        |             |                                                                   |
| Functional Alteration                          | Cells from affected individual                                                      | 1                                            | 0 - 2                                                                             | 2                                                                 |       |        |        |             |                                                                   |
|                                                | Engineered cells                                                                    | 0.5                                          | 0 - 1                                                                             |                                                                   |       |        |        |             |                                                                   |
| Models & Rescue                                | Animal model                                                                        | 2                                            | 0 - 4                                                                             | 4                                                                 |       |        |        |             |                                                                   |
|                                                | Cell culture model system                                                           | 1                                            | 0 - 2                                                                             |                                                                   |       |        |        |             |                                                                   |
|                                                | Rescue in animal model                                                              | 2                                            | 0 - 4                                                                             |                                                                   |       |        |        |             |                                                                   |
|                                                | Rescue in engineered equivalent                                                     | 1                                            | 0 - 2                                                                             |                                                                   |       |        |        |             |                                                                   |
| Total Experimental Evidence Points (Maximum 6) |                                                                                     |                                              |                                                                                   |                                                                   |       |        |        | 0           |                                                                   |

**Figure S40: Summary of evidence supporting a relationship between PSD3 and autosomal dominant antecubital pterygium syndrome.**

| Assertion criteria                      | Genetic Evidence (0-12 points)                                                                 | Experimental Evidence (0-6 points)                                         | Total Points (0-18)                    | Replication Over Time (Y/N)                        |
|-----------------------------------------|------------------------------------------------------------------------------------------------|----------------------------------------------------------------------------|----------------------------------------|----------------------------------------------------|
| <b>Description</b>                      | Case-level, family segregation, or case-control data that support the gene-disease association | Gene-level experimental evidence that support the gene-disease association | Sum of Genetic & Experimental Evidence | > 2 pubs w/ convincing evidence over time (>3 yrs) |
| <b>Assigned Points</b>                  | <b>4.5</b>                                                                                     | <b>0</b>                                                                   | <b>4.5</b>                             | <b>NO</b>                                          |
| <b>CALCULATED CLASSIFICATION</b>        |                                                                                                | <b>LIMITED</b>                                                             | <b>1-6</b>                             |                                                    |
|                                         |                                                                                                | <b>MODERATE</b>                                                            | <b>7-11</b>                            |                                                    |
|                                         |                                                                                                | <b>STRONG</b>                                                              | <b>12-18</b>                           |                                                    |
|                                         |                                                                                                | <b>DEFINITIVE</b>                                                          | <b>12-18 AND replication over time</b> |                                                    |
| Valid contradictory evidence (Y/N)*     | NO                                                                                             |                                                                            |                                        |                                                    |
| <b>CALCULATED CLASSIFICATION (DATE)</b> |                                                                                                | <b>LIMITED</b><br>06/03/2016                                               |                                        |                                                    |
| <b>EXPERT CURATION (DATE)</b>           |                                                                                                | <b>LIMITED</b><br>11/24/2016                                               |                                        |                                                    |

**Figure S41: Summary matrix and classification for *PSD3* and autosomal dominant antecubital pterygium syndrome.**

| RAD51C and autosomal recessive Fanconi anemia |                                                |                                                                                                        |                                                                                     |                                                                   |        |        |       |                                                                                              |                                                |                                                |
|-----------------------------------------------|------------------------------------------------|--------------------------------------------------------------------------------------------------------|-------------------------------------------------------------------------------------|-------------------------------------------------------------------|--------|--------|-------|----------------------------------------------------------------------------------------------|------------------------------------------------|------------------------------------------------|
|                                               | Evidence Type                                  | Case Information Type                                                                                  | Guidelines                                                                          |                                                                   |        | Scores |       | PMIDs/Notes                                                                                  |                                                |                                                |
|                                               |                                                |                                                                                                        | Default                                                                             | Range                                                             | Max    | Points | Tally |                                                                                              |                                                |                                                |
| Genetic Evidence                              | Case-Level Data                                | Variant Evidence                                                                                       | Autosomal Dominant or X-linked Disorder                                             | Variant is de novo                                                |        | 2      | 0-3   | 12                                                                                           |                                                |                                                |
|                                               |                                                |                                                                                                        |                                                                                     | Proband with predicted or proven null variant                     |        | 1.5    | 0-2   | 10                                                                                           |                                                |                                                |
|                                               |                                                |                                                                                                        |                                                                                     | Proband with other variant type with some evidence of gene impact |        | 0.5    | 0-1.5 | 7                                                                                            |                                                |                                                |
|                                               |                                                | Autosomal Recessive Disease                                                                            | Two variants in trans and at least one de novo or a predicted/proven null variant   |                                                                   | 2      | 0-3    | 12    | 1                                                                                            | Vaz F et al. 2010 May (20400963) <sup>84</sup> |                                                |
|                                               |                                                |                                                                                                        | Two variants (not predicted/proven null) with some evidence of gene impact in trans |                                                                   | 1      | 0-1.5  |       |                                                                                              |                                                | 1.0                                            |
|                                               | Segregation Evidence                           | Evidence of segregation in one or more families                                                        | LOD Score Examples                                                                  | 3                                                                 | 5      | 0-7    | 7     | 1.0                                                                                          | 1                                              | Vaz F et al. 2010 May (20400963) <sup>84</sup> |
|                                               |                                                |                                                                                                        |                                                                                     | 2                                                                 | 4      |        |       |                                                                                              |                                                |                                                |
|                                               |                                                |                                                                                                        |                                                                                     | 1.5                                                               | 3      |        |       |                                                                                              |                                                |                                                |
|                                               |                                                |                                                                                                        |                                                                                     | 1                                                                 | 1.5    |        |       |                                                                                              |                                                |                                                |
|                                               |                                                |                                                                                                        |                                                                                     |                                                                   |        |        |       |                                                                                              |                                                |                                                |
| Case-Control Data                             | Case-Control Study Type                        | Case-Control Quality Criteria                                                                          | Guidelines                                                                          |                                                                   |        | Scores |       | PMIDs/Notes                                                                                  |                                                |                                                |
|                                               |                                                |                                                                                                        | Points/Study                                                                        | Max                                                               | Points | Tally  |       |                                                                                              |                                                |                                                |
|                                               | Single Variant Analysis                        | 1. Variant Detection Methodology<br>2. Power<br>3. Bias and confounding<br>4. Statistical Significance | 0-6                                                                                 | 12                                                                |        |        |       |                                                                                              |                                                |                                                |
|                                               | Aggregate Variant Analysis                     |                                                                                                        | 0-6                                                                                 | 12                                                                |        |        |       |                                                                                              |                                                |                                                |
| Total Genetic Evidence Points (Maximum 12)    |                                                |                                                                                                        |                                                                                     |                                                                   |        |        | 2     |                                                                                              |                                                |                                                |
| Experimental Evidence                         | Function                                       | Biochemical Function                                                                                   | 0.5                                                                                 | 0 - 2                                                             | 2      | 0.5    | 0.5   | Somyajit K et al. 2012 Jan 27 (22167183) <sup>85</sup>                                       |                                                |                                                |
|                                               |                                                | Protein Interaction                                                                                    | 0.5                                                                                 | 0 - 2                                                             |        |        |       |                                                                                              |                                                |                                                |
|                                               |                                                | Expression                                                                                             | 0.5                                                                                 | 0 - 2                                                             |        |        |       |                                                                                              |                                                |                                                |
|                                               | Functional Alteration                          | Cells from affected individual                                                                         | 1                                                                                   | 0 - 2                                                             | 2      | 3.0    | 2     | Vaz F et al. 2010 May (20400963); Somyajit K et al. 2012 Jan 27 (22167183) <sup>84, 85</sup> |                                                |                                                |
|                                               |                                                | Engineered cells                                                                                       | 0.5                                                                                 | 0 - 1                                                             |        |        |       |                                                                                              |                                                |                                                |
|                                               | Models & Rescue                                | Animal model                                                                                           | 2                                                                                   | 0 - 4                                                             | 4      | 3.0    | 3     | Vaz F et al. 2010 May (20400963) <sup>84</sup>                                               |                                                |                                                |
|                                               |                                                | Cell culture model system                                                                              | 1                                                                                   | 0 - 2                                                             |        |        |       |                                                                                              |                                                |                                                |
|                                               |                                                | Rescue in animal model                                                                                 | 2                                                                                   | 0 - 4                                                             |        |        |       |                                                                                              |                                                |                                                |
|                                               |                                                | Rescue in engineered equivalent                                                                        | 1                                                                                   | 0 - 2                                                             |        |        |       |                                                                                              |                                                |                                                |
|                                               | Total Experimental Evidence Points (Maximum 6) |                                                                                                        |                                                                                     |                                                                   |        |        |       | 5.5                                                                                          |                                                |                                                |

Figure S42: Summary of evidence supporting a relationship between *RAD51C* and autosomal recessive Fanconi anemia.

| Assertion criteria                      | Genetic Evidence (0-12 points)                                                                 | Experimental Evidence (0-6 points)                                         | Total Points (0-18)                    | Replication Over Time (Y/N)                        |
|-----------------------------------------|------------------------------------------------------------------------------------------------|----------------------------------------------------------------------------|----------------------------------------|----------------------------------------------------|
| <b>Description</b>                      | Case-level, family segregation, or case-control data that support the gene-disease association | Gene-level experimental evidence that support the gene-disease association | Sum of Genetic & Experimental Evidence | > 2 pubs w/ convincing evidence over time (>3 yrs) |
| <b>Assigned Points</b>                  | 2                                                                                              | 5.5                                                                        | 7.5                                    | NO                                                 |
| <b>CALCULATED CLASSIFICATION</b>        |                                                                                                | LIMITED                                                                    | 1-6                                    |                                                    |
|                                         |                                                                                                | MODERATE                                                                   | 7-11                                   |                                                    |
|                                         |                                                                                                | STRONG                                                                     | 12-18                                  |                                                    |
|                                         |                                                                                                | DEFINITIVE                                                                 | 12-18 AND replication over time        |                                                    |
| Valid contradictory evidence (Y/N)*     | NO                                                                                             |                                                                            |                                        |                                                    |
| <b>CALCULATED CLASSIFICATION (DATE)</b> |                                                                                                | MODERATE<br>06/01/2016                                                     |                                        |                                                    |
| <b>EXPERT CURATION (DATE)</b>           |                                                                                                | MODERATE<br>01/05/2017                                                     |                                        |                                                    |

**Figure S43: Summary matrix and classification for *RAD51C* and autosomal recessive Fanconi anemia.**

***RAD51D* and autosomal dominant hereditary breast cancer**

|                                                   | Evidence Type                                         | Case Information Type                                  | Guidelines                                                                          |       |        | Scores |            | PMIDs/Notes                                                                                      |   |                                                                                                                                                                                                                                                             |
|---------------------------------------------------|-------------------------------------------------------|--------------------------------------------------------|-------------------------------------------------------------------------------------|-------|--------|--------|------------|--------------------------------------------------------------------------------------------------|---|-------------------------------------------------------------------------------------------------------------------------------------------------------------------------------------------------------------------------------------------------------------|
|                                                   |                                                       |                                                        | Default                                                                             | Range | Max    | Points | Tally      |                                                                                                  |   |                                                                                                                                                                                                                                                             |
| Genetic Evidence                                  | Variant Evidence                                      | Autosomal Dominant or X-linked Disorder                | Variant is de novo                                                                  |       | 2      | 0-3    | 12         |                                                                                                  |   |                                                                                                                                                                                                                                                             |
|                                                   |                                                       | Autosomal Recessive Disease                            | Proband with predicted or proven null variant                                       |       | 1.5    | 0-2    | 10         | 1.0                                                                                              | 1 | Baker JL et al. 2015 Feb (25445424); Loveday C et al. 2011 Aug 7 (21822267); Pelttari LM et al. 2012 Jul (22652533); Osher DJ et al. 2012 Apr 10 (22415235) <sup>86-89</sup> (Due to the common nature of the disease, opting to give 0.1 points per case.) |
|                                                   |                                                       |                                                        | Proband with other variant type with some evidence of gene impact                   |       | 0.5    | 0-1.5  | 7          |                                                                                                  |   |                                                                                                                                                                                                                                                             |
|                                                   |                                                       | Autosomal Recessive Disease                            | Two variants in trans and at least one de novo or a predicted/proven null variant   |       | 2      | 0-3    | 12         |                                                                                                  |   |                                                                                                                                                                                                                                                             |
|                                                   |                                                       |                                                        | Two variants (not predicted/proven null) with some evidence of gene impact in trans |       | 1      | 0-1.5  |            |                                                                                                  |   |                                                                                                                                                                                                                                                             |
|                                                   | Segregation Evidence                                  | Evidence of segregation in one or more families        | LOD Score Examples                                                                  | 3     | 5      | 0-7    | 7          |                                                                                                  |   |                                                                                                                                                                                                                                                             |
|                                                   |                                                       |                                                        |                                                                                     | 2     | 4      |        |            |                                                                                                  |   |                                                                                                                                                                                                                                                             |
|                                                   |                                                       |                                                        |                                                                                     | 1.5   | 3      |        |            |                                                                                                  |   |                                                                                                                                                                                                                                                             |
|                                                   |                                                       |                                                        |                                                                                     | 1     | 1.5    |        |            |                                                                                                  |   |                                                                                                                                                                                                                                                             |
|                                                   |                                                       |                                                        |                                                                                     |       |        |        |            |                                                                                                  |   |                                                                                                                                                                                                                                                             |
| Case-Level Data                                   | Case-Control Study Type                               | Case-Control Quality Criteria                          | Guidelines                                                                          |       |        | Scores |            | PMIDs/Notes                                                                                      |   |                                                                                                                                                                                                                                                             |
|                                                   |                                                       |                                                        | Points/Study                                                                        | Max   | Points | Tally  |            |                                                                                                  |   |                                                                                                                                                                                                                                                             |
|                                                   | Single Variant Analysis                               | 1. Variant Detection Methodology<br>2. Power           |                                                                                     | 0-6   | 12     |        |            |                                                                                                  |   |                                                                                                                                                                                                                                                             |
|                                                   | Aggregate Variant Analysis                            | 3. Bias and confounding<br>4. Statistical Significance |                                                                                     | 0-6   | 12     |        |            |                                                                                                  |   |                                                                                                                                                                                                                                                             |
| <b>Total Genetic Evidence Points (Maximum 12)</b> |                                                       |                                                        |                                                                                     |       |        |        | <b>4.5</b> |                                                                                                  |   |                                                                                                                                                                                                                                                             |
| Experimental Evidence                             | Function                                              | Biochemical Function                                   | 0.5                                                                                 | 0 - 2 | 2      | 1.5    | 1.5        | Schild D et al. 2000 Jun 2 (10749867); Martin RW et al. 2007 Oct 15 (17942895) <sup>90, 91</sup> |   |                                                                                                                                                                                                                                                             |
|                                                   |                                                       | Protein Interaction                                    | 0.5                                                                                 | 0 - 2 |        |        |            |                                                                                                  |   |                                                                                                                                                                                                                                                             |
|                                                   |                                                       | Expression                                             | 0.5                                                                                 | 0 - 2 |        |        |            |                                                                                                  |   |                                                                                                                                                                                                                                                             |
|                                                   | Functional Alteration                                 | Cells from affected individual                         | 1                                                                                   | 0 - 2 | 2      |        |            |                                                                                                  |   |                                                                                                                                                                                                                                                             |
|                                                   |                                                       | Engineered cells                                       | 0.5                                                                                 | 0 - 1 |        |        |            |                                                                                                  |   |                                                                                                                                                                                                                                                             |
|                                                   | Models & Rescue                                       | Animal model                                           | 2                                                                                   | 0 - 4 | 4      | 2.0    | 2          | Smiraldo PG et al. 2005 Mar 15 (15781618) <sup>92</sup>                                          |   |                                                                                                                                                                                                                                                             |
|                                                   |                                                       | Cell culture model system                              | 1                                                                                   | 0 - 2 |        |        |            |                                                                                                  |   |                                                                                                                                                                                                                                                             |
|                                                   |                                                       | Rescue in animal model                                 | 2                                                                                   | 0 - 4 |        |        |            |                                                                                                  |   |                                                                                                                                                                                                                                                             |
|                                                   |                                                       | Rescue in engineered equivalent                        | 1                                                                                   | 0 - 2 |        |        |            |                                                                                                  |   |                                                                                                                                                                                                                                                             |
|                                                   | <b>Total Experimental Evidence Points (Maximum 6)</b> |                                                        |                                                                                     |       |        |        |            | <b>3.5</b>                                                                                       |   |                                                                                                                                                                                                                                                             |

**Figure S44: Summary of evidence for a relationship between *RAD51D* and autosomal dominant hereditary breast cancer.**

| Assertion criteria                  | Genetic Evidence (0-12 points)                                                                                                                                                                                                                                                                                                                                               | Experimental Evidence (0-6 points)                                         | Total Points (0-18)                    | Replication Over Time (Y/N)                        |
|-------------------------------------|------------------------------------------------------------------------------------------------------------------------------------------------------------------------------------------------------------------------------------------------------------------------------------------------------------------------------------------------------------------------------|----------------------------------------------------------------------------|----------------------------------------|----------------------------------------------------|
| Description                         | Case-level, family segregation, or case-control data that support the gene-disease association                                                                                                                                                                                                                                                                               | Gene-level experimental evidence that support the gene-disease association | Sum of Genetic & Experimental Evidence | > 2 pubs w/ convincing evidence over time (>3 yrs) |
| Assigned Points                     | 1                                                                                                                                                                                                                                                                                                                                                                            | 3.5                                                                        | 4.5                                    | NO                                                 |
| CALCULATED CLASSIFICATION           |                                                                                                                                                                                                                                                                                                                                                                              | LIMITED                                                                    | 1-6                                    |                                                    |
|                                     |                                                                                                                                                                                                                                                                                                                                                                              | MODERATE                                                                   | 7-11                                   |                                                    |
|                                     |                                                                                                                                                                                                                                                                                                                                                                              | STRONG                                                                     | 12-18                                  |                                                    |
|                                     |                                                                                                                                                                                                                                                                                                                                                                              | DEFINITIVE                                                                 | 12-18 AND replication over time        |                                                    |
| Valid contradictory evidence (Y/N)* | YES Dowty JG et al. 2008 Nov (18058226); Jara L et al. 2010 Aug (20054644); Wickramanayake A et al. 2012 Dec (22986143); Gutiérrez-Enríquez S et al. 2014 May 1 (24130102) <sup>93-96</sup> (These studies have reported OR/HR that indicate no association between <i>RAD51D</i> and breast cancer, or found any truncating variants in breast cancer-only cases/families.) |                                                                            |                                        |                                                    |
| CALCULATED CLASSIFICATION (DATE)    |                                                                                                                                                                                                                                                                                                                                                                              | CONFLICTING EVIDENCE REPORTED                                              |                                        |                                                    |
|                                     |                                                                                                                                                                                                                                                                                                                                                                              | LIMITED                                                                    |                                        |                                                    |
| EXPERT CURATION (DATE)              |                                                                                                                                                                                                                                                                                                                                                                              | 12/01/2016                                                                 |                                        |                                                    |

**Figure S45: Summary matrix and classification for *RAD51D* and autosomal dominant hereditary breast cancer.** The discrepancy between the experts and original biocurators is due to interpretation of the case-control studies. According to the experts consulted, current studies are not large enough to address the question of whether or not variants in *RAD51D* are relevant to breast cancer. Experimental evidence shows a link between *RAD51D* and homologous recombination, a function of other genes, such as *BRCA1* and *BRCA2*, known to be involved in hereditary breast cancer.

**RPS10 and autosomal dominant Diamond-Blackfan anemia**

| Evidence Type                                  |                                                                                     | Case Information Type                        |                                                                                   | Guidelines                                                        |        |        | Scores |                                                                                                                                                        | PMIDs/Notes |                                                                                                                                        |
|------------------------------------------------|-------------------------------------------------------------------------------------|----------------------------------------------|-----------------------------------------------------------------------------------|-------------------------------------------------------------------|--------|--------|--------|--------------------------------------------------------------------------------------------------------------------------------------------------------|-------------|----------------------------------------------------------------------------------------------------------------------------------------|
|                                                |                                                                                     |                                              |                                                                                   | Default                                                           | Range  | Max    | Points | Tally                                                                                                                                                  |             |                                                                                                                                        |
| Genetic Evidence                               | Case-Level Data                                                                     | Variant Evidence                             | Autosomal Dominant or X-linked Disorder                                           | Variant is de novo                                                | 2      | 0-3    | 12     | 4.0                                                                                                                                                    | 4           | Doherty L et al. 2010 Feb 12 (20116044); Smetanina NS et al. 2015 Sep (25946618) <sup>97, 98</sup>                                     |
|                                                |                                                                                     |                                              |                                                                                   | Proband with predicted or proven null variant                     | 1.5    | 0-2    | 10     | 10.0                                                                                                                                                   | 10          | Doherty L et al. 2010 Feb 12 (20116044); Smetanina NS et al. 2015 Sep (25946618); Yazaki M et al. 2012 May (22510774) <sup>97-99</sup> |
|                                                |                                                                                     |                                              |                                                                                   | Proband with other variant type with some evidence of gene impact | 0.5    | 0-1.5  | 7      | 0.0                                                                                                                                                    | 0           |                                                                                                                                        |
|                                                |                                                                                     | Autosomal Recessive Disease                  | Two variants in trans and at least one de novo or a predicted/proven null variant | 2                                                                 | 0-3    | 12     |        |                                                                                                                                                        |             |                                                                                                                                        |
|                                                | Two variants (not predicted/proven null) with some evidence of gene impact in trans |                                              | 1                                                                                 | 0-1.5                                                             |        |        |        |                                                                                                                                                        |             |                                                                                                                                        |
| Segregation Evidence                           | Evidence of segregation in one or more families                                     | LOD Score Examples                           | 3<br>2<br>1.5<br>1                                                                | 5<br>4<br>3<br>1.5                                                | 0-7    | 7      |        |                                                                                                                                                        |             |                                                                                                                                        |
| Case-Control Data                              | Case-Control Study Type                                                             | Case-Control Quality Criteria                | Guidelines                                                                        |                                                                   |        | Scores |        | PMIDs/Notes                                                                                                                                            |             |                                                                                                                                        |
|                                                |                                                                                     |                                              | Points/Study                                                                      | Max                                                               | Points | Tally  |        |                                                                                                                                                        |             |                                                                                                                                        |
|                                                | Single Variant Analysis                                                             | 1. Variant Detection Methodology<br>2. Power | 0-6                                                                               | 12                                                                |        |        |        |                                                                                                                                                        |             |                                                                                                                                        |
| Aggregate Variant Analysis                     | 3. Bias and confounding<br>4. Statistical Significance                              | 0-6                                          | 12                                                                                |                                                                   |        |        |        |                                                                                                                                                        |             |                                                                                                                                        |
| Total Genetic Evidence Points (Maximum 12)     |                                                                                     |                                              |                                                                                   |                                                                   |        |        |        | 12                                                                                                                                                     |             |                                                                                                                                        |
| Experimental Evidence                          | Function                                                                            | Evidence Type                                | Guidelines                                                                        |                                                                   |        | Scores |        | PMIDs/Notes                                                                                                                                            |             |                                                                                                                                        |
|                                                |                                                                                     |                                              | Default                                                                           | Range                                                             | Max    | Points | Tally  |                                                                                                                                                        |             |                                                                                                                                        |
|                                                |                                                                                     | Biochemical Function                         | 0.5                                                                               | 0 - 2                                                             | 2      | 1.5    | 1.5    | Havugimana PC et al. 2012 Aug 31 (22939629); Kristensen AR et al. 2012 Sep (22863883); Doherty L et al. 2010 Feb 12 (20116044) <sup>97, 100, 101</sup> |             |                                                                                                                                        |
|                                                |                                                                                     | Protein Interaction                          | 0.5                                                                               | 0 - 2                                                             |        |        |        |                                                                                                                                                        |             |                                                                                                                                        |
|                                                |                                                                                     | Expression                                   | 0.5                                                                               | 0 - 2                                                             |        |        |        |                                                                                                                                                        |             |                                                                                                                                        |
| Functional Alteration                          | Cells from affected individual                                                      | 1                                            | 0 - 2                                                                             | 2                                                                 |        |        |        |                                                                                                                                                        |             |                                                                                                                                        |
|                                                | Engineered cells                                                                    | 0.5                                          | 0 - 1                                                                             |                                                                   |        |        |        |                                                                                                                                                        |             |                                                                                                                                        |
| Models & Rescue                                | Animal model                                                                        | 2                                            | 0 - 4                                                                             | 4                                                                 |        |        |        |                                                                                                                                                        |             |                                                                                                                                        |
|                                                | Cell culture model system                                                           | 1                                            | 0 - 2                                                                             |                                                                   |        |        |        |                                                                                                                                                        |             |                                                                                                                                        |
|                                                | Rescue in animal model                                                              | 2                                            | 0 - 4                                                                             |                                                                   |        |        |        |                                                                                                                                                        |             |                                                                                                                                        |
|                                                | Rescue in engineered equivalent                                                     | 1                                            | 0 - 2                                                                             |                                                                   |        |        |        |                                                                                                                                                        |             |                                                                                                                                        |
| Total Experimental Evidence Points (Maximum 6) |                                                                                     |                                              |                                                                                   |                                                                   |        |        |        | 1.5                                                                                                                                                    |             |                                                                                                                                        |

**Figure S46: Summary of evidence supporting a relationship between RPS10 and autosomal dominant Diamond-Blackfan anemia.**



| Assertion criteria                      | Genetic Evidence (0-12 points)                                                                 | Experimental Evidence (0-6 points)                                         | Total Points (0-18)                    | Replication Over Time (Y/N)                        |
|-----------------------------------------|------------------------------------------------------------------------------------------------|----------------------------------------------------------------------------|----------------------------------------|----------------------------------------------------|
| <b>Description</b>                      | Case-level, family segregation, or case-control data that support the gene-disease association | Gene-level experimental evidence that support the gene-disease association | Sum of Genetic & Experimental Evidence | > 2 pubs w/ convincing evidence over time (>3 yrs) |
| <b>Assigned Points</b>                  | <b>12</b>                                                                                      | <b>1.5</b>                                                                 | <b>13.5</b>                            | <b>YES</b>                                         |
| <b>CALCULATED CLASSIFICATION</b>        |                                                                                                | <b>LIMITED</b>                                                             | <b>1-6</b>                             |                                                    |
|                                         |                                                                                                | <b>MODERATE</b>                                                            | <b>7-11</b>                            |                                                    |
|                                         |                                                                                                | <b>STRONG</b>                                                              | <b>12-18</b>                           |                                                    |
|                                         |                                                                                                | <b>DEFINITIVE</b>                                                          | <b>12-18 AND replication over time</b> |                                                    |
| Valid contradictory evidence (Y/N)*     | NO                                                                                             |                                                                            |                                        |                                                    |
| <b>CALCULATED CLASSIFICATION (DATE)</b> |                                                                                                | <b>DEFINITIVE</b><br>07/04/2016                                            |                                        |                                                    |
| <b>EXPERT CURATION (DATE)</b>           |                                                                                                | <b>DEFINITIVE</b><br>01/19/2017                                            |                                        |                                                    |

**Figure S47: Summary matrix and classification for *RPS10* and autosomal dominant Diamond-Blackfan anemia.**

**RPS24 and autosomal dominant Diamond-Blackfan anemia**

| Genetic Evidence                               | Case-Level Data                                        | Evidence Type                                | Case Information Type                                                               | Guidelines         |        |        | Scores |                                                                                                                                                    | PMIDs/Notes                                                                                                                                    |
|------------------------------------------------|--------------------------------------------------------|----------------------------------------------|-------------------------------------------------------------------------------------|--------------------|--------|--------|--------|----------------------------------------------------------------------------------------------------------------------------------------------------|------------------------------------------------------------------------------------------------------------------------------------------------|
|                                                |                                                        |                                              |                                                                                     | Default            | Range  | Max    | Points | Tally                                                                                                                                              |                                                                                                                                                |
|                                                |                                                        |                                              |                                                                                     |                    |        |        |        |                                                                                                                                                    |                                                                                                                                                |
| Genetic Evidence                               | Case-Level Data                                        | Autosomal Dominant or X-linked Disorder      | Variant is de novo                                                                  | 2                  | 0-3    | 12     | 6.0    | 6                                                                                                                                                  | Quarello P et al. 2010 Feb (19773262); Landowski M et al. 2013 Nov (23812780); Smetanina NS et al. 2015 Sep (25946618) <sup>98, 102, 103</sup> |
|                                                |                                                        |                                              | Proband with predicted or proven null variant                                       | 1.5                | 0-2    | 10     | 4.5    | 4.5                                                                                                                                                | Gazda HT et al. 2006 Dec (17186470) <sup>104</sup>                                                                                             |
|                                                |                                                        |                                              | Proband with other variant type with some evidence of gene impact                   | 0.5                | 0-1.5  | 7      |        |                                                                                                                                                    |                                                                                                                                                |
|                                                |                                                        | Autosomal Recessive Disease                  | Two variants in trans and at least one de novo or a predicted/proven null variant   | 2                  | 0-3    | 12     |        |                                                                                                                                                    |                                                                                                                                                |
|                                                |                                                        |                                              | Two variants (not predicted/proven null) with some evidence of gene impact in trans | 1                  | 0-1.5  |        |        |                                                                                                                                                    |                                                                                                                                                |
| Segregation Evidence                           | Evidence of segregation in one or more families        | LOD Score Examples                           | 3<br>2<br>1.5<br>1                                                                  | 5<br>4<br>3<br>1.5 | 0-7    | 7      |        |                                                                                                                                                    |                                                                                                                                                |
| Case-Control Data                              | Case-Control Study Type                                | Case-Control Quality Criteria                | Guidelines                                                                          |                    |        | Scores |        | PMIDs/Notes                                                                                                                                        |                                                                                                                                                |
|                                                |                                                        |                                              | Points/Study                                                                        | Max                | Points | Tally  |        |                                                                                                                                                    |                                                                                                                                                |
|                                                | Single Variant Analysis                                | 1. Variant Detection Methodology<br>2. Power | 0-6                                                                                 | 12                 |        |        |        |                                                                                                                                                    |                                                                                                                                                |
| Aggregate Variant Analysis                     | 3. Bias and confounding<br>4. Statistical Significance | 0-6                                          | 12                                                                                  |                    |        |        |        |                                                                                                                                                    |                                                                                                                                                |
| Total Genetic Evidence Points (Maximum 12)     |                                                        |                                              |                                                                                     |                    |        |        |        | 10.5                                                                                                                                               |                                                                                                                                                |
| Experimental Evidence                          | Function                                               | Biochemical Function                         | 0.5                                                                                 | 0 - 2              | 2      | 1.5    | 1.5    | Choesmel V et al. 2008 May 1 (18230666); Havugimana PC et al. 2012 Aug 31 (22939629); Gazda HT et al. 2006 Dec (17186470) <sup>100, 104, 105</sup> |                                                                                                                                                |
|                                                |                                                        | Protein Interaction                          | 0.5                                                                                 | 0 - 2              |        |        |        |                                                                                                                                                    |                                                                                                                                                |
|                                                | Expression                                             | 0.5                                          | 0 - 2                                                                               |                    |        |        |        |                                                                                                                                                    |                                                                                                                                                |
|                                                | Functional Alteration                                  | Cells from affected individual               | 1                                                                                   | 0 - 2              | 2      | 2.0    | 2      | Choesmel V et al. 2008 May 1 (18230666) <sup>105</sup>                                                                                             |                                                                                                                                                |
|                                                |                                                        | Engineered cells                             | 0.5                                                                                 | 0 - 1              |        |        |        |                                                                                                                                                    |                                                                                                                                                |
| Models & Rescue                                | Animal model                                           | 2                                            | 0 - 4                                                                               | 4                  |        |        |        |                                                                                                                                                    |                                                                                                                                                |
|                                                | Cell culture model system                              | 1                                            | 0 - 2                                                                               |                    |        |        |        |                                                                                                                                                    |                                                                                                                                                |
|                                                | Rescue in animal model                                 | 2                                            | 0 - 4                                                                               |                    |        |        |        |                                                                                                                                                    |                                                                                                                                                |
|                                                | Rescue in engineered equivalent                        | 1                                            | 0 - 2                                                                               |                    |        |        |        |                                                                                                                                                    |                                                                                                                                                |
| Total Experimental Evidence Points (Maximum 6) |                                                        |                                              |                                                                                     |                    |        |        |        | 3.5                                                                                                                                                |                                                                                                                                                |

**Figure S48: Summary of evidence supporting a relationship between RPS24 and autosomal dominant Diamond-Blackfan anemia.**

| Assertion criteria                      | Genetic Evidence (0-12 points)                                                                 | Experimental Evidence (0-6 points)                                         | Total Points (0-18)                    | Replication Over Time (Y/N)                        |
|-----------------------------------------|------------------------------------------------------------------------------------------------|----------------------------------------------------------------------------|----------------------------------------|----------------------------------------------------|
| <b>Description</b>                      | Case-level, family segregation, or case-control data that support the gene-disease association | Gene-level experimental evidence that support the gene-disease association | Sum of Genetic & Experimental Evidence | > 2 pubs w/ convincing evidence over time (>3 yrs) |
| <b>Assigned Points</b>                  | <b>10.5</b>                                                                                    | <b>3.5</b>                                                                 | <b>14</b>                              | <b>YES</b>                                         |
| <b>CALCULATED CLASSIFICATION</b>        |                                                                                                | <b>LIMITED</b>                                                             | <b>1-6</b>                             |                                                    |
|                                         |                                                                                                | <b>MODERATE</b>                                                            | <b>7-11</b>                            |                                                    |
|                                         |                                                                                                | <b>STRONG</b>                                                              | <b>12-18</b>                           |                                                    |
|                                         |                                                                                                | <b>DEFINITIVE</b>                                                          | <b>12-18 AND replication over time</b> |                                                    |
| Valid contradictory evidence (Y/N)*     | NO                                                                                             |                                                                            |                                        |                                                    |
| <b>CALCULATED CLASSIFICATION (DATE)</b> |                                                                                                | <b>DEFINITIVE</b><br>07/04/2016                                            |                                        |                                                    |
| <b>EXPERT CURATION (DATE)</b>           |                                                                                                | <b>DEFINITIVE</b><br>01/17/2017                                            |                                        |                                                    |

**Figure S49: Summary matrix and classification for *RPS24* and autosomal dominant Diamond-Blackfan anemia.**

**SCN4B and autosomal dominant Long QT Syndrome**

| Evidence Type                                  |                                                                                     | Case Information Type                        |                                                                                   | Guidelines                                                        |        |        | Scores |             | PMIDs/Notes                                                                                                         |
|------------------------------------------------|-------------------------------------------------------------------------------------|----------------------------------------------|-----------------------------------------------------------------------------------|-------------------------------------------------------------------|--------|--------|--------|-------------|---------------------------------------------------------------------------------------------------------------------|
|                                                |                                                                                     |                                              |                                                                                   | Default                                                           | Range  | Max    | Points | Tally       |                                                                                                                     |
| Genetic Evidence                               | Case-Level Data                                                                     | Variant Evidence                             | Autosomal Dominant or X-linked Disorder                                           | Variant is de novo                                                | 2      | 0-3    | 12     |             |                                                                                                                     |
|                                                |                                                                                     |                                              |                                                                                   | Proband with predicted or proven null variant                     | 1.5    | 0-2    | 10     |             |                                                                                                                     |
|                                                |                                                                                     |                                              |                                                                                   | Proband with other variant type with some evidence of gene impact | 0.5    | 0-1.5  | 7      | 1.0         | 1                                                                                                                   |
|                                                |                                                                                     | Autosomal Recessive Disease                  | Two variants in trans and at least one de novo or a predicted/proven null variant | 2                                                                 | 0-3    | 12     |        |             |                                                                                                                     |
|                                                | Two variants (not predicted/proven null) with some evidence of gene impact in trans |                                              | 1                                                                                 | 0-1.5                                                             |        |        |        |             |                                                                                                                     |
| Segregation Evidence                           | Evidence of segregation in one or more families                                     | LOD Score Examples                           | 3<br>2<br>1.5<br>1                                                                | 5<br>4<br>3<br>1.5                                                | 0-7    | 7      | 1.0    | 1           | Medeiros-Domingo A et al. 2007 Jul 10 (17592081) <sup>106</sup>                                                     |
| Case-Control Data                              | Case-Control Study Type                                                             | Case-Control Quality Criteria                | Guidelines                                                                        |                                                                   |        | Scores |        | PMIDs/Notes |                                                                                                                     |
|                                                |                                                                                     |                                              | Points/Study                                                                      | Max                                                               | Points | Tally  |        |             |                                                                                                                     |
|                                                | Single Variant Analysis                                                             | 1. Variant Detection Methodology<br>2. Power | 0-6                                                                               | 12                                                                |        |        |        |             |                                                                                                                     |
| Aggregate Variant Analysis                     | 3. Bias and confounding<br>4. Statistical Significance                              | 0-6                                          | 12                                                                                |                                                                   |        |        |        |             |                                                                                                                     |
| Total Genetic Evidence Points (Maximum 12)     |                                                                                     |                                              |                                                                                   |                                                                   |        |        | 3      |             |                                                                                                                     |
| Experimental Evidence                          | Function                                                                            | Evidence Type                                | Biochemical Function                                                              | 0.5                                                               | 0 - 2  | 2      | 1.0    | 1           | Medeiros-Domingo A et al. 2007 Jul 10 (17592081) <sup>106</sup> (8x increase in late sodium current by mutant form) |
|                                                |                                                                                     |                                              | Protein Interaction                                                               | 0.5                                                               | 0 - 2  |        |        |             |                                                                                                                     |
|                                                | Expression                                                                          |                                              | 0.5                                                                               | 0 - 2                                                             |        |        |        |             |                                                                                                                     |
|                                                | Functional Alteration                                                               | Cells from affected individual               | 1                                                                                 | 0 - 2                                                             | 2      |        |        |             |                                                                                                                     |
|                                                |                                                                                     | Engineered cells                             | 0.5                                                                               | 0 - 1                                                             |        |        |        |             |                                                                                                                     |
| Models & Rescue                                | Animal model                                                                        | 2                                            | 0 - 4                                                                             | 4                                                                 |        |        |        |             |                                                                                                                     |
|                                                | Cell culture model system                                                           | 1                                            | 0 - 2                                                                             |                                                                   |        |        |        |             |                                                                                                                     |
|                                                | Rescue in animal model                                                              | 2                                            | 0 - 4                                                                             |                                                                   |        |        |        |             |                                                                                                                     |
|                                                | Rescue in engineered equivalent                                                     | 1                                            | 0 - 2                                                                             |                                                                   |        |        |        |             |                                                                                                                     |
| Total Experimental Evidence Points (Maximum 6) |                                                                                     |                                              |                                                                                   |                                                                   |        |        | 1      |             |                                                                                                                     |

**Figure S50: Summary of evidence supporting a relationship between SCN4B and autosomal dominant Long QT Syndrome.**

| Assertion criteria                      | Genetic Evidence (0-12 points)                                                                 | Experimental Evidence (0-6 points)                                         | Total Points (0-18)                    | Replication Over Time (Y/N)                        |
|-----------------------------------------|------------------------------------------------------------------------------------------------|----------------------------------------------------------------------------|----------------------------------------|----------------------------------------------------|
| <b>Description</b>                      | Case-level, family segregation, or case-control data that support the gene-disease association | Gene-level experimental evidence that support the gene-disease association | Sum of Genetic & Experimental Evidence | > 2 pubs w/ convincing evidence over time (>3 yrs) |
| <b>Assigned Points</b>                  | <b>2</b>                                                                                       | <b>1</b>                                                                   | <b>3</b>                               | <b>NO</b>                                          |
| <b>CALCULATED CLASSIFICATION</b>        |                                                                                                | <b>LIMITED</b>                                                             | <b>1-6</b>                             |                                                    |
|                                         |                                                                                                | <b>MODERATE</b>                                                            | <b>7-11</b>                            |                                                    |
|                                         |                                                                                                | <b>STRONG</b>                                                              | <b>12-18</b>                           |                                                    |
|                                         |                                                                                                | <b>DEFINITIVE</b>                                                          | <b>12-18 AND replication over time</b> |                                                    |
| Valid contradictory evidence (Y/N)*     | NO                                                                                             |                                                                            |                                        |                                                    |
| <b>CALCULATED CLASSIFICATION (DATE)</b> |                                                                                                | <b>LIMITED</b><br>06/14/2016                                               |                                        |                                                    |
| <b>EXPERT CURATION (DATE)</b>           |                                                                                                | <b>LIMITED</b><br>12/15/16                                                 |                                        |                                                    |

**Figure S51: Summary matrix and classification for *SCN4B* and autosomal dominant Long QT Syndrome.**

### SKI and autosomal dominant Shprintzen-Goldberg syndrome

| Evidence Type                                         |                                                                                     | Case Information Type                                                                                  |                                                                                   | Guidelines                                                        |       |        | Scores |                                                    | PMIDs/Notes                                                                 |                                                                                                  |
|-------------------------------------------------------|-------------------------------------------------------------------------------------|--------------------------------------------------------------------------------------------------------|-----------------------------------------------------------------------------------|-------------------------------------------------------------------|-------|--------|--------|----------------------------------------------------|-----------------------------------------------------------------------------|--------------------------------------------------------------------------------------------------|
|                                                       |                                                                                     |                                                                                                        |                                                                                   | Default                                                           | Range | Max    | Points | Tally                                              |                                                                             |                                                                                                  |
| Genetic Evidence                                      | Case-Level Data                                                                     | Variant Evidence                                                                                       | Autosomal Dominant or X-linked Disorder                                           | Variant is de novo                                                | 2     | 0-3    | 12     | 12.0                                               | 12                                                                          | Carmignac V et al. 2012 Nov 2 (23103230); Doyle AJ et al. 2012 Nov (23023332) <sup>107,108</sup> |
|                                                       |                                                                                     |                                                                                                        |                                                                                   | Proband with predicted or proven null variant                     | 1.5   | 0-2    | 10     |                                                    |                                                                             |                                                                                                  |
|                                                       |                                                                                     |                                                                                                        |                                                                                   | Proband with other variant type with some evidence of gene impact | 0.5   | 0-1.5  | 7      | 5.0                                                | 5                                                                           | Doyle AJ et al. 2012 Nov (23023332); Carmignac V et al. 2012 Nov 2 (23103230) <sup>107,108</sup> |
|                                                       |                                                                                     | Autosomal Recessive Disease                                                                            | Two variants in trans and at least one de novo or a predicted/proven null variant | 2                                                                 | 0-3   | 12     |        |                                                    |                                                                             |                                                                                                  |
|                                                       | Two variants (not predicted/proven null) with some evidence of gene impact in trans |                                                                                                        | 1                                                                                 | 0-1.5                                                             |       |        |        |                                                    |                                                                             |                                                                                                  |
| Segregation Evidence                                  | Evidence of segregation in one or more families                                     | LOD Score Examples                                                                                     | 3                                                                                 | 5                                                                 | 0-7   | 7      | 2.0    | 2                                                  | Carmignac V et al. 2012 Nov 2 (23103230) <sup>107</sup>                     |                                                                                                  |
|                                                       |                                                                                     |                                                                                                        | 2                                                                                 | 4                                                                 |       |        |        |                                                    |                                                                             |                                                                                                  |
|                                                       |                                                                                     |                                                                                                        | 1.5                                                                               | 3                                                                 |       |        |        |                                                    |                                                                             |                                                                                                  |
|                                                       |                                                                                     |                                                                                                        | 1                                                                                 | 1.5                                                               |       |        |        |                                                    |                                                                             |                                                                                                  |
|                                                       |                                                                                     |                                                                                                        |                                                                                   |                                                                   |       |        |        |                                                    |                                                                             |                                                                                                  |
| Case-Control Data                                     | Case-Control Study Type                                                             | Case-Control Quality Criteria                                                                          |                                                                                   | Guidelines                                                        |       | Scores |        | PMIDs/Notes                                        |                                                                             |                                                                                                  |
|                                                       |                                                                                     |                                                                                                        |                                                                                   | Points/Study                                                      | Max   | Points | Tally  |                                                    |                                                                             |                                                                                                  |
|                                                       | Single Variant Analysis                                                             | 1. Variant Detection Methodology<br>2. Power<br>3. Bias and confounding<br>4. Statistical Significance |                                                                                   | 0-6                                                               | 12    |        |        |                                                    |                                                                             |                                                                                                  |
|                                                       |                                                                                     |                                                                                                        |                                                                                   | 0-6                                                               | 12    |        |        |                                                    |                                                                             |                                                                                                  |
| <b>Total Genetic Evidence Points (Maximum 12)</b>     |                                                                                     |                                                                                                        |                                                                                   |                                                                   |       |        |        | <b>16.5</b>                                        | <b>Additional genetic evidence available beyond 12 point maximum score.</b> |                                                                                                  |
| Experimental Evidence                                 | Evidence Category                                                                   | Evidence Type                                                                                          | Guidelines                                                                        |                                                                   |       | Scores |        | PMIDs/Notes                                        |                                                                             |                                                                                                  |
|                                                       |                                                                                     |                                                                                                        | Default                                                                           | Range                                                             | Max   | Points | Tally  |                                                    |                                                                             |                                                                                                  |
|                                                       | Function                                                                            | Biochemical Function                                                                                   | 0.5                                                                               | 0 - 2                                                             | 2     | 1.5    | 1.5    | Doyle AJ et al. 2012 Nov (23023332) <sup>108</sup> |                                                                             |                                                                                                  |
|                                                       |                                                                                     | Protein Interaction                                                                                    | 0.5                                                                               | 0 - 2                                                             |       |        |        |                                                    |                                                                             |                                                                                                  |
|                                                       |                                                                                     | Expression                                                                                             | 0.5                                                                               | 0 - 2                                                             |       |        |        |                                                    |                                                                             |                                                                                                  |
|                                                       | Functional Alteration                                                               | Cells from affected individual                                                                         | 1                                                                                 | 0 - 2                                                             | 2     | 1.0    | 1      | Doyle AJ et al. 2012 Nov (23023332) <sup>108</sup> |                                                                             |                                                                                                  |
|                                                       |                                                                                     | Engineered cells                                                                                       | 0.5                                                                               | 0 - 1                                                             |       |        |        |                                                    |                                                                             |                                                                                                  |
|                                                       | Models & Rescue                                                                     | Animal model                                                                                           | 2                                                                                 | 0 - 4                                                             | 4     | 2.0    | 2      | Doyle AJ et al. 2012 Nov (23023332) <sup>108</sup> |                                                                             |                                                                                                  |
|                                                       |                                                                                     | Cell culture model system                                                                              | 1                                                                                 | 0 - 2                                                             |       |        |        |                                                    |                                                                             |                                                                                                  |
|                                                       |                                                                                     | Rescue in animal model                                                                                 | 2                                                                                 | 0 - 4                                                             |       |        |        |                                                    |                                                                             |                                                                                                  |
| Rescue in engineered equivalent                       |                                                                                     | 1                                                                                                      | 0 - 2                                                                             |                                                                   |       |        |        |                                                    |                                                                             |                                                                                                  |
| <b>Total Experimental Evidence Points (Maximum 6)</b> |                                                                                     |                                                                                                        |                                                                                   |                                                                   |       |        |        | <b>4.5</b>                                         | <b>Additional experimental data may be available.</b>                       |                                                                                                  |

**Figure S52: Summary of evidence supporting a relationship between SKI and autosomal dominant Shprintzen-Goldberg syndrome.**

| Assertion criteria                      | Genetic Evidence (0-12 points)                                                                 | Experimental Evidence (0-6 points)                                         | Total Points (0-18)                    | Replication Over Time (Y/N)                        |
|-----------------------------------------|------------------------------------------------------------------------------------------------|----------------------------------------------------------------------------|----------------------------------------|----------------------------------------------------|
| <b>Description</b>                      | Case-level, family segregation, or case-control data that support the gene-disease association | Gene-level experimental evidence that support the gene-disease association | Sum of Genetic & Experimental Evidence | > 2 pubs w/ convincing evidence over time (>3 yrs) |
| <b>Assigned Points</b>                  | <b>12</b>                                                                                      | <b>4.5</b>                                                                 | <b>16.5</b>                            | <b>YES</b>                                         |
| <b>CALCULATED CLASSIFICATION</b>        |                                                                                                | <b>LIMITED</b>                                                             | <b>1-6</b>                             |                                                    |
|                                         |                                                                                                | <b>MODERATE</b>                                                            | <b>7-11</b>                            |                                                    |
|                                         |                                                                                                | <b>STRONG</b>                                                              | <b>12-18</b>                           |                                                    |
|                                         |                                                                                                | <b>DEFINITIVE</b>                                                          | <b>12-18 AND replication over time</b> |                                                    |
| Valid contradictory evidence (Y/N)*     | NO                                                                                             |                                                                            |                                        |                                                    |
| <b>CALCULATED CLASSIFICATION (DATE)</b> |                                                                                                | <b>DEFINITIVE</b><br>06/02/2016                                            |                                        |                                                    |
| <b>EXPERT CURATION (DATE)</b>           |                                                                                                | <b>DEFINITIVE</b><br>12/01/2016                                            |                                        |                                                    |

**Figure S53: Summary matrix and classification for *SKI* and autosomal dominant Shprintzen-Goldberg syndrome.**

**SMAD3 and autosomal dominant aneurysm-osteoarthritis syndrome**

| Evidence Type                                  | Case Information Type                                                               | Guidelines                                                                                                                                                                                                                                                                                                                                                                                                                                                                                                                                                                                                                                                                                                                                                                                                                                                                                                                                                                                                                                                                                                                                                                                                                                                                                                                                                                                                                                                                                                                                                                                                                                                                                                                                                                                                                                                                                                                                                                                                                                                                                                                                                                                                                                                                                                                                                                                                                                                                                                                                                                                                                                                                                                                                                                                                                                                                                                                                                                                                                                                                                                                                                                                                                                                                                                                                                                                                                                                                                                                                                                                                                                                                                                                                                                                                                                                                                                                                                                                                                                                                                                                                                                                                                                                                                                                                                                                                                                             |                                         |                                                                   | Scores |       | PMIDs/Notes                                                                                   |                                                                                                                 |                                                                                                         |                                                                                                                                                   |                      |                                         |                    |                                                                                                                                                   |     |    |                                                                                                           |                     |     |                                               |            |     |       |                       |                                |                                                                                                                                                   |                                                                   |     |       |   |     |                  |                                                                                                                                                   |                             |                                                                                   |              |     |       |   |     |   |                                                                                               |                           |       |       |                        |   |                      |                                                 |                    |       |                                                |     |   |     |   |                                                                                                         |   |   |     |   |   |     |  |  |                   |                         |                               |            |  |        |  |             |              |     |        |       |                         |                                              |     |    |  |  |                            |                                                        |     |    |  |  |                                            |  |  |  |  |  |  |    |                                                                                                                 |                   |               |            |  |  |        |  |             |         |       |     |        |       |                                                                                                                                                                                                                                                                                                                                                                                                                                                                                                                                                                                                                                                                                                                                                                                                                                                                                                                                                                                                                                                                                                                                                                                                                                                                                                                                                                                         |  |  |  |  |  |  |                       |          |                      |     |       |   |     |   |                                                                                                           |                     |     |       |            |     |       |                       |                                |   |       |   |  |  |  |                  |     |       |                 |              |   |       |   |     |   |                                                                                               |                           |   |       |                        |   |       |                                 |   |       |                                                |  |  |  |  |  |  |
|------------------------------------------------|-------------------------------------------------------------------------------------|--------------------------------------------------------------------------------------------------------------------------------------------------------------------------------------------------------------------------------------------------------------------------------------------------------------------------------------------------------------------------------------------------------------------------------------------------------------------------------------------------------------------------------------------------------------------------------------------------------------------------------------------------------------------------------------------------------------------------------------------------------------------------------------------------------------------------------------------------------------------------------------------------------------------------------------------------------------------------------------------------------------------------------------------------------------------------------------------------------------------------------------------------------------------------------------------------------------------------------------------------------------------------------------------------------------------------------------------------------------------------------------------------------------------------------------------------------------------------------------------------------------------------------------------------------------------------------------------------------------------------------------------------------------------------------------------------------------------------------------------------------------------------------------------------------------------------------------------------------------------------------------------------------------------------------------------------------------------------------------------------------------------------------------------------------------------------------------------------------------------------------------------------------------------------------------------------------------------------------------------------------------------------------------------------------------------------------------------------------------------------------------------------------------------------------------------------------------------------------------------------------------------------------------------------------------------------------------------------------------------------------------------------------------------------------------------------------------------------------------------------------------------------------------------------------------------------------------------------------------------------------------------------------------------------------------------------------------------------------------------------------------------------------------------------------------------------------------------------------------------------------------------------------------------------------------------------------------------------------------------------------------------------------------------------------------------------------------------------------------------------------------------------------------------------------------------------------------------------------------------------------------------------------------------------------------------------------------------------------------------------------------------------------------------------------------------------------------------------------------------------------------------------------------------------------------------------------------------------------------------------------------------------------------------------------------------------------------------------------------------------------------------------------------------------------------------------------------------------------------------------------------------------------------------------------------------------------------------------------------------------------------------------------------------------------------------------------------------------------------------------------------------------------------------------------------------------------|-----------------------------------------|-------------------------------------------------------------------|--------|-------|-----------------------------------------------------------------------------------------------|-----------------------------------------------------------------------------------------------------------------|---------------------------------------------------------------------------------------------------------|---------------------------------------------------------------------------------------------------------------------------------------------------|----------------------|-----------------------------------------|--------------------|---------------------------------------------------------------------------------------------------------------------------------------------------|-----|----|-----------------------------------------------------------------------------------------------------------|---------------------|-----|-----------------------------------------------|------------|-----|-------|-----------------------|--------------------------------|---------------------------------------------------------------------------------------------------------------------------------------------------|-------------------------------------------------------------------|-----|-------|---|-----|------------------|---------------------------------------------------------------------------------------------------------------------------------------------------|-----------------------------|-----------------------------------------------------------------------------------|--------------|-----|-------|---|-----|---|-----------------------------------------------------------------------------------------------|---------------------------|-------|-------|------------------------|---|----------------------|-------------------------------------------------|--------------------|-------|------------------------------------------------|-----|---|-----|---|---------------------------------------------------------------------------------------------------------|---|---|-----|---|---|-----|--|--|-------------------|-------------------------|-------------------------------|------------|--|--------|--|-------------|--------------|-----|--------|-------|-------------------------|----------------------------------------------|-----|----|--|--|----------------------------|--------------------------------------------------------|-----|----|--|--|--------------------------------------------|--|--|--|--|--|--|----|-----------------------------------------------------------------------------------------------------------------|-------------------|---------------|------------|--|--|--------|--|-------------|---------|-------|-----|--------|-------|-----------------------------------------------------------------------------------------------------------------------------------------------------------------------------------------------------------------------------------------------------------------------------------------------------------------------------------------------------------------------------------------------------------------------------------------------------------------------------------------------------------------------------------------------------------------------------------------------------------------------------------------------------------------------------------------------------------------------------------------------------------------------------------------------------------------------------------------------------------------------------------------------------------------------------------------------------------------------------------------------------------------------------------------------------------------------------------------------------------------------------------------------------------------------------------------------------------------------------------------------------------------------------------------------------------------------------------------------------------------------------------------|--|--|--|--|--|--|-----------------------|----------|----------------------|-----|-------|---|-----|---|-----------------------------------------------------------------------------------------------------------|---------------------|-----|-------|------------|-----|-------|-----------------------|--------------------------------|---|-------|---|--|--|--|------------------|-----|-------|-----------------|--------------|---|-------|---|-----|---|-----------------------------------------------------------------------------------------------|---------------------------|---|-------|------------------------|---|-------|---------------------------------|---|-------|------------------------------------------------|--|--|--|--|--|--|
|                                                |                                                                                     | Default                                                                                                                                                                                                                                                                                                                                                                                                                                                                                                                                                                                                                                                                                                                                                                                                                                                                                                                                                                                                                                                                                                                                                                                                                                                                                                                                                                                                                                                                                                                                                                                                                                                                                                                                                                                                                                                                                                                                                                                                                                                                                                                                                                                                                                                                                                                                                                                                                                                                                                                                                                                                                                                                                                                                                                                                                                                                                                                                                                                                                                                                                                                                                                                                                                                                                                                                                                                                                                                                                                                                                                                                                                                                                                                                                                                                                                                                                                                                                                                                                                                                                                                                                                                                                                                                                                                                                                                                                                                | Range                                   | Max                                                               | Points | Tally |                                                                                               |                                                                                                                 |                                                                                                         |                                                                                                                                                   |                      |                                         |                    |                                                                                                                                                   |     |    |                                                                                                           |                     |     |                                               |            |     |       |                       |                                |                                                                                                                                                   |                                                                   |     |       |   |     |                  |                                                                                                                                                   |                             |                                                                                   |              |     |       |   |     |   |                                                                                               |                           |       |       |                        |   |                      |                                                 |                    |       |                                                |     |   |     |   |                                                                                                         |   |   |     |   |   |     |  |  |                   |                         |                               |            |  |        |  |             |              |     |        |       |                         |                                              |     |    |  |  |                            |                                                        |     |    |  |  |                                            |  |  |  |  |  |  |    |                                                                                                                 |                   |               |            |  |  |        |  |             |         |       |     |        |       |                                                                                                                                                                                                                                                                                                                                                                                                                                                                                                                                                                                                                                                                                                                                                                                                                                                                                                                                                                                                                                                                                                                                                                                                                                                                                                                                                                                         |  |  |  |  |  |  |                       |          |                      |     |       |   |     |   |                                                                                                           |                     |     |       |            |     |       |                       |                                |   |       |   |  |  |  |                  |     |       |                 |              |   |       |   |     |   |                                                                                               |                           |   |       |                        |   |       |                                 |   |       |                                                |  |  |  |  |  |  |
|                                                |                                                                                     | <table border="1"> <tr> <td rowspan="3">Genetic Evidence</td> <td rowspan="3">Case-Level Data</td> <td rowspan="3">Variant Evidence</td> <td rowspan="3">Autosomal Dominant or X-linked Disorder</td> <td>Variant is de novo</td> <td>2</td> <td>0-3</td> <td>12</td> <td></td> <td></td> <td></td> </tr> <tr> <td>Proband with predicted or proven null variant</td> <td>1.5</td> <td>0-2</td> <td>10</td> <td>5.0</td> <td>5</td> <td>van de Laar IM et al. 2011 Feb (21217753); Regalado ES et al. 2011 Sep 2 (21778426); van de Laar IM et al. 2012 Jan (22167769)<sup>109-111</sup></td> </tr> <tr> <td>Proband with other variant type with some evidence of gene impact</td> <td>0.5</td> <td>0-1.5</td> <td>7</td> <td>4.0</td> <td>4</td> <td>van de Laar IM et al. 2011 Feb (21217753); Regalado ES et al. 2011 Sep 2 (21778426); van de Laar IM et al. 2012 Jan (22167769)<sup>109-111</sup></td> </tr> <tr> <td rowspan="2">Autosomal Recessive Disease</td> <td>Two variants in trans and at least one de novo or a predicted/proven null variant</td> <td>2</td> <td>0-3</td> <td rowspan="2">12</td> <td></td> <td></td> <td></td> </tr> <tr> <td>Two variants (not predicted/proven null) with some evidence of gene impact in trans</td> <td>1</td> <td>0-1.5</td> <td></td> <td></td> <td></td> </tr> <tr> <td rowspan="5">Segregation Evidence</td> <td rowspan="5">Evidence of segregation in one or more families</td> <td rowspan="5">LOD Score Examples</td> <td>3</td> <td>5</td> <td rowspan="5">0-7</td> <td rowspan="5">7</td> <td rowspan="5">7.0</td> <td rowspan="5">7</td> <td rowspan="5">van de Laar IM et al. 2011 Feb (21217753); Regalado ES et al. 2011 Sep 2 (21778426)<sup>109; 110</sup></td> </tr> <tr> <td>2</td> <td>4</td> </tr> <tr> <td>1.5</td> <td>3</td> </tr> <tr> <td>1</td> <td>1.5</td> </tr> <tr> <td></td> <td></td> </tr> <tr> <td rowspan="3">Case-Control Data</td> <td rowspan="3">Case-Control Study Type</td> <td rowspan="3">Case-Control Quality Criteria</td> <td colspan="2">Guidelines</td> <td colspan="2">Scores</td> <td rowspan="3">PMIDs/Notes</td> </tr> <tr> <td>Points/Study</td> <td>Max</td> <td>Points</td> <td>Tally</td> </tr> <tr> <td>Single Variant Analysis</td> <td>1. Variant Detection Methodology<br/>2. Power</td> <td>0-6</td> <td>12</td> <td></td> <td></td> </tr> <tr> <td>Aggregate Variant Analysis</td> <td>3. Bias and confounding<br/>4. Statistical Significance</td> <td>0-6</td> <td>12</td> <td></td> <td></td> </tr> <tr> <td colspan="7">Total Genetic Evidence Points (Maximum 12)</td> <td>17</td> <td>Additional genetic evidence is available, but not curated due to achievement of maximum genetic evidence score.</td> </tr> <tr> <th rowspan="3">Evidence Category</th> <th rowspan="3">Evidence Type</th> <th colspan="3">Guidelines</th> <th colspan="2">Scores</th> <th rowspan="3">PMIDs/Notes</th> </tr> <tr> <th>Default</th> <th>Range</th> <th>Max</th> <th>Points</th> <th>Tally</th> </tr> <tr> <td colspan="7"> <table border="1"> <tr> <td rowspan="3">Experimental Evidence</td> <td rowspan="3">Function</td> <td>Biochemical Function</td> <td>0.5</td> <td>0 - 2</td> <td rowspan="3">2</td> <td rowspan="3">1.0</td> <td rowspan="3">1</td> <td rowspan="3">Verrecchia F et al. 2007 Jun 14 (17589920); van de Laar IM et al. 2011 Feb (21217753)<sup>109; 112</sup></td> </tr> <tr> <td>Protein Interaction</td> <td>0.5</td> <td>0 - 2</td> </tr> <tr> <td>Expression</td> <td>0.5</td> <td>0 - 2</td> </tr> <tr> <td rowspan="2">Functional Alteration</td> <td>Cells from affected individual</td> <td>1</td> <td>0 - 2</td> <td rowspan="2">2</td> <td></td> <td></td> <td></td> </tr> <tr> <td>Engineered cells</td> <td>0.5</td> <td>0 - 1</td> </tr> <tr> <td rowspan="4">Models &amp; Rescue</td> <td>Animal model</td> <td>2</td> <td>0 - 4</td> <td rowspan="4">4</td> <td rowspan="4">4.0</td> <td rowspan="4">4</td> <td rowspan="4">Yang X et al. 2001 Apr 2 (11285272); Tan CK et al. 2013 Jun 19 (23782924)<sup>113; 114</sup></td> </tr> <tr> <td>Cell culture model system</td> <td>1</td> <td>0 - 2</td> </tr> <tr> <td>Rescue in animal model</td> <td>2</td> <td>0 - 4</td> </tr> <tr> <td>Rescue in engineered equivalent</td> <td>1</td> <td>0 - 2</td> </tr> <tr> <td colspan="7">Total Experimental Evidence Points (Maximum 6)</td> <td>5</td> <td></td> </tr> </table> </td> </tr> </table> |                                         |                                                                   |        |       |                                                                                               |                                                                                                                 | Genetic Evidence                                                                                        | Case-Level Data                                                                                                                                   | Variant Evidence     | Autosomal Dominant or X-linked Disorder | Variant is de novo | 2                                                                                                                                                 | 0-3 | 12 |                                                                                                           |                     |     | Proband with predicted or proven null variant | 1.5        | 0-2 | 10    | 5.0                   | 5                              | van de Laar IM et al. 2011 Feb (21217753); Regalado ES et al. 2011 Sep 2 (21778426); van de Laar IM et al. 2012 Jan (22167769) <sup>109-111</sup> | Proband with other variant type with some evidence of gene impact | 0.5 | 0-1.5 | 7 | 4.0 | 4                | van de Laar IM et al. 2011 Feb (21217753); Regalado ES et al. 2011 Sep 2 (21778426); van de Laar IM et al. 2012 Jan (22167769) <sup>109-111</sup> | Autosomal Recessive Disease | Two variants in trans and at least one de novo or a predicted/proven null variant | 2            | 0-3 | 12    |   |     |   | Two variants (not predicted/proven null) with some evidence of gene impact in trans           | 1                         | 0-1.5 |       |                        |   | Segregation Evidence | Evidence of segregation in one or more families | LOD Score Examples | 3     | 5                                              | 0-7 | 7 | 7.0 | 7 | van de Laar IM et al. 2011 Feb (21217753); Regalado ES et al. 2011 Sep 2 (21778426) <sup>109; 110</sup> | 2 | 4 | 1.5 | 3 | 1 | 1.5 |  |  | Case-Control Data | Case-Control Study Type | Case-Control Quality Criteria | Guidelines |  | Scores |  | PMIDs/Notes | Points/Study | Max | Points | Tally | Single Variant Analysis | 1. Variant Detection Methodology<br>2. Power | 0-6 | 12 |  |  | Aggregate Variant Analysis | 3. Bias and confounding<br>4. Statistical Significance | 0-6 | 12 |  |  | Total Genetic Evidence Points (Maximum 12) |  |  |  |  |  |  | 17 | Additional genetic evidence is available, but not curated due to achievement of maximum genetic evidence score. | Evidence Category | Evidence Type | Guidelines |  |  | Scores |  | PMIDs/Notes | Default | Range | Max | Points | Tally | <table border="1"> <tr> <td rowspan="3">Experimental Evidence</td> <td rowspan="3">Function</td> <td>Biochemical Function</td> <td>0.5</td> <td>0 - 2</td> <td rowspan="3">2</td> <td rowspan="3">1.0</td> <td rowspan="3">1</td> <td rowspan="3">Verrecchia F et al. 2007 Jun 14 (17589920); van de Laar IM et al. 2011 Feb (21217753)<sup>109; 112</sup></td> </tr> <tr> <td>Protein Interaction</td> <td>0.5</td> <td>0 - 2</td> </tr> <tr> <td>Expression</td> <td>0.5</td> <td>0 - 2</td> </tr> <tr> <td rowspan="2">Functional Alteration</td> <td>Cells from affected individual</td> <td>1</td> <td>0 - 2</td> <td rowspan="2">2</td> <td></td> <td></td> <td></td> </tr> <tr> <td>Engineered cells</td> <td>0.5</td> <td>0 - 1</td> </tr> <tr> <td rowspan="4">Models &amp; Rescue</td> <td>Animal model</td> <td>2</td> <td>0 - 4</td> <td rowspan="4">4</td> <td rowspan="4">4.0</td> <td rowspan="4">4</td> <td rowspan="4">Yang X et al. 2001 Apr 2 (11285272); Tan CK et al. 2013 Jun 19 (23782924)<sup>113; 114</sup></td> </tr> <tr> <td>Cell culture model system</td> <td>1</td> <td>0 - 2</td> </tr> <tr> <td>Rescue in animal model</td> <td>2</td> <td>0 - 4</td> </tr> <tr> <td>Rescue in engineered equivalent</td> <td>1</td> <td>0 - 2</td> </tr> <tr> <td colspan="7">Total Experimental Evidence Points (Maximum 6)</td> <td>5</td> <td></td> </tr> </table> |  |  |  |  |  |  | Experimental Evidence | Function | Biochemical Function | 0.5 | 0 - 2 | 2 | 1.0 | 1 | Verrecchia F et al. 2007 Jun 14 (17589920); van de Laar IM et al. 2011 Feb (21217753) <sup>109; 112</sup> | Protein Interaction | 0.5 | 0 - 2 | Expression | 0.5 | 0 - 2 | Functional Alteration | Cells from affected individual | 1 | 0 - 2 | 2 |  |  |  | Engineered cells | 0.5 | 0 - 1 | Models & Rescue | Animal model | 2 | 0 - 4 | 4 | 4.0 | 4 | Yang X et al. 2001 Apr 2 (11285272); Tan CK et al. 2013 Jun 19 (23782924) <sup>113; 114</sup> | Cell culture model system | 1 | 0 - 2 | Rescue in animal model | 2 | 0 - 4 | Rescue in engineered equivalent | 1 | 0 - 2 | Total Experimental Evidence Points (Maximum 6) |  |  |  |  |  |  |
| Genetic Evidence                               | Case-Level Data                                                                     | Variant Evidence                                                                                                                                                                                                                                                                                                                                                                                                                                                                                                                                                                                                                                                                                                                                                                                                                                                                                                                                                                                                                                                                                                                                                                                                                                                                                                                                                                                                                                                                                                                                                                                                                                                                                                                                                                                                                                                                                                                                                                                                                                                                                                                                                                                                                                                                                                                                                                                                                                                                                                                                                                                                                                                                                                                                                                                                                                                                                                                                                                                                                                                                                                                                                                                                                                                                                                                                                                                                                                                                                                                                                                                                                                                                                                                                                                                                                                                                                                                                                                                                                                                                                                                                                                                                                                                                                                                                                                                                                                       | Autosomal Dominant or X-linked Disorder | Variant is de novo                                                | 2      | 0-3   | 12                                                                                            |                                                                                                                 |                                                                                                         |                                                                                                                                                   |                      |                                         |                    |                                                                                                                                                   |     |    |                                                                                                           |                     |     |                                               |            |     |       |                       |                                |                                                                                                                                                   |                                                                   |     |       |   |     |                  |                                                                                                                                                   |                             |                                                                                   |              |     |       |   |     |   |                                                                                               |                           |       |       |                        |   |                      |                                                 |                    |       |                                                |     |   |     |   |                                                                                                         |   |   |     |   |   |     |  |  |                   |                         |                               |            |  |        |  |             |              |     |        |       |                         |                                              |     |    |  |  |                            |                                                        |     |    |  |  |                                            |  |  |  |  |  |  |    |                                                                                                                 |                   |               |            |  |  |        |  |             |         |       |     |        |       |                                                                                                                                                                                                                                                                                                                                                                                                                                                                                                                                                                                                                                                                                                                                                                                                                                                                                                                                                                                                                                                                                                                                                                                                                                                                                                                                                                                         |  |  |  |  |  |  |                       |          |                      |     |       |   |     |   |                                                                                                           |                     |     |       |            |     |       |                       |                                |   |       |   |  |  |  |                  |     |       |                 |              |   |       |   |     |   |                                                                                               |                           |   |       |                        |   |       |                                 |   |       |                                                |  |  |  |  |  |  |
|                                                |                                                                                     |                                                                                                                                                                                                                                                                                                                                                                                                                                                                                                                                                                                                                                                                                                                                                                                                                                                                                                                                                                                                                                                                                                                                                                                                                                                                                                                                                                                                                                                                                                                                                                                                                                                                                                                                                                                                                                                                                                                                                                                                                                                                                                                                                                                                                                                                                                                                                                                                                                                                                                                                                                                                                                                                                                                                                                                                                                                                                                                                                                                                                                                                                                                                                                                                                                                                                                                                                                                                                                                                                                                                                                                                                                                                                                                                                                                                                                                                                                                                                                                                                                                                                                                                                                                                                                                                                                                                                                                                                                                        |                                         | Proband with predicted or proven null variant                     | 1.5    | 0-2   | 10                                                                                            | 5.0                                                                                                             |                                                                                                         |                                                                                                                                                   |                      |                                         | 5                  | van de Laar IM et al. 2011 Feb (21217753); Regalado ES et al. 2011 Sep 2 (21778426); van de Laar IM et al. 2012 Jan (22167769) <sup>109-111</sup> |     |    |                                                                                                           |                     |     |                                               |            |     |       |                       |                                |                                                                                                                                                   |                                                                   |     |       |   |     |                  |                                                                                                                                                   |                             |                                                                                   |              |     |       |   |     |   |                                                                                               |                           |       |       |                        |   |                      |                                                 |                    |       |                                                |     |   |     |   |                                                                                                         |   |   |     |   |   |     |  |  |                   |                         |                               |            |  |        |  |             |              |     |        |       |                         |                                              |     |    |  |  |                            |                                                        |     |    |  |  |                                            |  |  |  |  |  |  |    |                                                                                                                 |                   |               |            |  |  |        |  |             |         |       |     |        |       |                                                                                                                                                                                                                                                                                                                                                                                                                                                                                                                                                                                                                                                                                                                                                                                                                                                                                                                                                                                                                                                                                                                                                                                                                                                                                                                                                                                         |  |  |  |  |  |  |                       |          |                      |     |       |   |     |   |                                                                                                           |                     |     |       |            |     |       |                       |                                |   |       |   |  |  |  |                  |     |       |                 |              |   |       |   |     |   |                                                                                               |                           |   |       |                        |   |       |                                 |   |       |                                                |  |  |  |  |  |  |
|                                                |                                                                                     |                                                                                                                                                                                                                                                                                                                                                                                                                                                                                                                                                                                                                                                                                                                                                                                                                                                                                                                                                                                                                                                                                                                                                                                                                                                                                                                                                                                                                                                                                                                                                                                                                                                                                                                                                                                                                                                                                                                                                                                                                                                                                                                                                                                                                                                                                                                                                                                                                                                                                                                                                                                                                                                                                                                                                                                                                                                                                                                                                                                                                                                                                                                                                                                                                                                                                                                                                                                                                                                                                                                                                                                                                                                                                                                                                                                                                                                                                                                                                                                                                                                                                                                                                                                                                                                                                                                                                                                                                                                        |                                         | Proband with other variant type with some evidence of gene impact | 0.5    | 0-1.5 | 7                                                                                             | 4.0                                                                                                             | 4                                                                                                       | van de Laar IM et al. 2011 Feb (21217753); Regalado ES et al. 2011 Sep 2 (21778426); van de Laar IM et al. 2012 Jan (22167769) <sup>109-111</sup> |                      |                                         |                    |                                                                                                                                                   |     |    |                                                                                                           |                     |     |                                               |            |     |       |                       |                                |                                                                                                                                                   |                                                                   |     |       |   |     |                  |                                                                                                                                                   |                             |                                                                                   |              |     |       |   |     |   |                                                                                               |                           |       |       |                        |   |                      |                                                 |                    |       |                                                |     |   |     |   |                                                                                                         |   |   |     |   |   |     |  |  |                   |                         |                               |            |  |        |  |             |              |     |        |       |                         |                                              |     |    |  |  |                            |                                                        |     |    |  |  |                                            |  |  |  |  |  |  |    |                                                                                                                 |                   |               |            |  |  |        |  |             |         |       |     |        |       |                                                                                                                                                                                                                                                                                                                                                                                                                                                                                                                                                                                                                                                                                                                                                                                                                                                                                                                                                                                                                                                                                                                                                                                                                                                                                                                                                                                         |  |  |  |  |  |  |                       |          |                      |     |       |   |     |   |                                                                                                           |                     |     |       |            |     |       |                       |                                |   |       |   |  |  |  |                  |     |       |                 |              |   |       |   |     |   |                                                                                               |                           |   |       |                        |   |       |                                 |   |       |                                                |  |  |  |  |  |  |
| Autosomal Recessive Disease                    | Two variants in trans and at least one de novo or a predicted/proven null variant   | 2                                                                                                                                                                                                                                                                                                                                                                                                                                                                                                                                                                                                                                                                                                                                                                                                                                                                                                                                                                                                                                                                                                                                                                                                                                                                                                                                                                                                                                                                                                                                                                                                                                                                                                                                                                                                                                                                                                                                                                                                                                                                                                                                                                                                                                                                                                                                                                                                                                                                                                                                                                                                                                                                                                                                                                                                                                                                                                                                                                                                                                                                                                                                                                                                                                                                                                                                                                                                                                                                                                                                                                                                                                                                                                                                                                                                                                                                                                                                                                                                                                                                                                                                                                                                                                                                                                                                                                                                                                                      | 0-3                                     | 12                                                                |        |       |                                                                                               |                                                                                                                 |                                                                                                         |                                                                                                                                                   |                      |                                         |                    |                                                                                                                                                   |     |    |                                                                                                           |                     |     |                                               |            |     |       |                       |                                |                                                                                                                                                   |                                                                   |     |       |   |     |                  |                                                                                                                                                   |                             |                                                                                   |              |     |       |   |     |   |                                                                                               |                           |       |       |                        |   |                      |                                                 |                    |       |                                                |     |   |     |   |                                                                                                         |   |   |     |   |   |     |  |  |                   |                         |                               |            |  |        |  |             |              |     |        |       |                         |                                              |     |    |  |  |                            |                                                        |     |    |  |  |                                            |  |  |  |  |  |  |    |                                                                                                                 |                   |               |            |  |  |        |  |             |         |       |     |        |       |                                                                                                                                                                                                                                                                                                                                                                                                                                                                                                                                                                                                                                                                                                                                                                                                                                                                                                                                                                                                                                                                                                                                                                                                                                                                                                                                                                                         |  |  |  |  |  |  |                       |          |                      |     |       |   |     |   |                                                                                                           |                     |     |       |            |     |       |                       |                                |   |       |   |  |  |  |                  |     |       |                 |              |   |       |   |     |   |                                                                                               |                           |   |       |                        |   |       |                                 |   |       |                                                |  |  |  |  |  |  |
|                                                | Two variants (not predicted/proven null) with some evidence of gene impact in trans | 1                                                                                                                                                                                                                                                                                                                                                                                                                                                                                                                                                                                                                                                                                                                                                                                                                                                                                                                                                                                                                                                                                                                                                                                                                                                                                                                                                                                                                                                                                                                                                                                                                                                                                                                                                                                                                                                                                                                                                                                                                                                                                                                                                                                                                                                                                                                                                                                                                                                                                                                                                                                                                                                                                                                                                                                                                                                                                                                                                                                                                                                                                                                                                                                                                                                                                                                                                                                                                                                                                                                                                                                                                                                                                                                                                                                                                                                                                                                                                                                                                                                                                                                                                                                                                                                                                                                                                                                                                                                      | 0-1.5                                   |                                                                   |        |       |                                                                                               |                                                                                                                 |                                                                                                         |                                                                                                                                                   |                      |                                         |                    |                                                                                                                                                   |     |    |                                                                                                           |                     |     |                                               |            |     |       |                       |                                |                                                                                                                                                   |                                                                   |     |       |   |     |                  |                                                                                                                                                   |                             |                                                                                   |              |     |       |   |     |   |                                                                                               |                           |       |       |                        |   |                      |                                                 |                    |       |                                                |     |   |     |   |                                                                                                         |   |   |     |   |   |     |  |  |                   |                         |                               |            |  |        |  |             |              |     |        |       |                         |                                              |     |    |  |  |                            |                                                        |     |    |  |  |                                            |  |  |  |  |  |  |    |                                                                                                                 |                   |               |            |  |  |        |  |             |         |       |     |        |       |                                                                                                                                                                                                                                                                                                                                                                                                                                                                                                                                                                                                                                                                                                                                                                                                                                                                                                                                                                                                                                                                                                                                                                                                                                                                                                                                                                                         |  |  |  |  |  |  |                       |          |                      |     |       |   |     |   |                                                                                                           |                     |     |       |            |     |       |                       |                                |   |       |   |  |  |  |                  |     |       |                 |              |   |       |   |     |   |                                                                                               |                           |   |       |                        |   |       |                                 |   |       |                                                |  |  |  |  |  |  |
| Segregation Evidence                           | Evidence of segregation in one or more families                                     | LOD Score Examples                                                                                                                                                                                                                                                                                                                                                                                                                                                                                                                                                                                                                                                                                                                                                                                                                                                                                                                                                                                                                                                                                                                                                                                                                                                                                                                                                                                                                                                                                                                                                                                                                                                                                                                                                                                                                                                                                                                                                                                                                                                                                                                                                                                                                                                                                                                                                                                                                                                                                                                                                                                                                                                                                                                                                                                                                                                                                                                                                                                                                                                                                                                                                                                                                                                                                                                                                                                                                                                                                                                                                                                                                                                                                                                                                                                                                                                                                                                                                                                                                                                                                                                                                                                                                                                                                                                                                                                                                                     | 3                                       | 5                                                                 | 0-7    | 7     | 7.0                                                                                           | 7                                                                                                               | van de Laar IM et al. 2011 Feb (21217753); Regalado ES et al. 2011 Sep 2 (21778426) <sup>109; 110</sup> |                                                                                                                                                   |                      |                                         |                    |                                                                                                                                                   |     |    |                                                                                                           |                     |     |                                               |            |     |       |                       |                                |                                                                                                                                                   |                                                                   |     |       |   |     |                  |                                                                                                                                                   |                             |                                                                                   |              |     |       |   |     |   |                                                                                               |                           |       |       |                        |   |                      |                                                 |                    |       |                                                |     |   |     |   |                                                                                                         |   |   |     |   |   |     |  |  |                   |                         |                               |            |  |        |  |             |              |     |        |       |                         |                                              |     |    |  |  |                            |                                                        |     |    |  |  |                                            |  |  |  |  |  |  |    |                                                                                                                 |                   |               |            |  |  |        |  |             |         |       |     |        |       |                                                                                                                                                                                                                                                                                                                                                                                                                                                                                                                                                                                                                                                                                                                                                                                                                                                                                                                                                                                                                                                                                                                                                                                                                                                                                                                                                                                         |  |  |  |  |  |  |                       |          |                      |     |       |   |     |   |                                                                                                           |                     |     |       |            |     |       |                       |                                |   |       |   |  |  |  |                  |     |       |                 |              |   |       |   |     |   |                                                                                               |                           |   |       |                        |   |       |                                 |   |       |                                                |  |  |  |  |  |  |
|                                                |                                                                                     |                                                                                                                                                                                                                                                                                                                                                                                                                                                                                                                                                                                                                                                                                                                                                                                                                                                                                                                                                                                                                                                                                                                                                                                                                                                                                                                                                                                                                                                                                                                                                                                                                                                                                                                                                                                                                                                                                                                                                                                                                                                                                                                                                                                                                                                                                                                                                                                                                                                                                                                                                                                                                                                                                                                                                                                                                                                                                                                                                                                                                                                                                                                                                                                                                                                                                                                                                                                                                                                                                                                                                                                                                                                                                                                                                                                                                                                                                                                                                                                                                                                                                                                                                                                                                                                                                                                                                                                                                                                        | 2                                       | 4                                                                 |        |       |                                                                                               |                                                                                                                 |                                                                                                         |                                                                                                                                                   |                      |                                         |                    |                                                                                                                                                   |     |    |                                                                                                           |                     |     |                                               |            |     |       |                       |                                |                                                                                                                                                   |                                                                   |     |       |   |     |                  |                                                                                                                                                   |                             |                                                                                   |              |     |       |   |     |   |                                                                                               |                           |       |       |                        |   |                      |                                                 |                    |       |                                                |     |   |     |   |                                                                                                         |   |   |     |   |   |     |  |  |                   |                         |                               |            |  |        |  |             |              |     |        |       |                         |                                              |     |    |  |  |                            |                                                        |     |    |  |  |                                            |  |  |  |  |  |  |    |                                                                                                                 |                   |               |            |  |  |        |  |             |         |       |     |        |       |                                                                                                                                                                                                                                                                                                                                                                                                                                                                                                                                                                                                                                                                                                                                                                                                                                                                                                                                                                                                                                                                                                                                                                                                                                                                                                                                                                                         |  |  |  |  |  |  |                       |          |                      |     |       |   |     |   |                                                                                                           |                     |     |       |            |     |       |                       |                                |   |       |   |  |  |  |                  |     |       |                 |              |   |       |   |     |   |                                                                                               |                           |   |       |                        |   |       |                                 |   |       |                                                |  |  |  |  |  |  |
|                                                |                                                                                     |                                                                                                                                                                                                                                                                                                                                                                                                                                                                                                                                                                                                                                                                                                                                                                                                                                                                                                                                                                                                                                                                                                                                                                                                                                                                                                                                                                                                                                                                                                                                                                                                                                                                                                                                                                                                                                                                                                                                                                                                                                                                                                                                                                                                                                                                                                                                                                                                                                                                                                                                                                                                                                                                                                                                                                                                                                                                                                                                                                                                                                                                                                                                                                                                                                                                                                                                                                                                                                                                                                                                                                                                                                                                                                                                                                                                                                                                                                                                                                                                                                                                                                                                                                                                                                                                                                                                                                                                                                                        | 1.5                                     | 3                                                                 |        |       |                                                                                               |                                                                                                                 |                                                                                                         |                                                                                                                                                   |                      |                                         |                    |                                                                                                                                                   |     |    |                                                                                                           |                     |     |                                               |            |     |       |                       |                                |                                                                                                                                                   |                                                                   |     |       |   |     |                  |                                                                                                                                                   |                             |                                                                                   |              |     |       |   |     |   |                                                                                               |                           |       |       |                        |   |                      |                                                 |                    |       |                                                |     |   |     |   |                                                                                                         |   |   |     |   |   |     |  |  |                   |                         |                               |            |  |        |  |             |              |     |        |       |                         |                                              |     |    |  |  |                            |                                                        |     |    |  |  |                                            |  |  |  |  |  |  |    |                                                                                                                 |                   |               |            |  |  |        |  |             |         |       |     |        |       |                                                                                                                                                                                                                                                                                                                                                                                                                                                                                                                                                                                                                                                                                                                                                                                                                                                                                                                                                                                                                                                                                                                                                                                                                                                                                                                                                                                         |  |  |  |  |  |  |                       |          |                      |     |       |   |     |   |                                                                                                           |                     |     |       |            |     |       |                       |                                |   |       |   |  |  |  |                  |     |       |                 |              |   |       |   |     |   |                                                                                               |                           |   |       |                        |   |       |                                 |   |       |                                                |  |  |  |  |  |  |
|                                                |                                                                                     |                                                                                                                                                                                                                                                                                                                                                                                                                                                                                                                                                                                                                                                                                                                                                                                                                                                                                                                                                                                                                                                                                                                                                                                                                                                                                                                                                                                                                                                                                                                                                                                                                                                                                                                                                                                                                                                                                                                                                                                                                                                                                                                                                                                                                                                                                                                                                                                                                                                                                                                                                                                                                                                                                                                                                                                                                                                                                                                                                                                                                                                                                                                                                                                                                                                                                                                                                                                                                                                                                                                                                                                                                                                                                                                                                                                                                                                                                                                                                                                                                                                                                                                                                                                                                                                                                                                                                                                                                                                        | 1                                       | 1.5                                                               |        |       |                                                                                               |                                                                                                                 |                                                                                                         |                                                                                                                                                   |                      |                                         |                    |                                                                                                                                                   |     |    |                                                                                                           |                     |     |                                               |            |     |       |                       |                                |                                                                                                                                                   |                                                                   |     |       |   |     |                  |                                                                                                                                                   |                             |                                                                                   |              |     |       |   |     |   |                                                                                               |                           |       |       |                        |   |                      |                                                 |                    |       |                                                |     |   |     |   |                                                                                                         |   |   |     |   |   |     |  |  |                   |                         |                               |            |  |        |  |             |              |     |        |       |                         |                                              |     |    |  |  |                            |                                                        |     |    |  |  |                                            |  |  |  |  |  |  |    |                                                                                                                 |                   |               |            |  |  |        |  |             |         |       |     |        |       |                                                                                                                                                                                                                                                                                                                                                                                                                                                                                                                                                                                                                                                                                                                                                                                                                                                                                                                                                                                                                                                                                                                                                                                                                                                                                                                                                                                         |  |  |  |  |  |  |                       |          |                      |     |       |   |     |   |                                                                                                           |                     |     |       |            |     |       |                       |                                |   |       |   |  |  |  |                  |     |       |                 |              |   |       |   |     |   |                                                                                               |                           |   |       |                        |   |       |                                 |   |       |                                                |  |  |  |  |  |  |
|                                                |                                                                                     |                                                                                                                                                                                                                                                                                                                                                                                                                                                                                                                                                                                                                                                                                                                                                                                                                                                                                                                                                                                                                                                                                                                                                                                                                                                                                                                                                                                                                                                                                                                                                                                                                                                                                                                                                                                                                                                                                                                                                                                                                                                                                                                                                                                                                                                                                                                                                                                                                                                                                                                                                                                                                                                                                                                                                                                                                                                                                                                                                                                                                                                                                                                                                                                                                                                                                                                                                                                                                                                                                                                                                                                                                                                                                                                                                                                                                                                                                                                                                                                                                                                                                                                                                                                                                                                                                                                                                                                                                                                        |                                         |                                                                   |        |       |                                                                                               |                                                                                                                 |                                                                                                         |                                                                                                                                                   |                      |                                         |                    |                                                                                                                                                   |     |    |                                                                                                           |                     |     |                                               |            |     |       |                       |                                |                                                                                                                                                   |                                                                   |     |       |   |     |                  |                                                                                                                                                   |                             |                                                                                   |              |     |       |   |     |   |                                                                                               |                           |       |       |                        |   |                      |                                                 |                    |       |                                                |     |   |     |   |                                                                                                         |   |   |     |   |   |     |  |  |                   |                         |                               |            |  |        |  |             |              |     |        |       |                         |                                              |     |    |  |  |                            |                                                        |     |    |  |  |                                            |  |  |  |  |  |  |    |                                                                                                                 |                   |               |            |  |  |        |  |             |         |       |     |        |       |                                                                                                                                                                                                                                                                                                                                                                                                                                                                                                                                                                                                                                                                                                                                                                                                                                                                                                                                                                                                                                                                                                                                                                                                                                                                                                                                                                                         |  |  |  |  |  |  |                       |          |                      |     |       |   |     |   |                                                                                                           |                     |     |       |            |     |       |                       |                                |   |       |   |  |  |  |                  |     |       |                 |              |   |       |   |     |   |                                                                                               |                           |   |       |                        |   |       |                                 |   |       |                                                |  |  |  |  |  |  |
| Case-Control Data                              | Case-Control Study Type                                                             | Case-Control Quality Criteria                                                                                                                                                                                                                                                                                                                                                                                                                                                                                                                                                                                                                                                                                                                                                                                                                                                                                                                                                                                                                                                                                                                                                                                                                                                                                                                                                                                                                                                                                                                                                                                                                                                                                                                                                                                                                                                                                                                                                                                                                                                                                                                                                                                                                                                                                                                                                                                                                                                                                                                                                                                                                                                                                                                                                                                                                                                                                                                                                                                                                                                                                                                                                                                                                                                                                                                                                                                                                                                                                                                                                                                                                                                                                                                                                                                                                                                                                                                                                                                                                                                                                                                                                                                                                                                                                                                                                                                                                          | Guidelines                              |                                                                   | Scores |       | PMIDs/Notes                                                                                   |                                                                                                                 |                                                                                                         |                                                                                                                                                   |                      |                                         |                    |                                                                                                                                                   |     |    |                                                                                                           |                     |     |                                               |            |     |       |                       |                                |                                                                                                                                                   |                                                                   |     |       |   |     |                  |                                                                                                                                                   |                             |                                                                                   |              |     |       |   |     |   |                                                                                               |                           |       |       |                        |   |                      |                                                 |                    |       |                                                |     |   |     |   |                                                                                                         |   |   |     |   |   |     |  |  |                   |                         |                               |            |  |        |  |             |              |     |        |       |                         |                                              |     |    |  |  |                            |                                                        |     |    |  |  |                                            |  |  |  |  |  |  |    |                                                                                                                 |                   |               |            |  |  |        |  |             |         |       |     |        |       |                                                                                                                                                                                                                                                                                                                                                                                                                                                                                                                                                                                                                                                                                                                                                                                                                                                                                                                                                                                                                                                                                                                                                                                                                                                                                                                                                                                         |  |  |  |  |  |  |                       |          |                      |     |       |   |     |   |                                                                                                           |                     |     |       |            |     |       |                       |                                |   |       |   |  |  |  |                  |     |       |                 |              |   |       |   |     |   |                                                                                               |                           |   |       |                        |   |       |                                 |   |       |                                                |  |  |  |  |  |  |
|                                                |                                                                                     |                                                                                                                                                                                                                                                                                                                                                                                                                                                                                                                                                                                                                                                                                                                                                                                                                                                                                                                                                                                                                                                                                                                                                                                                                                                                                                                                                                                                                                                                                                                                                                                                                                                                                                                                                                                                                                                                                                                                                                                                                                                                                                                                                                                                                                                                                                                                                                                                                                                                                                                                                                                                                                                                                                                                                                                                                                                                                                                                                                                                                                                                                                                                                                                                                                                                                                                                                                                                                                                                                                                                                                                                                                                                                                                                                                                                                                                                                                                                                                                                                                                                                                                                                                                                                                                                                                                                                                                                                                                        | Points/Study                            | Max                                                               | Points | Tally |                                                                                               |                                                                                                                 |                                                                                                         |                                                                                                                                                   |                      |                                         |                    |                                                                                                                                                   |     |    |                                                                                                           |                     |     |                                               |            |     |       |                       |                                |                                                                                                                                                   |                                                                   |     |       |   |     |                  |                                                                                                                                                   |                             |                                                                                   |              |     |       |   |     |   |                                                                                               |                           |       |       |                        |   |                      |                                                 |                    |       |                                                |     |   |     |   |                                                                                                         |   |   |     |   |   |     |  |  |                   |                         |                               |            |  |        |  |             |              |     |        |       |                         |                                              |     |    |  |  |                            |                                                        |     |    |  |  |                                            |  |  |  |  |  |  |    |                                                                                                                 |                   |               |            |  |  |        |  |             |         |       |     |        |       |                                                                                                                                                                                                                                                                                                                                                                                                                                                                                                                                                                                                                                                                                                                                                                                                                                                                                                                                                                                                                                                                                                                                                                                                                                                                                                                                                                                         |  |  |  |  |  |  |                       |          |                      |     |       |   |     |   |                                                                                                           |                     |     |       |            |     |       |                       |                                |   |       |   |  |  |  |                  |     |       |                 |              |   |       |   |     |   |                                                                                               |                           |   |       |                        |   |       |                                 |   |       |                                                |  |  |  |  |  |  |
|                                                |                                                                                     |                                                                                                                                                                                                                                                                                                                                                                                                                                                                                                                                                                                                                                                                                                                                                                                                                                                                                                                                                                                                                                                                                                                                                                                                                                                                                                                                                                                                                                                                                                                                                                                                                                                                                                                                                                                                                                                                                                                                                                                                                                                                                                                                                                                                                                                                                                                                                                                                                                                                                                                                                                                                                                                                                                                                                                                                                                                                                                                                                                                                                                                                                                                                                                                                                                                                                                                                                                                                                                                                                                                                                                                                                                                                                                                                                                                                                                                                                                                                                                                                                                                                                                                                                                                                                                                                                                                                                                                                                                                        | Single Variant Analysis                 | 1. Variant Detection Methodology<br>2. Power                      | 0-6    | 12    |                                                                                               |                                                                                                                 |                                                                                                         |                                                                                                                                                   |                      |                                         |                    |                                                                                                                                                   |     |    |                                                                                                           |                     |     |                                               |            |     |       |                       |                                |                                                                                                                                                   |                                                                   |     |       |   |     |                  |                                                                                                                                                   |                             |                                                                                   |              |     |       |   |     |   |                                                                                               |                           |       |       |                        |   |                      |                                                 |                    |       |                                                |     |   |     |   |                                                                                                         |   |   |     |   |   |     |  |  |                   |                         |                               |            |  |        |  |             |              |     |        |       |                         |                                              |     |    |  |  |                            |                                                        |     |    |  |  |                                            |  |  |  |  |  |  |    |                                                                                                                 |                   |               |            |  |  |        |  |             |         |       |     |        |       |                                                                                                                                                                                                                                                                                                                                                                                                                                                                                                                                                                                                                                                                                                                                                                                                                                                                                                                                                                                                                                                                                                                                                                                                                                                                                                                                                                                         |  |  |  |  |  |  |                       |          |                      |     |       |   |     |   |                                                                                                           |                     |     |       |            |     |       |                       |                                |   |       |   |  |  |  |                  |     |       |                 |              |   |       |   |     |   |                                                                                               |                           |   |       |                        |   |       |                                 |   |       |                                                |  |  |  |  |  |  |
| Aggregate Variant Analysis                     | 3. Bias and confounding<br>4. Statistical Significance                              | 0-6                                                                                                                                                                                                                                                                                                                                                                                                                                                                                                                                                                                                                                                                                                                                                                                                                                                                                                                                                                                                                                                                                                                                                                                                                                                                                                                                                                                                                                                                                                                                                                                                                                                                                                                                                                                                                                                                                                                                                                                                                                                                                                                                                                                                                                                                                                                                                                                                                                                                                                                                                                                                                                                                                                                                                                                                                                                                                                                                                                                                                                                                                                                                                                                                                                                                                                                                                                                                                                                                                                                                                                                                                                                                                                                                                                                                                                                                                                                                                                                                                                                                                                                                                                                                                                                                                                                                                                                                                                                    | 12                                      |                                                                   |        |       |                                                                                               |                                                                                                                 |                                                                                                         |                                                                                                                                                   |                      |                                         |                    |                                                                                                                                                   |     |    |                                                                                                           |                     |     |                                               |            |     |       |                       |                                |                                                                                                                                                   |                                                                   |     |       |   |     |                  |                                                                                                                                                   |                             |                                                                                   |              |     |       |   |     |   |                                                                                               |                           |       |       |                        |   |                      |                                                 |                    |       |                                                |     |   |     |   |                                                                                                         |   |   |     |   |   |     |  |  |                   |                         |                               |            |  |        |  |             |              |     |        |       |                         |                                              |     |    |  |  |                            |                                                        |     |    |  |  |                                            |  |  |  |  |  |  |    |                                                                                                                 |                   |               |            |  |  |        |  |             |         |       |     |        |       |                                                                                                                                                                                                                                                                                                                                                                                                                                                                                                                                                                                                                                                                                                                                                                                                                                                                                                                                                                                                                                                                                                                                                                                                                                                                                                                                                                                         |  |  |  |  |  |  |                       |          |                      |     |       |   |     |   |                                                                                                           |                     |     |       |            |     |       |                       |                                |   |       |   |  |  |  |                  |     |       |                 |              |   |       |   |     |   |                                                                                               |                           |   |       |                        |   |       |                                 |   |       |                                                |  |  |  |  |  |  |
| Total Genetic Evidence Points (Maximum 12)     |                                                                                     |                                                                                                                                                                                                                                                                                                                                                                                                                                                                                                                                                                                                                                                                                                                                                                                                                                                                                                                                                                                                                                                                                                                                                                                                                                                                                                                                                                                                                                                                                                                                                                                                                                                                                                                                                                                                                                                                                                                                                                                                                                                                                                                                                                                                                                                                                                                                                                                                                                                                                                                                                                                                                                                                                                                                                                                                                                                                                                                                                                                                                                                                                                                                                                                                                                                                                                                                                                                                                                                                                                                                                                                                                                                                                                                                                                                                                                                                                                                                                                                                                                                                                                                                                                                                                                                                                                                                                                                                                                                        |                                         |                                                                   |        |       | 17                                                                                            | Additional genetic evidence is available, but not curated due to achievement of maximum genetic evidence score. |                                                                                                         |                                                                                                                                                   |                      |                                         |                    |                                                                                                                                                   |     |    |                                                                                                           |                     |     |                                               |            |     |       |                       |                                |                                                                                                                                                   |                                                                   |     |       |   |     |                  |                                                                                                                                                   |                             |                                                                                   |              |     |       |   |     |   |                                                                                               |                           |       |       |                        |   |                      |                                                 |                    |       |                                                |     |   |     |   |                                                                                                         |   |   |     |   |   |     |  |  |                   |                         |                               |            |  |        |  |             |              |     |        |       |                         |                                              |     |    |  |  |                            |                                                        |     |    |  |  |                                            |  |  |  |  |  |  |    |                                                                                                                 |                   |               |            |  |  |        |  |             |         |       |     |        |       |                                                                                                                                                                                                                                                                                                                                                                                                                                                                                                                                                                                                                                                                                                                                                                                                                                                                                                                                                                                                                                                                                                                                                                                                                                                                                                                                                                                         |  |  |  |  |  |  |                       |          |                      |     |       |   |     |   |                                                                                                           |                     |     |       |            |     |       |                       |                                |   |       |   |  |  |  |                  |     |       |                 |              |   |       |   |     |   |                                                                                               |                           |   |       |                        |   |       |                                 |   |       |                                                |  |  |  |  |  |  |
| Evidence Category                              | Evidence Type                                                                       | Guidelines                                                                                                                                                                                                                                                                                                                                                                                                                                                                                                                                                                                                                                                                                                                                                                                                                                                                                                                                                                                                                                                                                                                                                                                                                                                                                                                                                                                                                                                                                                                                                                                                                                                                                                                                                                                                                                                                                                                                                                                                                                                                                                                                                                                                                                                                                                                                                                                                                                                                                                                                                                                                                                                                                                                                                                                                                                                                                                                                                                                                                                                                                                                                                                                                                                                                                                                                                                                                                                                                                                                                                                                                                                                                                                                                                                                                                                                                                                                                                                                                                                                                                                                                                                                                                                                                                                                                                                                                                                             |                                         |                                                                   | Scores |       | PMIDs/Notes                                                                                   |                                                                                                                 |                                                                                                         |                                                                                                                                                   |                      |                                         |                    |                                                                                                                                                   |     |    |                                                                                                           |                     |     |                                               |            |     |       |                       |                                |                                                                                                                                                   |                                                                   |     |       |   |     |                  |                                                                                                                                                   |                             |                                                                                   |              |     |       |   |     |   |                                                                                               |                           |       |       |                        |   |                      |                                                 |                    |       |                                                |     |   |     |   |                                                                                                         |   |   |     |   |   |     |  |  |                   |                         |                               |            |  |        |  |             |              |     |        |       |                         |                                              |     |    |  |  |                            |                                                        |     |    |  |  |                                            |  |  |  |  |  |  |    |                                                                                                                 |                   |               |            |  |  |        |  |             |         |       |     |        |       |                                                                                                                                                                                                                                                                                                                                                                                                                                                                                                                                                                                                                                                                                                                                                                                                                                                                                                                                                                                                                                                                                                                                                                                                                                                                                                                                                                                         |  |  |  |  |  |  |                       |          |                      |     |       |   |     |   |                                                                                                           |                     |     |       |            |     |       |                       |                                |   |       |   |  |  |  |                  |     |       |                 |              |   |       |   |     |   |                                                                                               |                           |   |       |                        |   |       |                                 |   |       |                                                |  |  |  |  |  |  |
|                                                |                                                                                     | Default                                                                                                                                                                                                                                                                                                                                                                                                                                                                                                                                                                                                                                                                                                                                                                                                                                                                                                                                                                                                                                                                                                                                                                                                                                                                                                                                                                                                                                                                                                                                                                                                                                                                                                                                                                                                                                                                                                                                                                                                                                                                                                                                                                                                                                                                                                                                                                                                                                                                                                                                                                                                                                                                                                                                                                                                                                                                                                                                                                                                                                                                                                                                                                                                                                                                                                                                                                                                                                                                                                                                                                                                                                                                                                                                                                                                                                                                                                                                                                                                                                                                                                                                                                                                                                                                                                                                                                                                                                                | Range                                   | Max                                                               | Points | Tally |                                                                                               |                                                                                                                 |                                                                                                         |                                                                                                                                                   |                      |                                         |                    |                                                                                                                                                   |     |    |                                                                                                           |                     |     |                                               |            |     |       |                       |                                |                                                                                                                                                   |                                                                   |     |       |   |     |                  |                                                                                                                                                   |                             |                                                                                   |              |     |       |   |     |   |                                                                                               |                           |       |       |                        |   |                      |                                                 |                    |       |                                                |     |   |     |   |                                                                                                         |   |   |     |   |   |     |  |  |                   |                         |                               |            |  |        |  |             |              |     |        |       |                         |                                              |     |    |  |  |                            |                                                        |     |    |  |  |                                            |  |  |  |  |  |  |    |                                                                                                                 |                   |               |            |  |  |        |  |             |         |       |     |        |       |                                                                                                                                                                                                                                                                                                                                                                                                                                                                                                                                                                                                                                                                                                                                                                                                                                                                                                                                                                                                                                                                                                                                                                                                                                                                                                                                                                                         |  |  |  |  |  |  |                       |          |                      |     |       |   |     |   |                                                                                                           |                     |     |       |            |     |       |                       |                                |   |       |   |  |  |  |                  |     |       |                 |              |   |       |   |     |   |                                                                                               |                           |   |       |                        |   |       |                                 |   |       |                                                |  |  |  |  |  |  |
|                                                |                                                                                     | <table border="1"> <tr> <td rowspan="3">Experimental Evidence</td> <td rowspan="3">Function</td> <td>Biochemical Function</td> <td>0.5</td> <td>0 - 2</td> <td rowspan="3">2</td> <td rowspan="3">1.0</td> <td rowspan="3">1</td> <td rowspan="3">Verrecchia F et al. 2007 Jun 14 (17589920); van de Laar IM et al. 2011 Feb (21217753)<sup>109; 112</sup></td> </tr> <tr> <td>Protein Interaction</td> <td>0.5</td> <td>0 - 2</td> </tr> <tr> <td>Expression</td> <td>0.5</td> <td>0 - 2</td> </tr> <tr> <td rowspan="2">Functional Alteration</td> <td>Cells from affected individual</td> <td>1</td> <td>0 - 2</td> <td rowspan="2">2</td> <td></td> <td></td> <td></td> </tr> <tr> <td>Engineered cells</td> <td>0.5</td> <td>0 - 1</td> </tr> <tr> <td rowspan="4">Models &amp; Rescue</td> <td>Animal model</td> <td>2</td> <td>0 - 4</td> <td rowspan="4">4</td> <td rowspan="4">4.0</td> <td rowspan="4">4</td> <td rowspan="4">Yang X et al. 2001 Apr 2 (11285272); Tan CK et al. 2013 Jun 19 (23782924)<sup>113; 114</sup></td> </tr> <tr> <td>Cell culture model system</td> <td>1</td> <td>0 - 2</td> </tr> <tr> <td>Rescue in animal model</td> <td>2</td> <td>0 - 4</td> </tr> <tr> <td>Rescue in engineered equivalent</td> <td>1</td> <td>0 - 2</td> </tr> <tr> <td colspan="7">Total Experimental Evidence Points (Maximum 6)</td> <td>5</td> <td></td> </tr> </table>                                                                                                                                                                                                                                                                                                                                                                                                                                                                                                                                                                                                                                                                                                                                                                                                                                                                                                                                                                                                                                                                                                                                                                                                                                                                                                                                                                                                                                                                                                                                                                                                                                                                                                                                                                                                                                                                                                                                                                                                                                                                                                                                                                                                                                                                                                                                                                                                                                                                                                                                                                                                                                                                                                                                                                                                                                                                                                                                                                                                                                                                |                                         |                                                                   |        |       |                                                                                               |                                                                                                                 | Experimental Evidence                                                                                   | Function                                                                                                                                          | Biochemical Function | 0.5                                     | 0 - 2              | 2                                                                                                                                                 | 1.0 | 1  | Verrecchia F et al. 2007 Jun 14 (17589920); van de Laar IM et al. 2011 Feb (21217753) <sup>109; 112</sup> | Protein Interaction | 0.5 | 0 - 2                                         | Expression | 0.5 | 0 - 2 | Functional Alteration | Cells from affected individual | 1                                                                                                                                                 | 0 - 2                                                             | 2   |       |   |     | Engineered cells | 0.5                                                                                                                                               | 0 - 1                       | Models & Rescue                                                                   | Animal model | 2   | 0 - 4 | 4 | 4.0 | 4 | Yang X et al. 2001 Apr 2 (11285272); Tan CK et al. 2013 Jun 19 (23782924) <sup>113; 114</sup> | Cell culture model system | 1     | 0 - 2 | Rescue in animal model | 2 | 0 - 4                | Rescue in engineered equivalent                 | 1                  | 0 - 2 | Total Experimental Evidence Points (Maximum 6) |     |   |     |   |                                                                                                         |   | 5 |     |   |   |     |  |  |                   |                         |                               |            |  |        |  |             |              |     |        |       |                         |                                              |     |    |  |  |                            |                                                        |     |    |  |  |                                            |  |  |  |  |  |  |    |                                                                                                                 |                   |               |            |  |  |        |  |             |         |       |     |        |       |                                                                                                                                                                                                                                                                                                                                                                                                                                                                                                                                                                                                                                                                                                                                                                                                                                                                                                                                                                                                                                                                                                                                                                                                                                                                                                                                                                                         |  |  |  |  |  |  |                       |          |                      |     |       |   |     |   |                                                                                                           |                     |     |       |            |     |       |                       |                                |   |       |   |  |  |  |                  |     |       |                 |              |   |       |   |     |   |                                                                                               |                           |   |       |                        |   |       |                                 |   |       |                                                |  |  |  |  |  |  |
| Experimental Evidence                          | Function                                                                            | Biochemical Function                                                                                                                                                                                                                                                                                                                                                                                                                                                                                                                                                                                                                                                                                                                                                                                                                                                                                                                                                                                                                                                                                                                                                                                                                                                                                                                                                                                                                                                                                                                                                                                                                                                                                                                                                                                                                                                                                                                                                                                                                                                                                                                                                                                                                                                                                                                                                                                                                                                                                                                                                                                                                                                                                                                                                                                                                                                                                                                                                                                                                                                                                                                                                                                                                                                                                                                                                                                                                                                                                                                                                                                                                                                                                                                                                                                                                                                                                                                                                                                                                                                                                                                                                                                                                                                                                                                                                                                                                                   | 0.5                                     | 0 - 2                                                             | 2      | 1.0   | 1                                                                                             | Verrecchia F et al. 2007 Jun 14 (17589920); van de Laar IM et al. 2011 Feb (21217753) <sup>109; 112</sup>       |                                                                                                         |                                                                                                                                                   |                      |                                         |                    |                                                                                                                                                   |     |    |                                                                                                           |                     |     |                                               |            |     |       |                       |                                |                                                                                                                                                   |                                                                   |     |       |   |     |                  |                                                                                                                                                   |                             |                                                                                   |              |     |       |   |     |   |                                                                                               |                           |       |       |                        |   |                      |                                                 |                    |       |                                                |     |   |     |   |                                                                                                         |   |   |     |   |   |     |  |  |                   |                         |                               |            |  |        |  |             |              |     |        |       |                         |                                              |     |    |  |  |                            |                                                        |     |    |  |  |                                            |  |  |  |  |  |  |    |                                                                                                                 |                   |               |            |  |  |        |  |             |         |       |     |        |       |                                                                                                                                                                                                                                                                                                                                                                                                                                                                                                                                                                                                                                                                                                                                                                                                                                                                                                                                                                                                                                                                                                                                                                                                                                                                                                                                                                                         |  |  |  |  |  |  |                       |          |                      |     |       |   |     |   |                                                                                                           |                     |     |       |            |     |       |                       |                                |   |       |   |  |  |  |                  |     |       |                 |              |   |       |   |     |   |                                                                                               |                           |   |       |                        |   |       |                                 |   |       |                                                |  |  |  |  |  |  |
|                                                |                                                                                     | Protein Interaction                                                                                                                                                                                                                                                                                                                                                                                                                                                                                                                                                                                                                                                                                                                                                                                                                                                                                                                                                                                                                                                                                                                                                                                                                                                                                                                                                                                                                                                                                                                                                                                                                                                                                                                                                                                                                                                                                                                                                                                                                                                                                                                                                                                                                                                                                                                                                                                                                                                                                                                                                                                                                                                                                                                                                                                                                                                                                                                                                                                                                                                                                                                                                                                                                                                                                                                                                                                                                                                                                                                                                                                                                                                                                                                                                                                                                                                                                                                                                                                                                                                                                                                                                                                                                                                                                                                                                                                                                                    | 0.5                                     | 0 - 2                                                             |        |       |                                                                                               |                                                                                                                 |                                                                                                         |                                                                                                                                                   |                      |                                         |                    |                                                                                                                                                   |     |    |                                                                                                           |                     |     |                                               |            |     |       |                       |                                |                                                                                                                                                   |                                                                   |     |       |   |     |                  |                                                                                                                                                   |                             |                                                                                   |              |     |       |   |     |   |                                                                                               |                           |       |       |                        |   |                      |                                                 |                    |       |                                                |     |   |     |   |                                                                                                         |   |   |     |   |   |     |  |  |                   |                         |                               |            |  |        |  |             |              |     |        |       |                         |                                              |     |    |  |  |                            |                                                        |     |    |  |  |                                            |  |  |  |  |  |  |    |                                                                                                                 |                   |               |            |  |  |        |  |             |         |       |     |        |       |                                                                                                                                                                                                                                                                                                                                                                                                                                                                                                                                                                                                                                                                                                                                                                                                                                                                                                                                                                                                                                                                                                                                                                                                                                                                                                                                                                                         |  |  |  |  |  |  |                       |          |                      |     |       |   |     |   |                                                                                                           |                     |     |       |            |     |       |                       |                                |   |       |   |  |  |  |                  |     |       |                 |              |   |       |   |     |   |                                                                                               |                           |   |       |                        |   |       |                                 |   |       |                                                |  |  |  |  |  |  |
|                                                |                                                                                     | Expression                                                                                                                                                                                                                                                                                                                                                                                                                                                                                                                                                                                                                                                                                                                                                                                                                                                                                                                                                                                                                                                                                                                                                                                                                                                                                                                                                                                                                                                                                                                                                                                                                                                                                                                                                                                                                                                                                                                                                                                                                                                                                                                                                                                                                                                                                                                                                                                                                                                                                                                                                                                                                                                                                                                                                                                                                                                                                                                                                                                                                                                                                                                                                                                                                                                                                                                                                                                                                                                                                                                                                                                                                                                                                                                                                                                                                                                                                                                                                                                                                                                                                                                                                                                                                                                                                                                                                                                                                                             | 0.5                                     | 0 - 2                                                             |        |       |                                                                                               |                                                                                                                 |                                                                                                         |                                                                                                                                                   |                      |                                         |                    |                                                                                                                                                   |     |    |                                                                                                           |                     |     |                                               |            |     |       |                       |                                |                                                                                                                                                   |                                                                   |     |       |   |     |                  |                                                                                                                                                   |                             |                                                                                   |              |     |       |   |     |   |                                                                                               |                           |       |       |                        |   |                      |                                                 |                    |       |                                                |     |   |     |   |                                                                                                         |   |   |     |   |   |     |  |  |                   |                         |                               |            |  |        |  |             |              |     |        |       |                         |                                              |     |    |  |  |                            |                                                        |     |    |  |  |                                            |  |  |  |  |  |  |    |                                                                                                                 |                   |               |            |  |  |        |  |             |         |       |     |        |       |                                                                                                                                                                                                                                                                                                                                                                                                                                                                                                                                                                                                                                                                                                                                                                                                                                                                                                                                                                                                                                                                                                                                                                                                                                                                                                                                                                                         |  |  |  |  |  |  |                       |          |                      |     |       |   |     |   |                                                                                                           |                     |     |       |            |     |       |                       |                                |   |       |   |  |  |  |                  |     |       |                 |              |   |       |   |     |   |                                                                                               |                           |   |       |                        |   |       |                                 |   |       |                                                |  |  |  |  |  |  |
| Functional Alteration                          | Cells from affected individual                                                      | 1                                                                                                                                                                                                                                                                                                                                                                                                                                                                                                                                                                                                                                                                                                                                                                                                                                                                                                                                                                                                                                                                                                                                                                                                                                                                                                                                                                                                                                                                                                                                                                                                                                                                                                                                                                                                                                                                                                                                                                                                                                                                                                                                                                                                                                                                                                                                                                                                                                                                                                                                                                                                                                                                                                                                                                                                                                                                                                                                                                                                                                                                                                                                                                                                                                                                                                                                                                                                                                                                                                                                                                                                                                                                                                                                                                                                                                                                                                                                                                                                                                                                                                                                                                                                                                                                                                                                                                                                                                                      | 0 - 2                                   | 2                                                                 |        |       |                                                                                               |                                                                                                                 |                                                                                                         |                                                                                                                                                   |                      |                                         |                    |                                                                                                                                                   |     |    |                                                                                                           |                     |     |                                               |            |     |       |                       |                                |                                                                                                                                                   |                                                                   |     |       |   |     |                  |                                                                                                                                                   |                             |                                                                                   |              |     |       |   |     |   |                                                                                               |                           |       |       |                        |   |                      |                                                 |                    |       |                                                |     |   |     |   |                                                                                                         |   |   |     |   |   |     |  |  |                   |                         |                               |            |  |        |  |             |              |     |        |       |                         |                                              |     |    |  |  |                            |                                                        |     |    |  |  |                                            |  |  |  |  |  |  |    |                                                                                                                 |                   |               |            |  |  |        |  |             |         |       |     |        |       |                                                                                                                                                                                                                                                                                                                                                                                                                                                                                                                                                                                                                                                                                                                                                                                                                                                                                                                                                                                                                                                                                                                                                                                                                                                                                                                                                                                         |  |  |  |  |  |  |                       |          |                      |     |       |   |     |   |                                                                                                           |                     |     |       |            |     |       |                       |                                |   |       |   |  |  |  |                  |     |       |                 |              |   |       |   |     |   |                                                                                               |                           |   |       |                        |   |       |                                 |   |       |                                                |  |  |  |  |  |  |
|                                                | Engineered cells                                                                    | 0.5                                                                                                                                                                                                                                                                                                                                                                                                                                                                                                                                                                                                                                                                                                                                                                                                                                                                                                                                                                                                                                                                                                                                                                                                                                                                                                                                                                                                                                                                                                                                                                                                                                                                                                                                                                                                                                                                                                                                                                                                                                                                                                                                                                                                                                                                                                                                                                                                                                                                                                                                                                                                                                                                                                                                                                                                                                                                                                                                                                                                                                                                                                                                                                                                                                                                                                                                                                                                                                                                                                                                                                                                                                                                                                                                                                                                                                                                                                                                                                                                                                                                                                                                                                                                                                                                                                                                                                                                                                                    | 0 - 1                                   |                                                                   |        |       |                                                                                               |                                                                                                                 |                                                                                                         |                                                                                                                                                   |                      |                                         |                    |                                                                                                                                                   |     |    |                                                                                                           |                     |     |                                               |            |     |       |                       |                                |                                                                                                                                                   |                                                                   |     |       |   |     |                  |                                                                                                                                                   |                             |                                                                                   |              |     |       |   |     |   |                                                                                               |                           |       |       |                        |   |                      |                                                 |                    |       |                                                |     |   |     |   |                                                                                                         |   |   |     |   |   |     |  |  |                   |                         |                               |            |  |        |  |             |              |     |        |       |                         |                                              |     |    |  |  |                            |                                                        |     |    |  |  |                                            |  |  |  |  |  |  |    |                                                                                                                 |                   |               |            |  |  |        |  |             |         |       |     |        |       |                                                                                                                                                                                                                                                                                                                                                                                                                                                                                                                                                                                                                                                                                                                                                                                                                                                                                                                                                                                                                                                                                                                                                                                                                                                                                                                                                                                         |  |  |  |  |  |  |                       |          |                      |     |       |   |     |   |                                                                                                           |                     |     |       |            |     |       |                       |                                |   |       |   |  |  |  |                  |     |       |                 |              |   |       |   |     |   |                                                                                               |                           |   |       |                        |   |       |                                 |   |       |                                                |  |  |  |  |  |  |
| Models & Rescue                                | Animal model                                                                        | 2                                                                                                                                                                                                                                                                                                                                                                                                                                                                                                                                                                                                                                                                                                                                                                                                                                                                                                                                                                                                                                                                                                                                                                                                                                                                                                                                                                                                                                                                                                                                                                                                                                                                                                                                                                                                                                                                                                                                                                                                                                                                                                                                                                                                                                                                                                                                                                                                                                                                                                                                                                                                                                                                                                                                                                                                                                                                                                                                                                                                                                                                                                                                                                                                                                                                                                                                                                                                                                                                                                                                                                                                                                                                                                                                                                                                                                                                                                                                                                                                                                                                                                                                                                                                                                                                                                                                                                                                                                                      | 0 - 4                                   | 4                                                                 | 4.0    | 4     | Yang X et al. 2001 Apr 2 (11285272); Tan CK et al. 2013 Jun 19 (23782924) <sup>113; 114</sup> |                                                                                                                 |                                                                                                         |                                                                                                                                                   |                      |                                         |                    |                                                                                                                                                   |     |    |                                                                                                           |                     |     |                                               |            |     |       |                       |                                |                                                                                                                                                   |                                                                   |     |       |   |     |                  |                                                                                                                                                   |                             |                                                                                   |              |     |       |   |     |   |                                                                                               |                           |       |       |                        |   |                      |                                                 |                    |       |                                                |     |   |     |   |                                                                                                         |   |   |     |   |   |     |  |  |                   |                         |                               |            |  |        |  |             |              |     |        |       |                         |                                              |     |    |  |  |                            |                                                        |     |    |  |  |                                            |  |  |  |  |  |  |    |                                                                                                                 |                   |               |            |  |  |        |  |             |         |       |     |        |       |                                                                                                                                                                                                                                                                                                                                                                                                                                                                                                                                                                                                                                                                                                                                                                                                                                                                                                                                                                                                                                                                                                                                                                                                                                                                                                                                                                                         |  |  |  |  |  |  |                       |          |                      |     |       |   |     |   |                                                                                                           |                     |     |       |            |     |       |                       |                                |   |       |   |  |  |  |                  |     |       |                 |              |   |       |   |     |   |                                                                                               |                           |   |       |                        |   |       |                                 |   |       |                                                |  |  |  |  |  |  |
|                                                | Cell culture model system                                                           | 1                                                                                                                                                                                                                                                                                                                                                                                                                                                                                                                                                                                                                                                                                                                                                                                                                                                                                                                                                                                                                                                                                                                                                                                                                                                                                                                                                                                                                                                                                                                                                                                                                                                                                                                                                                                                                                                                                                                                                                                                                                                                                                                                                                                                                                                                                                                                                                                                                                                                                                                                                                                                                                                                                                                                                                                                                                                                                                                                                                                                                                                                                                                                                                                                                                                                                                                                                                                                                                                                                                                                                                                                                                                                                                                                                                                                                                                                                                                                                                                                                                                                                                                                                                                                                                                                                                                                                                                                                                                      | 0 - 2                                   |                                                                   |        |       |                                                                                               |                                                                                                                 |                                                                                                         |                                                                                                                                                   |                      |                                         |                    |                                                                                                                                                   |     |    |                                                                                                           |                     |     |                                               |            |     |       |                       |                                |                                                                                                                                                   |                                                                   |     |       |   |     |                  |                                                                                                                                                   |                             |                                                                                   |              |     |       |   |     |   |                                                                                               |                           |       |       |                        |   |                      |                                                 |                    |       |                                                |     |   |     |   |                                                                                                         |   |   |     |   |   |     |  |  |                   |                         |                               |            |  |        |  |             |              |     |        |       |                         |                                              |     |    |  |  |                            |                                                        |     |    |  |  |                                            |  |  |  |  |  |  |    |                                                                                                                 |                   |               |            |  |  |        |  |             |         |       |     |        |       |                                                                                                                                                                                                                                                                                                                                                                                                                                                                                                                                                                                                                                                                                                                                                                                                                                                                                                                                                                                                                                                                                                                                                                                                                                                                                                                                                                                         |  |  |  |  |  |  |                       |          |                      |     |       |   |     |   |                                                                                                           |                     |     |       |            |     |       |                       |                                |   |       |   |  |  |  |                  |     |       |                 |              |   |       |   |     |   |                                                                                               |                           |   |       |                        |   |       |                                 |   |       |                                                |  |  |  |  |  |  |
|                                                | Rescue in animal model                                                              | 2                                                                                                                                                                                                                                                                                                                                                                                                                                                                                                                                                                                                                                                                                                                                                                                                                                                                                                                                                                                                                                                                                                                                                                                                                                                                                                                                                                                                                                                                                                                                                                                                                                                                                                                                                                                                                                                                                                                                                                                                                                                                                                                                                                                                                                                                                                                                                                                                                                                                                                                                                                                                                                                                                                                                                                                                                                                                                                                                                                                                                                                                                                                                                                                                                                                                                                                                                                                                                                                                                                                                                                                                                                                                                                                                                                                                                                                                                                                                                                                                                                                                                                                                                                                                                                                                                                                                                                                                                                                      | 0 - 4                                   |                                                                   |        |       |                                                                                               |                                                                                                                 |                                                                                                         |                                                                                                                                                   |                      |                                         |                    |                                                                                                                                                   |     |    |                                                                                                           |                     |     |                                               |            |     |       |                       |                                |                                                                                                                                                   |                                                                   |     |       |   |     |                  |                                                                                                                                                   |                             |                                                                                   |              |     |       |   |     |   |                                                                                               |                           |       |       |                        |   |                      |                                                 |                    |       |                                                |     |   |     |   |                                                                                                         |   |   |     |   |   |     |  |  |                   |                         |                               |            |  |        |  |             |              |     |        |       |                         |                                              |     |    |  |  |                            |                                                        |     |    |  |  |                                            |  |  |  |  |  |  |    |                                                                                                                 |                   |               |            |  |  |        |  |             |         |       |     |        |       |                                                                                                                                                                                                                                                                                                                                                                                                                                                                                                                                                                                                                                                                                                                                                                                                                                                                                                                                                                                                                                                                                                                                                                                                                                                                                                                                                                                         |  |  |  |  |  |  |                       |          |                      |     |       |   |     |   |                                                                                                           |                     |     |       |            |     |       |                       |                                |   |       |   |  |  |  |                  |     |       |                 |              |   |       |   |     |   |                                                                                               |                           |   |       |                        |   |       |                                 |   |       |                                                |  |  |  |  |  |  |
|                                                | Rescue in engineered equivalent                                                     | 1                                                                                                                                                                                                                                                                                                                                                                                                                                                                                                                                                                                                                                                                                                                                                                                                                                                                                                                                                                                                                                                                                                                                                                                                                                                                                                                                                                                                                                                                                                                                                                                                                                                                                                                                                                                                                                                                                                                                                                                                                                                                                                                                                                                                                                                                                                                                                                                                                                                                                                                                                                                                                                                                                                                                                                                                                                                                                                                                                                                                                                                                                                                                                                                                                                                                                                                                                                                                                                                                                                                                                                                                                                                                                                                                                                                                                                                                                                                                                                                                                                                                                                                                                                                                                                                                                                                                                                                                                                                      | 0 - 2                                   |                                                                   |        |       |                                                                                               |                                                                                                                 |                                                                                                         |                                                                                                                                                   |                      |                                         |                    |                                                                                                                                                   |     |    |                                                                                                           |                     |     |                                               |            |     |       |                       |                                |                                                                                                                                                   |                                                                   |     |       |   |     |                  |                                                                                                                                                   |                             |                                                                                   |              |     |       |   |     |   |                                                                                               |                           |       |       |                        |   |                      |                                                 |                    |       |                                                |     |   |     |   |                                                                                                         |   |   |     |   |   |     |  |  |                   |                         |                               |            |  |        |  |             |              |     |        |       |                         |                                              |     |    |  |  |                            |                                                        |     |    |  |  |                                            |  |  |  |  |  |  |    |                                                                                                                 |                   |               |            |  |  |        |  |             |         |       |     |        |       |                                                                                                                                                                                                                                                                                                                                                                                                                                                                                                                                                                                                                                                                                                                                                                                                                                                                                                                                                                                                                                                                                                                                                                                                                                                                                                                                                                                         |  |  |  |  |  |  |                       |          |                      |     |       |   |     |   |                                                                                                           |                     |     |       |            |     |       |                       |                                |   |       |   |  |  |  |                  |     |       |                 |              |   |       |   |     |   |                                                                                               |                           |   |       |                        |   |       |                                 |   |       |                                                |  |  |  |  |  |  |
| Total Experimental Evidence Points (Maximum 6) |                                                                                     |                                                                                                                                                                                                                                                                                                                                                                                                                                                                                                                                                                                                                                                                                                                                                                                                                                                                                                                                                                                                                                                                                                                                                                                                                                                                                                                                                                                                                                                                                                                                                                                                                                                                                                                                                                                                                                                                                                                                                                                                                                                                                                                                                                                                                                                                                                                                                                                                                                                                                                                                                                                                                                                                                                                                                                                                                                                                                                                                                                                                                                                                                                                                                                                                                                                                                                                                                                                                                                                                                                                                                                                                                                                                                                                                                                                                                                                                                                                                                                                                                                                                                                                                                                                                                                                                                                                                                                                                                                                        |                                         |                                                                   |        |       | 5                                                                                             |                                                                                                                 |                                                                                                         |                                                                                                                                                   |                      |                                         |                    |                                                                                                                                                   |     |    |                                                                                                           |                     |     |                                               |            |     |       |                       |                                |                                                                                                                                                   |                                                                   |     |       |   |     |                  |                                                                                                                                                   |                             |                                                                                   |              |     |       |   |     |   |                                                                                               |                           |       |       |                        |   |                      |                                                 |                    |       |                                                |     |   |     |   |                                                                                                         |   |   |     |   |   |     |  |  |                   |                         |                               |            |  |        |  |             |              |     |        |       |                         |                                              |     |    |  |  |                            |                                                        |     |    |  |  |                                            |  |  |  |  |  |  |    |                                                                                                                 |                   |               |            |  |  |        |  |             |         |       |     |        |       |                                                                                                                                                                                                                                                                                                                                                                                                                                                                                                                                                                                                                                                                                                                                                                                                                                                                                                                                                                                                                                                                                                                                                                                                                                                                                                                                                                                         |  |  |  |  |  |  |                       |          |                      |     |       |   |     |   |                                                                                                           |                     |     |       |            |     |       |                       |                                |   |       |   |  |  |  |                  |     |       |                 |              |   |       |   |     |   |                                                                                               |                           |   |       |                        |   |       |                                 |   |       |                                                |  |  |  |  |  |  |

**Figure S54: Summary of evidence supporting a relationship between SMAD3 and autosomal dominant aneurysm-osteoarthritis syndrome.**



| Assertion criteria                  | Genetic Evidence (0-12 points)                                                                 | Experimental Evidence (0-6 points)                                         | Total Points (0-18)                    | Replication Over Time (Y/N)                        |
|-------------------------------------|------------------------------------------------------------------------------------------------|----------------------------------------------------------------------------|----------------------------------------|----------------------------------------------------|
| <b>Description</b>                  | Case-level, family segregation, or case-control data that support the gene-disease association | Gene-level experimental evidence that support the gene-disease association | Sum of Genetic & Experimental Evidence | > 2 pubs w/ convincing evidence over time (>3 yrs) |
| <b>Assigned Points</b>              | <b>12</b>                                                                                      | <b>5</b>                                                                   | <b>17</b>                              | <b>YES</b>                                         |
| <b>CALCULATED CLASSIFICATION</b>    |                                                                                                | <b>LIMITED</b>                                                             | <b>1-6</b>                             |                                                    |
|                                     |                                                                                                | <b>MODERATE</b>                                                            | <b>7-11</b>                            |                                                    |
|                                     |                                                                                                | <b>STRONG</b>                                                              | <b>12-18</b>                           |                                                    |
|                                     |                                                                                                | <b>DEFINITIVE</b>                                                          | <b>12-18 AND replication over time</b> |                                                    |
| Valid contradictory evidence (Y/N)* | NO                                                                                             |                                                                            |                                        |                                                    |
|                                     | <b>CALCULATED CLASSIFICATION (DATE)</b>                                                        | <b>DEFINITIVE</b><br>03/30/2016                                            |                                        |                                                    |
|                                     | <b>EXPERT CURATION (DATE)</b>                                                                  | <b>DEFINITIVE</b><br>12/01/2016                                            |                                        |                                                    |

**Figure S55: Summary matrix and classification for *SMAD3* and autosomal dominant aneurysm-osteoarthritis syndrome.**

**SMARCA1 and autosomal dominant syndromic intellectual disability with Coffin-Syris-like features**

|                                            | Evidence Type                                  | Case Information Type                                                                                  | Guidelines                                                                          |                                                                   |        | Scores |             | PMIDs/Notes                                       |                                                   |                                                      |
|--------------------------------------------|------------------------------------------------|--------------------------------------------------------------------------------------------------------|-------------------------------------------------------------------------------------|-------------------------------------------------------------------|--------|--------|-------------|---------------------------------------------------|---------------------------------------------------|------------------------------------------------------|
|                                            |                                                |                                                                                                        | Default                                                                             | Range                                                             | Max    | Points | Tally       |                                                   |                                                   |                                                      |
| Genetic Evidence                           | Case-Level Data                                | Variant Evidence                                                                                       | Autosomal Dominant or X-linked Disorder                                             | Variant is de novo                                                | 2      | 0-3    | 12          |                                                   |                                                   |                                                      |
|                                            |                                                |                                                                                                        |                                                                                     | Proband with predicted or proven null variant                     | 1.5    | 0-2    | 10          | 1.5                                               | 1.5                                               | Karaca E et al. 2015 Nov 4 (26539891) <sup>115</sup> |
|                                            |                                                |                                                                                                        |                                                                                     | Proband with other variant type with some evidence of gene impact | 0.5    | 0-1.5  | 7           |                                                   |                                                   |                                                      |
|                                            |                                                | Autosomal Recessive Disease                                                                            | Two variants in trans and at least one de novo or a predicted/proven null variant   | 2                                                                 | 0-3    | 12     |             |                                                   |                                                   |                                                      |
|                                            |                                                |                                                                                                        | Two variants (not predicted/proven null) with some evidence of gene impact in trans | 1                                                                 | 0-1.5  |        |             |                                                   |                                                   |                                                      |
|                                            | Segregation Evidence                           | Evidence of segregation in one or more families                                                        | LOD Score Examples                                                                  | 3                                                                 | 5      | 0-7    | 7           |                                                   |                                                   |                                                      |
|                                            |                                                |                                                                                                        |                                                                                     | 2                                                                 | 4      |        |             |                                                   |                                                   |                                                      |
|                                            |                                                |                                                                                                        |                                                                                     | 1.5                                                               | 3      |        |             |                                                   |                                                   |                                                      |
|                                            |                                                |                                                                                                        |                                                                                     | 1                                                                 | 1.5    |        |             |                                                   |                                                   |                                                      |
|                                            |                                                |                                                                                                        |                                                                                     |                                                                   |        |        |             |                                                   |                                                   |                                                      |
| Case-Control Data                          | Case-Control Study Type                        | Case-Control Quality Criteria                                                                          | Guidelines                                                                          |                                                                   | Scores |        | PMIDs/Notes |                                                   |                                                   |                                                      |
|                                            |                                                |                                                                                                        | Points/Study                                                                        | Max                                                               | Points | Tally  |             |                                                   |                                                   |                                                      |
|                                            | Single Variant Analysis                        | 1. Variant Detection Methodology<br>2. Power<br>3. Bias and confounding<br>4. Statistical Significance | 0-6                                                                                 | 12                                                                |        |        |             |                                                   |                                                   |                                                      |
|                                            | Aggregate Variant Analysis                     |                                                                                                        | 0-6                                                                                 | 12                                                                |        |        |             |                                                   |                                                   |                                                      |
| Total Genetic Evidence Points (Maximum 12) |                                                |                                                                                                        |                                                                                     |                                                                   |        |        | 1.5         |                                                   |                                                   |                                                      |
| Experimental Evidence                      | Function                                       | Evidence Type                                                                                          | Biochemical Function                                                                | 0.5                                                               | 0 - 2  | 2      | 1.0         | 1                                                 | Lopes F et al. 2016 Mar (26740508) <sup>116</sup> |                                                      |
|                                            |                                                |                                                                                                        | Protein Interaction                                                                 | 0.5                                                               | 0 - 2  |        |             |                                                   |                                                   |                                                      |
|                                            | Expression                                     |                                                                                                        | 0.5                                                                                 | 0 - 2                                                             |        |        |             |                                                   |                                                   |                                                      |
|                                            | Functional Alteration                          | Cells from affected individual                                                                         | 1                                                                                   | 0 - 2                                                             | 2      |        |             |                                                   |                                                   |                                                      |
|                                            |                                                | Engineered cells                                                                                       | 0.5                                                                                 | 0 - 1                                                             |        |        |             |                                                   |                                                   |                                                      |
|                                            | Models & Rescue                                | Animal model                                                                                           | 2                                                                                   | 0 - 4                                                             | 4      | 2.0    | 2           | Lopes F et al. 2016 Mar (26740508) <sup>116</sup> |                                                   |                                                      |
|                                            |                                                | Cell culture model system                                                                              | 1                                                                                   | 0 - 2                                                             |        |        |             |                                                   |                                                   |                                                      |
|                                            |                                                | Rescue in animal model                                                                                 | 2                                                                                   | 0 - 4                                                             |        |        |             |                                                   |                                                   |                                                      |
|                                            |                                                | Rescue in engineered equivalent                                                                        | 1                                                                                   | 0 - 2                                                             |        |        |             |                                                   |                                                   |                                                      |
|                                            | Total Experimental Evidence Points (Maximum 6) |                                                                                                        |                                                                                     |                                                                   |        |        |             | 3                                                 |                                                   |                                                      |

**Figure S56: Summary of evidence supporting a relationship between SMARCA1 and autosomal dominant syndromic intellectual disability with Coffin-Syris-like features.**

| Assertion criteria                      | Genetic Evidence (0-12 points)                                                                 | Experimental Evidence (0-6 points)                                         | Total Points (0-18)                    | Replication Over Time (Y/N)                        |
|-----------------------------------------|------------------------------------------------------------------------------------------------|----------------------------------------------------------------------------|----------------------------------------|----------------------------------------------------|
| <b>Description</b>                      | Case-level, family segregation, or case-control data that support the gene-disease association | Gene-level experimental evidence that support the gene-disease association | Sum of Genetic & Experimental Evidence | > 2 pubs w/ convincing evidence over time (>3 yrs) |
| <b>Assigned Points</b>                  | <b>1.5</b>                                                                                     | <b>3</b>                                                                   | <b>4.5</b>                             | <b>NO</b>                                          |
| <b>CALCULATED CLASSIFICATION</b>        |                                                                                                | <b>LIMITED</b>                                                             | <b>1-6</b>                             |                                                    |
|                                         |                                                                                                | <b>MODERATE</b>                                                            | <b>7-11</b>                            |                                                    |
|                                         |                                                                                                | <b>STRONG</b>                                                              | <b>12-18</b>                           |                                                    |
|                                         |                                                                                                | <b>DEFINITIVE</b>                                                          | <b>12-18 AND replication over time</b> |                                                    |
| Valid contradictory evidence (Y/N)*     | NO                                                                                             |                                                                            |                                        |                                                    |
| <b>CALCULATED CLASSIFICATION (DATE)</b> |                                                                                                | <b>LIMITED</b><br>06/14/2016                                               |                                        |                                                    |
| <b>EXPERT CURATION (DATE)</b>           |                                                                                                | <b>MODERATE</b><br>11/15/2016                                              |                                        |                                                    |

**Figure S57: Summary matrix and classification for *SMARCA1* and autosomal dominant syndromic intellectual disability with Coffin-Syris-like features.**

| SOS2 and autosomal dominant Noonan syndrome |                                                |                                                                                                        |                                                                                     |                                                                   |        |        |       |                                                                                                                                                              |   |                                                                                                   |
|---------------------------------------------|------------------------------------------------|--------------------------------------------------------------------------------------------------------|-------------------------------------------------------------------------------------|-------------------------------------------------------------------|--------|--------|-------|--------------------------------------------------------------------------------------------------------------------------------------------------------------|---|---------------------------------------------------------------------------------------------------|
|                                             | Evidence Type                                  | Case Information Type                                                                                  | Guidelines                                                                          |                                                                   |        | Scores |       | PMIDs/Notes                                                                                                                                                  |   |                                                                                                   |
|                                             |                                                |                                                                                                        | Default                                                                             | Range                                                             | Max    | Points | Tally |                                                                                                                                                              |   |                                                                                                   |
| Genetic Evidence                            | Case-Level Data                                | Variant Evidence                                                                                       | Autosomal Dominant or X-linked Disorder                                             | Variant is de novo                                                | 2      | 0-3    | 12    | 4.0                                                                                                                                                          | 4 | Yamamoto GL et al. 2015 Jun (25795793); Cordeddu V et al. 2015 Nov (26173643) <sup>117, 118</sup> |
|                                             |                                                |                                                                                                        |                                                                                     | Proband with predicted or proven null variant                     | 1.5    | 0-2    | 10    |                                                                                                                                                              |   |                                                                                                   |
|                                             |                                                |                                                                                                        |                                                                                     | Proband with other variant type with some evidence of gene impact | 0.5    | 0-1.5  | 7     | 3.0                                                                                                                                                          | 3 | Yamamoto GL et al. 2015 Jun (25795793); Cordeddu V et al. 2015 Nov (26173643) <sup>117, 118</sup> |
|                                             |                                                | Autosomal Recessive Disease                                                                            | Two variants in trans and at least one de novo or a predicted/proven null variant   | 2                                                                 | 0-3    | 12     |       |                                                                                                                                                              |   |                                                                                                   |
|                                             |                                                |                                                                                                        | Two variants (not predicted/proven null) with some evidence of gene impact in trans | 1                                                                 | 0-1.5  |        |       |                                                                                                                                                              |   |                                                                                                   |
|                                             | Segregation Evidence                           | Evidence of segregation in one or more families                                                        | LOD Score Examples                                                                  | 3                                                                 | 5      | 0-7    | 7     |                                                                                                                                                              |   |                                                                                                   |
|                                             |                                                |                                                                                                        |                                                                                     | 2                                                                 | 4      |        |       |                                                                                                                                                              |   |                                                                                                   |
|                                             |                                                |                                                                                                        |                                                                                     | 1.5                                                               | 3      |        |       |                                                                                                                                                              |   |                                                                                                   |
|                                             |                                                |                                                                                                        |                                                                                     | 1                                                                 | 1.5    |        |       |                                                                                                                                                              |   |                                                                                                   |
|                                             |                                                |                                                                                                        |                                                                                     |                                                                   |        |        |       |                                                                                                                                                              |   |                                                                                                   |
| Case-Control Data                           | Case-Control Study Type                        | Case-Control Quality Criteria                                                                          | Guidelines                                                                          |                                                                   |        | Scores |       | PMIDs/Notes                                                                                                                                                  |   |                                                                                                   |
|                                             |                                                |                                                                                                        | Points/Study                                                                        | Max                                                               | Points | Tally  |       |                                                                                                                                                              |   |                                                                                                   |
|                                             | Single Variant Analysis                        | 1. Variant Detection Methodology<br>2. Power<br>3. Bias and confounding<br>4. Statistical Significance | 0-6                                                                                 | 12                                                                |        |        |       |                                                                                                                                                              |   |                                                                                                   |
|                                             | Aggregate Variant Analysis                     |                                                                                                        | 0-6                                                                                 | 12                                                                |        |        |       |                                                                                                                                                              |   |                                                                                                   |
| Total Genetic Evidence Points (Maximum 12)  |                                                |                                                                                                        |                                                                                     |                                                                   |        |        |       | 7                                                                                                                                                            |   |                                                                                                   |
| Experimental Evidence                       | Function                                       | Biochemical Function                                                                                   | 0.5                                                                                 | 0 - 2                                                             | 2      | 0.5    | 0.5   | Cordeddu V et al. 2015 Nov (26173643) <sup>118</sup>                                                                                                         |   |                                                                                                   |
|                                             |                                                |                                                                                                        | 0.5                                                                                 | 0 - 2                                                             |        |        |       |                                                                                                                                                              |   |                                                                                                   |
|                                             |                                                |                                                                                                        | 0.5                                                                                 | 0 - 2                                                             |        |        |       |                                                                                                                                                              |   |                                                                                                   |
|                                             | Functional Alteration                          | Cells from affected individual                                                                         | 1                                                                                   | 0 - 2                                                             | 2      | 0.5    | 0.5   | Cordeddu V et al. 2015 Nov (26173643) <sup>118</sup>                                                                                                         |   |                                                                                                   |
|                                             |                                                |                                                                                                        | 0.5                                                                                 | 0 - 1                                                             |        |        |       |                                                                                                                                                              |   |                                                                                                   |
|                                             | Models & Rescue                                | Animal model                                                                                           | 2                                                                                   | 0 - 4                                                             | 4      | 0.0    | 0     | Esteban LM et al. 2000 Sep (10938118) <sup>119</sup> (No points are given. A knock-out mouse described here and this disease mechanism is gain of function.) |   |                                                                                                   |
|                                             |                                                |                                                                                                        | 1                                                                                   | 0 - 2                                                             |        |        |       |                                                                                                                                                              |   |                                                                                                   |
|                                             |                                                |                                                                                                        | 2                                                                                   | 0 - 4                                                             |        |        |       |                                                                                                                                                              |   |                                                                                                   |
|                                             |                                                |                                                                                                        | 1                                                                                   | 0 - 2                                                             |        |        |       |                                                                                                                                                              |   |                                                                                                   |
|                                             | Total Experimental Evidence Points (Maximum 6) |                                                                                                        |                                                                                     |                                                                   |        |        |       |                                                                                                                                                              | 1 |                                                                                                   |

Figure S58: Summary of evidence supporting a relationship between SOS2 and autosomal dominant Noonan syndrome.

| Assertion criteria                      | Genetic Evidence (0-12 points)                                                                 | Experimental Evidence (0-6 points)                                         | Total Points (0-18)                    | Replication Over Time (Y/N)                        |
|-----------------------------------------|------------------------------------------------------------------------------------------------|----------------------------------------------------------------------------|----------------------------------------|----------------------------------------------------|
| <b>Description</b>                      | Case-level, family segregation, or case-control data that support the gene-disease association | Gene-level experimental evidence that support the gene-disease association | Sum of Genetic & Experimental Evidence | > 2 pubs w/ convincing evidence over time (>3 yrs) |
| <b>Assigned Points</b>                  | <b>7</b>                                                                                       | <b>1</b>                                                                   | <b>8</b>                               | <b>NO</b>                                          |
| <b>CALCULATED CLASSIFICATION</b>        |                                                                                                | <b>LIMITED</b>                                                             | <b>1-6</b>                             |                                                    |
|                                         |                                                                                                | <b>MODERATE</b>                                                            | <b>7-11</b>                            |                                                    |
|                                         |                                                                                                | <b>STRONG</b>                                                              | <b>12-18</b>                           |                                                    |
|                                         |                                                                                                | <b>DEFINITIVE</b>                                                          | <b>12-18 AND replication over time</b> |                                                    |
| Valid contradictory evidence (Y/N)*     | NO                                                                                             |                                                                            |                                        |                                                    |
| <b>CALCULATED CLASSIFICATION (DATE)</b> |                                                                                                | <b>MODERATE</b><br>05/26/2016                                              |                                        |                                                    |
| <b>EXPERT CURATION (DATE)</b>           |                                                                                                | <b>MODERATE</b><br>12/05/16                                                |                                        |                                                    |

**Figure S59: Summary matrix and classification for *SOS2* and autosomal dominant Noonan syndrome.**

**TMPO and autosomal dominant dilated cardiomyopathy**

|                                                | Evidence Type              | Case Information Type                                  | Guidelines                                                                          |                                                                   |        | Scores |       | PMIDs/Notes                                                                                                     |     |                                                                                                                              |
|------------------------------------------------|----------------------------|--------------------------------------------------------|-------------------------------------------------------------------------------------|-------------------------------------------------------------------|--------|--------|-------|-----------------------------------------------------------------------------------------------------------------|-----|------------------------------------------------------------------------------------------------------------------------------|
|                                                |                            |                                                        | Default                                                                             | Range                                                             | Max    | Points | Tally |                                                                                                                 |     |                                                                                                                              |
| Genetic Evidence                               | Case-Level Data            | Variant Evidence                                       | Autosomal Dominant or X-linked Disorder                                             | Variant is de novo                                                | 2      | 0-3    | 12    | 0.0                                                                                                             | 0   | Taylor MR et al. 2005 Dec (16247757) <sup>120</sup> (c.2068C>T is classified as Benign/Likely Benign by ClinVar submitters.) |
|                                                |                            |                                                        |                                                                                     | Proband with predicted or proven null variant                     | 1.5    | 0-2    | 10    |                                                                                                                 |     |                                                                                                                              |
|                                                |                            |                                                        |                                                                                     | Proband with other variant type with some evidence of gene impact | 0.5    | 0-1.5  | 7     |                                                                                                                 |     |                                                                                                                              |
|                                                |                            | Autosomal Recessive Disease                            | Two variants in trans and at least one de novo or a predicted/proven null variant   | 2                                                                 | 0-3    | 12     |       |                                                                                                                 |     |                                                                                                                              |
|                                                |                            |                                                        | Two variants (not predicted/proven null) with some evidence of gene impact in trans | 1                                                                 | 0-1.5  |        |       |                                                                                                                 |     |                                                                                                                              |
|                                                | Segregation Evidence       | Evidence of segregation in one or more families        | LOD Score Examples                                                                  | 3                                                                 | 5      | 0-7    | 7     |                                                                                                                 |     |                                                                                                                              |
|                                                |                            |                                                        |                                                                                     | 2                                                                 | 4      |        |       |                                                                                                                 |     |                                                                                                                              |
|                                                |                            |                                                        |                                                                                     | 1.5                                                               | 3      |        |       |                                                                                                                 |     |                                                                                                                              |
|                                                |                            |                                                        |                                                                                     | 1                                                                 | 1.5    |        |       |                                                                                                                 |     |                                                                                                                              |
|                                                |                            |                                                        |                                                                                     |                                                                   |        |        |       |                                                                                                                 |     |                                                                                                                              |
| Case-Control Data                              | Case-Control Study Type    | Case-Control Quality Criteria                          | Guidelines                                                                          |                                                                   |        | Scores |       | PMIDs/Notes                                                                                                     |     |                                                                                                                              |
|                                                |                            |                                                        | Points/Study                                                                        | Max                                                               | Points | Tally  |       |                                                                                                                 |     |                                                                                                                              |
|                                                | Single Variant Analysis    | 1. Variant Detection Methodology<br>2. Power           | 0-6                                                                                 | 12                                                                |        |        |       |                                                                                                                 |     |                                                                                                                              |
|                                                | Aggregate Variant Analysis | 3. Bias and confounding<br>4. Statistical Significance | 0-6                                                                                 | 12                                                                |        |        |       |                                                                                                                 |     |                                                                                                                              |
| Total Genetic Evidence Points (Maximum 12)     |                            |                                                        |                                                                                     |                                                                   |        |        |       | 0                                                                                                               |     |                                                                                                                              |
| Experimental Evidence                          | Evidence Category          | Evidence Type                                          | Guidelines                                                                          |                                                                   |        | Scores |       | PMIDs/Notes                                                                                                     |     |                                                                                                                              |
|                                                |                            |                                                        | Default                                                                             | Range                                                             | Max    | Points | Tally |                                                                                                                 |     |                                                                                                                              |
|                                                | Function                   | Biochemical Function                                   | 0.5                                                                                 | 0 - 2                                                             | 2      | 0.5    | 0.5   | Taylor MR et al. 2005 Dec (16247757) <sup>120</sup> (Interaction of mutated protein product with A-type Lamins) |     |                                                                                                                              |
|                                                |                            | Protein Interaction                                    | 0.5                                                                                 | 0 - 2                                                             |        |        |       |                                                                                                                 |     |                                                                                                                              |
|                                                |                            | Expression                                             | 0.5                                                                                 | 0 - 2                                                             |        |        |       |                                                                                                                 |     |                                                                                                                              |
|                                                | Functional Alteration      | Cells from affected individual                         | 1                                                                                   | 0 - 2                                                             | 2      |        |       |                                                                                                                 |     |                                                                                                                              |
|                                                |                            | Engineered cells                                       | 0.5                                                                                 | 0 - 1                                                             |        |        |       |                                                                                                                 |     |                                                                                                                              |
|                                                | Models & Rescue            | Animal model                                           | 2                                                                                   | 0 - 4                                                             | 4      |        |       |                                                                                                                 |     |                                                                                                                              |
|                                                |                            | Cell culture model system                              | 1                                                                                   | 0 - 2                                                             |        |        |       |                                                                                                                 |     |                                                                                                                              |
|                                                |                            | Rescue in animal model                                 | 2                                                                                   | 0 - 4                                                             |        |        |       |                                                                                                                 |     |                                                                                                                              |
| Rescue in engineered equivalent                |                            | 1                                                      | 0 - 2                                                                               |                                                                   |        |        |       |                                                                                                                 |     |                                                                                                                              |
| Total Experimental Evidence Points (Maximum 6) |                            |                                                        |                                                                                     |                                                                   |        |        |       |                                                                                                                 | 0.5 |                                                                                                                              |

**Figure S60: Summary of evidence for a relationship between *TMPO* and autosomal dominant dilated cardiomyopathy.**

| Assertion criteria                         | Genetic Evidence (0-12 points)                                                                                                                                                                        | Experimental Evidence (0-6 points)                                         | Total Points (0-18)                    | Replication Over Time (Y/N)                        |
|--------------------------------------------|-------------------------------------------------------------------------------------------------------------------------------------------------------------------------------------------------------|----------------------------------------------------------------------------|----------------------------------------|----------------------------------------------------|
| <b>Description</b>                         | Case-level, family segregation, or case-control data that support the gene-disease association                                                                                                        | Gene-level experimental evidence that support the gene-disease association | Sum of Genetic & Experimental Evidence | > 2 pubs w/ convincing evidence over time (>3 yrs) |
| <b>Assigned Points</b>                     |                                                                                                                                                                                                       | <b>0.5</b>                                                                 | <b>0.5</b>                             | <b>NO</b>                                          |
| <b>CALCULATED CLASSIFICATION</b>           |                                                                                                                                                                                                       | <b>LIMITED</b>                                                             | <b>1-6</b>                             |                                                    |
|                                            |                                                                                                                                                                                                       | <b>MODERATE</b>                                                            | <b>7-11</b>                            |                                                    |
|                                            |                                                                                                                                                                                                       | <b>STRONG</b>                                                              | <b>12-18</b>                           |                                                    |
|                                            |                                                                                                                                                                                                       | <b>DEFINITIVE</b>                                                          | <b>12-18 AND replication over time</b> |                                                    |
| <b>Valid contradictory evidence (Y/N)*</b> | YES Taylor MR et al. 2005 Dec (16247757) <sup>120</sup> publication frequency in ExAC. <sup>7</sup> (The only variant that has been reported in association with human disease has been found at high |                                                                            |                                        |                                                    |
| <b>CALCULATED CLASSIFICATION (DATE)</b>    |                                                                                                                                                                                                       | <b>CONFLICTING EVIDENCE REPORTED</b><br>10/07/16                           |                                        |                                                    |
| <b>EXPERT CURATION (DATE)</b>              |                                                                                                                                                                                                       | <b>REFUTED</b><br>11/30/2016                                               |                                        |                                                    |

**Figure S61: Summary matrix and classification for *TMPO* and autosomal dominant dilated cardiomyopathy.**

### VPS8 and autosomal recessive arthrogyrosis

| Evidence Type                                     |                                                       | Case Information Type                                                                                  |                                                                                     | Guidelines                                                        |       |        | Scores     |             | PMIDs/Notes                                                                                   |     |       |
|---------------------------------------------------|-------------------------------------------------------|--------------------------------------------------------------------------------------------------------|-------------------------------------------------------------------------------------|-------------------------------------------------------------------|-------|--------|------------|-------------|-----------------------------------------------------------------------------------------------|-----|-------|
|                                                   |                                                       |                                                                                                        |                                                                                     | Default                                                           | Range | Max    | Points     | Tally       |                                                                                               |     |       |
| Genetic Evidence                                  | Case-Level Data                                       | Variant Evidence                                                                                       | Autosomal Dominant or X-linked Disorder                                             | Variant is de novo                                                | 2     | 0-3    | 12         |             |                                                                                               |     |       |
|                                                   |                                                       |                                                                                                        |                                                                                     | Proband with predicted or proven null variant                     | 1.5   | 0-2    | 10         |             |                                                                                               |     |       |
|                                                   |                                                       |                                                                                                        |                                                                                     | Proband with other variant type with some evidence of gene impact | 0.5   | 0-1.5  | 7          |             |                                                                                               |     |       |
|                                                   |                                                       | Autosomal Recessive Disease                                                                            | Two variants in trans and at least one de novo or a predicted/proven null variant   | 2                                                                 | 0-3   | 12     | 0.0        | 0.5         | Bayram Y et al. 2016 Feb (26752647) <sup>61</sup>                                             |     |       |
|                                                   |                                                       |                                                                                                        | Two variants (not predicted/proven null) with some evidence of gene impact in trans | 1                                                                 | 0-1.5 |        | 0.5        |             |                                                                                               |     |       |
| Segregation Evidence                              | Evidence of segregation in one or more families       | LOD Score Examples                                                                                     | 3                                                                                   | 5                                                                 | 0-7   | 7      |            |             |                                                                                               |     |       |
|                                                   |                                                       |                                                                                                        | 2                                                                                   | 4                                                                 |       |        |            |             |                                                                                               |     |       |
|                                                   |                                                       |                                                                                                        | 1.5                                                                                 | 3                                                                 |       |        |            |             |                                                                                               |     |       |
|                                                   |                                                       |                                                                                                        | 1                                                                                   | 1.5                                                               |       |        |            |             |                                                                                               |     |       |
|                                                   |                                                       |                                                                                                        |                                                                                     |                                                                   |       |        |            |             |                                                                                               |     |       |
| Case-Control Data                                 | Case-Control Study Type                               | Case-Control Quality Criteria                                                                          |                                                                                     | Guidelines                                                        |       | Scores |            | PMIDs/Notes |                                                                                               |     |       |
|                                                   |                                                       |                                                                                                        |                                                                                     | Points/Study                                                      | Max   | Points | Tally      |             |                                                                                               |     |       |
|                                                   | Single Variant Analysis                               | 1. Variant Detection Methodology<br>2. Power<br>3. Bias and confounding<br>4. Statistical Significance |                                                                                     | 0-6                                                               | 12    |        |            |             |                                                                                               |     |       |
|                                                   |                                                       |                                                                                                        |                                                                                     | 0-6                                                               | 12    |        |            |             |                                                                                               |     |       |
| <b>Total Genetic Evidence Points (Maximum 12)</b> |                                                       |                                                                                                        |                                                                                     |                                                                   |       |        | <b>0.5</b> |             |                                                                                               |     |       |
| Experimental Evidence                             | Function                                              | Biochemical Function                                                                                   |                                                                                     | 0.5                                                               | 0 - 2 | 2      | 1.5        | 1.5         | Horazdovsky BF et al. 1996 Dec 27 (8969229); Epp N et al. 2013 (23840658) <sup>121, 122</sup> |     |       |
|                                                   |                                                       |                                                                                                        |                                                                                     | Protein Interaction                                               |       |        |            |             |                                                                                               | 0.5 | 0 - 2 |
|                                                   |                                                       |                                                                                                        |                                                                                     | Expression                                                        |       |        |            |             |                                                                                               | 0.5 | 0 - 2 |
|                                                   | Functional Alteration                                 | Cells from affected individual                                                                         |                                                                                     | 1                                                                 | 0 - 2 | 2      | 0.0        | 0           |                                                                                               |     |       |
|                                                   |                                                       | Engineered cells                                                                                       |                                                                                     | 0.5                                                               | 0 - 1 |        |            |             |                                                                                               |     |       |
|                                                   | Models & Rescue                                       | Animal model                                                                                           |                                                                                     | 2                                                                 | 0 - 4 | 4      | 0.0        | 0           |                                                                                               |     |       |
|                                                   |                                                       | Cell culture model system                                                                              |                                                                                     | 1                                                                 | 0 - 2 |        |            |             |                                                                                               |     |       |
|                                                   |                                                       | Rescue in animal model                                                                                 |                                                                                     | 2                                                                 | 0 - 4 |        |            |             |                                                                                               |     |       |
|                                                   |                                                       | Rescue in engineered equivalent                                                                        |                                                                                     | 1                                                                 | 0 - 2 |        |            |             |                                                                                               |     |       |
|                                                   | <b>Total Experimental Evidence Points (Maximum 6)</b> |                                                                                                        |                                                                                     |                                                                   |       |        |            | <b>1.5</b>  |                                                                                               |     |       |

**Figure S62: Summary of evidence supporting a relationship between VPS8 and autosomal recessive arthrogyrosis.**



| Assertion criteria                      | Genetic Evidence (0-12 points)                                                                 | Experimental Evidence (0-6 points)                                         | Total Points (0-18)                    | Replication Over Time (Y/N)                        |
|-----------------------------------------|------------------------------------------------------------------------------------------------|----------------------------------------------------------------------------|----------------------------------------|----------------------------------------------------|
| <b>Description</b>                      | Case-level, family segregation, or case-control data that support the gene-disease association | Gene-level experimental evidence that support the gene-disease association | Sum of Genetic & Experimental Evidence | > 2 pubs w/ convincing evidence over time (>3 yrs) |
| <b>Assigned Points</b>                  | <b>0.5</b>                                                                                     | <b>1.5</b>                                                                 | <b>2</b>                               | <b>NO</b>                                          |
| <b>CALCULATED CLASSIFICATION</b>        |                                                                                                | <b>LIMITED</b>                                                             | <b>1-6</b>                             |                                                    |
|                                         |                                                                                                | <b>MODERATE</b>                                                            | <b>7-11</b>                            |                                                    |
|                                         |                                                                                                | <b>STRONG</b>                                                              | <b>12-18</b>                           |                                                    |
|                                         |                                                                                                | <b>DEFINITIVE</b>                                                          | <b>12-18 AND replication over time</b> |                                                    |
| Valid contradictory evidence (Y/N)*     | NO                                                                                             |                                                                            |                                        |                                                    |
| <b>CALCULATED CLASSIFICATION (DATE)</b> |                                                                                                | <b>LIMITED</b>                                                             |                                        |                                                    |
| <b>EXPERT CURATION (DATE)</b>           |                                                                                                | <b>LIMITED</b><br>11/24/2016                                               |                                        |                                                    |

**Figure S63: Summary matrix and classification for *VPS8* and autosomal recessive arthrogyposis.**

**WRAP53 and autosomal recessive dyskeratosis congenital**

| Evidence Type                                  |                                                                                     | Case Information Type                                                                                  |                                                                                   | Guidelines                                                        |       |        | Scores                                                                                            |                                                                                                                                                   | PMIDs/Notes |
|------------------------------------------------|-------------------------------------------------------------------------------------|--------------------------------------------------------------------------------------------------------|-----------------------------------------------------------------------------------|-------------------------------------------------------------------|-------|--------|---------------------------------------------------------------------------------------------------|---------------------------------------------------------------------------------------------------------------------------------------------------|-------------|
|                                                |                                                                                     |                                                                                                        |                                                                                   | Default                                                           | Range | Max    | Points                                                                                            | Tally                                                                                                                                             |             |
| Genetic Evidence                               | Case-Level Data                                                                     | Variant Evidence                                                                                       | Autosomal Dominant or X-linked Disorder                                           | Variant is de novo                                                | 2     | 0-3    | 12                                                                                                |                                                                                                                                                   |             |
|                                                |                                                                                     |                                                                                                        |                                                                                   | Proband with predicted or proven null variant                     | 1.5   | 0-2    | 10                                                                                                |                                                                                                                                                   |             |
|                                                |                                                                                     |                                                                                                        |                                                                                   | Proband with other variant type with some evidence of gene impact | 0.5   | 0-1.5  | 7                                                                                                 |                                                                                                                                                   |             |
|                                                |                                                                                     | Autosomal Recessive Disease                                                                            | Two variants in trans and at least one de novo or a predicted/proven null variant | 2                                                                 | 0-3   | 12     | 3.5                                                                                               | Zhong F et al. 2011 Jan 1 (21205863) <sup>123</sup> (The expert chose to upgrade the variant points because of the specificity of the phenotype.) |             |
|                                                | Two variants (not predicted/proven null) with some evidence of gene impact in trans |                                                                                                        | 1                                                                                 | 0-1.5                                                             | 3.5   |        |                                                                                                   |                                                                                                                                                   |             |
| Segregation Evidence                           | Evidence of segregation in one or more families                                     | LOD Score Examples                                                                                     | 3<br>2<br>1.5<br>1                                                                | 5<br>4<br>3<br>1.5                                                | 0-7   | 7      |                                                                                                   |                                                                                                                                                   |             |
| Case-Control Data                              | Case-Control Study Type                                                             | Case-Control Quality Criteria                                                                          | Guidelines                                                                        |                                                                   |       | Scores |                                                                                                   | PMIDs/Notes                                                                                                                                       |             |
|                                                | Single Variant Analysis                                                             | 1. Variant Detection Methodology<br>2. Power<br>3. Bias and confounding<br>4. Statistical Significance | Points/Study                                                                      |                                                                   | Max   | Points | Tally                                                                                             |                                                                                                                                                   |             |
|                                                | Aggregate Variant Analysis                                                          |                                                                                                        | 0-6                                                                               | 12                                                                |       |        |                                                                                                   |                                                                                                                                                   |             |
| Total Genetic Evidence Points (Maximum 12)     |                                                                                     |                                                                                                        |                                                                                   |                                                                   |       |        | 3.5                                                                                               |                                                                                                                                                   |             |
| Experimental Evidence                          | Function                                                                            | Biochemical Function                                                                                   | 0.5                                                                               | 0 - 2                                                             | 2     | 2.5    | 2                                                                                                 | Freund A et al. 2014 Dec 4 (25467444); Zhong F et al. 2011 Jan 1 (21205863); Mahmoudi S et al. 2010 Nov 2 (21072240) <sup>74; 123; 124</sup>      |             |
|                                                |                                                                                     | Protein Interaction                                                                                    | 0.5                                                                               | 0 - 2                                                             |       |        |                                                                                                   |                                                                                                                                                   |             |
|                                                |                                                                                     | Expression                                                                                             | 0.5                                                                               | 0 - 2                                                             |       |        |                                                                                                   |                                                                                                                                                   |             |
|                                                | Functional Alteration                                                               | Cells from affected individual                                                                         | 1                                                                                 | 0 - 2                                                             | 2     | 3.5    | 2                                                                                                 | Zhong F et al. 2011 Jan 1 (21205863); Batista LF et al. 2011 May 22 (21602826) <sup>123; 125</sup>                                                |             |
|                                                |                                                                                     | Engineered cells                                                                                       | 0.5                                                                               | 0 - 1                                                             |       |        |                                                                                                   |                                                                                                                                                   |             |
| Models & Rescue                                | Animal model                                                                        | 2                                                                                                      | 0 - 4                                                                             | 4                                                                 | 2.0   | 2      | Zhong F et al. 2011 Jan 1 (21205863); Mahmoudi S et al. 2010 Nov 2 (21072240) <sup>123; 125</sup> |                                                                                                                                                   |             |
|                                                | Cell culture model system                                                           | 1                                                                                                      | 0 - 2                                                                             |                                                                   |       |        |                                                                                                   |                                                                                                                                                   |             |
|                                                | Rescue in animal model                                                              | 2                                                                                                      | 0 - 4                                                                             |                                                                   |       |        |                                                                                                   |                                                                                                                                                   |             |
|                                                | Rescue in engineered equivalent                                                     | 1                                                                                                      | 0 - 2                                                                             |                                                                   |       |        |                                                                                                   |                                                                                                                                                   |             |
| Total Experimental Evidence Points (Maximum 6) |                                                                                     |                                                                                                        |                                                                                   |                                                                   |       |        | 6                                                                                                 |                                                                                                                                                   |             |

**Figure S64: Summary of evidence supporting a relationship between WRAP53 and autosomal recessive dyskeratosis congenital.**

| Assertion criteria                      | Genetic Evidence (0-12 points)                                                                 | Experimental Evidence (0-6 points)                                         | Total Points (0-18)                    | Replication Over Time (Y/N)                        |
|-----------------------------------------|------------------------------------------------------------------------------------------------|----------------------------------------------------------------------------|----------------------------------------|----------------------------------------------------|
| <b>Description</b>                      | Case-level, family segregation, or case-control data that support the gene-disease association | Gene-level experimental evidence that support the gene-disease association | Sum of Genetic & Experimental Evidence | > 2 pubs w/ convincing evidence over time (>3 yrs) |
| <b>Assigned Points</b>                  | <b>3.5</b>                                                                                     | <b>6</b>                                                                   | <b>9.5</b>                             | <b>NO</b>                                          |
| <b>CALCULATED CLASSIFICATION</b>        |                                                                                                | <b>LIMITED</b>                                                             | <b>1-6</b>                             |                                                    |
|                                         |                                                                                                | <b>MODERATE</b>                                                            | <b>7-11</b>                            |                                                    |
|                                         |                                                                                                | <b>STRONG</b>                                                              | <b>12-18</b>                           |                                                    |
|                                         |                                                                                                | <b>DEFINITIVE</b>                                                          | <b>12-18 AND replication over time</b> |                                                    |
| Valid contradictory evidence (Y/N)*     | NO                                                                                             |                                                                            |                                        |                                                    |
| <b>CALCULATED CLASSIFICATION (DATE)</b> |                                                                                                | <b>MODERATE</b>                                                            |                                        |                                                    |
| <b>MODIFY CALCULATED CLASSIFICATION</b> |                                                                                                | YES                                                                        |                                        |                                                    |
| <b>CURATOR CLASSIFICATION (DATE)</b>    |                                                                                                | <b>LIMITED</b><br>08/04/2016                                               |                                        |                                                    |
| <b>EXPERT CURATION (DATE)</b>           |                                                                                                | <b>MODERATE</b><br>01/25/2017                                              |                                        |                                                    |

**Figure S65: Summary matrix and classification for *WRAP53* and autosomal recessive dyskeratosis congenital.** This gene/disease relationship was initially classified as limited by the curator. During expert review, the expert added more experimental evidence and it was increased to moderate.

## Supplemental References

1. Takeshita, E., Nakagawa, E., Nakatani, K., Sasaki, M., and Goto, Y. (2012). Novel AGTR2 missense mutation in a Japanese boy with severe mental retardation, pervasive developmental disorder, and epilepsy. *Brain & development* 34, 776-779.
2. Vervoort, V.S., Beachem, M.A., Edwards, P.S., Ladd, S., Miller, K.E., de Mollerat, X., Clarkson, K., DuPont, B., Schwartz, C.E., Stevenson, R.E., et al. (2002). AGTR2 mutations in X-linked mental retardation. *Science* 296, 2401-2403.
3. Pawlowski, T.L., Heringer-Walther, S., Cheng, C.H., Archie, J.G., Chen, C.F., Walther, T., and Srivastava, A.K. (2009). Candidate Agtr2 influenced genes and pathways identified by expression profiling in the developing brain of Agtr2(-/y) mice. *Genomics* 94, 188-195.
4. Maul, B., von Bohlen und Halbach, O., Becker, A., Sterner-Kock, A., Voigt, J.P., Siems, W.E., Grecksch, G., and Walther, T. (2008). Impaired spatial memory and altered dendritic spine morphology in angiotensin II type 2 receptor-deficient mice. *Journal of molecular medicine* 86, 563-571.
5. Richards, S., Aziz, N., Bale, S., Bick, D., Das, S., Gastier-Foster, J., Grody, W.W., Hegde, M., Lyon, E., Spector, E., et al. (2015). Standards and guidelines for the interpretation of sequence variants: a joint consensus recommendation of the American College of Medical Genetics and Genomics and the Association for Molecular Pathology. *Genetics in medicine : official journal of the American College of Medical Genetics* 17, 405-424.
6. Piton, A., Redin, C., and Mandel, J.L. (2013). XLID-causing mutations and associated genes challenged in light of data from large-scale human exome sequencing. *American journal of human genetics* 93, 368-383.
7. Lek, M., Karczewski, K.J., Minikel, E.V., Samocha, K.E., Banks, E., Fennell, T., O'Donnell-Luria, A.H., Ware, J.S., Hill, A.J., Cummings, B.B., et al. (2016). Analysis of protein-coding genetic variation in 60,706 humans. *Nature* 536, 285-291.
8. Chen, L., Marquardt, M.L., Tester, D.J., Sampson, K.J., Ackerman, M.J., and Kass, R.S. (2007). Mutation of an A-kinase-anchoring protein causes long-QT syndrome. *Proceedings of the National Academy of Sciences of the United States of America* 104, 20990-20995.
9. Marx, S.O., Kurokawa, J., Reiken, S., Motoike, H., D'Armiento, J., Marks, A.R., and Kass, R.S. (2002). Requirement of a macromolecular signaling complex for beta adrenergic receptor modulation of the KCNQ1-KCNE1 potassium channel. *Science* 295, 496-499.
10. Kohl, S., Zobor, D., Chiang, W.C., Weisschuh, N., Staller, J., Gonzalez Menendez, I., Chang, S., Beck, S.C., Garcia Garrido, M., Sothilingam, V., et al. (2015). Mutations in the unfolded protein response regulator ATF6 cause the cone dysfunction disorder achromatopsia. *Nature genetics* 47, 757-765.
11. Ansar, M., Santos-Cortez, R.L., Saqib, M.A., Zulfiqar, F., Lee, K., Ashraf, N.M., Ullah, E., Wang, X., Sajid, S., Khan, F.S., et al. (2015). Mutation of ATF6 causes autosomal recessive achromatopsia. *Human genetics* 134, 941-950.
12. Selcen, D., Muntoni, F., Burton, B.K., Pegoraro, E., Sewry, C., Bite, A.V., and Engel, A.G. (2009). Mutation in BAG3 causes severe dominant childhood muscular dystrophy. *Annals of neurology* 65, 83-89.
13. Odgerel, Z., Sarkozy, A., Lee, H.S., McKenna, C., Rankin, J., Straub, V., Lochmuller, H., Paola, F.,

- D'Amico, A., Bertini, E., et al. (2010). Inheritance patterns and phenotypic features of myofibrillar myopathy associated with a BAG3 mutation. *Neuromuscular disorders* : NMD 20, 438-442.
14. Semmler, A.L., Sacconi, S., Bach, J.E., Liebe, C., Burmann, J., Kley, R.A., Ferbert, A., Anderheiden, R., Van den Bergh, P., Martin, J.J., et al. (2014). Unusual multisystemic involvement and a novel BAG3 mutation revealed by NGS screening in a large cohort of myofibrillar myopathies. *Orphanet journal of rare diseases* 9, 121.
  15. Konersman, C.G., Bordini, B.J., Scharer, G., Lawlor, M.W., Zangwill, S., Southern, J.F., Amos, L., Geddes, G.C., Kliegman, R., and Collins, M.P. (2015). BAG3 myofibrillar myopathy presenting with cardiomyopathy. *Neuromuscular disorders* : NMD 25, 418-422.
  16. Kostera-Pruszczyk, A., Suszek, M., Ploski, R., Franaszczyk, M., Potulska-Chromik, A., Pruszczyk, P., Sadurska, E., Karolczak, J., Kaminska, A.M., and Redowicz, M.J. (2015). BAG3-related myopathy, polyneuropathy and cardiomyopathy with long QT syndrome. *Journal of muscle research and cell motility* 36, 423-432.
  17. D'Avila, F., Meregalli, M., Lupoli, S., Barcella, M., Orro, A., De Santis, F., Sitzia, C., Farini, A., D'Ursi, P., Erratico, S., et al. (2016). Exome sequencing identifies variants in two genes encoding the LIM-proteins NRAP and FHL1 in an Italian patient with BAG3 myofibrillar myopathy. *Journal of muscle research and cell motility* 37, 101-115.
  18. Jaffer, F., Murphy, S.M., Scoto, M., Healy, E., Rossor, A.M., Brandner, S., Phadke, R., Selcen, D., Jungbluth, H., Muntoni, F., et al. (2012). BAG3 mutations: another cause of giant axonal neuropathy. *Journal of the peripheral nervous system* : JPNS 17, 210-216.
  19. Homma, S., Iwasaki, M., Shelton, G.D., Engvall, E., Reed, J.C., and Takayama, S. (2006). BAG3 deficiency results in fulminant myopathy and early lethality. *The American journal of pathology* 169, 761-773.
  20. Hishiya, A., Kitazawa, T., and Takayama, S. (2010). BAG3 and Hsc70 interact with actin capping protein CapZ to maintain myofibrillar integrity under mechanical stress. *Circulation research* 107, 1220-1231.
  21. McAdam, R.A., Goundis, D., and Reid, K.B. (1988). A homozygous point mutation results in a stop codon in the C1q B-chain of a C1q-deficient individual. *Immunogenetics* 27, 259-264.
  22. Petry, F., Hauptmann, G., Goetz, J., Grosshans, E., and Loos, M. (1997). Molecular basis of a new type of C1q-deficiency associated with a non-functional low molecular weight (LMW) C1q: parallels and differences to other known genetic C1q-defects. *Immunopharmacology* 38, 189-201.
  23. Marquart, H.V., Schejbel, L., Sjöholm, A., Martensson, U., Nielsen, S., Koch, A., Svejgaard, A., and Garred, P. (2007). C1q deficiency in an Inuit family: identification of a new class of C1q disease-causing mutations. *Clinical immunology* 124, 33-40.
  24. Troedson, C., Wong, M., Dalby-Payne, J., Wilson, M., Dexter, M., Rice, G.I., Crow, Y.J., and Dale, R.C. (2013). Systemic lupus erythematosus due to C1q deficiency with progressive encephalopathy, intracranial calcification and acquired moyamoya cerebral vasculopathy. *Lupus* 22, 639-643.
  25. Higuchi, Y., Shimizu, J., Hatanaka, M., Kitano, E., Kitamura, H., Takada, H., Ishimura, M., Hara, T., Ohara, O., Asagoe, K., et al. (2013). The identification of a novel splicing mutation in C1qB in a Japanese family with C1q deficiency: a case report. *Pediatric rheumatology online journal* 11, 41.
  26. van Schaarenburg, R.A., Daha, N.A., Schonkeren, J.J., Nivine Levarht, E.W., van Gijlswijk-Janssen, D.J., Kurreeman, F.A., Roos, A., van Kooten, C., Koelman, C.A., Ernst-Kruis, M.R., et al. (2015).

Identification of a novel non-coding mutation in C1qB in a Dutch child with C1q deficiency associated with recurrent infections. *Immunobiology* 220, 422-427.

27. Miura-Shimura, Y., Nakamura, K., Ohtsuji, M., Tomita, H., Jiang, Y., Abe, M., Zhang, D., Hamano, Y., Tsuda, H., Hashimoto, H., et al. (2002). C1q regulatory region polymorphism down-regulating murine c1q protein levels with linkage to lupus nephritis. *Journal of immunology* 169, 1334-1339.
28. Soudais, C., de Villartay, J.P., Le Deist, F., Fischer, A., and Lisowska-Groszpierska, B. (1993). Independent mutations of the human CD3-epsilon gene resulting in a T cell receptor/CD3 complex immunodeficiency. *Nature genetics* 3, 77-81.
29. de Saint Basile, G., Geissmann, F., Flori, E., Uring-Lambert, B., Soudais, C., Cavazzana-Calvo, M., Durandy, A., Jabado, N., Fischer, A., and Le Deist, F. (2004). Severe combined immunodeficiency caused by deficiency in either the delta or the epsilon subunit of CD3. *The Journal of clinical investigation* 114, 1512-1517.
30. Fuehrer, M., Pannicke, U., Schuetz, C., Jacobsen, E.M., Schulz, A., Friedrich, W., Schwarz, K., and Honig, M. (2014). Successful haploidentical hematopoietic stem cell transplantation in a patient with SCID due to CD3epsilon deficiency: need for IgG-substitution 6 years later. *Klinische Padiatrie* 226, 149-153.
31. Manolios, N., Letourneur, F., Bonifacino, J.S., and Klausner, R.D. (1991). Pairwise, cooperative and inhibitory interactions describe the assembly and probable structure of the T-cell antigen receptor. *The EMBO journal* 10, 1643-1651.
32. Thoenes, G., Soudais, C., le Deist, F., Griscelli, C., Fischer, A., and Lisowska-Groszpierska, B. (1992). Structural analysis of low TCR-CD3 complex expression in T cells of an immunodeficient patient. *The Journal of biological chemistry* 267, 487-493.
33. Wang, B., Biron, C., She, J., Higgins, K., Sunshine, M.J., Lacy, E., Lonberg, N., and Terhorst, C. (1994). A block in both early T lymphocyte and natural killer cell development in transgenic mice with high-copy numbers of the human CD3E gene. *Proceedings of the National Academy of Sciences of the United States of America* 91, 9402-9406.
34. Hwang, D.Y., Dworschak, G.C., Kohl, S., Saisawat, P., Vivante, A., Hilger, A.C., Reutter, H.M., Soliman, N.A., Bogdanovic, R., Kehinde, E.O., et al. (2014). Mutations in 12 known dominant disease-causing genes clarify many congenital anomalies of the kidney and urinary tract. *Kidney international* 85, 1429-1433.
35. Brockschmidt, A., Chung, B., Weber, S., Fischer, D.C., Kolatsi-Joannou, M., Christ, L., Heimbach, A., Shtiza, D., Klaus, G., Simonetti, G.D., et al. (2012). CHD1L: a new candidate gene for congenital anomalies of the kidneys and urinary tract (CAKUT). *Nephrology, dialysis, transplantation : official publication of the European Dialysis and Transplant Association - European Renal Association* 27, 2355-2364.
36. Jurgens, J., Sobreira, N., Modaff, P., Reiser, C.A., Seo, S.H., Seong, M.W., Park, S.S., Kim, O.H., Cho, T.J., and Pauli, R.M. (2015). Novel COL2A1 variant (c.619G>A, p.Gly207Arg) manifesting as a phenotype similar to progressive pseudorheumatoid dysplasia and spondyloepiphyseal dysplasia, Stanescu type. *Human mutation* 36, 1004-1008.
37. Hammarsjo, A., Nordgren, A., Lagerstedt-Robinson, K., Malmgren, H., Nilsson, D., Wedren, S., Nordenskjold, M., Nishimura, G., and Grigelioniene, G. (2016). Pathogenic variant in the COL2A1 gene is associated with Spondyloepiphyseal dysplasia type Stanescu. *American journal of medical genetics Part A* 170A, 266-269.

38. Chan, D., Taylor, T.K., and Cole, W.G. (1993). Characterization of an arginine 789 to cysteine substitution in alpha 1 (II) collagen chains of a patient with spondyloepiphyseal dysplasia. *The Journal of biological chemistry* 268, 15238-15245.
39. Vandenberg, P., Khillan, J.S., Prockop, D.J., Helminen, H., Kontusaari, S., and Ala-Kokko, L. (1991). Expression of a partially deleted gene of human type II procollagen (COL2A1) in transgenic mice produces a chondrodysplasia. *Proceedings of the National Academy of Sciences of the United States of America* 88, 7640-7644.
40. Garofalo, S., Vuorio, E., Metsaranta, M., Rosati, R., Toman, D., Vaughan, J., Lozano, G., Mayne, R., Ellard, J., Horton, W., et al. (1991). Reduced amounts of cartilage collagen fibrils and growth plate anomalies in transgenic mice harboring a glycine-to-cysteine mutation in the mouse type II procollagen alpha 1-chain gene. *Proceedings of the National Academy of Sciences of the United States of America* 88, 9648-9652.
41. Hill, D.A., Ivanovich, J., Priest, J.R., Gurnett, C.A., Dehner, L.P., Desruisseau, D., Jarzembowski, J.A., Wikenheiser-Brokamp, K.A., Suarez, B.K., Whelan, A.J., et al. (2009). DICER1 mutations in familial pleuropulmonary blastoma. *Science* 325, 965.
42. Doros, L., Yang, J., Dehner, L., Rossi, C.T., Skiver, K., Jarzembowski, J.A., Messinger, Y., Schultz, K.A., Williams, G., Andre, N., et al. (2012). DICER1 mutations in embryonal rhabdomyosarcomas from children with and without familial PPB-tumor predisposition syndrome. *Pediatric blood & cancer* 59, 558-560.
43. Stewart, D.R., Messinger, Y., Williams, G.M., Yang, J., Field, A., Schultz, K.A., Harney, L.A., Doros, L.A., Dehner, L.P., and Hill, D.A. (2014). Nasal chondromesenchymal hamartomas arise secondary to germline and somatic mutations of DICER1 in the pleuropulmonary blastoma tumor predisposition disorder. *Human genetics* 133, 1443-1450.
44. Harris, K.S., Zhang, Z., McManus, M.T., Harfe, B.D., and Sun, X. (2006). Dicer function is essential for lung epithelium morphogenesis. *Proceedings of the National Academy of Sciences of the United States of America* 103, 2208-2213.
45. Rousseau, F., Bonaventure, J., Legeai-Mallet, L., Pelet, A., Rozet, J.M., Maroteaux, P., Le Merrer, M., and Munnich, A. (1994). Mutations in the gene encoding fibroblast growth factor receptor-3 in achondroplasia. *Nature* 371, 252-254.
46. Shiang, R., Thompson, L.M., Zhu, Y.Z., Church, D.M., Fielder, T.J., Bocian, M., Winokur, S.T., and Wasmuth, J.J. (1994). Mutations in the transmembrane domain of FGFR3 cause the most common genetic form of dwarfism, achondroplasia. *Cell* 78, 335-342.
47. Naski, M.C., Colvin, J.S., Coffin, J.D., and Ornitz, D.M. (1998). Repression of hedgehog signaling and BMP4 expression in growth plate cartilage by fibroblast growth factor receptor 3. *Development* 125, 4977-4988.
48. Cho, J.Y., Guo, C., Torello, M., Lunstrum, G.P., Iwata, T., Deng, C., and Horton, W.A. (2004). Defective lysosomal targeting of activated fibroblast growth factor receptor 3 in achondroplasia. *Proceedings of the National Academy of Sciences of the United States of America* 101, 609-614.
49. Wang, Y., Spatz, M.K., Kannan, K., Hayk, H., Avivi, A., Gorivodsky, M., Pines, M., Yaron, A., Lonai, P., and Givol, D. (1999). A mouse model for achondroplasia produced by targeting fibroblast growth factor receptor 3. *Proceedings of the National Academy of Sciences of the United States of America* 96, 4455-4460.
50. Au, P.Y., You, J., Caluseriu, O., Schwartzentruber, J., Majewski, J., Bernier, F.P., Ferguson, M., Valle,

- D., Parboosingh, J.S., Sobreira, N., et al. (2015). GeneMatcher aids in the identification of a new malformation syndrome with intellectual disability, unique facial dysmorphisms, and skeletal and connective tissue abnormalities caused by de novo variants in HNRNPK. *Human mutation* 36, 1009-1014.
51. Lange, L., Pagnamenta, A.T., Lise, S., Clasper, S., Stewart, H., Akha, E.S., Quaghebeur, G., Knight, S.J., Keays, D.A., Taylor, J.C., et al. (2016). A de novo frameshift in HNRNPK causing a Kabuki-like syndrome with nodular heterotopia. *Clinical genetics* 90, 258-262.
  52. Fan, X., Xiong, H., Wei, J., Gao, X., Feng, Y., Liu, X., Zhang, G., He, Q.Y., Xu, J., and Liu, L. (2015). Cytoplasmic hnRNP K interacts with GSK3beta and is essential for the osteoclast differentiation. *Scientific reports* 5, 17732.
  53. Gallardo, M., Lee, H.J., Zhang, X., Bueso-Ramos, C., Pagon, L.R., McArthur, M., Multani, A., Nazha, A., Manshouri, T., Parker-Thornburg, J., et al. (2015). hnRNP K Is a Haploinsufficient Tumor Suppressor that Regulates Proliferation and Differentiation Programs in Hematologic Malignancies. *Cancer cell* 28, 486-499.
  54. Radmanesh, F., Caglayan, A.O., Silhavy, J.L., Yilmaz, C., Cantagrel, V., Omar, T., Rosti, B., Kaymakcalan, H., Gabriel, S., Li, M., et al. (2013). Mutations in LAMB1 cause cobblestone brain malformation without muscular or ocular abnormalities. *American journal of human genetics* 92, 468-474.
  55. Lee, J., and Gross, J.M. (2007). Laminin beta1 and gamma1 containing laminins are essential for basement membrane integrity in the zebrafish eye. *Investigative ophthalmology & visual science* 48, 2483-2490.
  56. Sobreira, N., Modaff, P., Steel, G., You, J., Nanda, S., Hoover-Fong, J., Valle, D., and Pauli, R.M. (2015). An anadysplasia-like, spontaneously remitting spondylometaphyseal dysplasia secondary to lamin B receptor (LBR) gene mutations: further definition of the phenotypic heterogeneity of LBR-bone dysplasias. *American journal of medical genetics Part A* 167A, 159-163.
  57. Borovik, L., Modaff, P., Waterham, H.R., Krentz, A.D., and Pauli, R.M. (2013). Pelger-huet anomaly and a mild skeletal phenotype secondary to mutations in LBR. *American journal of medical genetics Part A* 161A, 2066-2073.
  58. Olins, A.L., Rhodes, G., Welch, D.B., Zwerger, M., and Olins, D.E. (2010). Lamin B receptor: multi-tasking at the nuclear envelope. *Nucleus* 1, 53-70.
  59. Zwerger, M., Kolb, T., Richter, K., Karakesisoglou, I., and Herrmann, H. (2010). Induction of a massive endoplasmic reticulum and perinuclear space expansion by expression of lamin B receptor mutants and the related sterol reductases TM7SF2 and DHCR7. *Molecular biology of the cell* 21, 354-368.
  60. Shultz, L.D., Lyons, B.L., Burzenski, L.M., Gott, B., Samuels, R., Schweitzer, P.A., Dreger, C., Herrmann, H., Kalscheuer, V., Olins, A.L., et al. (2003). Mutations at the mouse ichthyosis locus are within the lamin B receptor gene: a single gene model for human Pelger-Huet anomaly. *Human molecular genetics* 12, 61-69.
  61. Bayram, Y., Karaca, E., Coban Akdemir, Z., Yilmaz, E.O., Tayfun, G.A., Aydin, H., Torun, D., Bozdogan, S.T., Gezirici, A., Isikay, S., et al. (2016). Molecular etiology of arthrogyrosis in multiple families of mostly Turkish origin. *The Journal of clinical investigation* 126, 762-778.
  62. Chieragatti, E., Gartner, A., Stoffler, H.E., and Bahler, M. (1998). Myr 7 is a novel myosin IX-RhoGAP expressed in rat brain. *Journal of cell science* 111 ( Pt 24), 3597-3608.



63. Gorman, S.W., Haider, N.B., Grieshammer, U., Swiderski, R.E., Kim, E., Welch, J.W., Searby, C., Leng, S., Carmi, R., Sheffield, V.C., et al. (1999). The cloning and developmental expression of unconventional myosin IXA (MYO9A) a gene in the Bardet-Biedl syndrome (BBS4) region at chromosome 15q22-q23. *Genomics* 59, 150-160.
64. Omelchenko, T., and Hall, A. (2012). Myosin-IXA regulates collective epithelial cell migration by targeting RhoGAP activity to cell-cell junctions. *Current biology* : CB 22, 278-288.
65. Need, A.C., Shashi, V., Hitomi, Y., Schoch, K., Shianna, K.V., McDonald, M.T., Meisler, M.H., and Goldstein, D.B. (2012). Clinical application of exome sequencing in undiagnosed genetic conditions. *Journal of medical genetics* 49, 353-361.
66. Caglayan, A.O., Comu, S., Baranoski, J.F., Parman, Y., Kaymakcalan, H., Akgumus, G.T., Caglar, C., Dolen, D., Erson-Omay, E.Z., Harmanci, A.S., et al. (2015). NGLY1 mutation causes neuromotor impairment, intellectual disability, and neuropathy. *European journal of medical genetics* 58, 39-43.
67. Enns, G.M., Shashi, V., Bainbridge, M., Gambello, M.J., Zahir, F.R., Bast, T., Crimian, R., Schoch, K., Platt, J., Cox, R., et al. (2014). Mutations in NGLY1 cause an inherited disorder of the endoplasmic reticulum-associated degradation pathway. *Genetics in medicine : official journal of the American College of Medical Genetics* 16, 751-758.
68. Bosch, D.G., Boonstra, F.N., de Leeuw, N., Pfundt, R., Nillesen, W.M., de Ligt, J., Gilissen, C., Jhangiani, S., Lupski, J.R., Cremers, F.P., et al. (2016). Novel genetic causes for cerebral visual impairment. *European journal of human genetics* : EJHG 24, 660-665.
69. Heeley, J., and Shinawi, M. (2015). Multi-systemic involvement in NGLY1-related disorder caused by two novel mutations. *American journal of medical genetics Part A* 167A, 816-820.
70. He, P., Grotzke, J.E., Ng, B.G., Gunel, M., Jafar-Nejad, H., Cresswell, P., Enns, G.M., and Freeze, H.H. (2015). A congenital disorder of deglycosylation: Biochemical characterization of N-glycanase 1 deficiency in patient fibroblasts. *Glycobiology* 25, 836-844.
71. Huang, C., Harada, Y., Hosomi, A., Masahara-Negishi, Y., Seino, J., Fujihira, H., Funakoshi, Y., Suzuki, T., Dohmae, N., and Suzuki, T. (2015). Endo-beta-N-acetylglucosaminidase forms N-GlcNAc protein aggregates during ER-associated degradation in Ngly1-defective cells. *Proceedings of the National Academy of Sciences of the United States of America* 112, 1398-1403.
72. Vulliamy, T., Beswick, R., Kirwan, M., Marrone, A., Digweed, M., Walne, A., and Dokal, I. (2008). Mutations in the telomerase component NHP2 cause the premature ageing syndrome dyskeratosis congenita. *Proceedings of the National Academy of Sciences of the United States of America* 105, 8073-8078.
73. Trahan, C., Martel, C., and Dragon, F. (2010). Effects of dyskeratosis congenita mutations in dyskerin, NHP2 and NOP10 on assembly of H/ACA pre-RNPs. *Human molecular genetics* 19, 825-836.
74. Freund, A., Zhong, F.L., Venteicher, A.S., Meng, Z., Veenstra, T.D., Frydman, J., and Artandi, S.E. (2014). Proteostatic control of telomerase function through TRiC-mediated folding of TCAB1. *Cell* 159, 1389-1403.
75. Dez, C., Henras, A., Faucon, B., Lafontaine, D., Caizergues-Ferrer, M., and Henry, Y. (2001). Stable expression in yeast of the mature form of human telomerase RNA depends on its association with the box H/ACA small nucleolar RNP proteins Cbf5p, Nhp2p and Nop10p. *Nucleic acids research* 29, 598-603.

76. Erkko, H., Xia, B., Nikkila, J., Schleutker, J., Syrjakoski, K., Mannermaa, A., Kallioniemi, A., Pylkas, K., Karppinen, S.M., Rapakko, K., et al. (2007). A recurrent mutation in PALB2 in Finnish cancer families. *Nature* 446, 316-319.
77. Heikkinen, T., Karkkainen, H., Aaltonen, K., Milne, R.L., Heikkila, P., Aittomaki, K., Blomqvist, C., and Nevanlinna, H. (2009). The breast cancer susceptibility mutation PALB2 1592delT is associated with an aggressive tumor phenotype. *Clinical cancer research : an official journal of the American Association for Cancer Research* 15, 3214-3222.
78. Casadei, S., Norquist, B.M., Walsh, T., Stray, S., Mandell, J.B., Lee, M.K., Stamatoyannopoulos, J.A., and King, M.C. (2011). Contribution of inherited mutations in the BRCA2-interacting protein PALB2 to familial breast cancer. *Cancer research* 71, 2222-2229.
79. Hartley, T., Cavallone, L., Sabbaghian, N., Silva-Smith, R., Hamel, N., Aleynikova, O., Smith, E., Hastings, V., Pinto, P., Tischkowitz, M., et al. (2014). Mutation analysis of PALB2 in BRCA1 and BRCA2-negative breast and/or ovarian cancer families from Eastern Ontario, Canada. *Hereditary cancer in clinical practice* 12, 19.
80. Janatova, M., Kleibl, Z., Stribrna, J., Panczak, A., Vesela, K., Zimovjanova, M., Kleiblova, P., Dunder, P., Soukupova, J., and Pohlreich, P. (2013). The PALB2 gene is a strong candidate for clinical testing in BRCA1- and BRCA2-negative hereditary breast cancer. *Cancer epidemiology, biomarkers & prevention : a publication of the American Association for Cancer Research, cosponsored by the American Society of Preventive Oncology* 22, 2323-2332.
81. Cybulski, C., Kluzniak, W., Huzarski, T., Wokolorczyk, D., Kashyap, A., Jakubowska, A., Szwiec, M., Byrski, T., Debniak, T., Gorski, B., et al. (2015). Clinical outcomes in women with breast cancer and a PALB2 mutation: a prospective cohort analysis. *The Lancet Oncology* 16, 638-644.
82. Xia, B., Sheng, Q., Nakanishi, K., Ohashi, A., Wu, J., Christ, N., Liu, X., Jasin, M., Couch, F.J., and Livingston, D.M. (2006). Control of BRCA2 cellular and clinical functions by a nuclear partner, PALB2. *Molecular cell* 22, 719-729.
83. Bowman-Colin, C., Xia, B., Bunting, S., Klijn, C., Drost, R., Bouwman, P., Fineman, L., Chen, X., Culhane, A.C., Cai, H., et al. (2013). Palb2 synergizes with Trp53 to suppress mammary tumor formation in a model of inherited breast cancer. *Proceedings of the National Academy of Sciences of the United States of America* 110, 8632-8637.
84. Vaz, F., Hanenberg, H., Schuster, B., Barker, K., Wiek, C., Erven, V., Neveling, K., Endt, D., Kesterton, I., Autore, F., et al. (2010). Mutation of the RAD51C gene in a Fanconi anemia-like disorder. *Nature genetics* 42, 406-409.
85. Somyajit, K., Subramanya, S., and Nagaraju, G. (2012). Distinct roles of FANCO/RAD51C protein in DNA damage signaling and repair: implications for Fanconi anemia and breast cancer susceptibility. *The Journal of biological chemistry* 287, 3366-3380.
86. Baker, J.L., Schwab, R.B., Wallace, A.M., and Madlensky, L. (2015). Breast cancer in a RAD51D mutation carrier: case report and review of the literature. *Clinical breast cancer* 15, e71-75.
87. Loveday, C., Turnbull, C., Ramsay, E., Hughes, D., Ruark, E., Frankum, J.R., Bowden, G., Kalmyrzaev, B., Warren-Perry, M., Snape, K., et al. (2011). Germline mutations in RAD51D confer susceptibility to ovarian cancer. *Nature genetics* 43, 879-882.
88. Pelttari, L.M., Kiiski, J., Nurminen, R., Kallioniemi, A., Schleutker, J., Gylfe, A., Aaltonen, L.A., Leminen, A., Heikkila, P., Blomqvist, C., et al. (2012). A Finnish founder mutation in RAD51D: analysis in breast, ovarian, prostate, and colorectal cancer. *Journal of medical genetics* 49, 429-432.

89. Osher, D.J., De Leeneer, K., Michils, G., Hamel, N., Tomiak, E., Poppe, B., Leunen, K., Legius, E., Shuen, A., Smith, E., et al. (2012). Mutation analysis of RAD51D in non-BRCA1/2 ovarian and breast cancer families. *British journal of cancer* 106, 1460-1463.
90. Schild, D., Lio, Y.C., Collins, D.W., Tsomondo, T., and Chen, D.J. (2000). Evidence for simultaneous protein interactions between human Rad51 paralogs. *The Journal of biological chemistry* 275, 16443-16449.
91. Martin, R.W., Orelli, B.J., Yamazoe, M., Minn, A.J., Takeda, S., and Bishop, D.K. (2007). RAD51 up-regulation bypasses BRCA1 function and is a common feature of BRCA1-deficient breast tumors. *Cancer research* 67, 9658-9665.
92. Smiraldo, P.G., Gruver, A.M., Osborn, J.C., and Pittman, D.L. (2005). Extensive chromosomal instability in Rad51d-deficient mouse cells. *Cancer research* 65, 2089-2096.
93. Dowty, J.G., Lose, F., Jenkins, M.A., Chang, J.H., Chen, X., Beesley, J., Dite, G.S., Southey, M.C., Byrnes, G.B., Tesoriero, A., et al. (2008). The RAD51D E233G variant and breast cancer risk: population-based and clinic-based family studies of Australian women. *Breast cancer research and treatment* 112, 35-39.
94. Jara, L., Dubois, K., Gaete, D., de Mayo, T., Ratkevicius, N., Bravo, T., Margarit, S., Blanco, R., Gomez, F., Waugh, E., et al. (2010). Variants in DNA double-strand break repair genes and risk of familial breast cancer in a South American population. *Breast cancer research and treatment* 122, 813-822.
95. Wickramanayake, A., Bernier, G., Pennil, C., Casadei, S., Agnew, K.J., Stray, S.M., Mandell, J., Garcia, R.L., Walsh, T., King, M.C., et al. (2012). Loss of function germline mutations in RAD51D in women with ovarian carcinoma. *Gynecologic oncology* 127, 552-555.
96. Gutierrez-Enriquez, S., Bonache, S., de Garibay, G.R., Osorio, A., Santamarina, M., Ramon y Cajal, T., Esteban-Cardenosa, E., Tenes, A., Yanowsky, K., Barroso, A., et al. (2014). About 1% of the breast and ovarian Spanish families testing negative for BRCA1 and BRCA2 are carriers of RAD51D pathogenic variants. *International journal of cancer* 134, 2088-2097.
97. Doherty, L., Sheen, M.R., Vlachos, A., Choesmel, V., O'Donohue, M.F., Clinton, C., Schneider, H.E., Sieff, C.A., Newburger, P.E., Ball, S.E., et al. (2010). Ribosomal protein genes RPS10 and RPS26 are commonly mutated in Diamond-Blackfan anemia. *American journal of human genetics* 86, 222-228.
98. Smetanina, N.S., Mersiyanova, I.V., Kurnikova, M.A., Ovsyannikova, G.S., Hachatryan, L.A., Bobrynina, V.O., Maschan, M.A., Novichkova, G.A., Lipton, J.M., and Maschan, A.A. (2015). Clinical and genomic heterogeneity of Diamond Blackfan anemia in the Russian Federation. *Pediatric blood & cancer* 62, 1597-1600.
99. Yazaki, M., Kamei, M., Ito, Y., Konno, Y., Wang, R., Toki, T., and Ito, E. (2012). A novel mutation of ribosomal protein S10 gene in a Japanese patient with diamond-Blackfan anemia. *Journal of pediatric hematology/oncology* 34, 293-295.
100. Havugimana, P.C., Hart, G.T., Nepusz, T., Yang, H., Turinsky, A.L., Li, Z., Wang, P.I., Boutz, D.R., Fong, V., Phanse, S., et al. (2012). A census of human soluble protein complexes. *Cell* 150, 1068-1081.
101. Kristensen, A.R., Gsponer, J., and Foster, L.J. (2012). A high-throughput approach for measuring temporal changes in the interactome. *Nature methods* 9, 907-909.

102. Quarello, P., Garelli, E., Carando, A., Brusco, A., Calabrese, R., Dufour, C., Longoni, D., Misuraca, A., Vinti, L., Aspesi, A., et al. (2010). Diamond-Blackfan anemia: genotype-phenotype correlations in Italian patients with RPL5 and RPL11 mutations. *Haematologica* 95, 206-213.
103. Landowski, M., O'Donohue, M.F., Buros, C., Ghazvinian, R., Montel-Lehry, N., Vlachos, A., Sieff, C.A., Newburger, P.E., Niewiadomska, E., Matysiak, M., et al. (2013). Novel deletion of RPL15 identified by array-comparative genomic hybridization in Diamond-Blackfan anemia. *Human genetics* 132, 1265-1274.
104. Gazda, H.T., Grabowska, A., Merida-Long, L.B., Latawiec, E., Schneider, H.E., Lipton, J.M., Vlachos, A., Atsidaftos, E., Ball, S.E., Orfali, K.A., et al. (2006). Ribosomal protein S24 gene is mutated in Diamond-Blackfan anemia. *American journal of human genetics* 79, 1110-1118.
105. Choessel, V., Fribourg, S., Aguisa-Toure, A.H., Pinaud, N., Legrand, P., Gazda, H.T., and Gleizes, P.E. (2008). Mutation of ribosomal protein RPS24 in Diamond-Blackfan anemia results in a ribosome biogenesis disorder. *Human molecular genetics* 17, 1253-1263.
106. Medeiros-Domingo, A., Kaku, T., Tester, D.J., Iturralde-Torres, P., Itty, A., Ye, B., Valdivia, C., Ueda, K., Canizales-Quinteros, S., Tusie-Luna, M.T., et al. (2007). SCN4B-encoded sodium channel beta4 subunit in congenital long-QT syndrome. *Circulation* 116, 134-142.
107. Carmignac, V., Thevenon, J., Ades, L., Callewaert, B., Julia, S., Thauvin-Robinet, C., Gueneau, L., Courcet, J.B., Lopez, E., Holman, K., et al. (2012). In-frame mutations in exon 1 of SKI cause dominant Shprintzen-Goldberg syndrome. *American journal of human genetics* 91, 950-957.
108. Doyle, A.J., Doyle, J.J., Bessling, S.L., Maragh, S., Lindsay, M.E., Schepers, D., Gillis, E., Mortier, G., Homfray, T., Sauls, K., et al. (2012). Mutations in the TGF-beta repressor SKI cause Shprintzen-Goldberg syndrome with aortic aneurysm. *Nature genetics* 44, 1249-1254.
109. van de Laar, I.M., Oldenburg, R.A., Pals, G., Roos-Hesselink, J.W., de Graaf, B.M., Verhagen, J.M., Hoedemaekers, Y.M., Willemsen, R., Severijnen, L.A., Venselaar, H., et al. (2011). Mutations in SMAD3 cause a syndromic form of aortic aneurysms and dissections with early-onset osteoarthritis. *Nature genetics* 43, 121-126.
110. Regalado, E.S., Guo, D.C., Villamizar, C., Avidan, N., Gilchrist, D., McGillivray, B., Clarke, L., Bernier, F., Santos-Cortez, R.L., Leal, S.M., et al. (2011). Exome sequencing identifies SMAD3 mutations as a cause of familial thoracic aortic aneurysm and dissection with intracranial and other arterial aneurysms. *Circulation research* 109, 680-686.
111. van de Laar, I.M., van der Linde, D., Oei, E.H., Bos, P.K., Bessems, J.H., Bierma-Zeinstra, S.M., van Meer, B.L., Pals, G., Oldenburg, R.A., Bekkers, J.A., et al. (2012). Phenotypic spectrum of the SMAD3-related aneurysms-osteoarthritis syndrome. *Journal of medical genetics* 49, 47-57.
112. Verrecchia, F., and Mauviel, A. (2007). Transforming growth factor-beta and fibrosis. *World journal of gastroenterology* 13, 3056-3062.
113. Yang, X., Chen, L., Xu, X., Li, C., Huang, C., and Deng, C.X. (2001). TGF-beta/Smad3 signals repress chondrocyte hypertrophic differentiation and are required for maintaining articular cartilage. *The Journal of cell biology* 153, 35-46.
114. Tan, C.K., Tan, E.H., Luo, B., Huang, C.L., Loo, J.S., Choong, C., and Tan, N.S. (2013). SMAD3 deficiency promotes inflammatory aortic aneurysms in angiotensin II-infused mice via activation of iNOS. *Journal of the American Heart Association* 2, e000269.
115. Karaca, E., Harel, T., Pehlivan, D., Jhangiani, S.N., Gambin, T., Coban Akdemir, Z., Gonzaga-

- Jauregui, C., Erdin, S., Bayram, Y., Campbell, I.M., et al. (2015). Genes that Affect Brain Structure and Function Identified by Rare Variant Analyses of Mendelian Neurologic Disease. *Neuron* 88, 499-513.
116. Lopes, F., Barbosa, M., Ameer, A., Soares, G., de Sa, J., Dias, A.I., Oliveira, G., Cabral, P., Temudo, T., Calado, E., et al. (2016). Identification of novel genetic causes of Rett syndrome-like phenotypes. *Journal of medical genetics* 53, 190-199.
117. Yamamoto, G.L., Agüena, M., Gos, M., Hung, C., Pilch, J., Fahiminiya, S., Abramowicz, A., Cristian, I., Buscarilli, M., Naslavsky, M.S., et al. (2015). Rare variants in *SOS2* and *LZTR1* are associated with Noonan syndrome. *Journal of medical genetics* 52, 413-421.
118. Cordeddu, V., Yin, J.C., Gunnarsson, C., Virtanen, C., Drunat, S., Lepri, F., De Luca, A., Rossi, C., Ciolfi, A., Pugh, T.J., et al. (2015). Activating Mutations Affecting the Dbl Homology Domain of *SOS2* Cause Noonan Syndrome. *Human mutation* 36, 1080-1087.
119. Esteban, L.M., Fernandez-Medarde, A., Lopez, E., Yienger, K., Guerrero, C., Ward, J.M., Tessarollo, L., and Santos, E. (2000). Ras-guanine nucleotide exchange factor *sos2* is dispensable for mouse growth and development. *Molecular and cellular biology* 20, 6410-6413.
120. Taylor, M.R., Slavov, D., Gajewski, A., Vlcek, S., Ku, L., Fain, P.R., Carniel, E., Di Lenarda, A., Sinagra, G., Boucek, M.M., et al. (2005). Thymopoietin (lamina-associated polypeptide 2) gene mutation associated with dilated cardiomyopathy. *Human mutation* 26, 566-574.
121. Horazdovsky, B.F., Cowles, C.R., Mustol, P., Holmes, M., and Emr, S.D. (1996). A novel RING finger protein, *Vps8p*, functionally interacts with the small GTPase, *Vps21p*, to facilitate soluble vacuolar protein localization. *The Journal of biological chemistry* 271, 33607-33615.
122. Epp, N., and Ungermann, C. (2013). The N-terminal domains of *Vps3* and *Vps8* are critical for localization and function of the CORVET tethering complex on endosomes. *PLoS one* 8, e67307.
123. Zhong, F., Savage, S.A., Shkreli, M., Giri, N., Jessop, L., Myers, T., Chen, R., Alter, B.P., and Artandi, S.E. (2011). Disruption of telomerase trafficking by *TCAB1* mutation causes dyskeratosis congenita. *Genes & development* 25, 11-16.
124. Mahmoudi, S., Henriksson, S., Weibrecht, I., Smith, S., Soderberg, O., Stromblad, S., Wiman, K.G., and Farnebo, M. (2010). *WRAP53* is essential for Cajal body formation and for targeting the survival of motor neuron complex to Cajal bodies. *PLoS biology* 8, e1000521.
125. Batista, L.F., Pech, M.F., Zhong, F.L., Nguyen, H.N., Xie, K.T., Zaugg, A.J., Crary, S.M., Choi, J., Sebastiano, V., Cherry, A., et al. (2011). Telomere shortening and loss of self-renewal in dyskeratosis congenita induced pluripotent stem cells. *Nature* 474, 399-402.
